# Supplementary material
Source: publisher figshare collection journal article supplement (https://gsajournals.figshare.com/ndownloader/files/27462773)
Supplement: Supplementary file 1 [file 27462773]

clone,PotVar0024144,PotVar0071549,PotVar0131022,PotVar0131111,PotVar0131172,PotVar0131182,PotVar0131195,PotVar0131220,PotVar0131232,PotVar0131246,solcap_snp_c2_41424,solcap_snp_c2_41427,solcap_snp_c2_41431,solcap_snp_c2_24258,solcap_snp_c1_6721,solcap_snp_c2_21332,solcap_snp_c2_21317,solcap_snp_c2_21316,solcap_snp_c1_6716,solcap_snp_c2_21314,solcap_snp_c2_4431,solcap_snp_c2_4433,solcap_snp_c2_4437,solcap_snp_c2_6674,solcap_snp_c2_56547,solcap_snp_c2_56548,solcap_snp_c2_6680,solcap_snp_c2_48820,solcap_snp_c2_48821,solcap_snp_c1_11008,solcap_snp_c1_11013,solcap_snp_c1_11023,solcap_snp_c1_11025,solcap_snp_c2_36940,solcap_snp_c2_36941,solcap_snp_c2_36942,solcap_snp_c2_36951,solcap_snp_c1_11027,solcap_snp_c2_36952,solcap_snp_c2_36955,solcap_snp_c1_11030,solcap_snp_c1_11031,solcap_snp_c2_36956,solcap_snp_c2_54301,solcap_snp_c2_54303,solcap_snp_c2_54306,solcap_snp_c1_15241,solcap_snp_c1_15242,solcap_snp_c2_21313,solcap_snp_c2_21331,solcap_snp_c2_54624,solcap_snp_c2_53181,solcap_snp_c2_53180,solcap_snp_c2_53179,solcap_snp_c2_53177,solcap_snp_c2_53176,solcap_snp_c2_54070,solcap_snp_c2_54069,solcap_snp_c1_15330,solcap_snp_c1_15331,solcap_snp_c2_2334,solcap_snp_c2_2332,solcap_snp_c1_16178,solcap_snp_c2_55722,solcap_snp_c2_53198,solcap_snp_c2_56809,solcap_snp_c2_56812,solcap_snp_c1_1535,solcap_snp_c2_37599,solcap_snp_c1_11239,solcap_snp_c2_57676,solcap_snp_c2_57482,solcap_snp_c2_57483,solcap_snp_c2_57485,solcap_snp_c2_57588,solcap_snp_c2_57589,solcap_snp_c2_57590,solcap_snp_c2_57591,solcap_snp_c1_15694,solcap_snp_c2_53886,solcap_snp_c2_5793,solcap_snp_c2_5791,solcap_snp_c2_42771,solcap_snp_c2_51460,solcap_snp_c2_36608,solcap_snp_c2_36615,PotVar0120130,PotVar0120099,PotVar0120075,PotVar0120070,solcap_snp_c2_36629,PotVar0120067,solcap_snp_c2_36639,PotVar0119973,PotVar0119966,PotVar0119913,solcap_snp_c2_36640,solcap_snp_c1_10915,PotVar0119785,solcap_snp_c2_36659,solcap_snp_c2_36660,solcap_snp_c2_36664,solcap_snp_c2_36665,solcap_snp_c1_10922,solcap_snp_c1_10924,solcap_snp_c1_10926,solcap_snp_c2_36675,solcap_snp_c2_54797,solcap_snp_c2_56715,solcap_snp_c1_2425,solcap_snp_c2_6759,solcap_snp_c2_6767,solcap_snp_c2_6768,solcap_snp_c1_2426,solcap_snp_c2_54816,PotVar0071723,PotVar0071738,PotVar0071757,PotVar0071846,PotVar0071852,PotVar0071853,solcap_snp_c2_54817,PotVar0071945,PotVar0071966,PotVar0072033,PotVar0072052,PotVar0072068,PotVar0072076,solcap_snp_c2_6683,solcap_snp_c1_2417,solcap_snp_c2_21078,PotVar0044815,PotVar0044821,PotVar0044823,PotVar0044826,PotVar0044829,PotVar0044840,solcap_snp_c2_21090,solcap_snp_c2_21098,solcap_snp_c2_21100,solcap_snp_c2_21109,solcap_snp_c2_21174,solcap_snp_c2_21176,solcap_snp_c2_21178,solcap_snp_c1_6674,PotVar0044864,PotVar0044963,PotVar0044984,PotVar0044985,PotVar0044998,PotVar0045000,solcap_snp_c2_21216,solcap_snp_c2_21233,solcap_snp_c1_6704,solcap_snp_c2_21236,solcap_snp_c2_21247,solcap_snp_c2_21262,solcap_snp_c1_6707,solcap_snp_c1_6122,solcap_snp_c2_19396,solcap_snp_c2_19384,solcap_snp_c1_6114,solcap_snp_c1_6109,solcap_snp_c1_6108,solcap_snp_c2_19358,solcap_snp_c2_19355,solcap_snp_c2_19353,solcap_snp_c2_19310,solcap_snp_c2_19302,solcap_snp_c2_19268,solcap_snp_c2_19251,PotVar0045145,PotVar0045238,PotVar0045260,PotVar0045339,PotVar0045340,solcap_snp_c2_19420,PotVar0045401,PotVar0045420,PotVar0045428,PotVar0045460,PotVar0045505,PotVar0045583,PotVar0045651,PotVar0045660,PotVar0045662,solcap_snp_c1_6118,solcap_snp_c2_51812,solcap_snp_c2_51811,solcap_snp_c2_51810,solcap_snp_c2_51808,solcap_snp_c2_51807,solcap_snp_c2_51806,solcap_snp_c2_51805,solcap_snp_c2_51800,solcap_snp_c2_51799,solcap_snp_c2_51791,solcap_snp_c2_55010,solcap_snp_c2_55012,solcap_snp_c2_48054,solcap_snp_c2_48051,solcap_snp_c1_14212,solcap_snp_c1_14210,solcap_snp_c2_56114,solcap_snp_c2_45058,solcap_snp_c2_45068,solcap_snp_c1_13307,solcap_snp_c2_45070,solcap_snp_c2_45071,solcap_snp_c2_45072,solcap_snp_c1_13312,solcap_snp_c2_45080,solcap_snp_c1_13318,solcap_snp_c2_45043,solcap_snp_c2_45044,solcap_snp_c2_45045,solcap_snp_c2_45051,solcap_snp_c2_45060,solcap_snp_c2_45061,solcap_snp_c2_45064,solcap_snp_c1_13290,solcap_snp_c1_13293,solcap_snp_c2_45065,solcap_snp_c2_45066,solcap_snp_c1_13296,solcap_snp_c1_13297,solcap_snp_c2_45067,solcap_snp_c2_27877,solcap_snp_c2_27878,solcap_snp_c2_27885,solcap_snp_c1_8606,solcap_snp_c1_8608,solcap_snp_c2_27903,solcap_snp_c2_27902,solcap_snp_c2_27900,solcap_snp_c2_27899,solcap_snp_c2_27897,solcap_snp_c2_27896,solcap_snp_c2_27894,solcap_snp_c2_27918,solcap_snp_c2_53841,solcap_snp_c2_53842,solcap_snp_c2_48155,solcap_snp_c2_50013,solcap_snp_c2_50014,solcap_snp_c2_38350,solcap_snp_c1_11430,solcap_snp_c2_52705,solcap_snp_c2_52704,PotVar0071575,PotVar0071624,PotVar0071625,PotVar0071645,PotVar0071686,solcap_snp_c2_48549,solcap_snp_c2_48538,solcap_snp_c2_43644,solcap_snp_c1_12858,solcap_snp_c1_12859,solcap_snp_c2_43645,solcap_snp_c1_16334,solcap_snp_c2_56359,solcap_snp_c1_16516,solcap_snp_c1_16515,solcap_snp_c2_57290,solcap_snp_c2_57284,solcap_snp_c2_45631,solcap_snp_c2_45627,solcap_snp_c2_45626,solcap_snp_c2_45625,solcap_snp_c1_13548,solcap_snp_c1_13538,solcap_snp_c2_45623,solcap_snp_c2_45622,solcap_snp_c2_45621,solcap_snp_c2_55008,solcap_snp_c2_53521,solcap_snp_c1_12938,solcap_snp_c2_43981,solcap_snp_c2_43973,solcap_snp_c1_8906,solcap_snp_c1_8908,solcap_snp_c2_54355,solcap_snp_c2_54353,solcap_snp_c2_57176,solcap_snp_c2_57185,solcap_snp_c2_715,solcap_snp_c2_48568,solcap_snp_c1_8593,solcap_snp_c2_53763,solcap_snp_c2_53759,solcap_snp_c2_56842,solcap_snp_c1_14664,solcap_snp_c2_49759,solcap_snp_c2_49758,PotVar0119382,PotVar0119387,solcap_snp_c2_54581,PotVar0081045,solcap_snp_c2_43643,solcap_snp_c1_7143,solcap_snp_c2_22549,PotVar0122454,PotVar0122473,PotVar0122493,PotVar0122547,PotVar0122549,PotVar0122551,solcap_snp_c1_7142,solcap_snp_c2_22531,solcap_snp_c2_22530,PotVar0037326,solcap_snp_c1_7136,PotVar0037260,solcap_snp_c2_24678,solcap_snp_c1_15793,solcap_snp_c2_46231,solcap_snp_c1_11066,solcap_snp_c2_37027,solcap_snp_c2_50607,solcap_snp_c1_14902,PotVar0000007,PotVar0000025,PotVar0000040,PotVar0000042,PotVar0000060,PotVar0000062,PotVar0000066,solcap_snp_c1_9378,solcap_snp_c2_51027,solcap_snp_c1_14955,solcap_snp_c1_14956,solcap_snp_c2_51033,solcap_snp_c2_46546,solcap_snp_c2_46540,solcap_snp_c1_13816,solcap_snp_c1_13814,solcap_snp_c1_13825,solcap_snp_c1_13822,solcap_snp_c1_15961,solcap_snp_c1_3693,solcap_snp_c2_27682,solcap_snp_c2_27680,solcap_snp_c1_8541,solcap_snp_c2_45395,solcap_snp_c2_34938,solcap_snp_c2_49729,solcap_snp_c1_14648,solcap_snp_c1_14649,solcap_snp_c2_49720,solcap_snp_c2_49722,solcap_snp_c2_49724,solcap_snp_c2_49726,solcap_snp_c2_49728,solcap_snp_c2_32110,solcap_snp_c2_32112,solcap_snp_c2_50028,solcap_snp_c1_14731,solcap_snp_c2_50023,solcap_snp_c1_14728,solcap_snp_c1_14511,solcap_snp_c2_49042,solcap_snp_c2_49031,solcap_snp_c1_14512,solcap_snp_c2_49044,solcap_snp_c2_53334,solcap_snp_c1_16169,solcap_snp_c1_14563,solcap_snp_c2_48162,solcap_snp_c1_14248,solcap_snp_c1_14249,solcap_snp_c1_14259,PotVar0081105,PotVar0081102,solcap_snp_c2_48161,solcap_snp_c2_53708,solcap_snp_c1_16690,solcap_snp_c2_40134,solcap_snp_c2_40131,PotVar0095159,PotVar0095162,solcap_snp_c2_40111,PotVar0095169,PotVar0095184,PotVar0095207,solcap_snp_c1_11872,solcap_snp_c2_40105,solcap_snp_c2_54811,PotVar0132265,PotVar0132333,PotVar0071533,PotVar0071528,solcap_snp_c2_35220,solcap_snp_c2_35218,solcap_snp_c1_8358,solcap_snp_c1_8362,solcap_snp_c2_35603,PotVar0102161,PotVar0102189,PotVar0102233,PotVar0102235,PotVar0102236,PotVar0102246,solcap_snp_c2_687,solcap_snp_c2_686,solcap_snp_c2_711,solcap_snp_c2_41441,solcap_snp_c2_41438,solcap_snp_c1_9958,solcap_snp_c2_2910,solcap_snp_c2_2873,solcap_snp_c2_55624,solcap_snp_c2_55618,solcap_snp_c1_14219,PotVar0018985,PotVar0018983,PotVar0018968,solcap_snp_c2_45672,solcap_snp_c2_45675,solcap_snp_c1_13575,solcap_snp_c2_51827,solcap_snp_c2_32334,solcap_snp_c2_32337,PotVar0018933,PotVar0018848,PotVar0018833,PotVar0018832,solcap_snp_c2_43285,solcap_snp_c2_43288,solcap_snp_c2_56416,solcap_snp_c1_14633,solcap_snp_c2_49617,solcap_snp_c2_49619,solcap_snp_c2_2723,solcap_snp_c2_2721,solcap_snp_c2_2719,solcap_snp_c1_805,solcap_snp_c1_803,solcap_snp_c2_2653,solcap_snp_c2_2637,solcap_snp_c1_779,solcap_snp_c2_2591,solcap_snp_c2_45299,solcap_snp_c2_45289,solcap_snp_c2_45286,solcap_snp_c1_13430,solcap_snp_c1_13429,solcap_snp_c2_45301,PotVar0018693,PotVar0018687,solcap_snp_c2_55151,solcap_snp_c2_46523,solcap_snp_c2_46521,solcap_snp_c2_53348,solcap_snp_c2_53347,solcap_snp_c2_35544,solcap_snp_c2_35503,solcap_snp_c2_35518,solcap_snp_c2_35520,solcap_snp_c2_35532,solcap_snp_c2_35536,solcap_snp_c2_35537,solcap_snp_c2_35539,PotVar0124717,PotVar0124722,solcap_snp_c2_43926,solcap_snp_c2_56267,solcap_snp_c2_20798,solcap_snp_c2_20799,solcap_snp_c2_20803,solcap_snp_c2_20823,solcap_snp_c2_20829,solcap_snp_c2_20851,solcap_snp_c2_20858,PotVar0006142,PotVar0006140,PotVar0006125,PotVar0006106,PotVar0006104,PotVar0006050,PotVar0005994,solcap_snp_c2_20890,solcap_snp_c2_20910,solcap_snp_c2_20926,PotVar0049777,PotVar0049732,PotVar0049722,PotVar0049721,solcap_snp_c2_50903,PotVar0049692,PotVar0049691,PotVar0049689,solcap_snp_c2_50926,solcap_snp_c2_38436,solcap_snp_c2_38417,solcap_snp_c2_38406,solcap_snp_c2_38405,solcap_snp_c2_38404,PotVar0049651,PotVar0049628,PotVar0049593,PotVar0049564,PotVar0049560,PotVar0049553,PotVar0049549,PotVar0049542,solcap_snp_c2_38390,solcap_snp_c2_38438,solcap_snp_c2_41951,solcap_snp_c1_12297,PotVar0049521,PotVar0049493,PotVar0049427,PotVar0049426,PotVar0049419,solcap_snp_c1_12118,solcap_snp_c2_41363,solcap_snp_c2_41927,solcap_snp_c2_41930,solcap_snp_c2_41364,PotVar0049369,PotVar0049351,solcap_snp_c1_12106,PotVar0049291,solcap_snp_c2_41258,solcap_snp_c2_41262,solcap_snp_c1_12114,PotVar0049273,PotVar0049267,solcap_snp_c1_12124,solcap_snp_c2_41335,solcap_snp_c2_41336,solcap_snp_c2_41337,solcap_snp_c2_41339,PotVar0049199,PotVar0049174,PotVar0049169,PotVar0049099,PotVar0049079,PotVar0049037,solcap_snp_c2_32367,solcap_snp_c1_9667,solcap_snp_c1_9679,PotVar0049005,solcap_snp_c1_9676,solcap_snp_c2_40954,PotVar0126021,PotVar0126028,PotVar0126035,PotVar0126039,PotVar0126043,PotVar0126052,PotVar0126146,solcap_snp_c2_40955,solcap_snp_c2_46207,solcap_snp_c1_13686,solcap_snp_c2_46195,PotVar0032875,PotVar0032877,PotVar0032879,PotVar0032910,PotVar0032984,PotVar0032987,PotVar0033007,PotVar0033081,PotVar0033086,solcap_snp_c2_13751,solcap_snp_c1_4415,solcap_snp_c2_13671,solcap_snp_c2_13653,solcap_snp_c2_13650,solcap_snp_c2_14454,solcap_snp_c1_4744,PotVar0033135,PotVar0033183,PotVar0033208,PotVar0033227,solcap_snp_c2_14467,PotVar0033406,solcap_snp_c2_14470,PotVar0033411,PotVar0033462,PotVar0033498,PotVar0033735,PotVar0033829,solcap_snp_c1_4706,solcap_snp_c2_14487,solcap_snp_c2_14489,solcap_snp_c2_14491,solcap_snp_c2_14492,solcap_snp_c2_14493,PotVar0033845,PotVar0033883,PotVar0033907,solcap_snp_c2_14517,solcap_snp_c2_14580,solcap_snp_c2_14586,solcap_snp_c1_4748,solcap_snp_c1_4752,solcap_snp_c2_14608,solcap_snp_c1_4757,PotVar0129906,PotVar0129854,PotVar0129853,PotVar0129842,PotVar0129827,PotVar0129817,solcap_snp_c2_14613,solcap_snp_c1_4763,solcap_snp_c2_14616,solcap_snp_c2_37575,solcap_snp_c2_37574,solcap_snp_c2_37571,solcap_snp_c1_5150,solcap_snp_c2_16039,solcap_snp_c2_16037,solcap_snp_c2_16033,solcap_snp_c1_5145,PotVar0098809,PotVar0098794,PotVar0098772,PotVar0098727,PotVar0098709,PotVar0098682,PotVar0098622,PotVar0098595,solcap_snp_c2_20569,PotVar0098536,solcap_snp_c2_20500,PotVar0098530,solcap_snp_c2_20501,PotVar0098524,solcap_snp_c2_20506,solcap_snp_c2_20507,PotVar0098497,PotVar0098430,PotVar0098422,PotVar0098389,solcap_snp_c2_20513,solcap_snp_c2_20521,solcap_snp_c2_20522,solcap_snp_c1_6501,PotVar0072121,PotVar0072139,PotVar0072144,PotVar0072157,PotVar0072158,PotVar0072169,PotVar0072200,PotVar0072262,PotVar0072297,PotVar0072312,solcap_snp_c1_6518,solcap_snp_c1_6521,solcap_snp_c2_13766,solcap_snp_c2_52492,solcap_snp_c2_13758,solcap_snp_c2_52484,solcap_snp_c1_15340,PotVar0072385,PotVar0072433,PotVar0072434,PotVar0072436,PotVar0072441,PotVar0072443,solcap_snp_c1_14588,solcap_snp_c2_49467,solcap_snp_c2_49473,solcap_snp_c2_49476,solcap_snp_c2_49451,solcap_snp_c1_14044,solcap_snp_c2_47313,solcap_snp_c2_51055,solcap_snp_c2_51057,PotVar0043831,PotVar0043824,PotVar0043821,PotVar0043815,PotVar0043814,PotVar0043740,PotVar0043707,PotVar0043665,PotVar0043656,PotVar0043650,PotVar0043648,solcap_snp_c1_11769,solcap_snp_c2_39834,PotVar0043570,PotVar0043559,PotVar0043531,PotVar0043516,PotVar0043484,PotVar0043426,solcap_snp_c2_17529,PotVar0043347,solcap_snp_c1_5759,solcap_snp_c2_17530,solcap_snp_c2_17531,solcap_snp_c2_17537,PotVar0043296,solcap_snp_c2_17539,solcap_snp_c1_5762,solcap_snp_c1_15579,solcap_snp_c1_15580,solcap_snp_c2_53380,solcap_snp_c2_53381,solcap_snp_c2_17204,solcap_snp_c2_17198,solcap_snp_c2_17192,solcap_snp_c2_17184,solcap_snp_c1_5669,solcap_snp_c1_5667,solcap_snp_c1_5656,solcap_snp_c1_5653,solcap_snp_c2_17156,solcap_snp_c2_17145,solcap_snp_c2_17185,solcap_snp_c2_12171,solcap_snp_c1_3901,solcap_snp_c2_12204,solcap_snp_c1_3844,solcap_snp_c2_12076,solcap_snp_c2_12087,solcap_snp_c2_12088,solcap_snp_c2_12092,solcap_snp_c2_12093,solcap_snp_c1_3866,solcap_snp_c2_12094,solcap_snp_c2_12095,solcap_snp_c2_12098,solcap_snp_c1_3867,solcap_snp_c1_3868,solcap_snp_c2_12106,solcap_snp_c2_12107,solcap_snp_c2_12111,solcap_snp_c2_12113,solcap_snp_c2_12116,solcap_snp_c1_3892,solcap_snp_c1_3894,solcap_snp_c1_3895,solcap_snp_c2_12123,solcap_snp_c2_12125,solcap_snp_c2_12126,solcap_snp_c1_3910,PotVar0006158,PotVar0006198,PotVar0006243,PotVar0006246,solcap_snp_c2_12139,solcap_snp_c2_12157,solcap_snp_c1_3922,solcap_snp_c1_3925,solcap_snp_c2_12161,solcap_snp_c1_3928,PotVar0006268,PotVar0006273,PotVar0006278,PotVar0006306,PotVar0006338,PotVar0006356,solcap_snp_c1_3933,solcap_snp_c1_3936,solcap_snp_c1_3939,solcap_snp_c1_3945,solcap_snp_c2_12210,solcap_snp_c2_12078,solcap_snp_c1_3848,solcap_snp_c1_3850,solcap_snp_c1_3851,solcap_snp_c1_3852,solcap_snp_c1_3853,solcap_snp_c1_3854,solcap_snp_c2_31805,solcap_snp_c2_31857,solcap_snp_c2_31779,solcap_snp_c1_9563,solcap_snp_c2_31802,solcap_snp_c2_31804,solcap_snp_c1_9571,solcap_snp_c1_9573,solcap_snp_c2_31820,solcap_snp_c2_31821,solcap_snp_c1_9587,solcap_snp_c2_31824,solcap_snp_c2_31828,solcap_snp_c2_31836,solcap_snp_c2_31850,solcap_snp_c2_20065,solcap_snp_c2_19958,solcap_snp_c1_6263,solcap_snp_c2_19968,solcap_snp_c2_19975,solcap_snp_c2_19976,solcap_snp_c2_19984,solcap_snp_c1_6278,solcap_snp_c2_20001,solcap_snp_c2_20005,PotVar0006395,solcap_snp_c2_20028,solcap_snp_c2_20030,solcap_snp_c2_20032,solcap_snp_c1_6288,solcap_snp_c1_6294,solcap_snp_c2_20052,solcap_snp_c2_20053,solcap_snp_c2_17374,solcap_snp_c2_17372,solcap_snp_c2_17367,solcap_snp_c2_17356,solcap_snp_c2_47414,solcap_snp_c2_47429,solcap_snp_c2_47432,PotVar0006430,PotVar0006435,PotVar0006452,solcap_snp_c1_14089,solcap_snp_c2_47413,solcap_snp_c1_14093,solcap_snp_c2_47427,solcap_snp_c1_14094,solcap_snp_c2_53367,solcap_snp_c2_53357,solcap_snp_c2_53370,solcap_snp_c2_14274,solcap_snp_c2_14278,solcap_snp_c2_14283,PotVar0041226,PotVar0041233,solcap_snp_c2_14285,PotVar0041241,solcap_snp_c2_14288,PotVar0041271,PotVar0041300,solcap_snp_c2_14289,solcap_snp_c1_4595,solcap_snp_c1_4596,PotVar0041366,PotVar0041397,PotVar0041398,PotVar0041409,solcap_snp_c2_14306,solcap_snp_c1_4604,solcap_snp_c1_4607,solcap_snp_c1_4617,solcap_snp_c1_4622,PotVar0041560,PotVar0041585,PotVar0041586,PotVar0041588,PotVar0041618,solcap_snp_c1_4624,solcap_snp_c1_4625,solcap_snp_c2_14316,solcap_snp_c2_14330,solcap_snp_c1_4643,solcap_snp_c2_14332,solcap_snp_c2_14333,solcap_snp_c2_14365,solcap_snp_c2_14366,PotVar0041660,PotVar0041674,PotVar0041677,solcap_snp_c1_4666,solcap_snp_c1_4667,solcap_snp_c2_14397,solcap_snp_c2_14402,PotVar0041824,solcap_snp_c1_5253,solcap_snp_c1_5254,solcap_snp_c1_5295,solcap_snp_c2_16369,solcap_snp_c1_5242,PotVar0041849,PotVar0041859,PotVar0041871,PotVar0041901,PotVar0041919,PotVar0042010,PotVar0042074,solcap_snp_c2_16383,PotVar0042270,solcap_snp_c1_5267,solcap_snp_c1_5270,solcap_snp_c2_16409,solcap_snp_c1_5281,solcap_snp_c2_16412,solcap_snp_c1_5286,solcap_snp_c2_16424,PotVar0042350,PotVar0042357,PotVar0042358,PotVar0042403,PotVar0042444,PotVar0042445,solcap_snp_c2_16425,PotVar0042489,solcap_snp_c2_16431,solcap_snp_c2_16441,solcap_snp_c1_5299,solcap_snp_c2_16444,solcap_snp_c2_16466,solcap_snp_c2_16468,solcap_snp_c2_16470,solcap_snp_c2_16479,solcap_snp_c1_5346,PotVar0042497,PotVar0042582,PotVar0042607,PotVar0042709,PotVar0042710,PotVar0042723,PotVar0042755,PotVar0042756,solcap_snp_c1_5355,solcap_snp_c2_16530,solcap_snp_c2_52792,PotVar0110417,PotVar0110407,PotVar0110391,PotVar0110374,solcap_snp_c2_56860,solcap_snp_c2_56862,solcap_snp_c1_16432,solcap_snp_c1_16435,solcap_snp_c2_2431,solcap_snp_c2_2509,solcap_snp_c1_568,solcap_snp_c1_573,PotVar0110364,PotVar0110331,PotVar0110307,PotVar0110305,PotVar0110247,solcap_snp_c2_2291,solcap_snp_c1_593,solcap_snp_c1_594,solcap_snp_c2_2307,solcap_snp_c1_630,solcap_snp_c1_636,solcap_snp_c1_641,solcap_snp_c2_56593,solcap_snp_c2_57526,solcap_snp_c2_57525,PotVar0028699,PotVar0028711,PotVar0028728,PotVar0028742,PotVar0028758,solcap_snp_c2_2400,solcap_snp_c2_2418,solcap_snp_c2_2421,solcap_snp_c2_2423,PotVar0028811,PotVar0028819,PotVar0028830,solcap_snp_c2_2450,solcap_snp_c1_698,solcap_snp_c1_700,solcap_snp_c2_2451,PotVar0028851,PotVar0028895,PotVar0028899,solcap_snp_c1_705,solcap_snp_c1_706,solcap_snp_c2_2463,solcap_snp_c2_2464,solcap_snp_c2_2466,solcap_snp_c2_2467,solcap_snp_c1_711,solcap_snp_c2_2487,solcap_snp_c2_2494,solcap_snp_c2_2497,PotVar0028949,solcap_snp_c2_2505,solcap_snp_c2_2506,PotVar0028973,solcap_snp_c2_2507,PotVar0029025,solcap_snp_c1_730,solcap_snp_c2_2538,solcap_snp_c2_2551,solcap_snp_c1_749,solcap_snp_c1_758,solcap_snp_c2_2565,solcap_snp_c2_2567,solcap_snp_c2_2571,solcap_snp_c1_543,solcap_snp_c2_2201,solcap_snp_c1_555,solcap_snp_c2_2213,solcap_snp_c2_2215,solcap_snp_c1_565,solcap_snp_c2_2220,solcap_snp_c2_2225,solcap_snp_c2_2251,solcap_snp_c2_2254,PotVar0029105,PotVar0029118,PotVar0029119,PotVar0029143,PotVar0029221,solcap_snp_c2_2273,solcap_snp_c1_590,solcap_snp_c1_601,solcap_snp_c2_2299,solcap_snp_c1_620,solcap_snp_c2_2308,solcap_snp_c2_2315,PotVar0029324,PotVar0029332,PotVar0029355,PotVar0029356,PotVar0029382,solcap_snp_c2_2358,solcap_snp_c2_2360,solcap_snp_c2_2364,solcap_snp_c2_2368,solcap_snp_c1_652,solcap_snp_c1_659,solcap_snp_c2_2378,solcap_snp_c2_2384,solcap_snp_c2_50489,solcap_snp_c1_14853,solcap_snp_c2_50486,solcap_snp_c2_50485,solcap_snp_c2_50483,solcap_snp_c2_50502,solcap_snp_c2_54547,solcap_snp_c1_15872,solcap_snp_c2_7187,solcap_snp_c2_7195,solcap_snp_c2_7233,solcap_snp_c2_7007,solcap_snp_c1_2459,solcap_snp_c1_2484,solcap_snp_c2_7094,solcap_snp_c2_7106,PotVar0096828,PotVar0096812,PotVar0096805,solcap_snp_c1_2501,solcap_snp_c2_7193,PotVar0096799,PotVar0096798,PotVar0096785,PotVar0096784,PotVar0096775,PotVar0096772,PotVar0096770,PotVar0096767,solcap_snp_c2_7208,solcap_snp_c1_2515,PotVar0096708,PotVar0096706,PotVar0096681,PotVar0096648,PotVar0096646,PotVar0096625,solcap_snp_c1_2519,solcap_snp_c1_2520,solcap_snp_c2_7241,solcap_snp_c2_7242,solcap_snp_c2_7246,solcap_snp_c1_2531,solcap_snp_c2_7264,solcap_snp_c2_7267,solcap_snp_c2_7269,solcap_snp_c2_7279,PotVar0049790,PotVar0049834,PotVar0049883,PotVar0049885,PotVar0049886,solcap_snp_c1_2540,solcap_snp_c2_7290,solcap_snp_c1_2551,solcap_snp_c2_7306,solcap_snp_c2_7308,PotVar0049910,PotVar0049914,PotVar0049919,PotVar0049923,solcap_snp_c2_7310,solcap_snp_c2_7328,solcap_snp_c2_7331,solcap_snp_c2_7333,solcap_snp_c1_2562,solcap_snp_c2_7344,solcap_snp_c2_6984,solcap_snp_c2_6990,solcap_snp_c2_6995,solcap_snp_c2_6997,solcap_snp_c2_6998,solcap_snp_c1_2455,solcap_snp_c1_2458,solcap_snp_c2_7002,solcap_snp_c2_7009,solcap_snp_c2_7012,PotVar0049951,PotVar0049974,PotVar0049976,PotVar0049982,PotVar0049988,PotVar0050009,solcap_snp_c1_2464,PotVar0050015,PotVar0050023,PotVar0050024,PotVar0050056,solcap_snp_c2_7028,solcap_snp_c1_2466,solcap_snp_c1_2468,solcap_snp_c2_7048,solcap_snp_c2_7053,solcap_snp_c2_7056,solcap_snp_c2_7059,solcap_snp_c2_7061,solcap_snp_c1_2475,solcap_snp_c2_7068,solcap_snp_c1_1853,solcap_snp_c2_5108,PotVar0050114,PotVar0050116,PotVar0050133,PotVar0050140,solcap_snp_c1_1847,solcap_snp_c2_5102,solcap_snp_c2_5091,solcap_snp_c1_1838,solcap_snp_c1_1837,solcap_snp_c2_5078,solcap_snp_c2_5077,PotVar0050201,PotVar0050206,PotVar0050277,PotVar0050306,PotVar0050316,solcap_snp_c2_5076,solcap_snp_c2_5039,PotVar0050375,PotVar0050401,PotVar0050405,PotVar0050406,PotVar0050414,PotVar0050415,PotVar0050432,PotVar0050459,PotVar0050483,PotVar0050484,solcap_snp_c2_5030,PotVar0050524,PotVar0050545,PotVar0050569,PotVar0050579,PotVar0050584,PotVar0050585,PotVar0050601,PotVar0050638,solcap_snp_c2_5009,solcap_snp_c2_9728,solcap_snp_c2_9727,solcap_snp_c2_9726,solcap_snp_c2_9724,solcap_snp_c2_9723,solcap_snp_c1_3227,solcap_snp_c2_9722,solcap_snp_c1_3221,solcap_snp_c1_3210,solcap_snp_c1_3204,PotVar0050641,solcap_snp_c1_3306,PotVar0050685,PotVar0050687,PotVar0050696,PotVar0050773,PotVar0050785,PotVar0050787,PotVar0050793,solcap_snp_c2_9993,solcap_snp_c2_9988,PotVar0050814,PotVar0050829,PotVar0050855,PotVar0050864,solcap_snp_c2_9957,solcap_snp_c2_9930,solcap_snp_c2_9925,solcap_snp_c2_9922,solcap_snp_c2_9921,solcap_snp_c2_9917,solcap_snp_c2_9892,solcap_snp_c2_9878,solcap_snp_c1_3281,solcap_snp_c2_9864,PotVar0061273,PotVar0061259,PotVar0061254,PotVar0061252,PotVar0061244,PotVar0061243,PotVar0061225,PotVar0061224,PotVar0061206,PotVar0061197,PotVar0061193,PotVar0061187,PotVar0061167,PotVar0061153,PotVar0061150,PotVar0061136,PotVar0061123,PotVar0061119,PotVar0061106,PotVar0061104,solcap_snp_c2_9855,solcap_snp_c1_3278,solcap_snp_c1_3275,solcap_snp_c1_3273,solcap_snp_c2_9830,solcap_snp_c2_9825,solcap_snp_c2_9815,solcap_snp_c2_9812,solcap_snp_c1_3255,PotVar0061044,solcap_snp_c2_9808,PotVar0061043,PotVar0061037,PotVar0060988,PotVar0060978,PotVar0060977,solcap_snp_c2_9798,solcap_snp_c2_9791,solcap_snp_c2_9767,solcap_snp_c2_9765,solcap_snp_c2_9762,solcap_snp_c2_9755,PotVar0060961,PotVar0060952,PotVar0060922,PotVar0060913,PotVar0060863,PotVar0060841,solcap_snp_c1_3241,solcap_snp_c1_3234,solcap_snp_c1_3199,solcap_snp_c2_9976,solcap_snp_c1_3268,solcap_snp_c2_9742,PotVar0060753,PotVar0060740,PotVar0060697,PotVar0060695,solcap_snp_c2_47357,PotVar0060678,PotVar0060676,PotVar0060672,PotVar0060667,solcap_snp_c2_47378,solcap_snp_c2_47366,solcap_snp_c1_15588,solcap_snp_c2_53460,solcap_snp_c2_53455,solcap_snp_c2_53448,solcap_snp_c2_53443,solcap_snp_c2_53420,solcap_snp_c2_53415,solcap_snp_c2_53463,solcap_snp_c2_53462,solcap_snp_c2_51680,solcap_snp_c2_51689,solcap_snp_c1_15123,solcap_snp_c2_57373,solcap_snp_c2_57378,solcap_snp_c2_4896,solcap_snp_c1_1603,solcap_snp_c1_1705,solcap_snp_c2_4694,solcap_snp_c2_4754,solcap_snp_c2_4755,solcap_snp_c2_4799,solcap_snp_c1_1638,solcap_snp_c1_1645,solcap_snp_c1_1653,solcap_snp_c2_4816,solcap_snp_c2_4835,solcap_snp_c2_4840,solcap_snp_c1_1683,solcap_snp_c2_4844,solcap_snp_c2_4845,solcap_snp_c2_4852,solcap_snp_c1_1693,solcap_snp_c2_4860,solcap_snp_c2_4864,solcap_snp_c2_4875,solcap_snp_c2_4883,solcap_snp_c2_4884,solcap_snp_c2_4885,solcap_snp_c2_4898,solcap_snp_c2_4904,solcap_snp_c2_4905,solcap_snp_c2_4906,solcap_snp_c2_4907,solcap_snp_c2_4908,solcap_snp_c2_4909,solcap_snp_c2_4910,PotVar0035136,PotVar0035137,PotVar0035152,PotVar0035162,PotVar0035164,PotVar0035238,PotVar0035248,PotVar0035261,PotVar0035273,solcap_snp_c2_4920,solcap_snp_c1_1724,solcap_snp_c2_4930,solcap_snp_c1_1737,solcap_snp_c2_4939,solcap_snp_c2_4943,solcap_snp_c1_1748,solcap_snp_c2_4596,solcap_snp_c2_4601,solcap_snp_c2_4602,solcap_snp_c2_4604,solcap_snp_c2_4605,solcap_snp_c2_4608,solcap_snp_c2_4609,solcap_snp_c2_4614,solcap_snp_c2_4618,solcap_snp_c2_4625,solcap_snp_c2_4627,solcap_snp_c2_4647,solcap_snp_c1_1591,solcap_snp_c2_4655,PotVar0035301,PotVar0035378,PotVar0035379,PotVar0035451,PotVar0035470,PotVar0035543,PotVar0035546,solcap_snp_c2_4661,solcap_snp_c2_4664,solcap_snp_c2_4666,solcap_snp_c2_4678,solcap_snp_c2_4704,solcap_snp_c2_4705,solcap_snp_c2_4706,solcap_snp_c2_4707,solcap_snp_c2_4708,solcap_snp_c2_4709,solcap_snp_c2_4710,solcap_snp_c2_4711,solcap_snp_c2_4715,solcap_snp_c2_4719,solcap_snp_c1_1599,solcap_snp_c2_4732,solcap_snp_c2_4739,solcap_snp_c2_36561,solcap_snp_c2_36562,solcap_snp_c2_36571,PotVar0035572,solcap_snp_c2_36577,PotVar0035595,PotVar0035693,solcap_snp_c2_36494,solcap_snp_c2_36495,solcap_snp_c1_10893,PotVar0035739,PotVar0035746,PotVar0035753,PotVar0035758,solcap_snp_c2_36548,PotVar0035827,solcap_snp_c2_36554,solcap_snp_c1_10367,solcap_snp_c2_34548,solcap_snp_c2_34547,PotVar0035850,PotVar0035852,solcap_snp_c2_34537,solcap_snp_c2_34516,solcap_snp_c2_34513,solcap_snp_c2_34494,solcap_snp_c2_34490,solcap_snp_c1_10354,PotVar0035955,PotVar0035993,PotVar0036014,PotVar0036054,PotVar0036057,PotVar0036058,PotVar0036085,solcap_snp_c2_34478,PotVar0036142,PotVar0036149,PotVar0036150,PotVar0036191,solcap_snp_c2_25,solcap_snp_c2_35,PotVar0126645,solcap_snp_c2_46446,PotVar0126769,PotVar0126772,PotVar0126912,PotVar0126918,PotVar0126969,PotVar0126993,PotVar0127016,PotVar0127022,PotVar0127023,PotVar0127026,PotVar0127038,PotVar0127072,solcap_snp_c2_13414,solcap_snp_c1_4298,solcap_snp_c2_46448,solcap_snp_c2_53098,solcap_snp_c2_53090,solcap_snp_c2_53077,solcap_snp_c2_53075,solcap_snp_c2_53068,solcap_snp_c2_53091,solcap_snp_c2_42948,solcap_snp_c2_42946,solcap_snp_c2_42943,solcap_snp_c2_49933,solcap_snp_c2_49925,solcap_snp_c2_49918,solcap_snp_c2_49917,solcap_snp_c2_49911,solcap_snp_c2_49910,PotVar0124405,PotVar0124463,PotVar0124464,PotVar0124515,PotVar0124534,PotVar0124552,PotVar0124617,PotVar0124628,solcap_snp_c2_49906,solcap_snp_c2_49905,solcap_snp_c2_49897,solcap_snp_c2_14804,solcap_snp_c2_14839,solcap_snp_c2_14914,solcap_snp_c2_14707,solcap_snp_c2_14708,solcap_snp_c2_14709,solcap_snp_c1_4796,solcap_snp_c2_14722,solcap_snp_c2_14730,solcap_snp_c2_14731,PotVar0111067,PotVar0110983,PotVar0110922,PotVar0110909,PotVar0110897,solcap_snp_c2_14733,solcap_snp_c2_14738,solcap_snp_c2_14746,solcap_snp_c1_4799,solcap_snp_c2_14760,solcap_snp_c2_14761,solcap_snp_c2_14762,solcap_snp_c2_14763,solcap_snp_c2_14764,PotVar0099346,PotVar0099436,PotVar0099437,PotVar0099497,solcap_snp_c2_14769,PotVar0099535,PotVar0099537,PotVar0099548,solcap_snp_c2_14779,solcap_snp_c1_4802,solcap_snp_c1_4803,solcap_snp_c2_14809,solcap_snp_c2_14827,PotVar0099575,PotVar0099578,PotVar0099579,PotVar0099592,PotVar0099599,solcap_snp_c2_14841,PotVar0099653,PotVar0099669,PotVar0099686,PotVar0099699,PotVar0099733,PotVar0099751,PotVar0099774,PotVar0099779,PotVar0099782,solcap_snp_c1_4812,solcap_snp_c2_14903,solcap_snp_c2_37820,PotVar0099829,PotVar0099836,PotVar0099861,PotVar0099862,PotVar0099883,PotVar0099900,PotVar0100004,solcap_snp_c1_11288,solcap_snp_c2_37794,solcap_snp_c1_11308,solcap_snp_c2_37850,solcap_snp_c2_37816,solcap_snp_c1_11290,PotVar0122422,PotVar0122409,PotVar0122392,PotVar0122389,PotVar0122388,PotVar0122386,PotVar0122353,solcap_snp_c1_9428,solcap_snp_c1_9430,solcap_snp_c2_31041,solcap_snp_c2_31042,solcap_snp_c2_54344,solcap_snp_c2_30983,solcap_snp_c1_9413,solcap_snp_c2_30973,solcap_snp_c1_9406,solcap_snp_c2_30963,solcap_snp_c2_30961,solcap_snp_c1_9397,solcap_snp_c1_9392,solcap_snp_c2_30960,solcap_snp_c2_30958,solcap_snp_c2_30957,solcap_snp_c2_30956,solcap_snp_c2_30955,solcap_snp_c1_9386,solcap_snp_c2_31066,solcap_snp_c1_9401,solcap_snp_c1_9385,D_locus_(DFR)_A_LG02,D_locus_(DFR)_C_LG02,D_locus_(DFR)_D_LG02,D_locus_(DFR)_G_LG02,D_locus_(DFR)_H_LG02,D_locus_(DFR)_I_LG02,solcap_snp_c2_20441,solcap_snp_c2_20440,solcap_snp_c1_6461,solcap_snp_c2_4366,solcap_snp_c2_4372,solcap_snp_c2_4377,solcap_snp_c2_4378,solcap_snp_c1_1504,solcap_snp_c2_56617,solcap_snp_c1_16379,solcap_snp_c2_56618,PotVar0032526,PotVar0032521,solcap_snp_c2_4347,solcap_snp_c2_4349,PotVar0032442,solcap_snp_c2_4350,PotVar0032432,PotVar0032402,PotVar0032347,PotVar0032297,PotVar0032210,solcap_snp_c2_4353,PotVar0032158,PotVar0032117,solcap_snp_c2_4354,PotVar0032114,solcap_snp_c2_4355,solcap_snp_c2_4358,solcap_snp_c2_4360,solcap_snp_c1_1502,solcap_snp_c1_1503,solcap_snp_c2_57190,solcap_snp_c2_48725,solcap_snp_c2_48734,solcap_snp_c2_48735,solcap_snp_c2_11584,solcap_snp_c1_3750,solcap_snp_c2_11588,solcap_snp_c2_11590,solcap_snp_c1_16405,solcap_snp_c1_3753,solcap_snp_c1_3754,solcap_snp_c2_11579,solcap_snp_c1_3746,solcap_snp_c1_3747,solcap_snp_c2_32262,solcap_snp_c2_32264,solcap_snp_c1_9663,solcap_snp_c2_32274,solcap_snp_c2_4516,solcap_snp_c2_4489,solcap_snp_c2_4490,solcap_snp_c1_1539,solcap_snp_c2_4500,PotVar0075195,solcap_snp_c2_4505,solcap_snp_c2_4515,solcap_snp_c2_14690,solcap_snp_c2_14652,solcap_snp_c2_14648,solcap_snp_c1_4792,PotVar0075203,solcap_snp_c1_15874,solcap_snp_c1_15873,solcap_snp_c1_4789,solcap_snp_c2_14645,solcap_snp_c2_46465,solcap_snp_c2_46464,solcap_snp_c2_46462,solcap_snp_c2_46461,solcap_snp_c2_785,solcap_snp_c2_784,solcap_snp_c1_241,PotVar0109716,solcap_snp_c2_780,solcap_snp_c2_778,solcap_snp_c2_765,solcap_snp_c2_759,PotVar0099231,PotVar0099232,solcap_snp_c1_233,solcap_snp_c2_750,solcap_snp_c2_737,solcap_snp_c2_736,solcap_snp_c2_735,solcap_snp_c2_721,solcap_snp_c2_815,solcap_snp_c1_16173,solcap_snp_c2_806,solcap_snp_c2_805,solcap_snp_c2_804,solcap_snp_c2_803,solcap_snp_c2_32244,solcap_snp_c2_32254,solcap_snp_c2_32257,solcap_snp_c2_32239,solcap_snp_c2_32243,solcap_snp_c1_5228,solcap_snp_c2_16347,solcap_snp_c2_16348,solcap_snp_c1_5224,solcap_snp_c2_54473,solcap_snp_c2_41903,solcap_snp_c1_12296,solcap_snp_c1_12294,solcap_snp_c2_41887,solcap_snp_c2_41879,solcap_snp_c2_41874,solcap_snp_c2_41905,solcap_snp_c2_30952,solcap_snp_c2_57028,solcap_snp_c2_30945,solcap_snp_c2_30937,solcap_snp_c2_30936,solcap_snp_c2_30926,solcap_snp_c2_30915,solcap_snp_c2_30914,solcap_snp_c2_30911,solcap_snp_c2_47096,solcap_snp_c2_2940,solcap_snp_c2_2943,solcap_snp_c2_2946,solcap_snp_c2_2947,solcap_snp_c2_49074,solcap_snp_c2_49068,PotVar0054564,PotVar0054559,PotVar0054547,PotVar0054527,solcap_snp_c2_41128,PotVar0054490,solcap_snp_c2_41124,solcap_snp_c2_41123,solcap_snp_c2_41120,solcap_snp_c1_15975,solcap_snp_c1_15973,solcap_snp_c2_54863,solcap_snp_c1_9120,solcap_snp_c2_30156,solcap_snp_c2_30158,solcap_snp_c2_30160,solcap_snp_c2_30161,solcap_snp_c2_30162,solcap_snp_c2_30164,solcap_snp_c2_47765,solcap_snp_c1_14142,solcap_snp_c2_55863,solcap_snp_c2_17419,solcap_snp_c2_17387,solcap_snp_c2_17400,solcap_snp_c1_5732,solcap_snp_c2_17415,solcap_snp_c2_17427,solcap_snp_c2_17428,solcap_snp_c1_5739,solcap_snp_c1_5740,PotVar0039500,PotVar0039499,PotVar0039493,PotVar0039456,PotVar0039427,PotVar0039417,PotVar0039384,PotVar0039373,PotVar0039342,PotVar0039296,PotVar0039273,PotVar0039272,PotVar0039219,PotVar0039203,PotVar0039194,solcap_snp_c2_40336,solcap_snp_c1_11344,solcap_snp_c2_38015,PotVar0039094,PotVar0039087,PotVar0039052,PotVar0039050,solcap_snp_c2_38022,PotVar0039036,PotVar0039021,PotVar0039005,PotVar0039004,PotVar0038983,PotVar0038956,PotVar0038942,solcap_snp_c2_32462,solcap_snp_c2_32381,solcap_snp_c2_32400,solcap_snp_c2_32406,solcap_snp_c1_9695,solcap_snp_c2_32413,solcap_snp_c2_32415,solcap_snp_c2_32421,solcap_snp_c2_32425,solcap_snp_c2_32426,solcap_snp_c2_32440,solcap_snp_c1_9719,solcap_snp_c2_50885,solcap_snp_c2_50878,solcap_snp_c2_39677,solcap_snp_c1_11124,solcap_snp_c2_37254,solcap_snp_c1_11122,solcap_snp_c1_11120,solcap_snp_c2_37249,solcap_snp_c2_37248,solcap_snp_c2_37245,solcap_snp_c2_33996,PotVar0029477,PotVar0029505,PotVar0029506,PotVar0029524,PotVar0029530,PotVar0029531,PotVar0029568,solcap_snp_c2_53818,solcap_snp_c2_52630,solcap_snp_c1_6841,solcap_snp_c2_21746,solcap_snp_c2_21721,PotVar0117656,PotVar0117650,PotVar0117640,PotVar0117639,PotVar0117603,PotVar0117601,PotVar0117599,PotVar0117579,solcap_snp_c2_21682,solcap_snp_c1_6825,solcap_snp_c2_21644,solcap_snp_c1_6816,solcap_snp_c2_21745,solcap_snp_c1_16021,PotVar0088819,PotVar0088857,PotVar0088875,PotVar0088884,PotVar0088932,PotVar0088935,solcap_snp_c1_11499,solcap_snp_c1_11498,PotVar0089006,PotVar0089066,PotVar0089068,PotVar0089071,solcap_snp_c2_38704,solcap_snp_c1_11491,solcap_snp_c2_38723,solcap_snp_c2_38721,PotVar0089083,PotVar0089174,PotVar0089232,PotVar0089235,PotVar0089284,PotVar0089300,PotVar0089324,PotVar0089338,PotVar0089350,solcap_snp_c1_9356,solcap_snp_c2_30878,solcap_snp_c2_56640,solcap_snp_c2_45380,solcap_snp_c2_45307,solcap_snp_c2_45310,PotVar0124341,PotVar0124339,PotVar0124308,PotVar0124264,PotVar0124248,solcap_snp_c2_45322,solcap_snp_c2_45323,solcap_snp_c1_13459,solcap_snp_c1_13465,solcap_snp_c2_54094,PotVar0124145,PotVar0124132,PotVar0124113,PotVar0124112,PotVar0124100,solcap_snp_c1_12320,solcap_snp_c1_12339,solcap_snp_c1_12345,solcap_snp_c1_12354,PotVar0123993,PotVar0123980,PotVar0123939,solcap_snp_c2_41980,PotVar0123873,PotVar0123847,PotVar0123834,PotVar0123826,PotVar0123791,solcap_snp_c1_12330,solcap_snp_c2_42059,solcap_snp_c2_38942,solcap_snp_c2_38941,solcap_snp_c2_38939,solcap_snp_c2_38936,solcap_snp_c2_38930,solcap_snp_c1_11556,solcap_snp_c2_52135,solcap_snp_c1_15213,solcap_snp_c2_38955,solcap_snp_c2_38953,solcap_snp_c2_38952,solcap_snp_c2_51602,solcap_snp_c2_51605,solcap_snp_c1_13769,solcap_snp_c2_19670,PotVar0062831,PotVar0062825,PotVar0062811,PotVar0062786,solcap_snp_c2_19692,PotVar0062783,PotVar0062762,PotVar0062655,PotVar0062640,solcap_snp_c2_15789,solcap_snp_c2_15786,solcap_snp_c1_5091,solcap_snp_c1_5088,solcap_snp_c2_15749,solcap_snp_c2_15857,solcap_snp_c2_48239,solcap_snp_c2_48238,solcap_snp_c2_48237,solcap_snp_c1_14280,solcap_snp_c2_48198,solcap_snp_c2_48195,solcap_snp_c2_39155,PotVar0062569,PotVar0062559,PotVar0062518,PotVar0062504,PotVar0062483,solcap_snp_c2_39107,solcap_snp_c1_11580,solcap_snp_c2_51111,solcap_snp_c2_51113,solcap_snp_c2_51115,PotVar0062472,PotVar0062469,PotVar0062467,PotVar0062448,PotVar0062438,PotVar0062340,PotVar0062335,solcap_snp_c1_14983,PotVar0062277,PotVar0062276,PotVar0062269,PotVar0062268,PotVar0062252,PotVar0062231,solcap_snp_c2_51109,PotVar0062142,PotVar0062136,PotVar0062114,PotVar0062112,PotVar0062085,PotVar0062077,PotVar0062046,PotVar0062004,solcap_snp_c2_534,solcap_snp_c1_13919,solcap_snp_c2_46903,solcap_snp_c2_46904,solcap_snp_c2_46906,solcap_snp_c1_13929,solcap_snp_c2_46908,solcap_snp_c2_46909,solcap_snp_c1_13910,solcap_snp_c2_46885,solcap_snp_c2_46887,solcap_snp_c2_46890,solcap_snp_c1_13913,solcap_snp_c2_46898,solcap_snp_c2_56498,solcap_snp_c1_7439,solcap_snp_c2_23206,PotVar0082561,PotVar0082538,PotVar0082531,PotVar0082517,PotVar0082493,solcap_snp_c1_7412,solcap_snp_c1_7430,solcap_snp_c2_23139,PotVar0082485,PotVar0082484,PotVar0082446,PotVar0082429,PotVar0082380,PotVar0082331,PotVar0082295,solcap_snp_c2_23170,PotVar0082263,PotVar0082241,PotVar0082228,PotVar0082226,PotVar0082195,PotVar0082191,PotVar0082177,solcap_snp_c2_23178,solcap_snp_c2_23180,solcap_snp_c2_23188,solcap_snp_c2_23192,PotVar0094115,PotVar0094132,PotVar0094218,PotVar0094229,PotVar0094234,PotVar0094237,PotVar0094265,PotVar0094274,PotVar0094276,solcap_snp_c2_41495,PotVar0094348,PotVar0094354,PotVar0094355,PotVar0094361,PotVar0094371,PotVar0094383,PotVar0094411,PotVar0094414,PotVar0094459,PotVar0094475,solcap_snp_c2_41534,solcap_snp_c2_41541,solcap_snp_c2_41551,solcap_snp_c1_13236,PotVar0094535,PotVar0094537,PotVar0094539,PotVar0094548,PotVar0094573,PotVar0094582,solcap_snp_c1_13233,PotVar0094614,PotVar0094620,solcap_snp_c2_39191,PotVar0111703,PotVar0111837,PotVar0111850,PotVar0111855,PotVar0111874,solcap_snp_c2_39178,solcap_snp_c1_11581,solcap_snp_c1_13887,solcap_snp_c2_44771,solcap_snp_c2_44774,PotVar0131512,solcap_snp_c2_44776,solcap_snp_c2_44777,solcap_snp_c2_44778,solcap_snp_c2_44768,solcap_snp_c2_13051,PotVar0120925,PotVar0120910,PotVar0120894,PotVar0120885,solcap_snp_c1_4192,solcap_snp_c2_51995,solcap_snp_c2_51998,PotVar0120822,PotVar0120820,PotVar0120706,PotVar0120697,solcap_snp_c2_52011,solcap_snp_c2_51985,solcap_snp_c2_51986,solcap_snp_c2_51990,solcap_snp_c2_48784,PotVar0037922,solcap_snp_c2_52611,PotVar0037946,PotVar0037977,PotVar0037982,PotVar0038002,PotVar0038003,PotVar0038032,PotVar0038034,PotVar0038096,PotVar0038136,solcap_snp_c2_47037,PotVar0038206,PotVar0038207,PotVar0038224,PotVar0038355,solcap_snp_c1_12287,solcap_snp_c2_41848,solcap_snp_c1_12264,solcap_snp_c1_12257,solcap_snp_c1_12251,solcap_snp_c2_41837,PotVar0038422,PotVar0038424,solcap_snp_c2_33108,PotVar0038537,PotVar0038601,PotVar0038650,PotVar0038665,PotVar0038674,solcap_snp_c2_40135,PotVar0038725,PotVar0038744,PotVar0038755,solcap_snp_c2_40155,PotVar0038759,PotVar0038760,PotVar0038849,PotVar0038869,solcap_snp_c2_40168,solcap_snp_c2_50570,solcap_snp_c2_55204,solcap_snp_c2_55199,solcap_snp_c2_50394,solcap_snp_c2_50405,PotVar0128389,PotVar0128434,solcap_snp_c2_27433,solcap_snp_c2_27437,solcap_snp_c2_17973,solcap_snp_c2_17954,solcap_snp_c2_17951,PotVar0045674,solcap_snp_c2_17938,PotVar0045713,solcap_snp_c2_17937,solcap_snp_c2_17935,solcap_snp_c2_17932,solcap_snp_c2_17930,PotVar0045735,solcap_snp_c2_17926,solcap_snp_c2_17925,PotVar0045831,PotVar0045852,PotVar0045886,PotVar0045900,solcap_snp_c2_17922,solcap_snp_c2_17921,PotVar0045944,PotVar0045967,PotVar0045981,PotVar0046023,solcap_snp_c2_17914,solcap_snp_c2_17901,solcap_snp_c2_17900,solcap_snp_c2_17899,solcap_snp_c2_17897,solcap_snp_c2_17896,solcap_snp_c2_17895,solcap_snp_c2_17887,PotVar0046065,PotVar0046109,PotVar0046178,PotVar0046179,PotVar0046211,PotVar0046221,solcap_snp_c2_17867,PotVar0046249,PotVar0046292,PotVar0046294,solcap_snp_c2_17864,PotVar0046300,solcap_snp_c2_17858,solcap_snp_c2_17816,solcap_snp_c2_17814,solcap_snp_c1_5844,solcap_snp_c2_17809,solcap_snp_c1_5837,PotVar0046364,PotVar0046416,PotVar0046418,PotVar0046427,PotVar0046462,solcap_snp_c1_5881,solcap_snp_c1_16731,PotVar0046554,PotVar0046608,PotVar0046610,PotVar0046627,PotVar0046637,PotVar0046721,PotVar0046722,PotVar0046724,PotVar0046725,PotVar0046766,PotVar0046773,PotVar0046784,PotVar0046789,PotVar0046900,PotVar0046903,PotVar0046936,PotVar0046976,PotVar0047011,PotVar0047042,PotVar0047167,solcap_snp_c2_49495,solcap_snp_c2_42244,solcap_snp_c1_12386,solcap_snp_c2_42169,solcap_snp_c2_42172,solcap_snp_c1_16170,solcap_snp_c2_55632,solcap_snp_c1_16171,solcap_snp_c1_16172,solcap_snp_c1_12373,solcap_snp_c1_12375,PotVar0116077,PotVar0116070,PotVar0115989,PotVar0115988,PotVar0115985,PotVar0115971,PotVar0115953,PotVar0115923,PotVar0115845,PotVar0115836,PotVar0115831,PotVar0115816,solcap_snp_c1_12382,solcap_snp_c2_42241,solcap_snp_c2_35210,solcap_snp_c1_10494,solcap_snp_c1_10493,solcap_snp_c1_10492,solcap_snp_c1_10491,PotVar0118943,PotVar0118945,PotVar0118964,PotVar0118971,PotVar0119003,PotVar0119007,PotVar0119013,PotVar0119036,PotVar0119053,PotVar0119058,solcap_snp_c2_35165,solcap_snp_c2_35139,solcap_snp_c2_35113,solcap_snp_c2_35147,solcap_snp_c2_52930,solcap_snp_c1_15466,PotVar0010948,PotVar0010943,PotVar0010934,PotVar0010926,PotVar0010878,PotVar0010877,PotVar0010835,PotVar0010787,solcap_snp_c2_51887,solcap_snp_c2_40610,PotVar0010677,PotVar0010676,PotVar0010664,PotVar0010618,PotVar0010608,solcap_snp_c2_53037,solcap_snp_c2_53036,solcap_snp_c2_53035,solcap_snp_c2_53034,solcap_snp_c2_53033,solcap_snp_c1_15481,solcap_snp_c1_11955,solcap_snp_c2_52724,solcap_snp_c1_15421,PotVar0010586,PotVar0010562,PotVar0010542,PotVar0010538,PotVar0010536,PotVar0010523,solcap_snp_c1_11972,solcap_snp_c1_11973,solcap_snp_c2_40636,solcap_snp_c2_40637,solcap_snp_c2_40638,PotVar0010500,PotVar0010401,PotVar0010377,solcap_snp_c2_42132,solcap_snp_c2_42133,PotVar0010353,PotVar0010345,PotVar0010288,PotVar0010278,PotVar0010270,PotVar0010209,solcap_snp_c2_42166,solcap_snp_c2_42090,solcap_snp_c2_42126,solcap_snp_c2_42127,solcap_snp_c2_42128,PotVar0010147,PotVar0010135,PotVar0010106,solcap_snp_c2_25878,solcap_snp_c2_25766,PotVar0010102,PotVar0010079,PotVar0010076,PotVar0010064,solcap_snp_c1_8091,PotVar0010012,solcap_snp_c1_8113,solcap_snp_c1_8118,PotVar0009955,PotVar0009949,PotVar0009928,PotVar0009917,PotVar0009894,PotVar0009882,solcap_snp_c1_8125,solcap_snp_c2_25896,solcap_snp_c2_25897,PotVar0009865,PotVar0009857,PotVar0009846,PotVar0009827,PotVar0009808,PotVar0009747,PotVar0009673,PotVar0009610,PotVar0009575,PotVar0009569,PotVar0009567,PotVar0009548,PotVar0009542,solcap_snp_c1_7964,PotVar0009505,PotVar0009483,PotVar0009474,PotVar0009466,PotVar0009458,PotVar0009429,PotVar0009411,PotVar0009283,PotVar0009282,PotVar0009281,solcap_snp_c1_7956,solcap_snp_c2_25143,PotVar0009178,PotVar0009171,solcap_snp_c2_25044,solcap_snp_c2_7501,solcap_snp_c2_7549,solcap_snp_c2_7555,solcap_snp_c2_7559,PotVar0090156,PotVar0090139,PotVar0090129,solcap_snp_c2_7565,solcap_snp_c2_7610,solcap_snp_c2_7631,PotVar0090078,PotVar0090074,solcap_snp_c1_2640,solcap_snp_c1_2641,PotVar0089995,solcap_snp_c2_7356,solcap_snp_c2_7358,solcap_snp_c1_2574,solcap_snp_c2_7423,solcap_snp_c2_7424,solcap_snp_c2_7426,solcap_snp_c2_7447,solcap_snp_c2_7457,solcap_snp_c1_16542,solcap_snp_c1_16540,solcap_snp_c2_22939,solcap_snp_c1_7346,solcap_snp_c1_7342,solcap_snp_c1_7341,solcap_snp_c2_22894,solcap_snp_c2_22853,PotVar0118890,PotVar0118901,PotVar0118910,PotVar0118933,solcap_snp_c1_7325,solcap_snp_c1_7337,PotVar0006681,PotVar0006684,PotVar0006700,PotVar0006735,PotVar0006752,PotVar0006793,PotVar0006803,PotVar0006863,PotVar0006893,PotVar0006898,PotVar0006916,PotVar0006925,PotVar0006947,PotVar0006948,solcap_snp_c1_8442,solcap_snp_c2_27216,PotVar0006989,PotVar0007045,PotVar0007066,PotVar0007146,solcap_snp_c2_27218,solcap_snp_c2_53595,PotVar0007181,solcap_snp_c2_53584,solcap_snp_c2_27372,solcap_snp_c2_27268,solcap_snp_c2_27270,solcap_snp_c2_27271,PotVar0001550,PotVar0001571,PotVar0001581,PotVar0001625,PotVar0001686,solcap_snp_c2_43408,PotVar0001710,PotVar0001780,PotVar0001799,PotVar0002020,solcap_snp_c2_14980,solcap_snp_c1_4847,solcap_snp_c2_15018,solcap_snp_c2_15021,solcap_snp_c1_4849,solcap_snp_c1_4850,solcap_snp_c2_15040,solcap_snp_c2_15041,solcap_snp_c2_15043,solcap_snp_c2_15044,solcap_snp_c2_15047,solcap_snp_c2_15065,solcap_snp_c1_4860,solcap_snp_c2_15070,solcap_snp_c1_4873,PotVar0002099,PotVar0002132,PotVar0002139,solcap_snp_c1_4881,solcap_snp_c2_15215,PotVar0002196,PotVar0002228,PotVar0002321,solcap_snp_c1_7871,PotVar0002416,PotVar0002433,PotVar0002440,solcap_snp_c2_24864,solcap_snp_c1_7819,solcap_snp_c2_24789,PotVar0002500,PotVar0002504,PotVar0002507,PotVar0002530,PotVar0002533,PotVar0002607,PotVar0002627,PotVar0002716,solcap_snp_c2_50057,PotVar0002770,PotVar0002819,PotVar0002861,PotVar0002892,PotVar0002908,solcap_snp_c2_47227,solcap_snp_c2_47163,solcap_snp_c2_47196,solcap_snp_c2_47199,solcap_snp_c2_47200,solcap_snp_c2_47202,solcap_snp_c1_10604,solcap_snp_c2_35810,solcap_snp_c1_10593,solcap_snp_c2_35686,solcap_snp_c2_35689,solcap_snp_c2_35690,solcap_snp_c2_35691,solcap_snp_c2_35693,solcap_snp_c2_35694,solcap_snp_c2_35695,solcap_snp_c2_35697,solcap_snp_c2_35698,solcap_snp_c2_35701,solcap_snp_c2_35705,solcap_snp_c2_35706,solcap_snp_c2_35789,PotVar0002940,PotVar0002944,solcap_snp_c1_11459,PotVar0003002,PotVar0003004,solcap_snp_c2_38555,PotVar0003033,solcap_snp_c1_5924,PotVar0003054,PotVar0003078,PotVar0003084,PotVar0003105,PotVar0003151,PotVar0003253,PotVar0003264,PotVar0003313,PotVar0003379,PotVar0003427,solcap_snp_c2_18113,solcap_snp_c1_5909,solcap_snp_c1_5908,PotVar0003442,PotVar0003444,solcap_snp_c2_18065,PotVar0003452,PotVar0003459,PotVar0003462,PotVar0003609,PotVar0003645,PotVar0003713,PotVar0003726,PotVar0003733,PotVar0003761,PotVar0003791,PotVar0003792,solcap_snp_c1_5931,solcap_snp_c2_36284,solcap_snp_c2_36264,solcap_snp_c2_36253,solcap_snp_c2_36232,solcap_snp_c2_36231,solcap_snp_c2_36228,PotVar0084551,PotVar0084554,PotVar0084556,PotVar0084566,PotVar0084575,PotVar0084579,PotVar0084580,PotVar0084603,solcap_snp_c2_43470,solcap_snp_c2_43483,PotVar0084665,PotVar0084666,PotVar0084676,PotVar0084678,PotVar0084730,PotVar0084741,PotVar0084756,PotVar0084757,solcap_snp_c1_12825,solcap_snp_c2_51390,solcap_snp_c2_51389,solcap_snp_c2_54286,solcap_snp_c2_54288,solcap_snp_c2_54290,solcap_snp_c1_15782,solcap_snp_c1_15783,solcap_snp_c2_52800,solcap_snp_c2_52806,solcap_snp_c2_52809,solcap_snp_c2_52811,solcap_snp_c2_52813,solcap_snp_c2_52815,PotVar0019184,solcap_snp_c1_5691,PotVar0019251,PotVar0019259,PotVar0019272,PotVar0019336,PotVar0019343,solcap_snp_c2_17279,solcap_snp_c1_15839,solcap_snp_c2_50372,solcap_snp_c1_14813,PotVar0019456,PotVar0019472,PotVar0019474,PotVar0019512,PotVar0019521,PotVar0019605,solcap_snp_c2_16682,solcap_snp_c2_16681,solcap_snp_c2_16680,solcap_snp_c2_16679,solcap_snp_c2_16677,solcap_snp_c1_5400,solcap_snp_c1_5388,solcap_snp_c2_16634,solcap_snp_c2_16567,solcap_snp_c1_5365,PotVar0019680,solcap_snp_c1_13059,solcap_snp_c1_13052,solcap_snp_c1_12182,solcap_snp_c2_52467,solcap_snp_c2_52470,solcap_snp_c2_52473,solcap_snp_c1_8970,solcap_snp_c1_8968,solcap_snp_c2_29450,solcap_snp_c2_29441,solcap_snp_c2_29438,solcap_snp_c2_50636,solcap_snp_c2_50635,solcap_snp_c2_53606,solcap_snp_c2_52837,solcap_snp_c2_52838,solcap_snp_c2_5263,solcap_snp_c2_5256,solcap_snp_c2_5239,solcap_snp_c2_5238,solcap_snp_c2_5234,PotVar0021474,PotVar0021454,PotVar0021445,solcap_snp_c2_5227,solcap_snp_c2_5226,solcap_snp_c1_1918,solcap_snp_c2_5300,solcap_snp_c2_5292,solcap_snp_c2_5290,solcap_snp_c2_5289,solcap_snp_c2_54674,solcap_snp_c2_5287,solcap_snp_c2_5286,solcap_snp_c2_38503,solcap_snp_c2_38504,solcap_snp_c2_38515,solcap_snp_c2_56263,solcap_snp_c2_54532,solcap_snp_c2_54530,solcap_snp_c1_15204,solcap_snp_c1_15206,solcap_snp_c2_5732,solcap_snp_c2_5742,solcap_snp_c1_7144,solcap_snp_c1_11979,solcap_snp_c1_11985,solcap_snp_c2_40739,solcap_snp_c2_35563,solcap_snp_c2_35553,solcap_snp_c2_35552,PotVar0132206,solcap_snp_c1_11196,solcap_snp_c1_11199,solcap_snp_c1_11202,solcap_snp_c2_37413,solcap_snp_c2_37414,PotVar0106441,PotVar0106434,PotVar0106421,PotVar0106413,PotVar0106359,PotVar0106354,PotVar0106345,PotVar0106337,solcap_snp_c2_37429,solcap_snp_c1_11177,solcap_snp_c1_11179,solcap_snp_c1_11186,solcap_snp_c2_37445,solcap_snp_c2_37448,solcap_snp_c2_54418,solcap_snp_c1_15829,solcap_snp_c2_54417,solcap_snp_c2_54415,solcap_snp_c1_15836,solcap_snp_c1_11840,solcap_snp_c2_39976,solcap_snp_c2_39978,solcap_snp_c2_39979,solcap_snp_c1_11842,solcap_snp_c1_11846,solcap_snp_c1_3346,solcap_snp_c1_3336,solcap_snp_c2_10088,solcap_snp_c1_3347,solcap_snp_c1_3348,solcap_snp_c1_10725,solcap_snp_c1_10726,solcap_snp_c1_10734,PotVar0121932,PotVar0121928,PotVar0121927,solcap_snp_c1_10737,PotVar0121921,solcap_snp_c2_36014,solcap_snp_c1_10740,solcap_snp_c2_36017,solcap_snp_c1_10743,solcap_snp_c1_16267,solcap_snp_c2_664,solcap_snp_c2_661,solcap_snp_c2_659,solcap_snp_c2_657,solcap_snp_c2_654,solcap_snp_c1_189,solcap_snp_c2_650,solcap_snp_c2_649,solcap_snp_c2_648,solcap_snp_c2_646,PotVar0019045,solcap_snp_c2_644,solcap_snp_c1_171,solcap_snp_c1_167,solcap_snp_c2_634,solcap_snp_c1_156,solcap_snp_c2_676,solcap_snp_c2_674,solcap_snp_c1_200,solcap_snp_c1_450,solcap_snp_c2_1919,solcap_snp_c1_456,solcap_snp_c2_1930,solcap_snp_c2_1933,solcap_snp_c2_1934,solcap_snp_c2_11258,solcap_snp_c2_11253,solcap_snp_c1_3647,PotVar0119336,solcap_snp_c2_11270,solcap_snp_c2_11269,solcap_snp_c2_11267,solcap_snp_c2_11262,solcap_snp_c2_11260,solcap_snp_c2_37012,solcap_snp_c2_14424,solcap_snp_c1_472,solcap_snp_c1_4779,solcap_snp_c1_4775,solcap_snp_c2_41163,solcap_snp_c1_13652,solcap_snp_c2_41066,solcap_snp_c2_41061,solcap_snp_c2_41058,solcap_snp_c2_41056,solcap_snp_c2_41071,solcap_snp_c2_51096,solcap_snp_c1_14973,solcap_snp_c2_51095,solcap_snp_c2_51091,solcap_snp_c1_14975,solcap_snp_c1_14982,solcap_snp_c2_56635,solcap_snp_c2_46405,solcap_snp_c2_56612,solcap_snp_c2_43270,solcap_snp_c2_43262,solcap_snp_c2_43260,solcap_snp_c2_43256,solcap_snp_c1_12745,solcap_snp_c2_43255,solcap_snp_c2_43253,solcap_snp_c1_12751,solcap_snp_c1_16084,solcap_snp_c2_55460,solcap_snp_c2_55461,solcap_snp_c2_55463,solcap_snp_c2_55464,PotVar0085575,PotVar0085581,PotVar0085644,PotVar0085649,solcap_snp_c2_43182,PotVar0085671,solcap_snp_c2_43165,solcap_snp_c2_43168,PotVar0085728,PotVar0085747,PotVar0085760,PotVar0085797,PotVar0085799,PotVar0085803,solcap_snp_c2_35358,solcap_snp_c2_35355,solcap_snp_c2_35354,PotVar0085809,solcap_snp_c2_35353,solcap_snp_c2_35350,solcap_snp_c1_15925,solcap_snp_c1_15926,PotVar0131423,solcap_snp_c2_54687,PotVar0131444,PotVar0131462,PotVar0131468,PotVar0094653,PotVar0094670,PotVar0094679,PotVar0094680,solcap_snp_c2_30741,PotVar0094713,PotVar0094787,PotVar0094840,PotVar0094857,PotVar0094886,PotVar0094921,PotVar0094922,solcap_snp_c2_30730,solcap_snp_c1_9292,solcap_snp_c2_30708,solcap_snp_c2_30690,solcap_snp_c2_30685,solcap_snp_c1_9268,solcap_snp_c2_30682,solcap_snp_c1_4814,solcap_snp_c2_55729,solcap_snp_c2_57012,solcap_snp_c2_49970,solcap_snp_c2_49976,solcap_snp_c1_15343,solcap_snp_c2_52495,solcap_snp_c1_15342,solcap_snp_c2_52494,solcap_snp_c1_7133,solcap_snp_c1_7139,solcap_snp_c2_36463,solcap_snp_c2_36466,solcap_snp_c1_10879,PotVar0095271,solcap_snp_c1_11350,solcap_snp_c2_38047,PotVar0095322,PotVar0095330,PotVar0095359,PotVar0095450,solcap_snp_c2_38054,PotVar0095451,PotVar0095452,PotVar0095467,PotVar0095473,solcap_snp_c2_38058,solcap_snp_c2_38068,solcap_snp_c2_48381,solcap_snp_c2_48378,PotVar0129705,PotVar0129583,solcap_snp_c1_14316,PotVar0129579,solcap_snp_c2_48371,solcap_snp_c2_48370,PotVar0129535,solcap_snp_c2_48369,solcap_snp_c2_48366,solcap_snp_c2_48365,solcap_snp_c2_48364,PotVar0129496,solcap_snp_c2_48363,PotVar0129474,PotVar0129454,solcap_snp_c2_48362,PotVar0129442,PotVar0129430,solcap_snp_c2_48360,solcap_snp_c2_48359,solcap_snp_c2_48390,solcap_snp_c2_48389,solcap_snp_c2_48386,solcap_snp_c2_48385,solcap_snp_c2_37993,solcap_snp_c1_16679,solcap_snp_c2_37989,solcap_snp_c1_11339,solcap_snp_c2_35234,solcap_snp_c2_42306,PotVar0115449,PotVar0115487,PotVar0115488,PotVar0115519,PotVar0115701,PotVar0115714,PotVar0115750,solcap_snp_c2_42312,PotVar0115783,solcap_snp_c2_24983,solcap_snp_c1_7882,solcap_snp_c2_57360,solcap_snp_c2_57354,solcap_snp_c2_57349,solcap_snp_c1_6869,solcap_snp_c1_6875,solcap_snp_c1_6850,solcap_snp_c1_6851,PotVar0068174,PotVar0068173,PotVar0068165,PotVar0068149,PotVar0068140,PotVar0068134,PotVar0068122,solcap_snp_c1_6864,solcap_snp_c2_56227,solcap_snp_c2_56223,solcap_snp_c1_9150,PotVar0068033,PotVar0067954,PotVar0067935,solcap_snp_c1_9153,solcap_snp_c1_9161,solcap_snp_c2_46592,solcap_snp_c2_45698,solcap_snp_c2_45699,solcap_snp_c2_45700,solcap_snp_c2_45701,solcap_snp_c2_45702,solcap_snp_c2_45703,solcap_snp_c2_46575,solcap_snp_c1_13847,solcap_snp_c1_13843,solcap_snp_c2_46600,solcap_snp_c2_46597,solcap_snp_c2_46604,solcap_snp_c2_46603,solcap_snp_c2_13811,solcap_snp_c1_4444,solcap_snp_c2_13821,solcap_snp_c2_13825,solcap_snp_c2_13854,solcap_snp_c2_13798,solcap_snp_c2_45507,solcap_snp_c2_45503,PotVar0070245,PotVar0070248,PotVar0070253,PotVar0070255,PotVar0070258,PotVar0070260,PotVar0070281,PotVar0070298,PotVar0070299,PotVar0070310,solcap_snp_c1_13506,solcap_snp_c2_17552,solcap_snp_c1_5766,solcap_snp_c2_20347,PotVar0113517,PotVar0113511,PotVar0113509,PotVar0113506,solcap_snp_c1_6348,PotVar0113472,PotVar0113398,PotVar0113389,PotVar0113388,solcap_snp_c1_6352,solcap_snp_c1_6355,solcap_snp_c2_20333,solcap_snp_c2_20358,solcap_snp_c1_6411,solcap_snp_c1_6427,PotVar0055403,PotVar0055399,PotVar0055394,PotVar0055393,PotVar0055392,solcap_snp_c2_20428,solcap_snp_c2_55276,solcap_snp_c2_55279,solcap_snp_c2_55280,solcap_snp_c2_55281,solcap_snp_c2_55283,solcap_snp_c2_25733,solcap_snp_c1_8079,solcap_snp_c1_8069,PotVar0055362,solcap_snp_c2_25654,solcap_snp_c2_25653,PotVar0055343,PotVar0055302,PotVar0055208,PotVar0055205,PotVar0055183,PotVar0055145,PotVar0055130,PotVar0055120,PotVar0055081,PotVar0055003,solcap_snp_c1_8059,solcap_snp_c1_8058,solcap_snp_c1_8036,solcap_snp_c2_25560,PotVar0054986,PotVar0054983,PotVar0054967,PotVar0054962,solcap_snp_c2_25662,solcap_snp_c2_25576,solcap_snp_c2_2137,solcap_snp_c2_2138,solcap_snp_c2_2143,solcap_snp_c1_526,solcap_snp_c2_57865,PotVar0042832,PotVar0042845,PotVar0042852,PotVar0042853,PotVar0042918,PotVar0042930,solcap_snp_c2_11244,solcap_snp_c1_3639,solcap_snp_c1_3638,solcap_snp_c2_11224,solcap_snp_c2_11211,solcap_snp_c2_11162,solcap_snp_c2_11147,PotVar0042948,PotVar0042968,solcap_snp_c2_29665,solcap_snp_c1_9014,solcap_snp_c2_29643,solcap_snp_c2_29639,PotVar0043137,solcap_snp_c2_54785,solcap_snp_c2_29628,solcap_snp_c2_29602,PotVar0043163,PotVar0043186,PotVar0043187,PotVar0043196,PotVar0043199,solcap_snp_c2_29513,solcap_snp_c2_29506,solcap_snp_c2_29690,solcap_snp_c2_29678,solcap_snp_c2_45896,PotVar0043210,PotVar0043211,PotVar0043238,solcap_snp_c1_13616,PotVar0043245,PotVar0043256,solcap_snp_c2_53699,solcap_snp_c2_55072,solcap_snp_c2_48529,PotVar0120189,PotVar0120191,PotVar0120195,PotVar0120242,PotVar0120252,PotVar0120279,PotVar0120301,PotVar0120314,PotVar0120323,PotVar0120373,PotVar0120416,PotVar0120444,PotVar0120452,PotVar0120480,PotVar0120484,PotVar0120487,PotVar0120488,PotVar0120489,PotVar0120531,PotVar0120553,PotVar0120554,PotVar0120555,solcap_snp_c1_6298,solcap_snp_c2_20077,solcap_snp_c2_20097,PotVar0120592,PotVar0120595,PotVar0120600,PotVar0120608,PotVar0120627,solcap_snp_c2_20113,solcap_snp_c2_20117,solcap_snp_c2_20124,solcap_snp_c2_20129,solcap_snp_c2_20135,PotVar0121654,PotVar0121693,PotVar0121802,PotVar0121803,PotVar0121869,PotVar0121873,solcap_snp_c1_6318,solcap_snp_c2_20170,solcap_snp_c2_20175,solcap_snp_c2_20178,solcap_snp_c2_20179,solcap_snp_c2_20203,solcap_snp_c2_20227,PotVar0070550,PotVar0070532,PotVar0070435,PotVar0070335,solcap_snp_c1_6332,solcap_snp_c2_20259,solcap_snp_c2_20273,solcap_snp_c2_20274,solcap_snp_c2_20282,solcap_snp_c1_13494,solcap_snp_c2_1634,PotVar0056887,PotVar0056884,PotVar0056881,solcap_snp_c2_58296,PotVar0056835,solcap_snp_c2_1616,solcap_snp_c2_1603,solcap_snp_c2_1579,solcap_snp_c2_1567,solcap_snp_c2_1556,solcap_snp_c1_378,solcap_snp_c2_1533,solcap_snp_c2_1890,PotVar0056641,PotVar0056554,PotVar0056507,PotVar0056453,PotVar0056354,PotVar0056297,PotVar0056273,PotVar0056260,PotVar0056253,PotVar0056242,PotVar0056240,PotVar0056231,solcap_snp_c1_441,PotVar0056200,solcap_snp_c1_439,PotVar0056042,PotVar0056019,PotVar0056016,PotVar0055999,PotVar0055978,solcap_snp_c1_432,PotVar0055916,PotVar0055885,PotVar0055831,PotVar0055804,PotVar0055776,PotVar0055756,PotVar0055755,solcap_snp_c2_1813,solcap_snp_c2_1791,solcap_snp_c2_1724,solcap_snp_c2_1722,solcap_snp_c2_1719,solcap_snp_c2_1718,solcap_snp_c2_1688,solcap_snp_c2_1671,PotVar0055722,PotVar0055694,PotVar0055584,PotVar0055562,PotVar0055556,solcap_snp_c2_47583,solcap_snp_c2_47510,solcap_snp_c2_47511,solcap_snp_c1_4509,solcap_snp_c2_14017,solcap_snp_c1_4542,solcap_snp_c2_14064,solcap_snp_c2_14155,PotVar0027489,PotVar0027438,solcap_snp_c1_4576,solcap_snp_c1_4577,solcap_snp_c2_14258,solcap_snp_c2_55882,solcap_snp_c2_17631,solcap_snp_c1_5794,solcap_snp_c2_57259,solcap_snp_c2_57260,solcap_snp_c2_57265,solcap_snp_c2_57254,solcap_snp_c2_57256,solcap_snp_c2_57257,solcap_snp_c2_57258,solcap_snp_c1_16513,solcap_snp_c1_16514,solcap_snp_c2_57263,solcap_snp_c1_5796,solcap_snp_c1_5812,PotVar0029727,PotVar0029733,PotVar0029748,PotVar0029766,PotVar0029778,PotVar0029784,PotVar0029786,PotVar0029816,solcap_snp_c2_17737,solcap_snp_c1_14152,solcap_snp_c1_14163,solcap_snp_c2_47862,solcap_snp_c2_47843,solcap_snp_c1_7132,solcap_snp_c2_22431,solcap_snp_c1_7076,solcap_snp_c1_7078,solcap_snp_c1_7096,PotVar0029844,PotVar0029865,PotVar0029964,PotVar0030033,solcap_snp_c2_22456,PotVar0030066,PotVar0030088,solcap_snp_c1_7112,PotVar0030120,solcap_snp_c1_7115,solcap_snp_c2_22512,solcap_snp_c2_18407,solcap_snp_c2_18409,solcap_snp_c2_18268,solcap_snp_c2_18269,solcap_snp_c2_18270,solcap_snp_c2_18271,solcap_snp_c2_18273,solcap_snp_c2_18308,PotVar0030180,PotVar0030243,PotVar0030310,PotVar0030330,PotVar0030333,PotVar0030456,PotVar0030665,solcap_snp_c1_5951,solcap_snp_c1_5955,solcap_snp_c1_5956,solcap_snp_c2_18428,solcap_snp_c2_18429,PotVar0030716,PotVar0030768,PotVar0030874,PotVar0030875,solcap_snp_c2_18457,solcap_snp_c2_18463,PotVar0122174,solcap_snp_c2_18502,solcap_snp_c2_18504,solcap_snp_c2_18506,solcap_snp_c2_18507,solcap_snp_c2_53258,solcap_snp_c1_15547,solcap_snp_c2_26474,PotVar0121139,PotVar0121169,PotVar0121201,PotVar0121292,PotVar0121309,PotVar0121310,PotVar0121328,solcap_snp_c1_8203,solcap_snp_c2_26454,PotVar0121351,PotVar0121379,PotVar0121399,PotVar0121403,PotVar0121437,PotVar0121441,PotVar0121499,PotVar0121530,solcap_snp_c2_26417,solcap_snp_c2_26403,solcap_snp_c2_26402,solcap_snp_c2_26382,solcap_snp_c1_8194,solcap_snp_c2_26375,PotVar0013203,PotVar0013238,PotVar0013242,PotVar0013245,PotVar0013317,PotVar0013322,PotVar0013333,solcap_snp_c2_26320,PotVar0013337,PotVar0013345,PotVar0013382,solcap_snp_c1_111,solcap_snp_c2_429,solcap_snp_c2_422,PotVar0013433,PotVar0013434,solcap_snp_c1_108,solcap_snp_c2_398,solcap_snp_c2_394,solcap_snp_c2_392,solcap_snp_c2_391,solcap_snp_c2_390,solcap_snp_c2_387,PotVar0013479,PotVar0013496,PotVar0013510,PotVar0013533,PotVar0013544,PotVar0013571,PotVar0013573,PotVar0013592,PotVar0013631,PotVar0013695,solcap_snp_c2_340,solcap_snp_c2_328,PotVar0013805,PotVar0013816,solcap_snp_c2_326,PotVar0013850,PotVar0013851,solcap_snp_c2_324,solcap_snp_c1_97,PotVar0013866,PotVar0013867,PotVar0013870,solcap_snp_c2_323,PotVar0013873,solcap_snp_c2_322,solcap_snp_c2_317,solcap_snp_c2_314,solcap_snp_c2_312,PotVar0013907,solcap_snp_c1_95,solcap_snp_c2_304,solcap_snp_c2_298,solcap_snp_c2_293,solcap_snp_c2_289,solcap_snp_c2_283,solcap_snp_c2_282,solcap_snp_c2_268,solcap_snp_c2_265,solcap_snp_c2_262,solcap_snp_c2_261,solcap_snp_c2_257,solcap_snp_c2_255,solcap_snp_c2_245,solcap_snp_c2_244,solcap_snp_c2_242,PotVar0014012,PotVar0014025,solcap_snp_c2_235,solcap_snp_c1_87,solcap_snp_c2_205,solcap_snp_c2_203,solcap_snp_c2_202,solcap_snp_c2_200,solcap_snp_c2_199,solcap_snp_c2_196,solcap_snp_c2_185,solcap_snp_c1_77,solcap_snp_c1_75,solcap_snp_c2_178,solcap_snp_c1_73,solcap_snp_c2_161,solcap_snp_c2_160,solcap_snp_c2_158,solcap_snp_c2_149,solcap_snp_c2_148,solcap_snp_c2_147,solcap_snp_c2_137,solcap_snp_c2_133,solcap_snp_c2_126,solcap_snp_c2_117,solcap_snp_c2_113,solcap_snp_c1_58,solcap_snp_c2_109,solcap_snp_c2_107,PotVar0014064,solcap_snp_c2_99,PotVar0014072,solcap_snp_c1_52,solcap_snp_c1_51,solcap_snp_c2_92,solcap_snp_c1_42,solcap_snp_c1_41,solcap_snp_c1_39,solcap_snp_c1_36,solcap_snp_c2_86,solcap_snp_c1_26,solcap_snp_c2_626,solcap_snp_c2_625,solcap_snp_c2_624,solcap_snp_c2_622,solcap_snp_c2_617,solcap_snp_c2_616,solcap_snp_c1_151,solcap_snp_c2_610,solcap_snp_c2_608,solcap_snp_c2_606,solcap_snp_c2_603,solcap_snp_c2_601,solcap_snp_c2_600,solcap_snp_c2_599,solcap_snp_c2_598,solcap_snp_c1_146,solcap_snp_c1_140,solcap_snp_c2_597,solcap_snp_c2_596,solcap_snp_c2_595,solcap_snp_c1_137,solcap_snp_c2_589,PotVar0014097,PotVar0014106,PotVar0014120,solcap_snp_c2_574,solcap_snp_c2_573,solcap_snp_c2_570,solcap_snp_c2_569,solcap_snp_c2_561,solcap_snp_c2_556,solcap_snp_c2_555,solcap_snp_c1_126,solcap_snp_c2_542,solcap_snp_c2_541,solcap_snp_c2_540,solcap_snp_c2_538,solcap_snp_c2_533,solcap_snp_c2_381,solcap_snp_c2_357,solcap_snp_c2_190,solcap_snp_c2_164,solcap_snp_c2_163,solcap_snp_c2_130,solcap_snp_c2_115,PotVar0014151,PotVar0014217,solcap_snp_c2_243,solcap_snp_c2_536,solcap_snp_c1_131,solcap_snp_c2_578,solcap_snp_c2_55684,solcap_snp_c2_55664,solcap_snp_c2_55675,solcap_snp_c2_55677,solcap_snp_c2_9553,solcap_snp_c2_9557,solcap_snp_c2_9611,solcap_snp_c2_9627,solcap_snp_c2_9629,PotVar0021209,solcap_snp_c1_3189,solcap_snp_c1_3191,solcap_snp_c2_9530,solcap_snp_c2_9537,solcap_snp_c2_9551,solcap_snp_c2_9560,solcap_snp_c2_9562,solcap_snp_c2_9563,solcap_snp_c2_9565,solcap_snp_c2_9566,solcap_snp_c2_9569,solcap_snp_c2_9571,solcap_snp_c2_9577,solcap_snp_c2_9578,solcap_snp_c2_9580,solcap_snp_c2_9582,solcap_snp_c2_9590,solcap_snp_c2_9593,solcap_snp_c2_9594,solcap_snp_c2_9600,solcap_snp_c2_9602,solcap_snp_c2_9604,solcap_snp_c2_9630,PotVar0021187,PotVar0021182,PotVar0021180,PotVar0021166,PotVar0021132,PotVar0021131,PotVar0021118,PotVar0021098,PotVar0021026,PotVar0021019,PotVar0020971,PotVar0020948,solcap_snp_c2_9497,solcap_snp_c2_9498,solcap_snp_c2_9531,PotVar0020808,PotVar0020788,PotVar0020782,PotVar0020716,PotVar0020656,PotVar0020566,PotVar0020552,PotVar0020543,PotVar0020507,PotVar0020485,PotVar0020457,PotVar0020451,PotVar0020426,PotVar0020413,PotVar0020407,PotVar0020402,solcap_snp_c2_40435,PotVar0020306,PotVar0020249,PotVar0020225,PotVar0020222,PotVar0020216,PotVar0020213,PotVar0020171,PotVar0020137,solcap_snp_c2_49090,PotVar0020124,PotVar0020111,solcap_snp_c2_37139,solcap_snp_c2_37137,PotVar0020079,PotVar0020074,solcap_snp_c2_37136,solcap_snp_c2_37123,solcap_snp_c2_37121,solcap_snp_c2_37118,PotVar0020037,PotVar0020017,PotVar0019966,PotVar0019945,solcap_snp_c2_37116,solcap_snp_c2_37115,PotVar0019908,PotVar0019900,PotVar0019891,PotVar0019861,PotVar0019827,PotVar0019800,PotVar0019773,PotVar0019703,solcap_snp_c1_16472,solcap_snp_c2_56824,PotVar0026637,solcap_snp_c2_23596,solcap_snp_c2_23601,solcap_snp_c1_7568,solcap_snp_c1_7569,solcap_snp_c1_7570,solcap_snp_c1_7571,solcap_snp_c2_23611,solcap_snp_c2_54463,solcap_snp_c2_39322,solcap_snp_c2_39287,solcap_snp_c1_11626,PotVar0105375,solcap_snp_c2_46643,solcap_snp_c2_29899,PotVar0076876,PotVar0076875,PotVar0076872,PotVar0076867,PotVar0076831,PotVar0076830,PotVar0076759,PotVar0076672,PotVar0076666,PotVar0076645,PotVar0076628,PotVar0076621,PotVar0076614,PotVar0076565,PotVar0076511,PotVar0076504,PotVar0076503,PotVar0076499,solcap_snp_c2_45927,solcap_snp_c2_45936,solcap_snp_c2_31716,solcap_snp_c2_31717,PotVar0107012,PotVar0107010,PotVar0107009,PotVar0107001,PotVar0106999,solcap_snp_c2_31719,solcap_snp_c2_31720,PotVar0106922,solcap_snp_c1_9546,PotVar0106917,PotVar0106885,PotVar0106879,PotVar0106874,PotVar0106871,PotVar0106865,PotVar0106851,PotVar0106843,solcap_snp_c2_31732,solcap_snp_c2_31733,PotVar0106834,PotVar0106828,PotVar0106766,PotVar0106745,PotVar0106736,PotVar0106663,PotVar0106655,solcap_snp_c2_7751,PotVar0100770,PotVar0100817,PotVar0100824,PotVar0100851,PotVar0100912,solcap_snp_c1_6898,solcap_snp_c2_21937,solcap_snp_c2_21936,solcap_snp_c2_21934,solcap_snp_c2_21930,PotVar0100919,PotVar0100922,PotVar0100941,PotVar0100945,PotVar0100946,PotVar0100955,PotVar0100990,PotVar0101034,PotVar0101048,PotVar0101063,PotVar0101072,solcap_snp_c2_21915,PotVar0101164,PotVar0101281,PotVar0101300,PotVar0101303,PotVar0101345,PotVar0101403,PotVar0101437,PotVar0101527,solcap_snp_c2_21875,solcap_snp_c2_21860,solcap_snp_c2_21842,solcap_snp_c1_6894,solcap_snp_c1_16353,solcap_snp_c2_55387,solcap_snp_c1_16079,solcap_snp_c1_16080,solcap_snp_c2_51637,solcap_snp_c2_51641,solcap_snp_c1_15106,solcap_snp_c1_3740,solcap_snp_c2_11571,solcap_snp_c2_11570,solcap_snp_c2_11569,solcap_snp_c2_11568,PotVar0109580,PotVar0109579,PotVar0109537,PotVar0109529,PotVar0109426,PotVar0109408,PotVar0109406,PotVar0109399,solcap_snp_c2_11534,solcap_snp_c1_3707,solcap_snp_c2_11490,solcap_snp_c2_11489,solcap_snp_c2_11488,solcap_snp_c2_11479,solcap_snp_c2_11435,solcap_snp_c2_11432,solcap_snp_c2_11425,PotVar0127735,PotVar0127732,solcap_snp_c2_11516,solcap_snp_c2_48871,solcap_snp_c2_48868,solcap_snp_c2_48864,solcap_snp_c2_48861,solcap_snp_c2_39708,solcap_snp_c1_11722,solcap_snp_c1_11709,solcap_snp_c1_11710,solcap_snp_c2_39606,solcap_snp_c2_39624,solcap_snp_c2_39590,solcap_snp_c2_39593,solcap_snp_c2_39597,PotVar0039587,PotVar0039597,PotVar0039621,solcap_snp_c2_26771,solcap_snp_c2_26773,solcap_snp_c1_8344,solcap_snp_c2_26779,solcap_snp_c2_26780,solcap_snp_c2_26790,solcap_snp_c2_26792,solcap_snp_c1_8346,solcap_snp_c1_8347,solcap_snp_c2_26793,solcap_snp_c2_26794,solcap_snp_c2_26796,solcap_snp_c2_26797,solcap_snp_c2_26799,solcap_snp_c2_26800,solcap_snp_c2_26801,solcap_snp_c2_26811,solcap_snp_c2_26812,solcap_snp_c2_26813,solcap_snp_c2_26826,solcap_snp_c2_26837,solcap_snp_c2_26842,solcap_snp_c2_26843,solcap_snp_c1_8354,solcap_snp_c2_26858,solcap_snp_c2_53784,solcap_snp_c2_53779,solcap_snp_c2_58201,solcap_snp_c2_44609,solcap_snp_c2_44620,solcap_snp_c1_16258,solcap_snp_c2_31403,solcap_snp_c2_54083,solcap_snp_c1_16643,PotVar0091958,PotVar0091961,PotVar0091972,PotVar0092092,PotVar0092132,PotVar0092146,PotVar0092188,PotVar0092202,solcap_snp_c1_11135,solcap_snp_c2_37325,solcap_snp_c2_37323,solcap_snp_c1_11132,solcap_snp_c2_51192,solcap_snp_c2_51190,PotVar0121031,PotVar0121064,PotVar0121091,PotVar0121092,solcap_snp_c2_51559,solcap_snp_c2_51560,solcap_snp_c2_51567,solcap_snp_c2_56253,solcap_snp_c2_56254,solcap_snp_c2_56255,solcap_snp_c2_56256,solcap_snp_c2_56258,solcap_snp_c2_56251,PotVar0032776,PotVar0032715,PotVar0032636,solcap_snp_c2_49853,solcap_snp_c2_49847,solcap_snp_c2_21637,solcap_snp_c1_6815,solcap_snp_c1_6814,solcap_snp_c2_29468,solcap_snp_c2_29476,PotVar0082668,solcap_snp_c1_16263,solcap_snp_c2_38247,solcap_snp_c2_38246,solcap_snp_c2_38242,solcap_snp_c2_21605,solcap_snp_c2_21595,PotVar0008090,solcap_snp_c2_48073,solcap_snp_c2_48074,PotVar0093363,solcap_snp_c2_38379,PotVar0073718,PotVar0073742,PotVar0073760,solcap_snp_c2_32912,solcap_snp_c2_32900,solcap_snp_c2_32901,solcap_snp_c2_32904,solcap_snp_c2_32905,solcap_snp_c2_32906,solcap_snp_c1_9837,solcap_snp_c2_43765,solcap_snp_c2_43763,solcap_snp_c1_12888,solcap_snp_c2_47105,solcap_snp_c2_47106,PotVar0007740,PotVar0007732,PotVar0007721,PotVar0007646,solcap_snp_c1_9476,solcap_snp_c2_31361,solcap_snp_c2_31360,solcap_snp_c2_31359,solcap_snp_c2_31358,solcap_snp_c1_9477,solcap_snp_c2_11101,solcap_snp_c2_11104,solcap_snp_c1_3616,solcap_snp_c2_11107,solcap_snp_c2_10438,solcap_snp_c2_10437,solcap_snp_c1_3436,solcap_snp_c2_10461,solcap_snp_c2_10460,solcap_snp_c2_10452,solcap_snp_c2_10449,solcap_snp_c1_3444,solcap_snp_c1_3443,PotVar0009120,solcap_snp_c2_10446,solcap_snp_c2_10443,solcap_snp_c2_10442,solcap_snp_c2_57338,solcap_snp_c1_14569,solcap_snp_c2_37598,solcap_snp_c2_37596,PotVar0014877,solcap_snp_c2_41106,PotVar0014824,PotVar0014800,solcap_snp_c2_19423,solcap_snp_c1_8367,solcap_snp_c1_8368,solcap_snp_c1_5081,solcap_snp_c2_26888,solcap_snp_c1_14039,solcap_snp_c2_33294,solcap_snp_c2_33295,solcap_snp_c1_9111,solcap_snp_c2_53249,solcap_snp_c2_43221,solcap_snp_c2_43223,solcap_snp_c2_43227,solcap_snp_c2_43229,solcap_snp_c2_43230,solcap_snp_c2_55090,solcap_snp_c2_54605,solcap_snp_c2_58004,solcap_snp_c2_56758,solcap_snp_c2_10007,solcap_snp_c1_15603,solcap_snp_c1_3319,solcap_snp_c2_10026,solcap_snp_c2_10025,solcap_snp_c1_3317,solcap_snp_c1_3316,solcap_snp_c2_10015,solcap_snp_c2_10008,solcap_snp_c2_7790,solcap_snp_c2_7791,solcap_snp_c2_7761,solcap_snp_c2_7764,solcap_snp_c2_7769,solcap_snp_c2_7773,solcap_snp_c2_7774,solcap_snp_c1_2681,solcap_snp_c1_2682,solcap_snp_c2_16247,solcap_snp_c2_16260,PotVar0009060,PotVar0009002,solcap_snp_c2_16269,solcap_snp_c1_5209,solcap_snp_c1_5420,solcap_snp_c2_16720,solcap_snp_c2_16712,solcap_snp_c2_16713,solcap_snp_c2_16718,solcap_snp_c2_16738,solcap_snp_c2_16744,solcap_snp_c1_15530,solcap_snp_c1_5430,solcap_snp_c2_48814,solcap_snp_c2_48817,solcap_snp_c2_48818,solcap_snp_c1_14442,solcap_snp_c1_16534,PotVar0076084,PotVar0076141,PotVar0076153,PotVar0076175,PotVar0076243,solcap_snp_c2_39847,solcap_snp_c2_39848,PotVar0076311,PotVar0076312,solcap_snp_c1_11791,solcap_snp_c1_6036,solcap_snp_c2_19001,solcap_snp_c1_6040,solcap_snp_c2_55711,solcap_snp_c2_55710,solcap_snp_c2_54533,PotVar0130937,solcap_snp_c2_54229,PotVar0130958,PotVar0130964,PotVar0130983,solcap_snp_c1_15760,solcap_snp_c2_1508,solcap_snp_c2_1506,solcap_snp_c2_1505,solcap_snp_c2_1499,solcap_snp_c2_48694,solcap_snp_c2_48691,solcap_snp_c2_48692,PotVar0074742,solcap_snp_c2_48693,PotVar0074766,solcap_snp_c1_14397,solcap_snp_c2_53566,solcap_snp_c2_45035,solcap_snp_c2_45034,PotVar0074876,PotVar0074928,PotVar0075063,PotVar0116393,PotVar0116182,PotVar0116179,PotVar0116167,PotVar0116154,solcap_snp_c1_15513,solcap_snp_c1_15983,solcap_snp_c1_15982,solcap_snp_c2_54887,PotVar0133248,PotVar0133117,PotVar0133115,solcap_snp_c1_15878,solcap_snp_c1_14440,solcap_snp_c1_14435,solcap_snp_c2_48810,solcap_snp_c2_48808,PotVar0088506,PotVar0088499,PotVar0088498,PotVar0088487,solcap_snp_c2_52738,solcap_snp_c2_52884,solcap_snp_c2_52887,solcap_snp_c2_52890,solcap_snp_c2_52893,solcap_snp_c2_52867,solcap_snp_c2_52866,solcap_snp_c2_43987,solcap_snp_c1_12945,solcap_snp_c2_43998,solcap_snp_c2_44000,solcap_snp_c1_10441,PotVar0084519,PotVar0084447,PotVar0084419,solcap_snp_c2_34948,PotVar0084388,PotVar0084331,solcap_snp_c2_34957,solcap_snp_c2_34958,solcap_snp_c2_54335,solcap_snp_c1_10750,PotVar0116499,PotVar0116521,solcap_snp_c1_10751,solcap_snp_c2_36031,solcap_snp_c2_36033,solcap_snp_c2_36037,solcap_snp_c1_10762,solcap_snp_c2_36045,solcap_snp_c2_36053,solcap_snp_c2_36060,solcap_snp_c2_55849,solcap_snp_c2_55854,solcap_snp_c2_39810,solcap_snp_c2_39807,solcap_snp_c2_39804,solcap_snp_c2_39802,solcap_snp_c1_11750,solcap_snp_c2_39801,solcap_snp_c2_39800,solcap_snp_c1_11758,PotVar0100544,PotVar0100538,PotVar0100536,solcap_snp_c2_51249,solcap_snp_c1_15504,solcap_snp_c2_53548,solcap_snp_c1_11363,solcap_snp_c1_11360,solcap_snp_c1_11356,solcap_snp_c1_11352,solcap_snp_c1_11391,solcap_snp_c2_38116,PotVar0099182,PotVar0099137,PotVar0099095,PotVar0099071,PotVar0098992,PotVar0098988,PotVar0098903,solcap_snp_c2_37472,solcap_snp_c1_11206,PotVar0071171,PotVar0071128,PotVar0071109,PotVar0071041,solcap_snp_c1_9769,solcap_snp_c2_32600,PotVar0070965,PotVar0070881,PotVar0070877,PotVar0070856,solcap_snp_c2_32550,solcap_snp_c2_32543,solcap_snp_c2_50004,PotVar0070686,solcap_snp_c2_39463,solcap_snp_c1_11670,solcap_snp_c2_39439,solcap_snp_c2_39441,solcap_snp_c2_39448,solcap_snp_c2_39450,solcap_snp_c2_39453,solcap_snp_c2_43736,solcap_snp_c2_43722,solcap_snp_c2_43735,solcap_snp_c2_43743,PotVar0113797,solcap_snp_c2_43748,PotVar0113894,PotVar0113911,PotVar0113919,solcap_snp_c1_11639,solcap_snp_c2_39343,PotVar0113944,PotVar0114023,solcap_snp_c2_39342,solcap_snp_c2_39341,PotVar0114035,PotVar0114036,solcap_snp_c2_42685,solcap_snp_c2_21590,solcap_snp_c2_21578,solcap_snp_c2_21577,solcap_snp_c2_21573,solcap_snp_c2_21572,PotVar0000812,PotVar0000800,PotVar0000767,PotVar0000760,PotVar0000732,solcap_snp_c1_6758,solcap_snp_c1_6750,PotVar0000619,solcap_snp_c1_6748,PotVar0000586,PotVar0000579,PotVar0000542,PotVar0000514,solcap_snp_c2_21463,solcap_snp_c2_21388,PotVar0000495,PotVar0000481,PotVar0000474,PotVar0000460,PotVar0000459,solcap_snp_c1_8328,solcap_snp_c2_26731,solcap_snp_c2_26758,solcap_snp_c2_26675,solcap_snp_c2_26688,solcap_snp_c1_8316,PotVar0123717,PotVar0123709,solcap_snp_c1_7990,solcap_snp_c2_25282,PotVar0123654,solcap_snp_c2_25283,PotVar0123635,solcap_snp_c2_25284,solcap_snp_c2_55796,solcap_snp_c2_55793,solcap_snp_c2_55791,solcap_snp_c2_55786,solcap_snp_c2_55785,solcap_snp_c2_55783,solcap_snp_c2_55782,solcap_snp_c2_55780,solcap_snp_c2_55775,PotVar0086982,PotVar0087028,PotVar0087030,solcap_snp_c1_8319,PotVar0087064,PotVar0087095,PotVar0087136,PotVar0087179,solcap_snp_c2_26740,solcap_snp_c2_26741,PotVar0087222,PotVar0087233,PotVar0087234,PotVar0087243,PotVar0087270,PotVar0087316,solcap_snp_c2_26744,solcap_snp_c2_38611,solcap_snp_c2_44640,solcap_snp_c1_13172,solcap_snp_c2_32042,PotVar0111367,PotVar0111404,PotVar0111409,PotVar0111414,PotVar0111470,PotVar0111512,PotVar0111515,PotVar0111522,solcap_snp_c2_32019,solcap_snp_c1_9613,PotVar0111531,PotVar0111553,PotVar0111558,PotVar0111582,solcap_snp_c2_32099,solcap_snp_c2_54446,solcap_snp_c1_15237,solcap_snp_c2_52206,solcap_snp_c2_52205,solcap_snp_c2_52203,solcap_snp_c2_52202,solcap_snp_c2_52196,solcap_snp_c2_52195,solcap_snp_c2_19584,PotVar0075244,PotVar0075255,PotVar0075289,PotVar0075291,PotVar0075293,PotVar0075295,PotVar0075314,PotVar0075324,PotVar0075328,solcap_snp_c1_10435,PotVar0075355,PotVar0075407,PotVar0075409,solcap_snp_c2_34876,solcap_snp_c2_34875,solcap_snp_c2_34873,solcap_snp_c2_34872,solcap_snp_c2_34868,solcap_snp_c2_34867,solcap_snp_c2_34866,solcap_snp_c2_34864,solcap_snp_c2_34863,solcap_snp_c2_34862,solcap_snp_c1_10424,solcap_snp_c2_34861,solcap_snp_c2_34819,PotVar0075516,PotVar0075526,PotVar0075528,PotVar0075588,PotVar0075591,PotVar0075682,PotVar0075687,solcap_snp_c2_34812,PotVar0075765,PotVar0075793,PotVar0075798,PotVar0075882,PotVar0075888,PotVar0075891,PotVar0075954,PotVar0076006,PotVar0076032,PotVar0076035,solcap_snp_c1_3166,solcap_snp_c2_44461,solcap_snp_c1_13085,solcap_snp_c1_13077,solcap_snp_c2_12976,solcap_snp_c1_4180,PotVar0130793,PotVar0130794,PotVar0130835,PotVar0130846,solcap_snp_c1_4178,solcap_snp_c2_12958,solcap_snp_c2_12957,solcap_snp_c2_12956,solcap_snp_c2_12955,solcap_snp_c2_12954,solcap_snp_c2_12947,solcap_snp_c2_12937,solcap_snp_c2_12936,solcap_snp_c1_4175,solcap_snp_c2_12930,solcap_snp_c2_12928,solcap_snp_c1_4172,solcap_snp_c1_4171,solcap_snp_c2_12924,solcap_snp_c2_12921,solcap_snp_c2_12913,solcap_snp_c1_4162,solcap_snp_c2_12904,solcap_snp_c2_12902,PotVar0015043,PotVar0015063,PotVar0015087,PotVar0015108,solcap_snp_c1_4140,solcap_snp_c1_4135,solcap_snp_c1_4109,PotVar0015145,PotVar0015152,PotVar0015174,PotVar0015207,PotVar0015291,PotVar0015326,solcap_snp_c1_10211,solcap_snp_c1_10168,solcap_snp_c1_10169,solcap_snp_c1_10178,solcap_snp_c2_34017,solcap_snp_c2_34019,PotVar0015370,PotVar0015456,solcap_snp_c2_34050,solcap_snp_c2_34051,solcap_snp_c1_10196,solcap_snp_c1_10202,solcap_snp_c1_13349,solcap_snp_c2_45122,solcap_snp_c2_35970,PotVar0015513,PotVar0015535,PotVar0015546,PotVar0015583,PotVar0015588,PotVar0015597,PotVar0015639,PotVar0015728,solcap_snp_c2_35959,solcap_snp_c2_35958,PotVar0015848,PotVar0015864,solcap_snp_c1_10679,solcap_snp_c1_10678,solcap_snp_c1_10677,solcap_snp_c1_10676,PotVar0015940,PotVar0015987,PotVar0015998,solcap_snp_c2_35944,solcap_snp_c1_10670,solcap_snp_c1_10669,solcap_snp_c1_10668,solcap_snp_c1_10667,solcap_snp_c1_10666,solcap_snp_c1_10715,solcap_snp_c2_35999,solcap_snp_c2_35996,solcap_snp_c2_35995,solcap_snp_c1_10713,solcap_snp_c1_10711,solcap_snp_c1_3450,solcap_snp_c2_10870,solcap_snp_c2_10867,PotVar0016123,PotVar0016129,PotVar0016132,PotVar0016137,PotVar0016140,PotVar0016172,PotVar0016173,PotVar0016176,PotVar0016177,solcap_snp_c2_10832,solcap_snp_c2_10828,PotVar0016374,PotVar0016397,PotVar0016403,PotVar0016414,solcap_snp_c2_10819,PotVar0016416,PotVar0016549,solcap_snp_c2_10802,solcap_snp_c2_10800,solcap_snp_c1_3545,solcap_snp_c2_10798,solcap_snp_c1_3544,solcap_snp_c2_10797,PotVar0016608,PotVar0016612,PotVar0016703,PotVar0016717,PotVar0016746,PotVar0016775,PotVar0016800,PotVar0016819,PotVar0016834,PotVar0016845,PotVar0016863,PotVar0016906,PotVar0017024,PotVar0017084,solcap_snp_c2_10693,PotVar0017157,PotVar0017169,PotVar0017171,PotVar0017188,solcap_snp_c2_10692,solcap_snp_c1_3522,solcap_snp_c2_10688,solcap_snp_c2_10687,solcap_snp_c2_10686,solcap_snp_c2_10683,solcap_snp_c2_10681,PotVar0017293,solcap_snp_c1_3515,solcap_snp_c1_3514,solcap_snp_c2_10660,solcap_snp_c2_10658,solcap_snp_c2_10656,solcap_snp_c2_10635,PotVar0017358,PotVar0017371,PotVar0017372,PotVar0017373,PotVar0017377,PotVar0017411,PotVar0017431,solcap_snp_c2_10626,solcap_snp_c2_10618,solcap_snp_c2_10617,solcap_snp_c1_3499,solcap_snp_c2_10616,solcap_snp_c2_10615,solcap_snp_c2_10614,solcap_snp_c2_10613,solcap_snp_c2_10612,solcap_snp_c1_3497,solcap_snp_c1_3495,solcap_snp_c1_3494,solcap_snp_c1_3484,solcap_snp_c2_10563,solcap_snp_c1_3476,solcap_snp_c2_10552,solcap_snp_c2_10548,solcap_snp_c2_10547,PotVar0017484,PotVar0017501,PotVar0017542,PotVar0017563,PotVar0017609,PotVar0017710,solcap_snp_c1_3462,solcap_snp_c1_3461,PotVar0017726,solcap_snp_c2_10545,solcap_snp_c1_3460,PotVar0017735,PotVar0017808,PotVar0017828,PotVar0017842,solcap_snp_c2_10540,solcap_snp_c1_3458,solcap_snp_c2_10523,PotVar0017868,PotVar0017894,PotVar0017902,PotVar0017908,solcap_snp_c2_23780,solcap_snp_c2_23643,solcap_snp_c2_23720,solcap_snp_c2_23728,solcap_snp_c2_23729,PotVar0048982,PotVar0048975,PotVar0048943,PotVar0048941,PotVar0048925,PotVar0048921,PotVar0048858,PotVar0048849,PotVar0048835,PotVar0048790,PotVar0048723,PotVar0048673,PotVar0048670,PotVar0048605,solcap_snp_c2_23735,solcap_snp_c2_23740,solcap_snp_c1_7621,solcap_snp_c1_7622,solcap_snp_c2_23743,PotVar0048577,PotVar0048505,PotVar0048457,solcap_snp_c1_7624,PotVar0048431,PotVar0048367,PotVar0048359,PotVar0048332,PotVar0048304,PotVar0048284,PotVar0048271,PotVar0048229,PotVar0048209,solcap_snp_c2_52277,solcap_snp_c2_52276,solcap_snp_c2_52274,solcap_snp_c2_23786,solcap_snp_c1_7633,PotVar0048171,PotVar0048148,solcap_snp_c2_23828,solcap_snp_c2_23829,solcap_snp_c2_23831,solcap_snp_c2_23832,solcap_snp_c2_23833,solcap_snp_c2_23834,solcap_snp_c2_23835,solcap_snp_c2_23836,solcap_snp_c2_23841,solcap_snp_c2_23842,solcap_snp_c2_23843,solcap_snp_c1_15684,solcap_snp_c2_40379,PotVar0048114,solcap_snp_c2_33598,solcap_snp_c2_33512,solcap_snp_c2_33515,solcap_snp_c2_33516,solcap_snp_c2_33517,solcap_snp_c2_33518,solcap_snp_c2_33519,solcap_snp_c2_33520,solcap_snp_c2_33521,solcap_snp_c2_33522,solcap_snp_c2_33535,solcap_snp_c1_10042,solcap_snp_c2_33536,solcap_snp_c2_33537,solcap_snp_c2_57149,solcap_snp_c2_52061,solcap_snp_c2_52066,solcap_snp_c2_52067,solcap_snp_c2_52069,solcap_snp_c2_52070,solcap_snp_c2_52081,PotVar0114684,PotVar0114686,PotVar0114693,PotVar0114705,PotVar0114706,solcap_snp_c2_11605,PotVar0114766,solcap_snp_c2_11766,solcap_snp_c2_11758,solcap_snp_c2_11712,solcap_snp_c2_11707,solcap_snp_c2_11696,solcap_snp_c2_11695,solcap_snp_c2_11685,solcap_snp_c2_11648,solcap_snp_c2_11646,PotVar0024528,PotVar0024602,PotVar0024611,solcap_snp_c2_11635,solcap_snp_c1_3761,solcap_snp_c2_11617,PotVar0024652,PotVar0024709,PotVar0024712,PotVar0024728,solcap_snp_c2_11616,PotVar0024744,solcap_snp_c2_53573,solcap_snp_c2_11775,solcap_snp_c2_11772,solcap_snp_c2_11771,solcap_snp_c1_3843,solcap_snp_c2_55263,PotVar0024781,solcap_snp_c2_12049,PotVar0024787,PotVar0024816,PotVar0024936,PotVar0024937,PotVar0024998,PotVar0025046,PotVar0025052,PotVar0025053,PotVar0025065,solcap_snp_c2_12005,solcap_snp_c2_11999,solcap_snp_c2_11996,solcap_snp_c2_11984,solcap_snp_c1_3819,solcap_snp_c2_11970,solcap_snp_c2_11967,PotVar0025296,solcap_snp_c2_11961,PotVar0025350,solcap_snp_c1_3815,PotVar0025360,solcap_snp_c2_11954,solcap_snp_c2_11952,solcap_snp_c2_11949,solcap_snp_c1_3798,solcap_snp_c1_3795,solcap_snp_c2_11924,solcap_snp_c1_3793,solcap_snp_c2_11923,PotVar0025440,PotVar0025449,PotVar0025527,PotVar0025554,solcap_snp_c2_11896,solcap_snp_c1_3790,PotVar0025580,PotVar0025592,PotVar0025599,PotVar0025600,PotVar0025607,PotVar0025609,PotVar0025739,PotVar0025762,PotVar0025773,solcap_snp_c2_11860,PotVar0025817,PotVar0025938,PotVar0025980,PotVar0025983,PotVar0026021,PotVar0026049,PotVar0026053,PotVar0026057,solcap_snp_c1_3784,solcap_snp_c2_11829,solcap_snp_c2_11803,solcap_snp_c2_11799,solcap_snp_c1_3810,solcap_snp_c2_11824,PotVar0026274,PotVar0026296,PotVar0026313,PotVar0026316,PotVar0026323,PotVar0026326,PotVar0026331,solcap_snp_c2_22986,PotVar0026350,PotVar0026355,PotVar0026358,PotVar0026402,PotVar0026420,PotVar0026425,PotVar0077822,PotVar0077830,PotVar0077832,PotVar0077868,PotVar0077879,PotVar0077892,PotVar0077897,PotVar0077924,PotVar0077955,PotVar0077965,PotVar0078021,PotVar0078030,PotVar0078045,PotVar0078060,PotVar0078126,PotVar0078161,PotVar0078162,PotVar0078199,PotVar0078207,PotVar0078213,PotVar0078250,PotVar0078282,PotVar0078379,PotVar0078411,PotVar0078439,PotVar0078443,PotVar0078518,PotVar0078519,PotVar0078533,PotVar0078561,PotVar0078566,PotVar0078593,PotVar0078645,PotVar0078648,PotVar0078649,PotVar0078685,PotVar0078713,PotVar0078725,PotVar0078841,PotVar0078881,PotVar0078939,solcap_snp_c2_22964,PotVar0079027,PotVar0079035,PotVar0079038,PotVar0079044,PotVar0079062,PotVar0079063,PotVar0079067,PotVar0079081,PotVar0079085,PotVar0079086,PotVar0079087,solcap_snp_c1_7356,PotVar0079110,PotVar0079150,PotVar0079157,solcap_snp_c1_7358,PotVar0079200,PotVar0079251,PotVar0079374,PotVar0079376,PotVar0079378,PotVar0079403,PotVar0079406,PotVar0079428,PotVar0079430,PotVar0079441,PotVar0079450,PotVar0079478,PotVar0079489,PotVar0079547,PotVar0079551,PotVar0079559,PotVar0079577,PotVar0079585,PotVar0079592,PotVar0079600,PotVar0079611,PotVar0079612,PotVar0079639,PotVar0079652,PotVar0079653,PotVar0079746,solcap_snp_c2_22995,PotVar0079782,PotVar0079803,PotVar0079820,solcap_snp_c2_23014,PotVar0079860,PotVar0079863,PotVar0079877,solcap_snp_c2_23017,PotVar0079901,PotVar0079930,PotVar0079935,PotVar0079948,PotVar0079955,PotVar0079966,PotVar0080053,PotVar0080138,PotVar0080186,PotVar0080210,solcap_snp_c1_7368,PotVar0080213,PotVar0080234,PotVar0080275,PotVar0080280,PotVar0080365,PotVar0080464,PotVar0080470,solcap_snp_c2_23032,PotVar0080570,PotVar0080614,PotVar0080669,PotVar0080736,PotVar0080753,PotVar0080776,PotVar0080789,PotVar0080850,PotVar0080867,PotVar0080881,solcap_snp_c2_23052,PotVar0129968,PotVar0129992,PotVar0130000,solcap_snp_c2_23055,solcap_snp_c2_23056,solcap_snp_c1_14802,solcap_snp_c2_50305,solcap_snp_c2_50304,solcap_snp_c2_50303,solcap_snp_c2_50302,solcap_snp_c2_50301,solcap_snp_c2_50298,PotVar0116826,PotVar0116897,PotVar0116951,PotVar0116977,PotVar0117018,PotVar0117047,PotVar0117065,PotVar0117068,PotVar0117073,solcap_snp_c2_54035,PotVar0117094,PotVar0117095,PotVar0117119,solcap_snp_c2_12495,solcap_snp_c1_4043,solcap_snp_c2_51478,solcap_snp_c2_51473,solcap_snp_c2_51470,PotVar0117190,PotVar0117192,PotVar0117232,PotVar0117267,PotVar0117270,PotVar0117275,PotVar0117291,solcap_snp_c1_14839,PotVar0117352,solcap_snp_c1_14840,PotVar0117354,solcap_snp_c2_50429,PotVar0117366,PotVar0117389,solcap_snp_c1_14841,PotVar0117419,PotVar0117437,PotVar0117438,PotVar0117441,PotVar0117449,PotVar0117473,PotVar0117491,solcap_snp_c2_50421,solcap_snp_c2_47644,PotVar0089860,solcap_snp_c2_47646,PotVar0089841,PotVar0089840,PotVar0089832,PotVar0089772,PotVar0089769,PotVar0089751,solcap_snp_c2_47648,solcap_snp_c2_47649,PotVar0089683,PotVar0089667,PotVar0089663,PotVar0089662,PotVar0089428,solcap_snp_c2_47660,solcap_snp_c2_47663,solcap_snp_c2_47607,solcap_snp_c2_47609,solcap_snp_c2_47611,solcap_snp_c2_47619,solcap_snp_c2_47625,solcap_snp_c2_52436,solcap_snp_c2_47284,solcap_snp_c2_38221,PotVar0089376,PotVar0089373,solcap_snp_c2_38193,solcap_snp_c2_38167,solcap_snp_c2_38163,solcap_snp_c2_38140,solcap_snp_c2_38229,solcap_snp_c2_55452,solcap_snp_c2_45522,solcap_snp_c2_45553,solcap_snp_c2_45517,PotVar0083756,PotVar0083774,PotVar0083800,PotVar0083806,PotVar0083923,PotVar0084074,PotVar0084089,PotVar0084120,PotVar0084159,PotVar0084163,PotVar0084164,PotVar0084190,solcap_snp_c2_37719,solcap_snp_c2_37697,solcap_snp_c2_37692,solcap_snp_c1_11267,PotVar0125811,PotVar0125830,PotVar0125832,PotVar0125947,solcap_snp_c1_11078,solcap_snp_c1_11088,solcap_snp_c1_15292,PotVar0085459,PotVar0085351,PotVar0085312,PotVar0085303,PotVar0085259,PotVar0085257,solcap_snp_c2_43523,solcap_snp_c2_43515,solcap_snp_c2_51020,solcap_snp_c2_51019,solcap_snp_c1_14954,solcap_snp_c2_55894,solcap_snp_c2_55899,solcap_snp_c2_55902,solcap_snp_c2_55905,PotVar0091843,PotVar0091740,PotVar0091668,PotVar0091625,PotVar0091619,PotVar0091575,PotVar0091465,PotVar0091464,PotVar0091432,PotVar0091388,PotVar0091259,PotVar0091229,solcap_snp_c1_14645,PotVar0091176,PotVar0091175,PotVar0091145,PotVar0091126,solcap_snp_c2_57876,solcap_snp_c2_57872,solcap_snp_c2_32877,PotVar0090998,PotVar0090986,solcap_snp_c2_32854,solcap_snp_c2_51899,PotVar0014571,PotVar0014553,PotVar0014552,solcap_snp_c2_43663,solcap_snp_c2_24329,solcap_snp_c2_24373,solcap_snp_c2_24381,PotVar0014510,PotVar0014509,PotVar0014498,PotVar0014494,PotVar0014440,solcap_snp_c2_38456,PotVar0014381,PotVar0014380,PotVar0014379,PotVar0014376,solcap_snp_c2_38490,PotVar0014357,PotVar0014354,PotVar0014349,PotVar0014299,solcap_snp_c2_56464,solcap_snp_c2_54598,PotVar0109875,PotVar0109880,PotVar0109947,solcap_snp_c2_53298,solcap_snp_c2_53307,solcap_snp_c2_53306,solcap_snp_c2_47087,solcap_snp_c2_38749,solcap_snp_c2_38748,solcap_snp_c2_38739,solcap_snp_c2_38738,solcap_snp_c2_38737,solcap_snp_c2_44034,solcap_snp_c1_12966,solcap_snp_c2_54725,solcap_snp_c2_53962,solcap_snp_c2_51980,solcap_snp_c2_54743,solcap_snp_c2_54742,solcap_snp_c2_54741,solcap_snp_c2_49280,PotVar0104964,PotVar0104925,PotVar0104920,PotVar0104911,PotVar0104871,PotVar0104825,solcap_snp_c2_49286,PotVar0104802,PotVar0104798,solcap_snp_c2_53565,solcap_snp_c2_44845,solcap_snp_c2_48317,solcap_snp_c2_44073,solcap_snp_c1_15249,solcap_snp_c1_12835,PotVar0021329,solcap_snp_c2_43566,solcap_snp_c2_43564,solcap_snp_c2_43568,solcap_snp_c2_54821,solcap_snp_c2_54825,solcap_snp_c1_14701,solcap_snp_c1_14700,solcap_snp_c1_5058,solcap_snp_c2_15714,solcap_snp_c2_15676,solcap_snp_c2_15681,solcap_snp_c2_15682,solcap_snp_c2_15690,solcap_snp_c2_15700,solcap_snp_c2_15701,PotVar0001214,PotVar0001227,PotVar0001240,PotVar0001247,PotVar0001266,PotVar0001272,solcap_snp_c2_15720,solcap_snp_c2_15722,solcap_snp_c2_15723,solcap_snp_c2_15733,solcap_snp_c2_15739,solcap_snp_c2_15742,solcap_snp_c2_15745,PotVar0001276,PotVar0001290,PotVar0001295,PotVar0001297,PotVar0001310,solcap_snp_c1_6338,PotVar0001317,PotVar0001318,PotVar0001342,PotVar0001360,solcap_snp_c2_49666,PotVar0001376,solcap_snp_c2_49677,solcap_snp_c2_52042,solcap_snp_c2_52058,solcap_snp_c2_52056,solcap_snp_c2_52055,solcap_snp_c2_52054,solcap_snp_c2_52053,PotVar0001435,PotVar0001436,solcap_snp_c2_52052,PotVar0001451,solcap_snp_c2_52044,solcap_snp_c1_15192,solcap_snp_c2_53239,solcap_snp_c1_15545,solcap_snp_c2_53223,solcap_snp_c2_53225,solcap_snp_c1_15537,solcap_snp_c2_53882,solcap_snp_c2_57189,PotVar0001513,PotVar0001525,PotVar0001526,PotVar0001530,solcap_snp_c2_32001,solcap_snp_c2_32000,solcap_snp_c1_9603,solcap_snp_c2_49480,solcap_snp_c1_14600,PotVar0001003,PotVar0001004,PotVar0001006,PotVar0001067,PotVar0001074,solcap_snp_c2_56307,solcap_snp_c2_56304,solcap_snp_c2_55687,solcap_snp_c2_50537,solcap_snp_c1_14873,solcap_snp_c2_50532,solcap_snp_c1_16345,solcap_snp_c1_14846,solcap_snp_c2_50455,solcap_snp_c2_50449,solcap_snp_c2_50444,solcap_snp_c1_15613,PotVar0018022,solcap_snp_c2_49587,solcap_snp_c1_4463,solcap_snp_c1_4455,solcap_snp_c1_4454,solcap_snp_c2_13865,solcap_snp_c2_13858,solcap_snp_c2_13856,solcap_snp_c1_4457,solcap_snp_c2_38256,solcap_snp_c2_38249,solcap_snp_c2_38252,PotVar0018043,solcap_snp_c2_54243,PotVar0123241,PotVar0123271,solcap_snp_c2_49384,solcap_snp_c2_49385,solcap_snp_c2_53600,solcap_snp_c2_54566,solcap_snp_c2_54561,solcap_snp_c2_54556,solcap_snp_c2_54576,solcap_snp_c2_54574,solcap_snp_c2_54572,solcap_snp_c2_38365,solcap_snp_c2_38356,solcap_snp_c2_50226,solcap_snp_c2_50231,solcap_snp_c2_50234,solcap_snp_c2_48422,solcap_snp_c2_47967,solcap_snp_c2_47980,solcap_snp_c1_14403,solcap_snp_c1_14402,solcap_snp_c2_48573,solcap_snp_c2_48581,solcap_snp_c2_48584,solcap_snp_c2_48587,solcap_snp_c2_57241,solcap_snp_c2_57242,solcap_snp_c2_57245,solcap_snp_c2_52397,solcap_snp_c2_40088,solcap_snp_c2_40089,solcap_snp_c1_11868,solcap_snp_c1_11870,solcap_snp_c2_40092,solcap_snp_c2_47389,solcap_snp_c2_47390,solcap_snp_c2_47392,solcap_snp_c2_47393,solcap_snp_c2_47394,solcap_snp_c1_14086,solcap_snp_c1_14087,solcap_snp_c2_47396,solcap_snp_c2_47397,solcap_snp_c2_47399,solcap_snp_c2_5006,solcap_snp_c1_1802,solcap_snp_c2_5003,solcap_snp_c2_5221,solcap_snp_c2_5217,solcap_snp_c2_5216,solcap_snp_c2_5214,solcap_snp_c2_5212,solcap_snp_c1_1881,solcap_snp_c2_5154,solcap_snp_c2_5152,solcap_snp_c2_5151,solcap_snp_c2_5150,solcap_snp_c1_1874,PotVar0106514,PotVar0106504,PotVar0106500,PotVar0106499,PotVar0106493,solcap_snp_c2_5137,solcap_snp_c2_50176,PotVar0034092,PotVar0034003,PotVar0033995,PotVar0033978,PotVar0033939,solcap_snp_c1_16071,solcap_snp_c1_15965,solcap_snp_c1_14913,solcap_snp_c2_44373,solcap_snp_c2_44375,solcap_snp_c2_44385,solcap_snp_c1_13068,solcap_snp_c1_12003,solcap_snp_c2_40776,solcap_snp_c2_40775,solcap_snp_c1_11998,solcap_snp_c1_11997,solcap_snp_c1_12015,solcap_snp_c2_40821,solcap_snp_c1_12014,solcap_snp_c2_50841,solcap_snp_c2_50840,solcap_snp_c2_50838,solcap_snp_c2_51570,solcap_snp_c2_51591,solcap_snp_c2_51583,solcap_snp_c2_51578,solcap_snp_c2_49651,solcap_snp_c2_49653,solcap_snp_c1_14684,solcap_snp_c2_42384,solcap_snp_c2_42382,solcap_snp_c1_12414,solcap_snp_c2_42374,solcap_snp_c1_12447,solcap_snp_c1_12446,solcap_snp_c1_12419,solcap_snp_c1_16068,solcap_snp_c2_49128,PotVar0126198,PotVar0126177,PotVar0126170,solcap_snp_c2_49147,solcap_snp_c2_49116,solcap_snp_c2_49117,solcap_snp_c2_10411,solcap_snp_c1_3352,solcap_snp_c1_3375,PotVar0081319,PotVar0081357,PotVar0081371,solcap_snp_c1_3392,PotVar0081471,PotVar0081524,PotVar0081536,PotVar0081566,PotVar0081571,PotVar0081574,PotVar0081577,solcap_snp_c2_10287,solcap_snp_c2_10291,solcap_snp_c2_10292,solcap_snp_c2_10296,solcap_snp_c2_10338,solcap_snp_c2_10339,solcap_snp_c2_10341,solcap_snp_c2_10342,solcap_snp_c2_10343,PotVar0081647,PotVar0081678,PotVar0081681,PotVar0081696,PotVar0081707,PotVar0081723,PotVar0081749,PotVar0081751,solcap_snp_c2_10378,solcap_snp_c2_10381,PotVar0081821,PotVar0081866,PotVar0081901,PotVar0081987,PotVar0082001,PotVar0082002,PotVar0082011,PotVar0082012,PotVar0082013,PotVar0082079,PotVar0082093,PotVar0082096,PotVar0082100,PotVar0082107,PotVar0082108,PotVar0082122,PotVar0082125,PotVar0082142,solcap_snp_c2_54372,solcap_snp_c2_54371,solcap_snp_c2_54370,solcap_snp_c2_54364,PotVar0123212,PotVar0123209,PotVar0123206,PotVar0123201,PotVar0123199,PotVar0123189,PotVar0123186,solcap_snp_c2_42542,solcap_snp_c2_42450,solcap_snp_c2_42451,solcap_snp_c2_42453,solcap_snp_c2_42455,PotVar0123144,PotVar0123135,PotVar0123127,PotVar0123117,PotVar0123108,solcap_snp_c2_42475,PotVar0123086,PotVar0123022,PotVar0122968,solcap_snp_c2_42481,solcap_snp_c2_55571,solcap_snp_c2_55240,solcap_snp_c2_8356,PotVar0128236,PotVar0128222,PotVar0128163,PotVar0128071,PotVar0128000,solcap_snp_c2_8427,solcap_snp_c2_8428,solcap_snp_c2_8431,solcap_snp_c2_8240,solcap_snp_c2_8256,solcap_snp_c2_8278,solcap_snp_c2_8295,solcap_snp_c2_8302,solcap_snp_c2_8332,solcap_snp_c1_2840,PotVar0034989,PotVar0034986,PotVar0034978,PotVar0034977,PotVar0034973,PotVar0034971,PotVar0034970,PotVar0034966,solcap_snp_c1_2865,solcap_snp_c2_8510,solcap_snp_c2_8511,solcap_snp_c2_8512,solcap_snp_c2_8517,solcap_snp_c1_2917,PotVar0034952,PotVar0034941,PotVar0034893,PotVar0034886,solcap_snp_c2_8210,PotVar0034838,PotVar0034819,PotVar0034812,PotVar0034726,solcap_snp_c1_1195,solcap_snp_c2_3512,solcap_snp_c2_3510,solcap_snp_c2_3504,solcap_snp_c2_3502,solcap_snp_c1_1163,PotVar0034688,PotVar0034649,solcap_snp_c2_3452,PotVar0034580,PotVar0034578,PotVar0034574,solcap_snp_c1_1125,solcap_snp_c1_1123,PotVar0034530,solcap_snp_c2_3439,solcap_snp_c1_1116,solcap_snp_c1_1094,solcap_snp_c1_1091,solcap_snp_c1_1077,PotVar0034469,PotVar0034467,PotVar0034466,PotVar0034408,solcap_snp_c2_3377,solcap_snp_c1_1058,solcap_snp_c1_1250,solcap_snp_c1_1249,solcap_snp_c2_3585,solcap_snp_c1_1219,solcap_snp_c1_1216,PotVar0083604,PotVar0083565,PotVar0083563,PotVar0083550,PotVar0083537,PotVar0083434,PotVar0083431,solcap_snp_c2_43935,solcap_snp_c2_54010,solcap_snp_c1_15726,solcap_snp_c2_30501,solcap_snp_c2_30652,solcap_snp_c1_9224,PotVar0083246,PotVar0083225,PotVar0083214,PotVar0083119,PotVar0083102,PotVar0083053,PotVar0082947,PotVar0082918,PotVar0082855,PotVar0082845,solcap_snp_c2_30492,solcap_snp_c1_9229,solcap_snp_c2_30495,solcap_snp_c2_30509,solcap_snp_c2_30534,solcap_snp_c2_30566,solcap_snp_c1_9250,solcap_snp_c2_30585,solcap_snp_c2_30594,solcap_snp_c2_30595,solcap_snp_c2_30612,solcap_snp_c2_36454,solcap_snp_c2_36427,solcap_snp_c1_10873,solcap_snp_c2_36393,solcap_snp_c2_36456,solcap_snp_c2_36391,solcap_snp_c2_36390,solcap_snp_c2_36388,solcap_snp_c2_36370,solcap_snp_c2_53250,solcap_snp_c1_13641,solcap_snp_c1_13638,solcap_snp_c1_13636,solcap_snp_c2_45971,solcap_snp_c2_46016,solcap_snp_c1_13644,solcap_snp_c2_46002,solcap_snp_c2_55556,solcap_snp_c2_55553,solcap_snp_c1_11418,solcap_snp_c2_38323,solcap_snp_c2_38330,solcap_snp_c2_38333,solcap_snp_c2_38335,solcap_snp_c2_38339,solcap_snp_c2_27620,solcap_snp_c2_27596,solcap_snp_c2_27590,PotVar0027083,PotVar0027050,PotVar0027031,solcap_snp_c2_27588,PotVar0026995,PotVar0026970,solcap_snp_c2_27587,PotVar0026902,PotVar0026864,solcap_snp_c2_27582,solcap_snp_c2_27574,solcap_snp_c2_27563,solcap_snp_c2_27561,solcap_snp_c2_27559,PotVar0026734,PotVar0026688,solcap_snp_c2_27571,solcap_snp_c2_27565,solcap_snp_c1_922,solcap_snp_c1_921,solcap_snp_c2_3137,solcap_snp_c2_3135,solcap_snp_c2_3134,solcap_snp_c2_3127,solcap_snp_c2_3106,solcap_snp_c2_3104,solcap_snp_c2_3092,solcap_snp_c2_3091,solcap_snp_c2_3174,solcap_snp_c2_3172,solcap_snp_c2_3167,solcap_snp_c2_3166,solcap_snp_c2_3165,solcap_snp_c2_3163,solcap_snp_c2_3162,solcap_snp_c2_3158,solcap_snp_c2_56974,solcap_snp_c2_3155,solcap_snp_c2_3154,solcap_snp_c2_3153,solcap_snp_c1_925,solcap_snp_c2_3152,solcap_snp_c2_3146,solcap_snp_c2_3142,solcap_snp_c2_36710,solcap_snp_c2_36709,solcap_snp_c1_10935,solcap_snp_c1_10934,solcap_snp_c2_36708,solcap_snp_c1_10932,solcap_snp_c2_36706,solcap_snp_c2_36703,solcap_snp_c1_10938,solcap_snp_c1_10939,solcap_snp_c2_36721,solcap_snp_c2_56259,solcap_snp_c2_46993,solcap_snp_c2_46994,solcap_snp_c2_46995,solcap_snp_c2_46997,solcap_snp_c2_33932,solcap_snp_c2_50190,solcap_snp_c2_50188,solcap_snp_c2_50186,solcap_snp_c2_50183,solcap_snp_c2_50182,solcap_snp_c2_50180,solcap_snp_c2_50179,solcap_snp_c2_50206,solcap_snp_c2_50199,solcap_snp_c1_16656,solcap_snp_c1_16657,solcap_snp_c2_54340,solcap_snp_c1_15811,solcap_snp_c2_24266,solcap_snp_c1_7716,solcap_snp_c1_7721,solcap_snp_c2_57226,solcap_snp_c2_57230,solcap_snp_c2_24280,solcap_snp_c2_24287,solcap_snp_c2_46048,solcap_snp_c2_17377,solcap_snp_c2_17378,solcap_snp_c2_17379,solcap_snp_c2_17380,solcap_snp_c2_26498,solcap_snp_c2_26499,solcap_snp_c2_26500,solcap_snp_c2_26501,solcap_snp_c2_33105,PotVar0086307,PotVar0036573,PotVar0036584,solcap_snp_c2_18787,PotVar0040740,solcap_snp_c1_9601,solcap_snp_c2_56793,solcap_snp_c2_56794,solcap_snp_c2_57013,solcap_snp_c1_16621,solcap_snp_c2_33233,solcap_snp_c2_33228,solcap_snp_c2_33226,PotVar0083629,solcap_snp_c2_12403,solcap_snp_c2_12402,solcap_snp_c1_14880,solcap_snp_c2_4594,solcap_snp_c2_4593,PotVar0004038,PotVar0003983,solcap_snp_c2_4590,solcap_snp_c2_55661,solcap_snp_c2_24052,solcap_snp_c2_24050,solcap_snp_c2_32893,solcap_snp_c2_32894,solcap_snp_c1_10560,solcap_snp_c2_35590,solcap_snp_c2_35592,solcap_snp_c2_11293,PotVar0069582,PotVar0069471,solcap_snp_c2_11286,solcap_snp_c2_11287,solcap_snp_c2_11289,PotVar0069434,PotVar0069383,solcap_snp_c2_11294,PotVar0069362,solcap_snp_c2_11303,solcap_snp_c2_11309,solcap_snp_c2_11310,solcap_snp_c2_11312,solcap_snp_c2_11313,solcap_snp_c2_11314,solcap_snp_c2_11315,solcap_snp_c2_11316,solcap_snp_c2_11330,solcap_snp_c2_11333,solcap_snp_c2_11334,solcap_snp_c1_3689,solcap_snp_c1_3691,solcap_snp_c2_52569,PotVar0131933,PotVar0131893,PotVar0131877,PotVar0131873,PotVar0131863,solcap_snp_c2_36590,solcap_snp_c1_10901,solcap_snp_c2_32952,solcap_snp_c2_32941,solcap_snp_c2_32940,solcap_snp_c2_32924,solcap_snp_c2_32919,solcap_snp_c2_32918,solcap_snp_c2_32917,solcap_snp_c1_9846,solcap_snp_c2_34002,solcap_snp_c2_34003,solcap_snp_c1_10157,solcap_snp_c1_13871,solcap_snp_c2_49638,solcap_snp_c2_50215,PotVar0096925,PotVar0096921,PotVar0096920,PotVar0096874,solcap_snp_c2_50222,solcap_snp_c2_50221,solcap_snp_c2_50220,solcap_snp_c1_8603,solcap_snp_c2_27867,solcap_snp_c2_55596,PotVar0090320,PotVar0090332,PotVar0090338,PotVar0090345,PotVar0090346,PotVar0090366,PotVar0090367,solcap_snp_c1_8599,solcap_snp_c2_27846,solcap_snp_c1_8597,solcap_snp_c1_8594,solcap_snp_c2_27845,solcap_snp_c1_16661,solcap_snp_c2_24297,PotVar0093268,PotVar0093261,PotVar0093231,PotVar0093200,PotVar0093175,PotVar0093168,solcap_snp_c2_24311,solcap_snp_c2_24321,solcap_snp_c2_24322,solcap_snp_c2_24323,PotVar0093127,PotVar0093114,solcap_snp_c2_45283,solcap_snp_c1_12409,solcap_snp_c2_42346,solcap_snp_c2_42347,solcap_snp_c2_42348,solcap_snp_c2_42351,solcap_snp_c2_42353,solcap_snp_c2_42355,solcap_snp_c2_37626,solcap_snp_c2_37603,solcap_snp_c2_37615,solcap_snp_c2_37623,solcap_snp_c2_43097,solcap_snp_c2_43096,solcap_snp_c2_43093,solcap_snp_c2_43084,solcap_snp_c2_43081,solcap_snp_c1_12691,PotVar0104779,PotVar0104776,PotVar0104750,PotVar0104747,PotVar0104741,PotVar0104740,solcap_snp_c2_43068,solcap_snp_c2_43059,solcap_snp_c2_43058,solcap_snp_c2_43056,solcap_snp_c2_43109,solcap_snp_c2_43107,solcap_snp_c2_43064,solcap_snp_c2_43104,PotVar0104705,PotVar0104703,PotVar0104660,PotVar0104638,PotVar0104586,solcap_snp_c2_51774,solcap_snp_c2_51772,solcap_snp_c2_51771,solcap_snp_c2_51769,solcap_snp_c2_51768,solcap_snp_c2_51767,solcap_snp_c2_51766,solcap_snp_c2_51765,solcap_snp_c2_51762,solcap_snp_c2_51761,solcap_snp_c2_51760,solcap_snp_c2_51758,solcap_snp_c2_51757,solcap_snp_c2_51756,solcap_snp_c2_56059,solcap_snp_c2_56058,solcap_snp_c2_56056,solcap_snp_c2_56055,solcap_snp_c1_15233,solcap_snp_c2_54222,solcap_snp_c2_54220,PotVar0134018,PotVar0133948,PotVar0133938,PotVar0133933,PotVar0133873,solcap_snp_c2_57892,PotVar0133869,solcap_snp_c2_33372,solcap_snp_c2_33299,solcap_snp_c2_33302,solcap_snp_c2_33314,solcap_snp_c2_33364,solcap_snp_c2_33365,solcap_snp_c2_33375,solcap_snp_c2_33297,solcap_snp_c2_56324,solcap_snp_c2_56323,solcap_snp_c2_33304,solcap_snp_c2_33307,solcap_snp_c2_33316,PotVar0054938,PotVar0054901,solcap_snp_c2_33346,solcap_snp_c2_33354,solcap_snp_c2_33358,solcap_snp_c2_51489,solcap_snp_c2_51480,solcap_snp_c2_31585,solcap_snp_c2_31586,solcap_snp_c2_31592,solcap_snp_c2_31600,solcap_snp_c2_31605,solcap_snp_c2_31648,solcap_snp_c2_40242,solcap_snp_c2_40239,solcap_snp_c2_40266,solcap_snp_c2_40260,solcap_snp_c2_40236,solcap_snp_c2_45833,solcap_snp_c2_45834,solcap_snp_c2_45837,solcap_snp_c2_52381,solcap_snp_c2_52385,solcap_snp_c2_52391,solcap_snp_c2_48886,PotVar0087343,PotVar0087356,PotVar0087365,solcap_snp_c2_55083,PotVar0087395,PotVar0087403,solcap_snp_c2_54029,solcap_snp_c2_49048,solcap_snp_c2_49052,solcap_snp_c2_49053,solcap_snp_c2_49060,solcap_snp_c2_43135,PotVar0127370,PotVar0127327,PotVar0127288,PotVar0127277,PotVar0127275,PotVar0127264,PotVar0127254,solcap_snp_c2_57014,solcap_snp_c2_57015,solcap_snp_c2_57016,solcap_snp_c2_57017,solcap_snp_c2_57018,solcap_snp_c1_12696,solcap_snp_c2_43113,solcap_snp_c2_43116,solcap_snp_c2_43123,solcap_snp_c2_43124,PotVar0127215,PotVar0127210,PotVar0127196,PotVar0127165,PotVar0127129,PotVar0127104,solcap_snp_c2_43127,solcap_snp_c2_57408,solcap_snp_c2_57409,solcap_snp_c2_57412,solcap_snp_c2_37766,solcap_snp_c2_37770,solcap_snp_c2_37783,solcap_snp_c1_11275,solcap_snp_c1_11276,solcap_snp_c1_11277,solcap_snp_c2_37756,solcap_snp_c2_37757,solcap_snp_c2_37759,PotVar0119420,PotVar0119435,PotVar0119498,solcap_snp_c2_37762,solcap_snp_c2_37767,solcap_snp_c2_37774,solcap_snp_c2_55700,solcap_snp_c2_52763,solcap_snp_c2_52767,solcap_snp_c2_52768,solcap_snp_c2_39626,solcap_snp_c2_39627,solcap_snp_c2_39576,solcap_snp_c1_11707,solcap_snp_c2_57172,PotVar0133544,PotVar0133545,PotVar0133565,solcap_snp_c2_53055,solcap_snp_c2_53053,solcap_snp_c2_49883,solcap_snp_c2_49889,solcap_snp_c2_47775,solcap_snp_c1_12051,solcap_snp_c2_47484,solcap_snp_c2_47495,solcap_snp_c2_57989,solcap_snp_c2_56132,solcap_snp_c2_25926,solcap_snp_c1_8133,solcap_snp_c1_8132,solcap_snp_c1_8131,solcap_snp_c2_25947,solcap_snp_c2_31981,solcap_snp_c2_31873,PotVar0070228,PotVar0070227,PotVar0070225,PotVar0070189,PotVar0070149,PotVar0070148,PotVar0070093,PotVar0070088,PotVar0070078,solcap_snp_c2_31893,solcap_snp_c2_31913,solcap_snp_c2_54192,solcap_snp_c2_54191,PotVar0070014,PotVar0070000,PotVar0069973,PotVar0069959,solcap_snp_c2_54195,solcap_snp_c2_54194,solcap_snp_c2_54193,solcap_snp_c2_46184,solcap_snp_c2_46172,solcap_snp_c2_46171,solcap_snp_c1_13805,PotVar0085941,PotVar0085948,PotVar0085969,PotVar0085980,PotVar0086012,PotVar0086046,PotVar0086196,PotVar0086198,PotVar0086205,solcap_snp_c2_16863,solcap_snp_c2_16864,solcap_snp_c2_16764,solcap_snp_c2_16767,solcap_snp_c2_56094,solcap_snp_c2_16775,solcap_snp_c2_16777,solcap_snp_c2_16778,solcap_snp_c2_16780,solcap_snp_c2_16785,solcap_snp_c1_5440,solcap_snp_c2_16793,solcap_snp_c2_16794,solcap_snp_c2_16797,solcap_snp_c2_16798,solcap_snp_c2_16799,solcap_snp_c2_16804,solcap_snp_c1_5443,solcap_snp_c2_16817,solcap_snp_c2_16818,solcap_snp_c2_54061,solcap_snp_c1_15381,solcap_snp_c2_52591,solcap_snp_c1_15380,solcap_snp_c2_52584,solcap_snp_c2_52583,solcap_snp_c1_15372,solcap_snp_c1_15371,PotVar0090868,PotVar0090796,PotVar0090785,PotVar0090783,solcap_snp_c1_15368,solcap_snp_c2_52575,PotVar0090705,PotVar0090703,PotVar0090695,solcap_snp_c2_31193,solcap_snp_c2_31214,PotVar0090673,PotVar0090581,PotVar0090556,PotVar0090555,solcap_snp_c1_9445,solcap_snp_c1_9450,solcap_snp_c2_50605,solcap_snp_c2_50589,solcap_snp_c2_50592,solcap_snp_c2_50595,solcap_snp_c2_50596,PotVar0090477,PotVar0090474,PotVar0090465,PotVar0090460,PotVar0090458,PotVar0090457,PotVar0090407,solcap_snp_c2_31139,solcap_snp_c2_31144,solcap_snp_c2_31156,solcap_snp_c2_31180,solcap_snp_c2_31181,PotVar0084774,PotVar0084794,PotVar0084795,PotVar0084805,PotVar0084828,PotVar0084850,PotVar0084854,solcap_snp_c2_35902,solcap_snp_c1_10646,solcap_snp_c2_35897,solcap_snp_c2_35893,solcap_snp_c2_35889,solcap_snp_c2_33891,solcap_snp_c2_33892,solcap_snp_c2_33893,solcap_snp_c2_33777,solcap_snp_c1_10109,PotVar0085035,PotVar0085050,solcap_snp_c2_33863,solcap_snp_c2_33866,solcap_snp_c2_33871,solcap_snp_c2_5836,solcap_snp_c2_5842,solcap_snp_c2_5867,solcap_snp_c2_5868,solcap_snp_c2_5869,solcap_snp_c1_2116,solcap_snp_c1_2117,PotVar0085064,PotVar0085080,PotVar0085088,PotVar0085104,PotVar0085113,PotVar0085114,PotVar0085119,solcap_snp_c1_2060,solcap_snp_c1_2065,solcap_snp_c2_5769,solcap_snp_c2_5770,solcap_snp_c2_5774,solcap_snp_c1_2071,solcap_snp_c2_5784,solcap_snp_c1_2082,solcap_snp_c2_5812,solcap_snp_c1_2086,PotVar0126515,solcap_snp_c2_5814,PotVar0126492,PotVar0126474,PotVar0126457,PotVar0126447,PotVar0126440,PotVar0126430,solcap_snp_c2_5821,solcap_snp_c1_2090,solcap_snp_c1_2091,solcap_snp_c2_5845,PotVar0126405,solcap_snp_c2_5850,PotVar0126377,solcap_snp_c2_5852,PotVar0126362,PotVar0126359,PotVar0126357,PotVar0126332,PotVar0126314,PotVar0126313,PotVar0126286,PotVar0126283,PotVar0126275,solcap_snp_c1_2112,solcap_snp_c2_41412,solcap_snp_c2_41406,solcap_snp_c2_41405,PotVar0073883,PotVar0073886,PotVar0073911,PotVar0073948,PotVar0073953,PotVar0073956,PotVar0073961,PotVar0073982,PotVar0073985,PotVar0074004,PotVar0074039,PotVar0074067,solcap_snp_c2_56145,solcap_snp_c1_13135,solcap_snp_c2_44583,PotVar0074102,PotVar0074119,PotVar0074133,PotVar0074169,PotVar0074175,PotVar0074196,PotVar0074198,solcap_snp_c2_45581,solcap_snp_c2_8832,solcap_snp_c1_3003,solcap_snp_c2_8867,solcap_snp_c1_3011,solcap_snp_c1_3012,solcap_snp_c1_2953,solcap_snp_c1_2960,solcap_snp_c2_8786,solcap_snp_c2_8788,solcap_snp_c1_2978,solcap_snp_c2_8790,solcap_snp_c2_8792,solcap_snp_c2_8796,solcap_snp_c2_8812,solcap_snp_c2_8813,solcap_snp_c2_8822,solcap_snp_c2_8823,solcap_snp_c2_8861,solcap_snp_c2_8897,solcap_snp_c2_8898,solcap_snp_c2_8904,solcap_snp_c2_8926,solcap_snp_c2_8927,solcap_snp_c2_8942,solcap_snp_c2_8966,solcap_snp_c2_8988,PotVar0040690,PotVar0040682,PotVar0040680,PotVar0040650,PotVar0040624,PotVar0040618,solcap_snp_c2_8999,solcap_snp_c2_9001,solcap_snp_c2_9002,solcap_snp_c2_9003,solcap_snp_c2_9004,solcap_snp_c2_9005,solcap_snp_c2_9006,solcap_snp_c2_9009,solcap_snp_c2_9010,solcap_snp_c2_9011,solcap_snp_c2_8650,solcap_snp_c2_8652,solcap_snp_c1_2944,solcap_snp_c2_8659,solcap_snp_c2_8662,solcap_snp_c2_8663,solcap_snp_c2_22289,solcap_snp_c2_22388,solcap_snp_c2_22239,solcap_snp_c2_22244,solcap_snp_c2_22247,PotVar0040540,PotVar0040538,PotVar0040532,PotVar0040531,PotVar0040524,solcap_snp_c2_57655,solcap_snp_c1_6992,solcap_snp_c1_6994,solcap_snp_c1_6997,solcap_snp_c1_7005,PotVar0040507,PotVar0040499,PotVar0040491,PotVar0040479,solcap_snp_c2_22334,solcap_snp_c2_22335,solcap_snp_c2_22336,PotVar0040426,PotVar0040397,PotVar0040388,PotVar0040358,PotVar0040353,PotVar0040351,PotVar0040299,PotVar0040289,PotVar0040287,PotVar0040262,PotVar0040249,PotVar0040248,PotVar0040236,PotVar0040228,solcap_snp_c1_7031,solcap_snp_c2_22367,solcap_snp_c1_7040,solcap_snp_c1_7041,PotVar0040162,PotVar0040161,PotVar0040137,PotVar0040125,PotVar0040122,PotVar0040100,PotVar0040071,PotVar0040034,PotVar0039998,PotVar0039982,solcap_snp_c2_22393,PotVar0039963,PotVar0039962,PotVar0039939,PotVar0039932,PotVar0039905,PotVar0039904,PotVar0039897,PotVar0039893,PotVar0039866,PotVar0039801,solcap_snp_c2_22404,PotVar0039770,PotVar0039728,PotVar0039697,PotVar0039692,PotVar0039687,PotVar0039686,PotVar0039654,solcap_snp_c2_24245,solcap_snp_c2_24244,solcap_snp_c2_24229,solcap_snp_c1_7704,solcap_snp_c1_7700,solcap_snp_c1_7695,solcap_snp_c2_24155,solcap_snp_c2_24152,solcap_snp_c1_7688,solcap_snp_c2_24115,solcap_snp_c2_24065,solcap_snp_c1_7682,solcap_snp_c1_7681,solcap_snp_c2_24064,solcap_snp_c1_7680,solcap_snp_c1_7679,solcap_snp_c2_57054,solcap_snp_c2_57055,solcap_snp_c2_29216,solcap_snp_c2_29205,solcap_snp_c2_29204,PotVar0041212,PotVar0041202,solcap_snp_c2_29187,solcap_snp_c2_29186,solcap_snp_c2_29165,PotVar0041199,PotVar0041190,PotVar0041187,PotVar0041174,solcap_snp_c2_29160,PotVar0041159,PotVar0041153,PotVar0041150,PotVar0041137,PotVar0041126,PotVar0041119,solcap_snp_c2_29169,solcap_snp_c2_1950,PotVar0041080,PotVar0041079,PotVar0041048,PotVar0041019,PotVar0040999,PotVar0040998,PotVar0040975,solcap_snp_c2_56590,solcap_snp_c2_37339,solcap_snp_c2_37358,solcap_snp_c2_37329,PotVar0127585,PotVar0127587,PotVar0127589,PotVar0127595,PotVar0127622,PotVar0127625,solcap_snp_c2_37350,solcap_snp_c1_11144,solcap_snp_c1_8674,solcap_snp_c1_8673,solcap_snp_c2_28134,PotVar0056942,solcap_snp_c1_8659,solcap_snp_c1_8679,solcap_snp_c1_16127,solcap_snp_c2_55535,solcap_snp_c2_50778,solcap_snp_c2_50773,PotVar0056976,PotVar0056996,PotVar0056998,solcap_snp_c2_50802,solcap_snp_c2_50801,solcap_snp_c2_50800,solcap_snp_c2_50799,solcap_snp_c2_50798,solcap_snp_c2_50797,solcap_snp_c2_50796,solcap_snp_c2_50259,solcap_snp_c2_50275,solcap_snp_c2_41237,solcap_snp_c2_41223,PotVar0057013,PotVar0057081,PotVar0057090,PotVar0057091,PotVar0057109,PotVar0057119,PotVar0057135,PotVar0057170,PotVar0057182,PotVar0057192,solcap_snp_c2_41189,PotVar0057253,PotVar0057255,PotVar0057284,PotVar0057365,PotVar0057370,solcap_snp_c2_9083,solcap_snp_c1_3074,solcap_snp_c2_9047,solcap_snp_c2_9043,solcap_snp_c2_9039,solcap_snp_c2_9038,solcap_snp_c2_9308,solcap_snp_c1_3130,solcap_snp_c1_3126,solcap_snp_c1_3125,solcap_snp_c2_9292,solcap_snp_c2_9269,solcap_snp_c2_9247,PotVar0132752,PotVar0132754,PotVar0132760,PotVar0132831,PotVar0132840,PotVar0132845,PotVar0132848,PotVar0132862,PotVar0132863,solcap_snp_c2_9245,solcap_snp_c1_3098,solcap_snp_c2_9237,solcap_snp_c2_9220,solcap_snp_c2_9219,solcap_snp_c2_9216,solcap_snp_c2_9215,solcap_snp_c2_9214,solcap_snp_c2_9203,solcap_snp_c2_9202,solcap_snp_c2_9201,solcap_snp_c2_9193,PotVar0065852,PotVar0065875,PotVar0065888,PotVar0065896,PotVar0065920,PotVar0065921,PotVar0065928,PotVar0065992,PotVar0066048,solcap_snp_c2_9137,solcap_snp_c2_9233,solcap_snp_c2_9172,solcap_snp_c1_3090,solcap_snp_c2_22118,solcap_snp_c2_22117,solcap_snp_c2_51418,solcap_snp_c1_15061,solcap_snp_c2_51428,solcap_snp_c2_51430,solcap_snp_c2_51415,solcap_snp_c1_14614,PotVar0066059,PotVar0066098,PotVar0066099,solcap_snp_c1_13951,solcap_snp_c1_15462,solcap_snp_c2_52905,solcap_snp_c2_46081,solcap_snp_c2_46100,solcap_snp_c1_13663,solcap_snp_c2_46102,solcap_snp_c2_46103,solcap_snp_c2_46106,solcap_snp_c2_46107,solcap_snp_c2_46108,solcap_snp_c2_46109,solcap_snp_c2_46111,solcap_snp_c2_46113,solcap_snp_c1_11534,PotVar0023040,PotVar0022997,solcap_snp_c1_11519,PotVar0022978,solcap_snp_c1_11520,solcap_snp_c1_11521,solcap_snp_c2_38828,solcap_snp_c1_11523,PotVar0022817,solcap_snp_c2_38893,PotVar0022763,PotVar0022719,PotVar0022711,PotVar0022708,PotVar0022694,PotVar0022691,solcap_snp_c2_38900,PotVar0022689,solcap_snp_c2_38830,solcap_snp_c1_11525,solcap_snp_c2_38867,solcap_snp_c2_38869,PotVar0022654,PotVar0022653,solcap_snp_c2_38871,PotVar0022579,PotVar0022575,solcap_snp_c2_38872,solcap_snp_c2_54652,PotVar0022541,PotVar0022529,solcap_snp_c1_15909,PotVar0022478,solcap_snp_c1_15913,solcap_snp_c1_15914,PotVar0022443,PotVar0022442,solcap_snp_c1_10788,solcap_snp_c2_36067,solcap_snp_c1_10781,PotVar0022397,PotVar0022288,PotVar0022264,PotVar0022249,PotVar0022245,solcap_snp_c1_10836,PotVar0022115,solcap_snp_c2_41690,solcap_snp_c2_45643,solcap_snp_c2_43960,solcap_snp_c2_26197,solcap_snp_c2_26296,PotVar0130023,PotVar0130025,PotVar0130065,PotVar0130091,solcap_snp_c2_26145,solcap_snp_c1_8164,solcap_snp_c2_26154,solcap_snp_c2_26162,solcap_snp_c2_26167,solcap_snp_c2_26182,solcap_snp_c1_8173,solcap_snp_c2_26211,solcap_snp_c2_26239,PotVar0102547,PotVar0102528,PotVar0102524,PotVar0102521,PotVar0102496,PotVar0102399,solcap_snp_c2_26248,PotVar0102381,PotVar0102380,PotVar0102374,PotVar0102371,PotVar0102362,PotVar0102342,PotVar0102341,PotVar0102334,PotVar0102326,PotVar0102276,solcap_snp_c1_8186,solcap_snp_c2_36882,solcap_snp_c2_36818,solcap_snp_c2_36831,solcap_snp_c2_36832,solcap_snp_c2_36833,solcap_snp_c2_36835,solcap_snp_c2_36838,PotVar0102262,solcap_snp_c2_36859,solcap_snp_c2_36872,PotVar0095918,PotVar0095883,solcap_snp_c2_55830,solcap_snp_c2_55831,solcap_snp_c2_55832,solcap_snp_c2_55833,solcap_snp_c2_55834,solcap_snp_c2_55835,PotVar0095825,solcap_snp_c1_16221,solcap_snp_c1_16222,solcap_snp_c1_16225,solcap_snp_c2_55837,solcap_snp_c2_55838,solcap_snp_c1_16227,PotVar0095725,solcap_snp_c2_52663,solcap_snp_c2_46379,solcap_snp_c2_46398,solcap_snp_c2_46393,solcap_snp_c2_43574,PotVar0095645,PotVar0095632,PotVar0095628,PotVar0095619,PotVar0095593,PotVar0095580,solcap_snp_c2_43588,PotVar0095478,solcap_snp_c2_43607,PotVar0132124,PotVar0132077,PotVar0132062,solcap_snp_c2_46749,solcap_snp_c2_46715,solcap_snp_c2_46710,solcap_snp_c2_46707,solcap_snp_c2_46755,solcap_snp_c2_48715,solcap_snp_c2_52377,solcap_snp_c2_52376,solcap_snp_c2_52374,solcap_snp_c2_53536,solcap_snp_c1_11942,solcap_snp_c1_15484,solcap_snp_c2_53041,solcap_snp_c2_53046,solcap_snp_c1_15485,solcap_snp_c1_11948,solcap_snp_c2_29386,solcap_snp_c2_29387,solcap_snp_c2_50034,solcap_snp_c2_50035,solcap_snp_c1_14735,PotVar0132672,PotVar0132671,PotVar0132645,PotVar0132627,solcap_snp_c2_56660,PotVar0132540,PotVar0132505,PotVar0132488,solcap_snp_c2_55986,solcap_snp_c2_47004,solcap_snp_c1_13594,solcap_snp_c2_45797,solcap_snp_c2_45798,solcap_snp_c2_45799,solcap_snp_c2_45800,PotVar0097662,PotVar0097692,PotVar0097695,PotVar0097752,PotVar0097756,PotVar0097761,solcap_snp_c2_45787,solcap_snp_c2_45795,solcap_snp_c1_16202,solcap_snp_c2_42640,PotVar0103477,solcap_snp_c2_56433,PotVar0127526,PotVar0127505,PotVar0127472,PotVar0127459,PotVar0127439,PotVar0127400,PotVar0127394,PotVar0127381,PotVar0127372,solcap_snp_c1_15203,solcap_snp_c2_52104,solcap_snp_c2_52106,solcap_snp_c2_52110,solcap_snp_c2_8740,solcap_snp_c2_36214,PotVar0028432,PotVar0028392,PotVar0028391,PotVar0028383,PotVar0028326,PotVar0028271,PotVar0028147,solcap_snp_c1_10842,solcap_snp_c2_36159,solcap_snp_c2_36160,solcap_snp_c2_36161,solcap_snp_c2_36170,solcap_snp_c1_10844,solcap_snp_c2_36174,solcap_snp_c2_36181,solcap_snp_c2_36185,solcap_snp_c2_36186,solcap_snp_c1_10848,solcap_snp_c2_36196,solcap_snp_c2_36202,solcap_snp_c2_36206,solcap_snp_c1_10855,solcap_snp_c2_49834,solcap_snp_c2_49836,solcap_snp_c2_49841,solcap_snp_c2_6600,solcap_snp_c2_6603,solcap_snp_c2_6606,solcap_snp_c2_6607,solcap_snp_c2_6608,solcap_snp_c2_6609,PotVar0028092,PotVar0028091,PotVar0028084,PotVar0028083,PotVar0028081,PotVar0028063,PotVar0028059,PotVar0028053,PotVar0028046,solcap_snp_c2_6614,PotVar0028044,PotVar0028042,solcap_snp_c2_6616,solcap_snp_c2_6617,solcap_snp_c2_6618,PotVar0028036,PotVar0028024,solcap_snp_c2_6619,solcap_snp_c2_6620,solcap_snp_c2_6621,PotVar0027956,solcap_snp_c1_2404,solcap_snp_c1_2405,PotVar0027937,PotVar0027925,PotVar0027924,solcap_snp_c2_6622,PotVar0027907,solcap_snp_c2_6629,solcap_snp_c2_6630,solcap_snp_c2_6666,solcap_snp_c1_2398,solcap_snp_c2_6574,solcap_snp_c2_6582,solcap_snp_c2_6584,solcap_snp_c1_1551,solcap_snp_c2_4578,solcap_snp_c2_4579,solcap_snp_c2_4583,PotVar0012596,PotVar0012598,PotVar0012599,solcap_snp_c2_4342,solcap_snp_c1_1481,solcap_snp_c2_11398,solcap_snp_c2_11388,solcap_snp_c2_11386,PotVar0086359,PotVar0086375,PotVar0086474,PotVar0086493,solcap_snp_c1_3698,PotVar0086496,PotVar0086506,PotVar0086514,solcap_snp_c1_3697,solcap_snp_c1_3696,solcap_snp_c1_16451,solcap_snp_c1_16450,solcap_snp_c2_19701,solcap_snp_c2_19704,solcap_snp_c2_19707,solcap_snp_c2_19708,solcap_snp_c2_19716,solcap_snp_c2_4393,solcap_snp_c2_19695,solcap_snp_c2_19696,solcap_snp_c2_45214,solcap_snp_c2_45215,solcap_snp_c1_13998,solcap_snp_c2_47090,solcap_snp_c1_6523,solcap_snp_c2_20577,solcap_snp_c2_5902,solcap_snp_c2_5901,solcap_snp_c2_5900,solcap_snp_c1_2124,solcap_snp_c2_31364,solcap_snp_c1_9478,solcap_snp_c2_31366,solcap_snp_c2_31367,solcap_snp_c2_31369,solcap_snp_c2_31370,solcap_snp_c2_31373,solcap_snp_c2_31375,solcap_snp_c2_31376,solcap_snp_c2_46570,solcap_snp_c2_46567,solcap_snp_c2_26521,solcap_snp_c1_8215,solcap_snp_c2_2855,solcap_snp_c2_2856,solcap_snp_c2_2858,solcap_snp_c2_8193,solcap_snp_c2_8185,solcap_snp_c2_8183,solcap_snp_c1_2780,solcap_snp_c1_2778,solcap_snp_c2_8178,solcap_snp_c2_34558,solcap_snp_c2_34560,solcap_snp_c2_34561,solcap_snp_c2_34562,solcap_snp_c1_5932,solcap_snp_c1_5933,solcap_snp_c1_8891,solcap_snp_c1_8890,solcap_snp_c2_29249,solcap_snp_c2_29268,solcap_snp_c2_29267,solcap_snp_c2_29265,solcap_snp_c2_29261,solcap_snp_c2_29255,solcap_snp_c2_29254,solcap_snp_c2_11404,solcap_snp_c2_11400,solcap_snp_c1_2789,solcap_snp_c1_2790,solcap_snp_c1_2792,solcap_snp_c1_2795,solcap_snp_c2_7712,solcap_snp_c2_7715,solcap_snp_c2_7716,solcap_snp_c2_7718,solcap_snp_c2_7735,solcap_snp_c2_7741,solcap_snp_c1_2672,solcap_snp_c1_512,solcap_snp_c2_2082,solcap_snp_c2_2083,solcap_snp_c1_513,solcap_snp_c2_1962,solcap_snp_c2_1964,solcap_snp_c2_1968,solcap_snp_c2_1975,solcap_snp_c2_1980,solcap_snp_c2_1993,solcap_snp_c1_482,solcap_snp_c1_483,solcap_snp_c2_2031,solcap_snp_c2_2034,solcap_snp_c2_2067,solcap_snp_c1_505,solcap_snp_c2_2071,solcap_snp_c1_506,solcap_snp_c2_2074,solcap_snp_c2_57465,solcap_snp_c2_57050,solcap_snp_c2_13889,solcap_snp_c1_4465,solcap_snp_c2_13907,solcap_snp_c2_13908,solcap_snp_c2_4522,solcap_snp_c1_1541,solcap_snp_c1_1547,solcap_snp_c2_4540,solcap_snp_c2_4543,solcap_snp_c2_4438,solcap_snp_c2_4439,solcap_snp_c2_4445,solcap_snp_c2_4446,solcap_snp_c2_4452,solcap_snp_c2_4453,solcap_snp_c1_1522,solcap_snp_c2_4459,solcap_snp_c2_4469,solcap_snp_c2_4472,solcap_snp_c2_4473,PotVar0134223,PotVar0134260,PotVar0134371,solcap_snp_c2_4476,solcap_snp_c2_4480,solcap_snp_c2_4486,solcap_snp_c1_1536,solcap_snp_c1_3142,solcap_snp_c2_9361,solcap_snp_c2_9362,solcap_snp_c2_9363,PotVar0069919,solcap_snp_c2_9371,solcap_snp_c2_9375,solcap_snp_c2_9377,PotVar0069881,PotVar0069878,solcap_snp_c2_9380,solcap_snp_c2_9381,PotVar0069827,PotVar0069719,solcap_snp_c2_9385,PotVar0069681,PotVar0069656,PotVar0069621,PotVar0069620,solcap_snp_c1_3151,solcap_snp_c2_9418,solcap_snp_c2_9431,solcap_snp_c1_3159,solcap_snp_c1_3141,solcap_snp_c2_9359,PotVar0092286,PotVar0092298,PotVar0092320,PotVar0092409,PotVar0092417,PotVar0092421,solcap_snp_c1_7521,solcap_snp_c1_7520,solcap_snp_c2_23396,solcap_snp_c1_7514,PotVar0092448,solcap_snp_c1_7505,PotVar0092628,PotVar0092660,PotVar0092712,PotVar0092762,PotVar0092769,PotVar0092770,PotVar0092813,solcap_snp_c2_23372,solcap_snp_c2_23355,solcap_snp_c2_23354,solcap_snp_c2_23347,solcap_snp_c1_7404,solcap_snp_c1_7400,PotVar0128963,PotVar0128900,PotVar0128886,solcap_snp_c2_23083,solcap_snp_c2_23075,solcap_snp_c1_7382,solcap_snp_c1_7405,solcap_snp_c2_15908,solcap_snp_c1_5112,solcap_snp_c1_5113,solcap_snp_c1_5114,solcap_snp_c1_5115,solcap_snp_c2_15923,solcap_snp_c2_15928,solcap_snp_c2_15929,solcap_snp_c1_5126,solcap_snp_c1_5137,solcap_snp_c2_16004,PotVar0093025,PotVar0093016,solcap_snp_c1_16193,PotVar0092928,PotVar0092924,solcap_snp_c1_16195,PotVar0092913,PotVar0092903,PotVar0092875,solcap_snp_c1_16198,PotVar0114969,PotVar0115020,PotVar0115037,PotVar0115039,PotVar0115046,PotVar0115090,PotVar0115101,PotVar0115107,PotVar0115139,solcap_snp_c2_38643,solcap_snp_c1_11479,solcap_snp_c1_11475,solcap_snp_c2_38635,solcap_snp_c2_38634,solcap_snp_c1_11485,solcap_snp_c2_38667,solcap_snp_c2_44105,solcap_snp_c2_44095,PotVar0115202,PotVar0115246,PotVar0115250,PotVar0115318,PotVar0115319,solcap_snp_c1_12978,solcap_snp_c1_12976,solcap_snp_c2_44120,PotVar0115415,PotVar0115433,solcap_snp_c1_13482,solcap_snp_c1_13483,PotVar0093513,PotVar0093528,PotVar0093555,PotVar0093572,solcap_snp_c1_13481,PotVar0093632,PotVar0093634,PotVar0093666,PotVar0093766,PotVar0093776,PotVar0093777,PotVar0093790,PotVar0093803,solcap_snp_c2_33495,solcap_snp_c2_33493,solcap_snp_c2_33492,solcap_snp_c2_33491,solcap_snp_c2_33489,solcap_snp_c2_33488,solcap_snp_c2_33473,solcap_snp_c1_10001,PotVar0119757,solcap_snp_c2_45472,PotVar0119732,PotVar0119730,PotVar0119726,solcap_snp_c2_45461,solcap_snp_c2_45448,solcap_snp_c2_45445,solcap_snp_c2_45436,PotVar0119638,solcap_snp_c2_56849,solcap_snp_c2_45188,solcap_snp_c2_45182,solcap_snp_c2_45181,solcap_snp_c2_45179,solcap_snp_c2_45177,solcap_snp_c1_13378,solcap_snp_c2_45176,solcap_snp_c2_45168,solcap_snp_c2_45161,solcap_snp_c2_45157,solcap_snp_c2_45155,solcap_snp_c2_45196,solcap_snp_c2_25205,solcap_snp_c2_25207,PotVar0133636,PotVar0133629,PotVar0133616,PotVar0133600,solcap_snp_c1_7993,solcap_snp_c2_25289,PotVar0104502,solcap_snp_c2_25212,solcap_snp_c2_25216,solcap_snp_c2_25219,solcap_snp_c1_7973,solcap_snp_c1_7980,solcap_snp_c2_25250,solcap_snp_c2_25261,solcap_snp_c2_25265,solcap_snp_c2_46329,solcap_snp_c2_19898,solcap_snp_c2_19897,solcap_snp_c1_6244,solcap_snp_c1_6240,PotVar0088456,PotVar0088454,PotVar0088450,solcap_snp_c2_19826,solcap_snp_c2_19787,solcap_snp_c2_19748,solcap_snp_c2_19746,solcap_snp_c1_6238,solcap_snp_c1_6228,PotVar0134030,PotVar0134031,PotVar0134999,solcap_snp_c2_35105,solcap_snp_c2_35110,solcap_snp_c1_10457,solcap_snp_c1_10461,solcap_snp_c2_35008,solcap_snp_c2_35049,solcap_snp_c2_35051,solcap_snp_c2_35053,solcap_snp_c2_35055,solcap_snp_c2_35057,solcap_snp_c2_35058,solcap_snp_c2_35060,solcap_snp_c2_35061,solcap_snp_c2_35062,solcap_snp_c2_35075,solcap_snp_c2_35078,solcap_snp_c2_26119,solcap_snp_c2_26003,solcap_snp_c2_26005,solcap_snp_c2_26006,solcap_snp_c2_26007,solcap_snp_c2_26011,solcap_snp_c2_26012,solcap_snp_c2_26014,solcap_snp_c2_26015,solcap_snp_c2_26041,PotVar0047459,PotVar0047551,PotVar0047595,PotVar0047616,PotVar0047676,PotVar0047699,PotVar0047712,PotVar0047713,PotVar0047717,solcap_snp_c1_8150,solcap_snp_c2_50620,solcap_snp_c2_33019,PotVar0047767,PotVar0047829,PotVar0047883,PotVar0047976,PotVar0047989,PotVar0047993,solcap_snp_c1_9918,PotVar0048012,PotVar0048065,solcap_snp_c2_28309,solcap_snp_c1_8707,solcap_snp_c1_8708,solcap_snp_c1_8709,solcap_snp_c2_28310,solcap_snp_c1_8713,solcap_snp_c2_28167,solcap_snp_c2_28174,solcap_snp_c2_28176,solcap_snp_c2_28186,solcap_snp_c2_28195,solcap_snp_c2_28212,solcap_snp_c2_28214,solcap_snp_c2_28217,solcap_snp_c2_28222,solcap_snp_c2_28223,solcap_snp_c2_28224,solcap_snp_c2_28227,solcap_snp_c2_28238,solcap_snp_c2_28252,PotVar0044701,PotVar0044691,PotVar0044685,PotVar0044681,PotVar0044676,PotVar0044653,PotVar0044651,PotVar0044649,PotVar0044634,solcap_snp_c2_42765,solcap_snp_c2_42763,solcap_snp_c2_42762,solcap_snp_c2_42761,solcap_snp_c2_42760,solcap_snp_c2_42759,solcap_snp_c2_42758,solcap_snp_c2_42757,solcap_snp_c2_42756,PotVar0044591,PotVar0044572,PotVar0044530,PotVar0044529,PotVar0044416,PotVar0044411,PotVar0044409,PotVar0044350,PotVar0044287,PotVar0044278,PotVar0044252,PotVar0044179,PotVar0044169,PotVar0044156,PotVar0044133,PotVar0044124,PotVar0044121,PotVar0044090,PotVar0044086,solcap_snp_c2_12404,solcap_snp_c2_12411,PotVar0044049,PotVar0044047,PotVar0044038,PotVar0043958,PotVar0043954,PotVar0043930,PotVar0043929,PotVar0043927,solcap_snp_c2_12527,solcap_snp_c2_12528,solcap_snp_c1_4044,solcap_snp_c2_12531,solcap_snp_c2_12549,solcap_snp_c2_12553,solcap_snp_c2_12565,solcap_snp_c2_12567,solcap_snp_c2_12573,solcap_snp_c2_12595,solcap_snp_c2_12596,solcap_snp_c2_12597,solcap_snp_c2_12600,solcap_snp_c2_12601,solcap_snp_c2_12618,solcap_snp_c2_12622,PotVar0043866,solcap_snp_c2_12696,solcap_snp_c2_51532,solcap_snp_c2_51513,solcap_snp_c2_51536,solcap_snp_c2_51533,PotVar0102877,PotVar0102858,PotVar0102857,PotVar0102815,PotVar0102788,PotVar0102784,PotVar0102764,PotVar0102724,solcap_snp_c2_16847,solcap_snp_c2_16846,solcap_snp_c1_5446,solcap_snp_c2_16843,solcap_snp_c2_16831,solcap_snp_c2_30475,solcap_snp_c1_9206,solcap_snp_c1_9217,PotVar0102572,solcap_snp_c2_30428,solcap_snp_c2_30460,PotVar0128548,solcap_snp_c2_30471,PotVar0128565,solcap_snp_c1_5968,solcap_snp_c2_18549,solcap_snp_c1_5970,solcap_snp_c2_18552,solcap_snp_c2_18573,PotVar0037237,solcap_snp_c2_18590,solcap_snp_c1_5981,solcap_snp_c2_18664,solcap_snp_c2_18684,PotVar0037157,PotVar0037132,PotVar0037131,PotVar0037122,PotVar0037084,PotVar0037074,PotVar0037055,PotVar0037040,PotVar0037035,solcap_snp_c2_18759,solcap_snp_c1_8834,PotVar0037013,PotVar0037004,PotVar0037003,PotVar0037001,PotVar0036997,solcap_snp_c1_8821,solcap_snp_c2_28840,solcap_snp_c2_28846,solcap_snp_c2_28848,solcap_snp_c2_28849,solcap_snp_c2_28850,solcap_snp_c2_28851,solcap_snp_c2_28872,PotVar0036855,PotVar0036843,PotVar0036819,PotVar0036767,PotVar0036750,PotVar0036731,PotVar0036701,PotVar0036687,solcap_snp_c1_8830,solcap_snp_c2_28903,PotVar0036629,solcap_snp_c2_33273,solcap_snp_c2_33278,solcap_snp_c2_33277,solcap_snp_c2_33276,solcap_snp_c2_29015,solcap_snp_c1_8838,solcap_snp_c2_29020,solcap_snp_c2_29025,solcap_snp_c2_29027,solcap_snp_c2_29043,solcap_snp_c2_29044,solcap_snp_c2_29046,solcap_snp_c2_29047,solcap_snp_c2_29071,PotVar0096166,PotVar0096164,PotVar0096094,solcap_snp_c2_54456,solcap_snp_c1_9776,solcap_snp_c1_9777,solcap_snp_c2_32644,solcap_snp_c1_9779,PotVar0113563,PotVar0113623,PotVar0113635,PotVar0113663,PotVar0113742,PotVar0113745,solcap_snp_c2_32650,solcap_snp_c1_9785,solcap_snp_c2_32667,solcap_snp_c1_9786,solcap_snp_c2_32677,solcap_snp_c2_32702,solcap_snp_c2_32704,solcap_snp_c2_32710,solcap_snp_c2_51957,solcap_snp_c2_51954,solcap_snp_c1_8522,solcap_snp_c2_27452,solcap_snp_c1_8508,solcap_snp_c2_27485,PotVar0088806,PotVar0088803,PotVar0088794,solcap_snp_c1_8518,solcap_snp_c1_8520,solcap_snp_c2_53516,PotVar0088789,PotVar0088783,PotVar0088766,PotVar0088760,PotVar0088757,PotVar0088739,PotVar0088738,PotVar0088710,PotVar0088709,solcap_snp_c1_14884,PotVar0088684,PotVar0088679,solcap_snp_c1_15756,solcap_snp_c2_54204,PotVar0110149,PotVar0110136,solcap_snp_c1_7739,solcap_snp_c2_24404,PotVar0110096,PotVar0110073,PotVar0110066,PotVar0110060,PotVar0110053,solcap_snp_c1_7740,solcap_snp_c2_50041,solcap_snp_c2_44855,PotVar0108806,PotVar0108812,PotVar0108833,solcap_snp_c2_57750,solcap_snp_c2_57767,PotVar0108896,PotVar0108902,PotVar0108913,PotVar0108928,PotVar0108990,PotVar0108992,PotVar0108998,solcap_snp_c2_34124,solcap_snp_c2_34121,solcap_snp_c2_34117,solcap_snp_c2_34110,solcap_snp_c2_34109,solcap_snp_c2_34179,solcap_snp_c2_34103,solcap_snp_c2_19533,solcap_snp_c2_19534,solcap_snp_c2_52253,solcap_snp_c1_15260,solcap_snp_c2_30104,PotVar0063939,PotVar0063938,solcap_snp_c2_30037,solcap_snp_c2_30044,solcap_snp_c2_30053,solcap_snp_c2_30054,solcap_snp_c2_30055,PotVar0063904,PotVar0063885,PotVar0063845,PotVar0063844,solcap_snp_c1_9105,solcap_snp_c2_48951,solcap_snp_c2_48953,PotVar0063768,PotVar0063767,PotVar0063766,PotVar0063758,PotVar0063756,PotVar0063755,PotVar0063749,PotVar0063725,PotVar0063715,PotVar0063713,PotVar0063704,PotVar0063703,PotVar0063693,PotVar0063692,PotVar0063641,PotVar0063624,solcap_snp_c2_26893,PotVar0063591,PotVar0063585,solcap_snp_c1_8380,solcap_snp_c2_26935,solcap_snp_c2_26936,solcap_snp_c2_26938,solcap_snp_c2_49541,solcap_snp_c1_13230,solcap_snp_c2_12742,solcap_snp_c2_12746,solcap_snp_c2_12747,solcap_snp_c2_12749,solcap_snp_c2_12751,solcap_snp_c1_15451,solcap_snp_c2_52856,solcap_snp_c2_52857,solcap_snp_c2_47911,solcap_snp_c2_47906,solcap_snp_c2_47904,solcap_snp_c1_14166,solcap_snp_c1_14165,solcap_snp_c2_47903,solcap_snp_c2_47901,solcap_snp_c2_47900,solcap_snp_c2_47896,solcap_snp_c1_14173,solcap_snp_c2_47917,solcap_snp_c2_19645,solcap_snp_c2_19638,solcap_snp_c2_19632,solcap_snp_c2_19631,solcap_snp_c2_19630,solcap_snp_c2_17281,solcap_snp_c2_17283,solcap_snp_c2_17284,solcap_snp_c1_5707,solcap_snp_c2_17289,solcap_snp_c2_17290,solcap_snp_c2_17294,solcap_snp_c1_5710,solcap_snp_c2_17301,solcap_snp_c1_5713,solcap_snp_c2_17304,solcap_snp_c2_17305,solcap_snp_c2_17311,solcap_snp_c2_17317,solcap_snp_c2_17318,solcap_snp_c2_17319,solcap_snp_c2_17321,solcap_snp_c2_17323,solcap_snp_c2_57003,solcap_snp_c2_57002,solcap_snp_c1_14314,solcap_snp_c2_48358,solcap_snp_c2_33774,solcap_snp_c2_33772,solcap_snp_c1_9474,solcap_snp_c2_31354,solcap_snp_c2_30904,solcap_snp_c2_30905,solcap_snp_c2_30907,solcap_snp_c2_7782,solcap_snp_c1_2684,solcap_snp_c1_2686,solcap_snp_c1_2687,solcap_snp_c2_7785,solcap_snp_c2_28516,solcap_snp_c2_28511,solcap_snp_c2_57849,PotVar0088658,solcap_snp_c2_50849,solcap_snp_c2_34096,solcap_snp_c2_34090,solcap_snp_c2_53878,solcap_snp_c2_53880,solcap_snp_c2_53881,solcap_snp_c1_15689,solcap_snp_c2_34087,solcap_snp_c2_34085,solcap_snp_c2_34078,solcap_snp_c2_34075,solcap_snp_c2_34072,solcap_snp_c2_34069,solcap_snp_c2_34565,solcap_snp_c2_34564,solcap_snp_c2_42298,solcap_snp_c2_42293,solcap_snp_c2_42290,solcap_snp_c2_2122,solcap_snp_c2_2103,solcap_snp_c2_2102,solcap_snp_c1_516,solcap_snp_c2_2178,PotVar0076384,PotVar0076393,solcap_snp_c2_2183,solcap_snp_c2_51067,solcap_snp_c2_19951,solcap_snp_c2_19949,solcap_snp_c2_19946,solcap_snp_c2_19942,solcap_snp_c2_19940,PotVar0076451,solcap_snp_c2_19939,PotVar0076488,solcap_snp_c1_6252,solcap_snp_c1_6262,solcap_snp_c2_2852,solcap_snp_c2_2850,solcap_snp_c2_2844,solcap_snp_c2_2843,solcap_snp_c2_2842,solcap_snp_c2_2840,solcap_snp_c2_2839,solcap_snp_c1_848,solcap_snp_c2_2837,solcap_snp_c1_846,solcap_snp_c2_2832,solcap_snp_c1_844,solcap_snp_c2_2826,solcap_snp_c2_8167,solcap_snp_c2_8169,solcap_snp_c2_8172,solcap_snp_c2_5915,solcap_snp_c2_5914,solcap_snp_c2_5913,solcap_snp_c2_5909,solcap_snp_c2_5907,solcap_snp_c2_20307,solcap_snp_c2_20299,solcap_snp_c2_29489,solcap_snp_c2_29490,solcap_snp_c2_29491,solcap_snp_c2_29492,solcap_snp_c2_29494,solcap_snp_c2_29496,solcap_snp_c1_8987,solcap_snp_c2_29498,solcap_snp_c2_29478,solcap_snp_c2_29479,solcap_snp_c2_29286,solcap_snp_c2_29284,solcap_snp_c2_29283,solcap_snp_c2_29282,solcap_snp_c2_29280,solcap_snp_c2_19426,solcap_snp_c1_6130,solcap_snp_c1_6131,solcap_snp_c2_19429,solcap_snp_c2_19431,solcap_snp_c2_19432,solcap_snp_c2_19433,solcap_snp_c1_6136,solcap_snp_c1_6138,solcap_snp_c1_6140,solcap_snp_c1_6142,solcap_snp_c2_19437,solcap_snp_c2_19439,solcap_snp_c2_19442,solcap_snp_c2_19444,solcap_snp_c2_47925,solcap_snp_c2_47923,solcap_snp_c2_47922,solcap_snp_c2_47921,solcap_snp_c2_47920,solcap_snp_c2_51063,solcap_snp_c2_30254,solcap_snp_c2_30255,solcap_snp_c2_30269,solcap_snp_c1_9169,solcap_snp_c2_30272,solcap_snp_c1_9174,solcap_snp_c2_30288,solcap_snp_c2_30293,solcap_snp_c1_11442,PotVar0060614,solcap_snp_c2_50362,solcap_snp_c2_32809,solcap_snp_c2_32803,solcap_snp_c2_32802,solcap_snp_c2_57660,solcap_snp_c1_11719,solcap_snp_c1_14542,solcap_snp_c2_49265,solcap_snp_c2_49249,solcap_snp_c2_49246,solcap_snp_c2_49245,solcap_snp_c2_49243,solcap_snp_c2_56491,solcap_snp_c2_41471,solcap_snp_c2_41470,solcap_snp_c2_41467,solcap_snp_c2_41463,solcap_snp_c1_12163,solcap_snp_c1_12162,solcap_snp_c1_12161,solcap_snp_c2_56757,solcap_snp_c2_2817,solcap_snp_c2_2816,solcap_snp_c2_55227,solcap_snp_c2_2754,solcap_snp_c1_823,solcap_snp_c2_2748,solcap_snp_c1_821,solcap_snp_c1_819,solcap_snp_c2_2747,solcap_snp_c2_2746,solcap_snp_c2_2745,solcap_snp_c2_2744,solcap_snp_c2_2780,solcap_snp_c2_32282,solcap_snp_c2_32302,solcap_snp_c2_32309,solcap_snp_c2_32310,solcap_snp_c2_32317,solcap_snp_c2_51320,solcap_snp_c2_51329,solcap_snp_c2_45770,solcap_snp_c2_45751,solcap_snp_c1_13586,solcap_snp_c2_45759,solcap_snp_c2_44331,solcap_snp_c2_44319,solcap_snp_c2_44307,solcap_snp_c2_44305,solcap_snp_c2_44304,solcap_snp_c2_44303,solcap_snp_c2_44335,solcap_snp_c2_44334,solcap_snp_c1_16676,solcap_snp_c1_15045,solcap_snp_c2_51369,solcap_snp_c1_15044,solcap_snp_c2_51367,solcap_snp_c2_51374,solcap_snp_c1_15048,solcap_snp_c1_15046,solcap_snp_c2_51372,solcap_snp_c2_51376,solcap_snp_c2_51375,solcap_snp_c1_14108,PotVar0107820,solcap_snp_c2_33405,solcap_snp_c2_33403,solcap_snp_c2_33400,solcap_snp_c2_33386,solcap_snp_c2_33381,solcap_snp_c2_33422,PotVar0134734,solcap_snp_c2_48182,solcap_snp_c2_48184,PotVar0134751,PotVar0134764,solcap_snp_c1_14271,PotVar0134765,PotVar0134793,PotVar0134798,PotVar0134851,PotVar0134854,solcap_snp_c1_12166,solcap_snp_c1_11562,solcap_snp_c2_18873,PotVar0086588,PotVar0086596,PotVar0086598,PotVar0086604,PotVar0086639,PotVar0086640,PotVar0086641,PotVar0086646,PotVar0086703,PotVar0086766,PotVar0086773,PotVar0086782,solcap_snp_c2_18894,solcap_snp_c2_18895,PotVar0086804,PotVar0086805,PotVar0086811,PotVar0086813,PotVar0086820,PotVar0086822,PotVar0086907,PotVar0130218,solcap_snp_c2_18918,solcap_snp_c2_18922,solcap_snp_c2_18924,solcap_snp_c2_18943,PotVar0123525,PotVar0123481,PotVar0123452,PotVar0123405,solcap_snp_c2_41044,solcap_snp_c2_15859,PotVar0076952,PotVar0076974,PotVar0076979,PotVar0077006,PotVar0077015,PotVar0077021,PotVar0077030,PotVar0077039,PotVar0077054,PotVar0077081,PotVar0077092,PotVar0077094,PotVar0077179,PotVar0077225,solcap_snp_c1_5100,solcap_snp_c2_15847,solcap_snp_c2_15840,solcap_snp_c2_15839,solcap_snp_c2_15836,solcap_snp_c2_15835,solcap_snp_c2_15829,solcap_snp_c2_15827,solcap_snp_c2_15826,solcap_snp_c2_15825,solcap_snp_c2_15824,solcap_snp_c2_15818,solcap_snp_c1_5094,PotVar0077378,PotVar0077413,solcap_snp_c2_15803,solcap_snp_c2_15796,solcap_snp_c2_44289,solcap_snp_c2_44274,solcap_snp_c2_44273,PotVar0077500,PotVar0077523,PotVar0077528,PotVar0077537,PotVar0077613,solcap_snp_c2_50704,solcap_snp_c2_50702,PotVar0125199,PotVar0125284,PotVar0125352,PotVar0125359,PotVar0125369,PotVar0125664,PotVar0125665,solcap_snp_c1_14766,solcap_snp_c1_14763,solcap_snp_c2_50153,solcap_snp_c2_50151,solcap_snp_c2_50150,solcap_snp_c2_51053,solcap_snp_c2_51052,solcap_snp_c2_51051,solcap_snp_c1_15416,solcap_snp_c2_51749,solcap_snp_c2_40295,solcap_snp_c2_40294,PotVar0103018,PotVar0103074,PotVar0103095,PotVar0103097,PotVar0103109,PotVar0103161,PotVar0103166,PotVar0103192,PotVar0103197,solcap_snp_c2_40290,solcap_snp_c2_40320,PotVar0103302,PotVar0103303,PotVar0103305,PotVar0103331,PotVar0103335,PotVar0103342,PotVar0103351,PotVar0103352,PotVar0103391,PotVar0103431,solcap_snp_c1_15692,solcap_snp_c2_53902,solcap_snp_c2_53903,solcap_snp_c2_53914,solcap_snp_c2_28580,PotVar0121939,PotVar0121994,PotVar0122020,PotVar0122021,PotVar0122026,PotVar0122082,solcap_snp_c2_28641,solcap_snp_c2_28522,solcap_snp_c2_28535,solcap_snp_c2_28538,solcap_snp_c1_8769,solcap_snp_c2_28548,solcap_snp_c2_28549,solcap_snp_c2_28550,solcap_snp_c2_28561,solcap_snp_c2_28562,solcap_snp_c2_28563,solcap_snp_c2_28572,solcap_snp_c2_28579,solcap_snp_c1_8774,solcap_snp_c2_28609,solcap_snp_c1_8778,solcap_snp_c2_28615,solcap_snp_c2_28632,solcap_snp_c2_28633,solcap_snp_c2_28634,solcap_snp_c2_28635,solcap_snp_c2_28637,solcap_snp_c2_49349,solcap_snp_c2_49342,solcap_snp_c2_49337,solcap_snp_c2_49379,solcap_snp_c2_49378,solcap_snp_c2_49377,solcap_snp_c2_49375,solcap_snp_c2_49361,solcap_snp_c2_49354,solcap_snp_c1_2614,PotVar0063529,PotVar0063469,PotVar0063446,PotVar0063427,PotVar0063421,solcap_snp_c2_44529,solcap_snp_c2_44530,solcap_snp_c1_13099,solcap_snp_c1_13116,solcap_snp_c2_44545,solcap_snp_c2_44472,solcap_snp_c2_44474,PotVar0063333,PotVar0063328,PotVar0063310,PotVar0063301,PotVar0063283,PotVar0063187,PotVar0063169,PotVar0063167,solcap_snp_c1_13094,solcap_snp_c2_52694,solcap_snp_c2_52699,solcap_snp_c2_52700,solcap_snp_c2_52702,solcap_snp_c2_53854,solcap_snp_c2_49598,solcap_snp_c2_49592,PotVar0063115,solcap_snp_c2_49604,PotVar0063069,solcap_snp_c2_49603,solcap_snp_c2_49602,solcap_snp_c2_52025,PotVar0096167,PotVar0096178,PotVar0096213,solcap_snp_c2_5332,PotVar0096216,PotVar0096218,PotVar0096222,PotVar0096223,solcap_snp_c2_34758,PotVar0096252,solcap_snp_c2_34710,solcap_snp_c2_34709,solcap_snp_c2_34705,solcap_snp_c2_34698,solcap_snp_c2_34717,solcap_snp_c2_36731,solcap_snp_c2_36737,solcap_snp_c1_10945,solcap_snp_c2_36741,solcap_snp_c2_36745,solcap_snp_c2_36748,PotVar0100113,PotVar0100132,PotVar0100143,PotVar0100147,PotVar0100204,PotVar0100215,solcap_snp_c2_36760,solcap_snp_c2_36763,PotVar0100244,PotVar0100280,PotVar0100283,solcap_snp_c2_36777,solcap_snp_c2_36779,solcap_snp_c2_36780,solcap_snp_c2_36781,solcap_snp_c2_58288,solcap_snp_c2_48441,PotVar0100350,PotVar0100351,PotVar0100388,PotVar0100389,PotVar0100457,solcap_snp_c2_48447,PotVar0100459,PotVar0100470,PotVar0100471,PotVar0081130,PotVar0081131,PotVar0081239,PotVar0081240,solcap_snp_c2_56726,solcap_snp_c2_19144,solcap_snp_c2_19135,solcap_snp_c2_19125,solcap_snp_c2_19085,solcap_snp_c2_19080,solcap_snp_c2_19075,solcap_snp_c2_57559,solcap_snp_c2_19020,solcap_snp_c2_19013,solcap_snp_c2_19209,solcap_snp_c2_34604,PotVar0119169,PotVar0119168,PotVar0119156,PotVar0119145,PotVar0119128,PotVar0119121,solcap_snp_c1_10390,solcap_snp_c2_34566,solcap_snp_c1_10384,solcap_snp_c2_34587,solcap_snp_c2_34590,solcap_snp_c2_34608,solcap_snp_c2_34632,PotVar0119110,PotVar0119101,solcap_snp_c2_34634,solcap_snp_c2_34635,solcap_snp_c2_34636,solcap_snp_c2_34639,PotVar0119072,solcap_snp_c2_34640,solcap_snp_c2_34655,PotVar0097375,solcap_snp_c2_26631,solcap_snp_c1_8297,PotVar0097423,PotVar0097439,PotVar0097446,PotVar0097448,PotVar0097455,PotVar0097462,PotVar0097485,PotVar0097491,PotVar0097493,solcap_snp_c1_8291,solcap_snp_c1_8282,solcap_snp_c2_26653,PotVar0097536,PotVar0097603,PotVar0097615,solcap_snp_c1_16495,PotVar0024071,solcap_snp_c1_5578,PotVar0023981,solcap_snp_c1_5483,PotVar0023957,PotVar0023867,PotVar0023850,PotVar0023817,PotVar0023745,PotVar0023743,PotVar0023689,PotVar0023678,solcap_snp_c2_16994,solcap_snp_c2_16995,solcap_snp_c2_16998,solcap_snp_c2_16999,solcap_snp_c2_17010,solcap_snp_c2_17025,solcap_snp_c1_5546,solcap_snp_c2_4672,solcap_snp_c2_17060,solcap_snp_c1_5560,solcap_snp_c1_5587,solcap_snp_c2_17094,solcap_snp_c1_5614,solcap_snp_c2_17113,solcap_snp_c2_17133,solcap_snp_c2_46266,solcap_snp_c2_46251,solcap_snp_c2_46239,solcap_snp_c1_13747,solcap_snp_c1_13743,solcap_snp_c2_16159,solcap_snp_c2_16222,solcap_snp_c1_5155,solcap_snp_c2_16068,solcap_snp_c2_16135,solcap_snp_c1_8758,solcap_snp_c1_8754,solcap_snp_c2_28433,solcap_snp_c2_28428,solcap_snp_c2_28426,PotVar0023602,PotVar0023583,PotVar0023582,PotVar0023580,PotVar0023564,PotVar0023561,solcap_snp_c1_8723,PotVar0023506,PotVar0023483,PotVar0023429,PotVar0023409,PotVar0023375,PotVar0023337,PotVar0023333,PotVar0023309,PotVar0023288,solcap_snp_c1_8765,solcap_snp_c1_8763,solcap_snp_c2_28483,solcap_snp_c2_28482,solcap_snp_c2_28481,PotVar0023261,solcap_snp_c2_28476,PotVar0023184,solcap_snp_c2_28475,PotVar0023147,PotVar0023144,PotVar0023140,solcap_snp_c1_8760,solcap_snp_c1_8759,solcap_snp_c2_28474,solcap_snp_c2_28442,PotVar0130602,PotVar0130611,PotVar0130626,PotVar0130628,PotVar0130658,PotVar0130659,solcap_snp_c2_3363,solcap_snp_c1_1053,solcap_snp_c2_3353,solcap_snp_c2_3337,solcap_snp_c2_3325,solcap_snp_c2_3323,solcap_snp_c2_3320,solcap_snp_c1_1029,solcap_snp_c1_1020,solcap_snp_c1_1000,PotVar0114434,PotVar0114443,PotVar0114476,PotVar0114492,PotVar0114551,PotVar0114613,solcap_snp_c1_988,solcap_snp_c1_992,solcap_snp_c1_14388,solcap_snp_c1_14393,solcap_snp_c1_14394,solcap_snp_c2_48673,solcap_snp_c2_48597,solcap_snp_c1_14370,solcap_snp_c2_39029,solcap_snp_c2_39031,solcap_snp_c2_39034,solcap_snp_c2_39035,solcap_snp_c2_39080,solcap_snp_c2_39082,solcap_snp_c2_39083,solcap_snp_c2_39084,solcap_snp_c2_39085,solcap_snp_c2_39086,solcap_snp_c1_11572,solcap_snp_c1_3613,solcap_snp_c1_3612,PotVar0011225,solcap_snp_c1_3608,PotVar0011226,PotVar0011236,PotVar0011300,PotVar0011302,solcap_snp_c2_11005,solcap_snp_c2_10966,solcap_snp_c2_10963,solcap_snp_c1_3598,solcap_snp_c1_3597,solcap_snp_c1_3596,solcap_snp_c2_10958,solcap_snp_c2_10956,PotVar0011360,PotVar0011392,PotVar0011522,PotVar0011562,PotVar0011673,PotVar0011674,PotVar0011708,PotVar0011713,solcap_snp_c2_10906,PotVar0011750,PotVar0011794,PotVar0011839,PotVar0011850,solcap_snp_c2_11018,PotVar0011879,PotVar0011891,PotVar0011917,PotVar0012050,solcap_snp_c2_10896,solcap_snp_c2_39254,solcap_snp_c2_39253,solcap_snp_c2_39251,solcap_snp_c2_39244,solcap_snp_c2_39239,PotVar0012073,PotVar0012076,solcap_snp_c2_39231,solcap_snp_c2_39227,solcap_snp_c2_39216,solcap_snp_c2_39265,solcap_snp_c2_54955,solcap_snp_c2_32193,solcap_snp_c2_32211,solcap_snp_c2_32225,solcap_snp_c2_32227,PotVar0012115,solcap_snp_c1_9651,solcap_snp_c1_9652,solcap_snp_c2_4030,solcap_snp_c2_4041,solcap_snp_c2_4045,PotVar0012274,PotVar0012284,PotVar0012325,PotVar0012337,PotVar0012338,PotVar0012370,PotVar0012376,PotVar0012377,PotVar0012441,PotVar0012446,solcap_snp_c2_4048,PotVar0012533,solcap_snp_c1_1368,solcap_snp_c2_4054,solcap_snp_c1_1383,solcap_snp_c2_4100,solcap_snp_c1_1391,solcap_snp_c1_1394,solcap_snp_c1_1395,solcap_snp_c1_1400,solcap_snp_c2_4138,solcap_snp_c2_4157,solcap_snp_c2_4158,solcap_snp_c2_4161,solcap_snp_c2_4165,solcap_snp_c1_1417,solcap_snp_c2_4175,solcap_snp_c1_1420,solcap_snp_c2_4181,solcap_snp_c2_4187,solcap_snp_c2_4192,solcap_snp_c2_3934,solcap_snp_c2_3941,solcap_snp_c2_3943,solcap_snp_c2_3944,solcap_snp_c2_3945,solcap_snp_c2_3948,solcap_snp_c2_3949,solcap_snp_c2_3950,solcap_snp_c1_1341,solcap_snp_c2_3952,solcap_snp_c2_3953,solcap_snp_c2_3955,solcap_snp_c2_3960,solcap_snp_c2_3962,solcap_snp_c2_3963,solcap_snp_c2_3966,solcap_snp_c2_3969,solcap_snp_c2_3970,solcap_snp_c2_3976,solcap_snp_c2_3980,solcap_snp_c2_3981,solcap_snp_c2_3983,solcap_snp_c1_1352,solcap_snp_c2_3986,solcap_snp_c2_3996,solcap_snp_c2_3997,PotVar0073356,PotVar0073342,PotVar0073321,PotVar0073230,solcap_snp_c2_4013,solcap_snp_c2_4021,solcap_snp_c2_4024,solcap_snp_c2_35470,solcap_snp_c2_35465,solcap_snp_c1_10539,solcap_snp_c2_35446,solcap_snp_c2_35433,solcap_snp_c2_35424,solcap_snp_c2_35422,solcap_snp_c1_10528,solcap_snp_c2_35406,solcap_snp_c2_35376,solcap_snp_c2_35374,solcap_snp_c2_35372,solcap_snp_c2_35411,solcap_snp_c2_52240,solcap_snp_c2_52241,solcap_snp_c2_13322,solcap_snp_c2_13317,solcap_snp_c2_13316,solcap_snp_c2_13304,solcap_snp_c2_13273,solcap_snp_c1_4271,solcap_snp_c2_13242,solcap_snp_c2_13211,solcap_snp_c1_4248,solcap_snp_c2_13195,solcap_snp_c2_13194,solcap_snp_c2_13193,solcap_snp_c1_4243,solcap_snp_c2_13180,solcap_snp_c2_13177,solcap_snp_c1_4238,solcap_snp_c1_4237,PotVar0133858,solcap_snp_c2_13163,PotVar0133840,PotVar0133837,PotVar0133829,PotVar0133826,PotVar0133799,PotVar0133780,PotVar0133733,PotVar0133677,solcap_snp_c1_4231,PotVar0133660,solcap_snp_c2_13138,solcap_snp_c2_13133,solcap_snp_c1_4228,solcap_snp_c2_13099,solcap_snp_c1_4222,solcap_snp_c1_4213,solcap_snp_c1_4206,solcap_snp_c1_4282,solcap_snp_c1_15470,PotVar0034334,PotVar0034302,PotVar0034287,PotVar0034277,PotVar0034276,PotVar0034240,PotVar0034218,PotVar0133086,PotVar0133046,PotVar0133035,PotVar0133012,PotVar0132983,PotVar0132979,PotVar0132977,PotVar0132971,PotVar0132961,solcap_snp_c2_50238,solcap_snp_c2_50247,solcap_snp_c2_52515,solcap_snp_c2_52517,solcap_snp_c2_52518,solcap_snp_c2_52519,solcap_snp_c2_52521,solcap_snp_c2_52522,solcap_snp_c2_52523,solcap_snp_c2_46427,solcap_snp_c2_46431,solcap_snp_c1_13785,PotVar0117676,solcap_snp_c1_1512,PotVar0117718,PotVar0117721,PotVar0117734,PotVar0117751,PotVar0117765,PotVar0117779,PotVar0117781,solcap_snp_c2_54609,solcap_snp_c2_54613,solcap_snp_c2_49642,solcap_snp_c2_49770,solcap_snp_c2_49764,solcap_snp_c1_14668,solcap_snp_c1_14676,solcap_snp_c1_14674,solcap_snp_c1_15780,solcap_snp_c2_58234,PotVar0107325,PotVar0107313,solcap_snp_c2_58236,solcap_snp_c2_52898,solcap_snp_c2_23459,solcap_snp_c2_23439,solcap_snp_c2_23431,solcap_snp_c2_38526,solcap_snp_c2_46028,solcap_snp_c2_46029,solcap_snp_c2_4383,solcap_snp_c2_4385,solcap_snp_c2_4387,solcap_snp_c2_4391,solcap_snp_c2_4392,solcap_snp_c2_4397,solcap_snp_c2_4400,solcap_snp_c2_4401,solcap_snp_c2_4404,solcap_snp_c2_4405,solcap_snp_c2_33626,solcap_snp_c2_33627,solcap_snp_c1_9490,solcap_snp_c2_562,solcap_snp_c1_449,PotVar0012806,PotVar0012788,PotVar0012749,solcap_snp_c2_1915,solcap_snp_c2_1916,solcap_snp_c2_1918,PotVar0012710,solcap_snp_c2_1908,solcap_snp_c2_1912,solcap_snp_c2_53558,solcap_snp_c2_53559,solcap_snp_c2_58369,solcap_snp_c1_16737,solcap_snp_c1_16738,solcap_snp_c2_57401,solcap_snp_c1_8210,solcap_snp_c2_26519,solcap_snp_c2_26516,solcap_snp_c2_26509,solcap_snp_c2_44951,solcap_snp_c2_19537,solcap_snp_c2_51250,solcap_snp_c2_37404,solcap_snp_c2_37406,solcap_snp_c2_37407,solcap_snp_c1_958,PotVar0054617,PotVar0054638,PotVar0054663,solcap_snp_c2_3207,solcap_snp_c2_3203,solcap_snp_c2_3202,PotVar0054690,PotVar0007437,PotVar0007465,PotVar0007532,PotVar0007597,solcap_snp_c2_16279,solcap_snp_c2_22761,solcap_snp_c2_57542,solcap_snp_c2_22758,solcap_snp_c2_1511,solcap_snp_c2_1512,solcap_snp_c2_55120,solcap_snp_c2_55124,solcap_snp_c2_1514,solcap_snp_c2_1516,PotVar0111222,PotVar0111212,PotVar0111209,solcap_snp_c2_1483,solcap_snp_c2_1484,solcap_snp_c2_1485,solcap_snp_c2_1486,solcap_snp_c1_364,PotVar0082160,solcap_snp_c2_4200,solcap_snp_c2_678,solcap_snp_c2_680,solcap_snp_c2_681,solcap_snp_c1_216,solcap_snp_c2_685,solcap_snp_c2_699,solcap_snp_c2_700,solcap_snp_c2_701,solcap_snp_c1_2319,solcap_snp_c2_6333,solcap_snp_c2_58249,solcap_snp_c2_55046,solcap_snp_c2_56183,solcap_snp_c2_56172,solcap_snp_c2_20470,solcap_snp_c2_20469,solcap_snp_c1_6478,solcap_snp_c2_20464,solcap_snp_c2_20454,solcap_snp_c2_20481,solcap_snp_c2_20479,solcap_snp_c1_8013,solcap_snp_c2_27657,solcap_snp_c2_27648,solcap_snp_c2_27644,solcap_snp_c2_52833,solcap_snp_c2_32638,solcap_snp_c2_27652,solcap_snp_c2_27635,solcap_snp_c2_12769,solcap_snp_c2_12770,solcap_snp_c1_4068,solcap_snp_c2_12758,solcap_snp_c2_12761,solcap_snp_c1_4076,solcap_snp_c2_12768,solcap_snp_c2_12780,solcap_snp_c2_12783,solcap_snp_c2_12784,solcap_snp_c2_12786,solcap_snp_c2_12788,solcap_snp_c2_12789,solcap_snp_c1_4082,solcap_snp_c1_4083,solcap_snp_c1_4084,solcap_snp_c1_4085,solcap_snp_c1_4087,solcap_snp_c1_4088,solcap_snp_c1_4089,solcap_snp_c1_4090,solcap_snp_c2_12790,solcap_snp_c2_12791,solcap_snp_c2_12781,solcap_snp_c2_12782,solcap_snp_c2_12794,solcap_snp_c2_12796,solcap_snp_c2_12803,solcap_snp_c1_4094,solcap_snp_c2_12811,solcap_snp_c1_4103,solcap_snp_c2_44828,solcap_snp_c2_44827,solcap_snp_c2_44820,solcap_snp_c2_44819,solcap_snp_c2_44818,solcap_snp_c2_44817,solcap_snp_c2_44815,solcap_snp_c2_44814,solcap_snp_c2_44812,solcap_snp_c2_44811,solcap_snp_c2_44805,solcap_snp_c2_44804,solcap_snp_c2_44836,PotVar0082836,PotVar0082775,solcap_snp_c2_44835,solcap_snp_c2_44834,solcap_snp_c2_44833,solcap_snp_c2_45884,solcap_snp_c2_45886,solcap_snp_c2_56074,solcap_snp_c1_12805,solcap_snp_c1_12804,solcap_snp_c1_12798,solcap_snp_c1_12797,solcap_snp_c2_43434,PotVar0051027,PotVar0051099,PotVar0051101,PotVar0051115,PotVar0051178,PotVar0051195,PotVar0051239,PotVar0051243,PotVar0051363,PotVar0051418,solcap_snp_c2_43444,solcap_snp_c2_43437,solcap_snp_c1_12802,solcap_snp_c1_6192,solcap_snp_c1_6166,PotVar0051475,PotVar0051493,PotVar0051497,solcap_snp_c2_19556,PotVar0051499,PotVar0051520,PotVar0051583,PotVar0051600,solcap_snp_c2_19569,solcap_snp_c1_6183,PotVar0051650,PotVar0051651,solcap_snp_c1_13515,PotVar0051698,solcap_snp_c2_45570,solcap_snp_c2_45567,solcap_snp_c2_56977,solcap_snp_c2_54867,solcap_snp_c1_13996,solcap_snp_c1_16459,PotVar0058491,PotVar0058492,PotVar0058493,solcap_snp_c2_51155,PotVar0058503,solcap_snp_c2_39499,solcap_snp_c2_39494,solcap_snp_c2_39488,solcap_snp_c2_39509,solcap_snp_c2_14636,solcap_snp_c2_14637,solcap_snp_c2_14639,solcap_snp_c2_14640,solcap_snp_c2_52532,solcap_snp_c2_52544,solcap_snp_c2_52543,solcap_snp_c2_39840,solcap_snp_c1_11779,solcap_snp_c1_11777,PotVar0093848,PotVar0093997,PotVar0094024,PotVar0094025,PotVar0094049,PotVar0094054,solcap_snp_c1_11907,solcap_snp_c2_4196,solcap_snp_c2_4034,PotVar0129381,PotVar0129355,PotVar0129337,PotVar0129270,PotVar0129259,solcap_snp_c1_16413,solcap_snp_c1_16414,solcap_snp_c2_40879,solcap_snp_c2_40867,solcap_snp_c2_40863,solcap_snp_c2_40858,solcap_snp_c2_40848,solcap_snp_c1_15041,solcap_snp_c2_51346,PotVar0101957,PotVar0101947,PotVar0101941,PotVar0101916,PotVar0101905,solcap_snp_c2_43031,solcap_snp_c2_43032,solcap_snp_c2_43049,solcap_snp_c2_42961,solcap_snp_c2_42964,PotVar0101868,PotVar0101834,PotVar0101814,PotVar0101811,PotVar0101759,PotVar0101691,PotVar0101674,PotVar0101643,solcap_snp_c2_43012,PotVar0103657,PotVar0103703,PotVar0103704,PotVar0103780,PotVar0103839,solcap_snp_c2_27054,solcap_snp_c2_27048,solcap_snp_c2_27003,PotVar0103851,PotVar0103853,PotVar0103876,solcap_snp_c1_8390,solcap_snp_c2_26979,solcap_snp_c2_26965,solcap_snp_c2_26948,solcap_snp_c2_26945,PotVar0103890,PotVar0103891,PotVar0103895,PotVar0103911,PotVar0103918,PotVar0107780,PotVar0107767,PotVar0107760,PotVar0107708,solcap_snp_c1_12178,solcap_snp_c2_41610,solcap_snp_c1_12179,solcap_snp_c2_54325,solcap_snp_c1_6928,solcap_snp_c1_6930,solcap_snp_c1_6936,solcap_snp_c2_22094,solcap_snp_c2_21992,solcap_snp_c2_21999,PotVar0107676,solcap_snp_c2_22003,PotVar0107672,PotVar0107638,solcap_snp_c2_22024,PotVar0107549,PotVar0107515,PotVar0107475,solcap_snp_c2_22033,solcap_snp_c2_22040,solcap_snp_c2_22041,solcap_snp_c2_22049,solcap_snp_c2_22050,solcap_snp_c2_22069,solcap_snp_c2_22072,solcap_snp_c2_22073,solcap_snp_c2_22076,solcap_snp_c2_46784,solcap_snp_c2_46777,solcap_snp_c2_46776,solcap_snp_c1_13886,solcap_snp_c2_29310,solcap_snp_c2_29317,solcap_snp_c2_29319,solcap_snp_c2_29320,solcap_snp_c2_29323,solcap_snp_c1_8938,solcap_snp_c1_8944,solcap_snp_c2_29344,PotVar0061732,PotVar0061744,PotVar0061749,PotVar0061774,PotVar0061831,PotVar0061840,PotVar0061854,solcap_snp_c2_29981,solcap_snp_c2_29945,solcap_snp_c2_30008,solcap_snp_c2_20755,solcap_snp_c1_6592,PotVar0073152,PotVar0073127,PotVar0073119,PotVar0072996,PotVar0072994,PotVar0072993,PotVar0072988,solcap_snp_c1_6585,PotVar0072968,PotVar0072917,PotVar0072898,PotVar0072897,PotVar0072791,PotVar0072736,solcap_snp_c1_6571,PotVar0072691,PotVar0072686,PotVar0072670,PotVar0072653,PotVar0072621,PotVar0072618,PotVar0072578,solcap_snp_c1_6546,solcap_snp_c2_20622,solcap_snp_c2_20618,solcap_snp_c1_6534,solcap_snp_c1_6533,solcap_snp_c2_20606,solcap_snp_c2_20589,PotVar0072554,PotVar0072548,PotVar0072536,PotVar0072534,PotVar0072482,PotVar0072477,PotVar0072472,solcap_snp_c2_20698,PotVar0072468,solcap_snp_c2_20667,solcap_snp_c2_20640,PotVar0010983,PotVar0010985,PotVar0011035,PotVar0011047,PotVar0011066,PotVar0011079,solcap_snp_c2_40033,solcap_snp_c2_40032,solcap_snp_c1_11853,solcap_snp_c1_11867,PotVar0011101,PotVar0011128,PotVar0011173,PotVar0011182,PotVar0011184,solcap_snp_c2_40085,solcap_snp_c2_40084,PotVar0011189,solcap_snp_c2_40078,solcap_snp_c2_43241,solcap_snp_c2_43242,solcap_snp_c2_43243,solcap_snp_c2_3079,solcap_snp_c2_3078,solcap_snp_c1_914,solcap_snp_c2_3042,solcap_snp_c2_3021,PotVar0105170,PotVar0105194,PotVar0105198,PotVar0105222,PotVar0105228,PotVar0105246,PotVar0105281,solcap_snp_c2_2998,PotVar0105291,PotVar0105349,solcap_snp_c2_2992,solcap_snp_c2_48042,solcap_snp_c1_14205,PotVar0108724,PotVar0108720,PotVar0108713,PotVar0108699,PotVar0108690,PotVar0108681,solcap_snp_c2_48033,solcap_snp_c2_48041,solcap_snp_c1_16490,solcap_snp_c1_16106,solcap_snp_c2_55483,solcap_snp_c2_55482,PotVar0108644,PotVar0108629,PotVar0108625,PotVar0108623,PotVar0108622,PotVar0108619,PotVar0108613,solcap_snp_c2_47932,PotVar0108448,solcap_snp_c2_20879,solcap_snp_c1_6621,solcap_snp_c2_56418,PotVar0096975,solcap_snp_c1_10579,PotVar0097016,PotVar0097020,PotVar0097047,PotVar0097065,PotVar0097101,PotVar0097139,PotVar0097174,PotVar0097245,solcap_snp_c1_8566,solcap_snp_c1_8560,PotVar0122158,solcap_snp_c2_27715,solcap_snp_c1_8549,solcap_snp_c2_27705,solcap_snp_c1_8574,solcap_snp_c2_27765,solcap_snp_c2_27763,solcap_snp_c2_27762,PotVar0065848,PotVar0065847,PotVar0065844,PotVar0065809,PotVar0065767,PotVar0065754,solcap_snp_c2_1290,PotVar0065724,PotVar0065721,PotVar0065695,PotVar0065679,PotVar0065664,solcap_snp_c1_305,solcap_snp_c1_307,solcap_snp_c1_317,solcap_snp_c1_329,solcap_snp_c2_1305,solcap_snp_c2_1447,PotVar0065625,PotVar0065623,PotVar0065612,PotVar0065608,PotVar0065565,PotVar0065489,PotVar0065466,PotVar0065384,PotVar0065380,solcap_snp_c2_1475,PotVar0065371,PotVar0065369,PotVar0065160,solcap_snp_c2_823,solcap_snp_c2_826,solcap_snp_c2_852,solcap_snp_c2_873,solcap_snp_c2_874,solcap_snp_c2_885,solcap_snp_c2_886,PotVar0065120,PotVar0065119,solcap_snp_c2_944,solcap_snp_c2_950,solcap_snp_c2_984,PotVar0116626,PotVar0116629,solcap_snp_c2_989,solcap_snp_c2_1001,PotVar0116672,PotVar0116711,PotVar0116800,PotVar0116809,PotVar0116817,PotVar0116820,solcap_snp_c1_274,solcap_snp_c1_16114,solcap_snp_c2_1077,solcap_snp_c2_1093,solcap_snp_c2_1097,solcap_snp_c2_1098,solcap_snp_c2_1101,solcap_snp_c2_1102,solcap_snp_c2_1103,solcap_snp_c2_1106,solcap_snp_c1_287,solcap_snp_c2_1108,solcap_snp_c1_288,solcap_snp_c1_289,PotVar0104285,PotVar0104266,PotVar0104083,PotVar0104019,PotVar0104004,PotVar0103986,solcap_snp_c2_1220,solcap_snp_c1_304,solcap_snp_c2_1263,PotVar0120148,PotVar0120158,PotVar0120165,PotVar0120166,PotVar0120175,solcap_snp_c1_10351,solcap_snp_c2_34459,solcap_snp_c2_54142,solcap_snp_c2_54139,solcap_snp_c2_54124,solcap_snp_c2_54122,solcap_snp_c2_54116,solcap_snp_c2_44249,PotVar0129167,PotVar0129166,PotVar0129092,PotVar0129047,solcap_snp_c2_44240,solcap_snp_c1_13025,solcap_snp_c2_44264,solcap_snp_c2_44266,PotVar0108444,PotVar0108442,PotVar0108387,PotVar0108304,solcap_snp_c2_24711,PotVar0108273,PotVar0108271,PotVar0108235,PotVar0108221,PotVar0108182,PotVar0108120,PotVar0108099,PotVar0108096,solcap_snp_c2_24739,PotVar0108060,solcap_snp_c2_24745,PotVar0107956,solcap_snp_c1_7793,solcap_snp_c2_24746,PotVar0107947,solcap_snp_c2_24747,solcap_snp_c1_7803,solcap_snp_c2_57296,solcap_snp_c1_16148,PotVar0107905,PotVar0107893,PotVar0107880,solcap_snp_c1_12588,solcap_snp_c2_42733,solcap_snp_c1_12584,solcap_snp_c1_12594,solcap_snp_c2_42739,solcap_snp_c2_42734,PotVar0131645,PotVar0131644,solcap_snp_c1_11801,solcap_snp_c1_11804,solcap_snp_c1_11806,solcap_snp_c2_32790,solcap_snp_c2_32739,solcap_snp_c2_32740,solcap_snp_c1_9799,solcap_snp_c2_32768,PotVar0119518,PotVar0112028,PotVar0112053,solcap_snp_c2_40523,solcap_snp_c2_40522,solcap_snp_c1_17,solcap_snp_c2_56,solcap_snp_c2_55,solcap_snp_c2_54,PotVar0007417,solcap_snp_c2_57273,solcap_snp_c2_57274,solcap_snp_c2_51,PotVar0007258,solcap_snp_c2_47,PotVar0099304,PotVar0099300,solcap_snp_c2_15658,solcap_snp_c1_14047,solcap_snp_c1_14053,solcap_snp_c2_57991,solcap_snp_c1_16651,solcap_snp_c1_16652,solcap_snp_c2_55085,solcap_snp_c2_1906,solcap_snp_c2_1905,solcap_snp_c2_1904,solcap_snp_c2_1903,solcap_snp_c2_1901,solcap_snp_c2_52793,solcap_snp_c2_52794,solcap_snp_c2_52795,PotVar0004366,solcap_snp_c2_1898,PotVar0004372,PotVar0004373,solcap_snp_c2_49643,solcap_snp_c2_9019,PotVar0014585,solcap_snp_c2_9021,solcap_snp_c1_3060,solcap_snp_c2_9028,PotVar0014600,solcap_snp_c1_3057,solcap_snp_c1_3054,solcap_snp_c2_9013,solcap_snp_c1_3052,solcap_snp_c1_3051,solcap_snp_c1_3050,solcap_snp_c1_3049,solcap_snp_c2_9014,solcap_snp_c2_46146,solcap_snp_c1_13683,solcap_snp_c1_13682,solcap_snp_c1_13681,solcap_snp_c2_46144,solcap_snp_c1_7,solcap_snp_c2_45,solcap_snp_c2_39,solcap_snp_c2_37,solcap_snp_c1_5,solcap_snp_c2_34,solcap_snp_c1_1,solcap_snp_c2_63,solcap_snp_c1_6068,solcap_snp_c1_6070,solcap_snp_c2_19220,PotVar0014240,solcap_snp_c2_19222,solcap_snp_c2_19223,solcap_snp_c2_19224,solcap_snp_c2_19226,solcap_snp_c2_19232,solcap_snp_c2_19234,solcap_snp_c2_33008,solcap_snp_c2_33005,solcap_snp_c2_49184,solcap_snp_c1_14531,PotVar0096861,solcap_snp_c2_21309,PotVar0085827,solcap_snp_c1_2673,solcap_snp_c2_38277,solcap_snp_c2_38274,solcap_snp_c2_38273,solcap_snp_c2_38262,solcap_snp_c2_38260,PotVar0051902,PotVar0051881,PotVar0051862,PotVar0051833,solcap_snp_c2_11679,solcap_snp_c2_34551,PotVar0123577,PotVar0123578,solcap_snp_c2_54932,solcap_snp_c2_48929,solcap_snp_c2_48928,solcap_snp_c2_48927,solcap_snp_c2_48926,solcap_snp_c1_14465,solcap_snp_c2_40833,solcap_snp_c1_12031,solcap_snp_c2_40831,solcap_snp_c1_12028,solcap_snp_c1_12027,solcap_snp_c2_40822,solcap_snp_c2_55861,solcap_snp_c2_55860,solcap_snp_c2_41376,solcap_snp_c2_41395,solcap_snp_c2_41393,solcap_snp_c2_41391,solcap_snp_c2_56515,solcap_snp_c2_56514,solcap_snp_c2_40766,solcap_snp_c2_40765,solcap_snp_c2_40763,solcap_snp_c2_40762,PotVar0132240,solcap_snp_c2_40757,solcap_snp_c1_11991,solcap_snp_c1_16001,solcap_snp_c2_45603,solcap_snp_c2_45602,solcap_snp_c1_13524,solcap_snp_c2_57635,solcap_snp_c2_45600,solcap_snp_c1_13531,solcap_snp_c1_13530,solcap_snp_c2_45616,solcap_snp_c2_45612,solcap_snp_c2_45611,solcap_snp_c2_45606,solcap_snp_c2_49532,solcap_snp_c2_25532,solcap_snp_c2_25530,solcap_snp_c2_25529,solcap_snp_c2_25528,solcap_snp_c2_25527,solcap_snp_c2_25526,solcap_snp_c2_25523,solcap_snp_c2_25522,PotVar0111687,solcap_snp_c2_25485,solcap_snp_c1_16351,solcap_snp_c2_25471,solcap_snp_c2_25469,solcap_snp_c1_8021,solcap_snp_c1_8019,solcap_snp_c2_55948,solcap_snp_c1_11535,PotVar0119199,solcap_snp_c1_11540,solcap_snp_c1_11539,solcap_snp_c2_53064,solcap_snp_c1_15594,solcap_snp_c2_27795,solcap_snp_c2_27806,solcap_snp_c2_27808,solcap_snp_c2_27829,solcap_snp_c2_27831,solcap_snp_c2_45692,solcap_snp_c2_45686,solcap_snp_c2_51301,solcap_snp_c2_53950,solcap_snp_c2_53949,PotVar0134570,PotVar0134580,PotVar0134629,PotVar0134650,solcap_snp_c2_53948,PotVar0134670,solcap_snp_c2_53947,solcap_snp_c2_53946,solcap_snp_c2_53945,solcap_snp_c2_53944,solcap_snp_c2_53943,solcap_snp_c1_15698,solcap_snp_c2_51083,solcap_snp_c1_15219,solcap_snp_c1_15225,solcap_snp_c1_15218,solcap_snp_c2_51214,solcap_snp_c2_51215,solcap_snp_c1_14992,solcap_snp_c2_51202,solcap_snp_c1_10295,solcap_snp_c2_34274,solcap_snp_c1_10305,PotVar0004484,solcap_snp_c1_11319,PotVar0004666,PotVar0004674,solcap_snp_c2_37901,solcap_snp_c2_24755,solcap_snp_c2_24768,solcap_snp_c2_24686,solcap_snp_c2_51728,solcap_snp_c2_51744,solcap_snp_c1_15128,solcap_snp_c1_15125,solcap_snp_c2_51735,solcap_snp_c2_51738,solcap_snp_c1_10316,solcap_snp_c1_10336,solcap_snp_c2_34325,solcap_snp_c2_34329,solcap_snp_c2_34332,solcap_snp_c2_34335,solcap_snp_c1_10322,solcap_snp_c1_10324,solcap_snp_c1_10325,solcap_snp_c2_34339,solcap_snp_c2_34342,solcap_snp_c2_34352,solcap_snp_c2_34356,solcap_snp_c2_34389,solcap_snp_c2_34395,solcap_snp_c2_54997,PotVar0004719,PotVar0004726,PotVar0004789,PotVar0004792,PotVar0004795,solcap_snp_c2_15470,solcap_snp_c1_4985,solcap_snp_c2_15483,solcap_snp_c1_4989,solcap_snp_c1_4990,solcap_snp_c1_5001,solcap_snp_c2_15505,solcap_snp_c2_15509,solcap_snp_c2_15512,solcap_snp_c1_5010,solcap_snp_c2_15525,solcap_snp_c2_15528,solcap_snp_c2_15529,solcap_snp_c2_15533,solcap_snp_c2_15534,solcap_snp_c2_15535,solcap_snp_c2_15536,PotVar0004858,PotVar0004860,solcap_snp_c2_15541,solcap_snp_c2_15544,PotVar0004885,PotVar0004936,PotVar0004952,solcap_snp_c2_15550,solcap_snp_c2_15555,solcap_snp_c1_5021,solcap_snp_c1_5029,solcap_snp_c2_15577,solcap_snp_c1_5041,solcap_snp_c2_57076,solcap_snp_c2_57075,solcap_snp_c2_57078,solcap_snp_c1_5042,solcap_snp_c2_15590,solcap_snp_c1_5044,solcap_snp_c2_15592,solcap_snp_c2_15595,solcap_snp_c2_15596,solcap_snp_c1_5047,solcap_snp_c2_15606,solcap_snp_c2_15607,solcap_snp_c2_15622,solcap_snp_c2_15632,solcap_snp_c2_15642,solcap_snp_c2_15654,PotVar0005016,solcap_snp_c2_48124,solcap_snp_c2_48119,PotVar0005102,solcap_snp_c2_48118,PotVar0005134,PotVar0005149,solcap_snp_c2_48112,solcap_snp_c2_48107,solcap_snp_c2_48091,solcap_snp_c2_48087,solcap_snp_c2_48146,solcap_snp_c2_48145,solcap_snp_c2_48144,solcap_snp_c2_48138,solcap_snp_c2_48133,solcap_snp_c1_14236,solcap_snp_c2_48130,solcap_snp_c1_14232,solcap_snp_c1_14231,solcap_snp_c2_48127,solcap_snp_c2_48126,solcap_snp_c2_48117,solcap_snp_c2_48098,solcap_snp_c2_48092,solcap_snp_c2_29799,solcap_snp_c2_29805,solcap_snp_c1_9027,solcap_snp_c1_9031,solcap_snp_c2_29705,solcap_snp_c2_29719,solcap_snp_c2_29720,solcap_snp_c1_9056,solcap_snp_c2_29732,solcap_snp_c1_9058,solcap_snp_c2_29739,solcap_snp_c1_9059,solcap_snp_c1_9060,solcap_snp_c2_29741,solcap_snp_c2_29743,solcap_snp_c2_29744,solcap_snp_c2_29745,solcap_snp_c2_29749,solcap_snp_c2_29752,solcap_snp_c2_29767,solcap_snp_c2_29769,solcap_snp_c2_29780,solcap_snp_c2_29783,solcap_snp_c2_29787,solcap_snp_c2_29788,PotVar0005449,PotVar0005590,solcap_snp_c2_42940,PotVar0005597,solcap_snp_c1_12656,solcap_snp_c1_12655,solcap_snp_c1_12654,solcap_snp_c1_12647,solcap_snp_c2_42920,solcap_snp_c1_12644,solcap_snp_c2_42904,solcap_snp_c2_42951,solcap_snp_c2_44196,solcap_snp_c1_13003,solcap_snp_c2_44194,solcap_snp_c2_44193,solcap_snp_c2_44177,solcap_snp_c1_12991,PotVar0005603,PotVar0005610,solcap_snp_c2_44171,PotVar0005662,PotVar0005668,PotVar0005672,solcap_snp_c2_44168,PotVar0005695,PotVar0005707,solcap_snp_c1_12989,solcap_snp_c1_12987,solcap_snp_c2_44154,solcap_snp_c2_44153,solcap_snp_c2_44152,solcap_snp_c2_44150,solcap_snp_c2_44148,solcap_snp_c2_44145,solcap_snp_c1_12981,solcap_snp_c2_44207,solcap_snp_c2_44205,solcap_snp_c2_44198,solcap_snp_c1_7151,solcap_snp_c2_22558,solcap_snp_c2_22559,solcap_snp_c1_7165,solcap_snp_c2_22563,solcap_snp_c2_22564,solcap_snp_c2_22566,solcap_snp_c2_22576,solcap_snp_c2_22582,solcap_snp_c2_22585,solcap_snp_c2_22586,solcap_snp_c2_22588,solcap_snp_c1_7183,solcap_snp_c2_22591,solcap_snp_c1_7187,PotVar0058273,solcap_snp_c1_7190,PotVar0058237,solcap_snp_c1_7192,PotVar0058234,solcap_snp_c1_7199,solcap_snp_c2_22611,solcap_snp_c1_7201,solcap_snp_c2_22612,solcap_snp_c2_22613,solcap_snp_c2_22624,solcap_snp_c2_22626,solcap_snp_c1_7208,solcap_snp_c2_22630,solcap_snp_c2_22642,solcap_snp_c2_22645,solcap_snp_c1_7212,solcap_snp_c2_22649,solcap_snp_c2_22662,solcap_snp_c2_22664,PotVar0058153,PotVar0058146,PotVar0058145,PotVar0058123,solcap_snp_c2_22699,solcap_snp_c2_22703,solcap_snp_c1_7227,solcap_snp_c1_7230,solcap_snp_c2_22733,solcap_snp_c2_22736,solcap_snp_c2_22741,solcap_snp_c2_22743,PotVar0058108,PotVar0058094,PotVar0057984,PotVar0057955,PotVar0057954,solcap_snp_c2_55265,solcap_snp_c2_58243,solcap_snp_c2_48968,solcap_snp_c1_14476,solcap_snp_c2_48989,solcap_snp_c1_14480,solcap_snp_c2_49008,solcap_snp_c2_49010,solcap_snp_c2_49014,solcap_snp_c2_49017,solcap_snp_c2_49018,solcap_snp_c2_49026,solcap_snp_c1_14468,solcap_snp_c2_48963,solcap_snp_c2_48964,solcap_snp_c2_48978,PotVar0057905,PotVar0057888,solcap_snp_c2_48983,PotVar0057887,PotVar0057871,PotVar0057860,PotVar0057846,PotVar0057840,solcap_snp_c2_54440,PotVar0057806,PotVar0057783,PotVar0057722,PotVar0057721,PotVar0057719,solcap_snp_c2_55747,solcap_snp_c2_55737,solcap_snp_c2_45272,PotVar0057644,PotVar0057635,PotVar0057613,PotVar0057605,solcap_snp_c2_45256,PotVar0057550,solcap_snp_c2_45251,PotVar0057515,PotVar0057514,PotVar0057500,PotVar0057483,solcap_snp_c2_45240,solcap_snp_c2_45239,solcap_snp_c1_13420,solcap_snp_c2_45276,solcap_snp_c1_13417,solcap_snp_c1_8814,solcap_snp_c2_28786,solcap_snp_c1_8809,solcap_snp_c1_8801,solcap_snp_c2_28771,solcap_snp_c2_28770,PotVar0057450,PotVar0057438,PotVar0057431,PotVar0057428,PotVar0057420,PotVar0057411,PotVar0057386,solcap_snp_c2_28768,solcap_snp_c2_28767,solcap_snp_c2_28764,solcap_snp_c2_28761,solcap_snp_c2_28756,solcap_snp_c1_8793,solcap_snp_c2_28749,solcap_snp_c2_28740,solcap_snp_c2_28728,solcap_snp_c2_28727,solcap_snp_c2_28726,solcap_snp_c2_28725,solcap_snp_c2_28697,solcap_snp_c2_28666,solcap_snp_c2_28789,solcap_snp_c2_41768,solcap_snp_c2_41769,solcap_snp_c2_41693,solcap_snp_c1_12224,solcap_snp_c1_12225,solcap_snp_c1_12229,solcap_snp_c2_41725,solcap_snp_c1_12234,solcap_snp_c1_12236,solcap_snp_c2_41744,PotVar0122874,PotVar0122870,PotVar0122868,PotVar0122866,PotVar0122859,PotVar0122857,PotVar0122848,PotVar0122838,PotVar0122828,PotVar0122825,solcap_snp_c1_13268,solcap_snp_c2_45013,PotVar0122789,PotVar0122784,PotVar0122771,PotVar0122769,solcap_snp_c2_45011,PotVar0122768,PotVar0122753,PotVar0122751,solcap_snp_c2_45003,solcap_snp_c1_13243,solcap_snp_c2_45023,PotVar0122709,PotVar0122699,PotVar0122698,PotVar0122690,PotVar0122679,PotVar0122635,Ry_sto_YesuSong_l_LG11,solcap_snp_c2_44766,solcap_snp_c2_44712,PotVar0063963,PotVar0063965,PotVar0064045,PotVar0064140,PotVar0064142,PotVar0064152,PotVar0064155,PotVar0064192,PotVar0064200,solcap_snp_c2_13345,solcap_snp_c2_13350,solcap_snp_c2_13355,solcap_snp_c1_4294,solcap_snp_c2_13392,solcap_snp_c1_4296,solcap_snp_c2_13419,PotVar0064473,PotVar0064474,solcap_snp_c2_13431,solcap_snp_c2_13432,PotVar0064628,PotVar0064699,solcap_snp_c2_13470,solcap_snp_c2_13473,solcap_snp_c1_4319,solcap_snp_c1_4322,solcap_snp_c1_4328,solcap_snp_c1_4336,solcap_snp_c1_4347,solcap_snp_c1_11092,solcap_snp_c2_37164,solcap_snp_c2_37179,solcap_snp_c2_37185,solcap_snp_c2_37189,solcap_snp_c2_37194,solcap_snp_c2_37200,solcap_snp_c2_37201,solcap_snp_c1_11111,PotVar0122617,PotVar0122614,PotVar0122611,PotVar0122608,solcap_snp_c2_33740,PotVar0066199,PotVar0066209,PotVar0066210,PotVar0066219,PotVar0066236,PotVar0066243,solcap_snp_c2_33712,solcap_snp_c2_33677,solcap_snp_c2_33673,solcap_snp_c1_10069,PotVar0066293,PotVar0066295,PotVar0066299,PotVar0066338,solcap_snp_c2_33657,solcap_snp_c2_33653,solcap_snp_c1_10067,solcap_snp_c1_10062,solcap_snp_c2_33636,solcap_snp_c2_33635,solcap_snp_c2_33709,solcap_snp_c2_33683,solcap_snp_c2_33678,solcap_snp_c2_6099,solcap_snp_c1_2187,solcap_snp_c2_6066,solcap_snp_c1_2180,solcap_snp_c1_2162,solcap_snp_c2_6019,solcap_snp_c1_2153,PotVar0066533,PotVar0066668,PotVar0066674,PotVar0066708,PotVar0066709,PotVar0066712,PotVar0066714,solcap_snp_c2_6002,solcap_snp_c2_6001,solcap_snp_c2_6000,solcap_snp_c1_2150,solcap_snp_c2_5991,PotVar0066733,PotVar0066894,PotVar0066948,PotVar0066967,PotVar0067008,PotVar0067013,PotVar0067014,solcap_snp_c1_2148,PotVar0067025,PotVar0067177,PotVar0067187,PotVar0067303,solcap_snp_c2_5978,solcap_snp_c2_5974,solcap_snp_c1_2139,solcap_snp_c2_5966,solcap_snp_c1_2137,solcap_snp_c2_5957,solcap_snp_c1_2131,solcap_snp_c2_6325,solcap_snp_c2_6319,solcap_snp_c1_2310,PotVar0067328,PotVar0067330,solcap_snp_c2_6309,solcap_snp_c1_2302,solcap_snp_c1_2299,solcap_snp_c2_6301,solcap_snp_c2_6293,solcap_snp_c2_6287,PotVar0067381,PotVar0067402,PotVar0067403,PotVar0067404,PotVar0067424,PotVar0067438,PotVar0067471,PotVar0067475,PotVar0067482,PotVar0067483,solcap_snp_c2_6285,solcap_snp_c1_2279,solcap_snp_c1_2278,solcap_snp_c2_6283,solcap_snp_c2_55976,solcap_snp_c2_55969,solcap_snp_c2_55972,solcap_snp_c2_6266,solcap_snp_c1_2263,PotVar0067565,PotVar0067642,PotVar0067643,PotVar0067664,PotVar0067682,PotVar0067732,PotVar0067806,PotVar0067827,PotVar0067854,PotVar0067875,PotVar0067876,solcap_snp_c2_6213,solcap_snp_c1_2228,solcap_snp_c2_6194,solcap_snp_c2_6185,solcap_snp_c2_6173,PotVar0110427,PotVar0110452,PotVar0110462,PotVar0110464,solcap_snp_c2_6167,PotVar0110496,solcap_snp_c1_2213,solcap_snp_c1_2212,solcap_snp_c1_2210,solcap_snp_c2_6126,solcap_snp_c2_6121,solcap_snp_c2_6108,solcap_snp_c1_2314,solcap_snp_c1_2280,solcap_snp_c2_6256,solcap_snp_c2_6170,solcap_snp_c1_2209,PotVar0106272,PotVar0106265,PotVar0106251,PotVar0106247,solcap_snp_c2_47382,solcap_snp_c1_14083,PotVar0106179,PotVar0106170,PotVar0106097,PotVar0106094,PotVar0106087,PotVar0106060,PotVar0106051,PotVar0105987,PotVar0105963,PotVar0105908,PotVar0105904,solcap_snp_c2_37668,solcap_snp_c1_16496,PotVar0105750,PotVar0105735,PotVar0105671,PotVar0105649,PotVar0105633,PotVar0105624,PotVar0105621,PotVar0105481,PotVar0105458,PotVar0105417,solcap_snp_c2_20944,solcap_snp_c2_20945,solcap_snp_c2_20946,solcap_snp_c2_20947,solcap_snp_c2_20948,solcap_snp_c2_20989,solcap_snp_c2_21015,solcap_snp_c2_21020,solcap_snp_c2_21028,solcap_snp_c2_21041,solcap_snp_c2_21050,solcap_snp_c1_6643,solcap_snp_c1_6644,solcap_snp_c2_21053,solcap_snp_c2_57917,solcap_snp_c2_21066,solcap_snp_c2_21070,solcap_snp_c2_21071,solcap_snp_c2_21072,solcap_snp_c2_21073,solcap_snp_c2_23915,solcap_snp_c1_7658,solcap_snp_c2_23921,solcap_snp_c2_23923,solcap_snp_c2_23929,solcap_snp_c2_23942,solcap_snp_c2_23943,solcap_snp_c2_23944,solcap_snp_c2_23945,solcap_snp_c2_23947,solcap_snp_c2_23958,solcap_snp_c2_23965,solcap_snp_c2_23975,solcap_snp_c2_23986,solcap_snp_c2_23988,PotVar0058597,PotVar0058600,PotVar0058618,solcap_snp_c1_7668,solcap_snp_c2_44871,solcap_snp_c1_15787,PotVar0058629,PotVar0058634,solcap_snp_c2_35856,solcap_snp_c2_35868,PotVar0058735,PotVar0058763,PotVar0058776,PotVar0058777,PotVar0058815,solcap_snp_c2_12334,solcap_snp_c2_12333,PotVar0059041,PotVar0059055,PotVar0059068,PotVar0059116,PotVar0059121,PotVar0059208,PotVar0059222,solcap_snp_c2_12276,solcap_snp_c1_3996,solcap_snp_c2_12270,solcap_snp_c2_12268,solcap_snp_c2_12265,PotVar0059280,PotVar0059286,PotVar0059315,PotVar0059349,PotVar0059350,PotVar0059351,PotVar0059385,PotVar0059394,PotVar0059401,solcap_snp_c2_12257,solcap_snp_c2_12256,solcap_snp_c2_11351,solcap_snp_c2_11352,PotVar0059554,PotVar0059566,PotVar0059581,PotVar0059593,PotVar0059598,PotVar0059669,PotVar0059677,PotVar0059692,PotVar0059736,PotVar0059751,PotVar0059779,PotVar0059796,PotVar0059873,solcap_snp_c1_3992,PotVar0059889,PotVar0059933,solcap_snp_c2_12259,PotVar0059939,solcap_snp_c2_24318,solcap_snp_c2_54812,solcap_snp_c2_49302,solcap_snp_c2_49298,solcap_snp_c2_49318,solcap_snp_c2_49317,solcap_snp_c2_49316,solcap_snp_c2_49315,solcap_snp_c2_49313,solcap_snp_c2_49312,solcap_snp_c2_49311,solcap_snp_c2_49310,solcap_snp_c2_49309,solcap_snp_c2_49308,solcap_snp_c2_49306,solcap_snp_c2_49305,solcap_snp_c2_49304,solcap_snp_c2_49303,solcap_snp_c2_53676,PotVar0059988,PotVar0060007,solcap_snp_c2_53677,PotVar0060017,PotVar0060021,PotVar0060022,PotVar0060032,PotVar0060089,PotVar0060119,solcap_snp_c2_53681,PotVar0060133,solcap_snp_c2_53682,PotVar0060138,PotVar0060139,solcap_snp_c2_53683,solcap_snp_c2_53684,PotVar0060143,solcap_snp_c1_15655,solcap_snp_c1_15656,solcap_snp_c1_15657,solcap_snp_c1_15658,PotVar0060167,PotVar0060181,solcap_snp_c1_15659,solcap_snp_c1_15554,solcap_snp_c2_53275,solcap_snp_c2_53280,solcap_snp_c2_33002,solcap_snp_c2_33001,solcap_snp_c2_33000,solcap_snp_c2_32999,solcap_snp_c2_32993,solcap_snp_c2_45474,solcap_snp_c2_32964,solcap_snp_c2_32963,solcap_snp_c2_32954,solcap_snp_c2_56633,solcap_snp_c2_56632,solcap_snp_c2_56631,solcap_snp_c2_56630,solcap_snp_c2_56629,solcap_snp_c2_56628,solcap_snp_c2_56627,solcap_snp_c2_56626,solcap_snp_c2_32339,solcap_snp_c2_32341,solcap_snp_c2_33910,solcap_snp_c2_33919,solcap_snp_c2_33924,solcap_snp_c2_33926,solcap_snp_c2_57106,solcap_snp_c2_33905,solcap_snp_c2_33906,solcap_snp_c2_33917,PotVar0060341,PotVar0060365,PotVar0060366,PotVar0060494,PotVar0060537,PotVar0060552,solcap_snp_c2_29143,solcap_snp_c2_29144,solcap_snp_c2_29151,solcap_snp_c2_29155,solcap_snp_c2_29096,solcap_snp_c1_8863,solcap_snp_c2_29111,solcap_snp_c2_29113,solcap_snp_c2_56561,solcap_snp_c2_37580,solcap_snp_c2_37586,solcap_snp_c1_11237,solcap_snp_c2_54930,solcap_snp_c2_55827,solcap_snp_c1_3694,solcap_snp_c2_11364,solcap_snp_c2_11366,solcap_snp_c2_11369,PotVar0054356,PotVar0054330,solcap_snp_c1_6148,PotVar0054262,PotVar0054089,PotVar0054088,PotVar0054060,PotVar0054058,solcap_snp_c2_55035,solcap_snp_c2_55034,PotVar0130677,PotVar0130698,solcap_snp_c1_16141,solcap_snp_c1_16326,solcap_snp_c1_16325,PotVar0005899,PotVar0005861,PotVar0005841,PotVar0005816,solcap_snp_c1_12160,PotVar0005807,PotVar0005748,solcap_snp_c1_5716,solcap_snp_c2_17332,PotVar0021711,PotVar0021747,PotVar0021790,solcap_snp_c1_16555,solcap_snp_c2_4961,solcap_snp_c2_4958,PotVar0021898,PotVar0021920,PotVar0021937,PotVar0021976,PotVar0021990,PotVar0022012,PotVar0022023,solcap_snp_c2_4996,solcap_snp_c2_4994,solcap_snp_c1_1784,solcap_snp_c2_4989,solcap_snp_c1_1781,solcap_snp_c1_1779,solcap_snp_c1_1778,solcap_snp_c1_1774,solcap_snp_c2_4986,solcap_snp_c2_4979,solcap_snp_c2_4978,solcap_snp_c2_4957,solcap_snp_c2_4956,solcap_snp_c1_5410,solcap_snp_c2_44637,solcap_snp_c2_44635,solcap_snp_c2_44634,solcap_snp_c2_44633,solcap_snp_c1_5937,solcap_snp_c1_5936,solcap_snp_c2_18242,solcap_snp_c1_5942,solcap_snp_c2_18245,solcap_snp_c2_2975,solcap_snp_c1_898,solcap_snp_c2_2968,solcap_snp_c1_16582,solcap_snp_c1_16585,solcap_snp_c1_16586,solcap_snp_c2_57617,solcap_snp_c1_16581,solcap_snp_c2_2957,PotVar0113344,solcap_snp_c1_5965,solcap_snp_c2_18526,solcap_snp_c2_18528,solcap_snp_c2_18530,solcap_snp_c2_18532,solcap_snp_c1_14951,solcap_snp_c2_50980,PotVar0061707,PotVar0061680,PotVar0061673,PotVar0061595,PotVar0061577,PotVar0061523,PotVar0061452,PotVar0061439,solcap_snp_c2_4253,solcap_snp_c1_1453,solcap_snp_c2_4245,solcap_snp_c2_4228,solcap_snp_c2_4227,solcap_snp_c2_4226,solcap_snp_c2_4224,solcap_snp_c2_4222,solcap_snp_c1_1436,solcap_snp_c2_4332,solcap_snp_c2_4327,PotVar0061370,PotVar0061367,PotVar0061317,PotVar0061300,solcap_snp_c1_1470,solcap_snp_c1_1468,solcap_snp_c2_4276,solcap_snp_c2_4275,solcap_snp_c2_4274,solcap_snp_c2_4267,solcap_snp_c2_4262,solcap_snp_c2_4230,solcap_snp_c2_4229,solcap_snp_c2_53725,solcap_snp_c2_53724,solcap_snp_c2_53718,solcap_snp_c2_53730,solcap_snp_c1_10900,solcap_snp_c2_36589,solcap_snp_c2_36587,PotVar0088599,solcap_snp_c2_36586,solcap_snp_c2_36581,solcap_snp_c2_36580,solcap_snp_c2_55138,solcap_snp_c2_29433,solcap_snp_c2_29434,solcap_snp_c2_29435,solcap_snp_c2_30368,solcap_snp_c2_30367,solcap_snp_c2_30365,solcap_snp_c2_30361,solcap_snp_c1_12078,solcap_snp_c2_41086,solcap_snp_c2_41084,solcap_snp_c2_41096,solcap_snp_c2_41090,solcap_snp_c2_50338,solcap_snp_c2_50332,solcap_snp_c2_31477,solcap_snp_c2_44270,solcap_snp_c2_31459,solcap_snp_c2_31444,solcap_snp_c2_31443,solcap_snp_c2_31439,solcap_snp_c2_31435,solcap_snp_c2_31433,solcap_snp_c2_31480,solcap_snp_c2_31430,solcap_snp_c2_31428,solcap_snp_c2_31484,solcap_snp_c2_55957,solcap_snp_c2_55959,solcap_snp_c2_46858,solcap_snp_c1_14181,solcap_snp_c1_4359,solcap_snp_c2_13585,solcap_snp_c2_13590,solcap_snp_c2_13591,solcap_snp_c2_13593,solcap_snp_c2_13594,solcap_snp_c2_13595,solcap_snp_c1_4371,solcap_snp_c1_4376,solcap_snp_c1_4378,solcap_snp_c1_4384,solcap_snp_c1_4385,solcap_snp_c1_4388,solcap_snp_c2_13604,solcap_snp_c2_13606,solcap_snp_c2_13613,solcap_snp_c2_13616,solcap_snp_c2_13620,solcap_snp_c1_4393,solcap_snp_c2_13627,solcap_snp_c2_13632,solcap_snp_c2_13633,solcap_snp_c2_13636,solcap_snp_c2_13638,solcap_snp_c2_13639,solcap_snp_c2_13640,PotVar0111902,PotVar0111906,solcap_snp_c2_56243,solcap_snp_c2_45205,solcap_snp_c2_45203,solcap_snp_c2_45210,solcap_snp_c2_45208,solcap_snp_c1_15081,solcap_snp_c2_51545,solcap_snp_c2_51544,solcap_snp_c2_55950,solcap_snp_c2_52872,PotVar0110594,solcap_snp_c1_14683,solcap_snp_c2_49808,solcap_snp_c2_49812,solcap_snp_c1_4824,solcap_snp_c2_14952,solcap_snp_c1_4822,solcap_snp_c2_14950,solcap_snp_c2_14946,solcap_snp_c2_54586,solcap_snp_c2_54589,PotVar0047209,solcap_snp_c2_3823,solcap_snp_c2_3841,PotVar0047235,PotVar0047242,PotVar0047245,PotVar0047269,PotVar0047270,PotVar0047274,solcap_snp_c2_3873,solcap_snp_c1_1323,solcap_snp_c1_1331,PotVar0047369,PotVar0047371,PotVar0047372,PotVar0047379,PotVar0047393,PotVar0047409,solcap_snp_c2_3679,solcap_snp_c2_3680,solcap_snp_c2_3682,solcap_snp_c2_3683,solcap_snp_c2_3684,solcap_snp_c2_3685,solcap_snp_c2_3686,solcap_snp_c2_3691,solcap_snp_c2_3726,solcap_snp_c1_1264,PotVar0113202,PotVar0113183,PotVar0113080,solcap_snp_c2_3737,solcap_snp_c2_3738,solcap_snp_c2_3739,solcap_snp_c2_3740,solcap_snp_c2_3747,solcap_snp_c1_1271,PotVar0113064,PotVar0113059,PotVar0113046,PotVar0113001,PotVar0112981,PotVar0112968,PotVar0112957,PotVar0112942,PotVar0112922,PotVar0112896,PotVar0112873,PotVar0112872,PotVar0112839,PotVar0112810,PotVar0112803,PotVar0112797,PotVar0112755,PotVar0112739,PotVar0112738,PotVar0112613,PotVar0112531,PotVar0112529,PotVar0112483,PotVar0112466,PotVar0112453,solcap_snp_c2_3805,solcap_snp_c2_22130,PotVar0112415,PotVar0112406,PotVar0112396,PotVar0112395,PotVar0112394,PotVar0112353,PotVar0112309,PotVar0112292,PotVar0112291,PotVar0112243,solcap_snp_c2_22165,solcap_snp_c1_6964,solcap_snp_c2_22183,solcap_snp_c2_22184,solcap_snp_c1_6967,solcap_snp_c2_22186,solcap_snp_c2_22187,solcap_snp_c2_22205,PotVar0112205,PotVar0112145,solcap_snp_c2_22219,PotVar0008115,PotVar0008117,solcap_snp_c1_6972,solcap_snp_c2_15452,solcap_snp_c2_15444,solcap_snp_c2_15427,solcap_snp_c2_15420,solcap_snp_c2_15412,solcap_snp_c2_15393,solcap_snp_c2_15388,solcap_snp_c2_15387,solcap_snp_c2_15385,solcap_snp_c1_4951,solcap_snp_c1_4949,solcap_snp_c1_4947,solcap_snp_c1_4942,PotVar0008184,PotVar0008219,PotVar0008220,PotVar0008243,PotVar0008247,solcap_snp_c2_15365,solcap_snp_c2_15364,solcap_snp_c2_15363,solcap_snp_c2_15359,solcap_snp_c2_15358,solcap_snp_c2_15356,solcap_snp_c2_15353,solcap_snp_c2_15341,solcap_snp_c2_15340,solcap_snp_c2_15338,solcap_snp_c2_15337,solcap_snp_c2_15336,solcap_snp_c2_15334,solcap_snp_c2_15332,solcap_snp_c2_15329,solcap_snp_c1_4926,solcap_snp_c2_15315,solcap_snp_c2_15314,solcap_snp_c2_15303,solcap_snp_c2_15291,solcap_snp_c2_15288,solcap_snp_c2_15287,PotVar0008263,PotVar0008279,PotVar0008293,PotVar0008299,PotVar0008323,PotVar0008325,PotVar0008380,PotVar0008392,PotVar0008393,PotVar0008400,PotVar0008401,PotVar0008409,solcap_snp_c2_15257,solcap_snp_c2_15456,solcap_snp_c2_15268,solcap_snp_c2_30339,solcap_snp_c2_30316,PotVar0008443,PotVar0008447,PotVar0008494,PotVar0008504,solcap_snp_c2_30306,solcap_snp_c2_30305,solcap_snp_c2_30302,solcap_snp_c1_9183,solcap_snp_c2_30298,solcap_snp_c2_30392,solcap_snp_c2_30384,solcap_snp_c1_15802,solcap_snp_c2_54311,solcap_snp_c1_15799,solcap_snp_c2_39917,solcap_snp_c2_39895,solcap_snp_c2_39892,solcap_snp_c1_11815,solcap_snp_c2_39890,solcap_snp_c2_39889,solcap_snp_c2_31568,solcap_snp_c2_31553,PotVar0008553,PotVar0008637,PotVar0008668,PotVar0008711,PotVar0008714,PotVar0008826,PotVar0008851,PotVar0008852,PotVar0008857,PotVar0008860,PotVar0008867,PotVar0008906,PotVar0008928,solcap_snp_c2_31579,PotVar0008949,solcap_snp_c2_43865,solcap_snp_c2_43880,PotVar0130323,PotVar0130487,solcap_snp_c1_12896,solcap_snp_c2_43863,PotVar0130503,PotVar0124359,PotVar0124363,PotVar0124374,PotVar0124386,solcap_snp_c2_51273,solcap_snp_c1_14770,PotVar0117897,PotVar0117909,PotVar0117915,PotVar0117923,PotVar0118016,PotVar0118026,PotVar0118030,PotVar0118035,solcap_snp_c1_10252,solcap_snp_c1_10253,solcap_snp_c1_10256,solcap_snp_c2_34191,solcap_snp_c2_34193,solcap_snp_c2_34197,solcap_snp_c2_34203,solcap_snp_c2_34246,PotVar0118348,solcap_snp_c2_24589,PotVar0097908,PotVar0097922,PotVar0097926,PotVar0097963,PotVar0097995,PotVar0098029,PotVar0098047,solcap_snp_c2_24586,PotVar0098071,PotVar0098072,PotVar0098080,PotVar0098087,solcap_snp_c2_24565,solcap_snp_c2_24563,solcap_snp_c2_24561,solcap_snp_c2_24558,solcap_snp_c2_24556,PotVar0098216,PotVar0098257,PotVar0098277,solcap_snp_c2_24536,solcap_snp_c2_24535,solcap_snp_c2_24534,solcap_snp_c1_7754,PotVar0098351,PotVar0098367,solcap_snp_c2_24454,solcap_snp_c2_24432,solcap_snp_c2_24570,solcap_snp_c2_24446,solcap_snp_c2_24595,solcap_snp_c2_54634,solcap_snp_c2_53631,solcap_snp_c1_8004,solcap_snp_c2_25327,solcap_snp_c2_25331,solcap_snp_c1_8002,solcap_snp_c2_16238,PotVar0053629,PotVar0053640,solcap_snp_c2_16204,PotVar0053642,PotVar0053656,PotVar0053657,PotVar0053659,solcap_snp_c2_16200,PotVar0053672,PotVar0053694,solcap_snp_c2_16182,solcap_snp_c2_16170,solcap_snp_c2_16156,PotVar0053695,PotVar0053721,PotVar0053743,PotVar0053745,PotVar0053748,PotVar0053855,PotVar0053859,PotVar0053907,PotVar0053930,solcap_snp_c1_11730,solcap_snp_c2_55017,solcap_snp_c2_55020,solcap_snp_c2_43770,PotVar0030910,PotVar0030948,PotVar0030961,PotVar0031023,PotVar0031039,PotVar0031068,PotVar0031093,PotVar0031117,PotVar0031118,PotVar0031139,PotVar0031141,PotVar0031147,solcap_snp_c2_43774,PotVar0031150,PotVar0031151,PotVar0031194,PotVar0031197,PotVar0031206,PotVar0031207,PotVar0031212,PotVar0031218,PotVar0031238,PotVar0031310,PotVar0031409,PotVar0031413,PotVar0031486,PotVar0031514,PotVar0031523,solcap_snp_c1_12895,PotVar0031559,PotVar0031560,PotVar0031644,PotVar0031664,solcap_snp_c2_43789,solcap_snp_c2_43794,PotVar0069340,PotVar0069279,PotVar0069232,PotVar0069230,PotVar0069219,PotVar0069206,PotVar0069155,PotVar0069139,PotVar0069123,PotVar0069120,PotVar0069077,PotVar0069076,PotVar0069011,PotVar0069010,PotVar0068972,PotVar0068920,PotVar0068912,PotVar0068892,PotVar0068890,PotVar0068889,PotVar0068822,PotVar0068747,PotVar0068660,PotVar0068642,solcap_snp_c2_27926,PotVar0068577,PotVar0068573,PotVar0068519,PotVar0068478,PotVar0068474,PotVar0068461,PotVar0068447,PotVar0068439,PotVar0068429,PotVar0068428,PotVar0068425,PotVar0068424,PotVar0068412,solcap_snp_c2_27929,PotVar0068409,solcap_snp_c2_27930,solcap_snp_c2_27960,solcap_snp_c2_27961,solcap_snp_c2_27962,solcap_snp_c2_27963,solcap_snp_c1_8631,solcap_snp_c1_8635,solcap_snp_c2_27993,solcap_snp_c2_27994,solcap_snp_c2_28006,solcap_snp_c2_28008,solcap_snp_c1_8646,solcap_snp_c2_31338,solcap_snp_c2_31336,solcap_snp_c2_31334,solcap_snp_c2_31301,solcap_snp_c2_31247,PotVar0068388,PotVar0068383,PotVar0068377,PotVar0068218,PotVar0068195,PotVar0068193,PotVar0068190,PotVar0068186,solcap_snp_c2_51003,solcap_snp_c2_51000,solcap_snp_c2_49199,solcap_snp_c2_49201,solcap_snp_c2_49203,solcap_snp_c2_49206,solcap_snp_c2_49209,solcap_snp_c2_49186,solcap_snp_c1_13762,solcap_snp_c2_46299,solcap_snp_c2_46296,solcap_snp_c2_46290,solcap_snp_c2_46289,solcap_snp_c2_46285,solcap_snp_c1_13767,solcap_snp_c2_56677,solcap_snp_c2_40699,solcap_snp_c2_24674,PotVar0061980,PotVar0061979,solcap_snp_c2_24645,solcap_snp_c2_1542,PotVar0061959,PotVar0061956,solcap_snp_c1_15137,PotVar0061955,PotVar0061934,PotVar0061906,PotVar0061899,PotVar0061897,solcap_snp_c2_34776,solcap_snp_c2_34777,solcap_snp_c2_34789,PotVar0118827,PotVar0118838,PotVar0118853,solcap_snp_c2_34807,solcap_snp_c2_34762,solcap_snp_c2_34780,solcap_snp_c2_34781,PotVar0118860,solcap_snp_c1_10408,solcap_snp_c2_34800,solcap_snp_c2_34803,solcap_snp_c2_34806,solcap_snp_c2_53942,solcap_snp_c2_53932,solcap_snp_c2_53931,solcap_snp_c2_53924,solcap_snp_c1_15695,solcap_snp_c2_53918,solcap_snp_c2_57685,solcap_snp_c2_57680,solcap_snp_c2_48890,solcap_snp_c2_48915,solcap_snp_c2_48901,solcap_snp_c2_48900,solcap_snp_c2_48898,solcap_snp_c1_14454,solcap_snp_c2_48892,PotVar0027678,PotVar0027679,PotVar0027697,PotVar0027702,solcap_snp_c2_53246,PotVar0027707,solcap_snp_c2_53244,solcap_snp_c2_54917,PotVar0027722,PotVar0027729,solcap_snp_c2_3215,solcap_snp_c2_3211,solcap_snp_c2_3193,PotVar0027746,PotVar0027747,solcap_snp_c2_3186,solcap_snp_c2_3185,PotVar0027766,PotVar0027781,PotVar0027783,solcap_snp_c2_3259,solcap_snp_c2_3258,solcap_snp_c2_3255,solcap_snp_c2_3254,solcap_snp_c2_3251,solcap_snp_c2_3247,solcap_snp_c2_32189,solcap_snp_c2_32120,solcap_snp_c2_32130,solcap_snp_c2_32131,solcap_snp_c1_9645,solcap_snp_c2_32437,solcap_snp_c1_9646,solcap_snp_c2_27379,solcap_snp_c2_27397,solcap_snp_c2_27400,solcap_snp_c2_27403,solcap_snp_c2_27414,solcap_snp_c2_27431,PotVar0027811,solcap_snp_c1_16443,solcap_snp_c2_31411,solcap_snp_c2_37389,solcap_snp_c2_37372,PotVar0066128,PotVar0066114,PotVar0066107,solcap_snp_c2_44924,solcap_snp_c2_44932,solcap_snp_c2_44928,solcap_snp_c2_44926,solcap_snp_c2_52691,solcap_snp_c2_52689,solcap_snp_c2_52688,solcap_snp_c2_40751,solcap_snp_c2_40745,solcap_snp_c2_57453,solcap_snp_c1_14577,solcap_snp_c2_16286,solcap_snp_c2_16294,solcap_snp_c2_16298,solcap_snp_c2_16299,solcap_snp_c2_16300,solcap_snp_c2_16302,solcap_snp_c1_403,solcap_snp_c1_404,solcap_snp_c2_14415,solcap_snp_c2_21334,solcap_snp_c2_21336,PotVar0019164,solcap_snp_c2_45743,solcap_snp_c1_14767,solcap_snp_c1_14768,solcap_snp_c1_8913,solcap_snp_c2_29292,solcap_snp_c2_53383,solcap_snp_c2_48391,solcap_snp_c2_56163,solcap_snp_c2_16908,solcap_snp_c1_5459,solcap_snp_c2_16911,solcap_snp_c2_16912,solcap_snp_c2_16920,PotVar0082752,solcap_snp_c2_16921,solcap_snp_c2_16922,solcap_snp_c2_16930,solcap_snp_c2_16934,PotVar0044799,PotVar0044798,PotVar0044793,PotVar0044792,PotVar0044772,solcap_snp_c2_10086,solcap_snp_c2_10060,solcap_snp_c2_10059,solcap_snp_c2_10055,solcap_snp_c2_10054,solcap_snp_c2_10047,solcap_snp_c1_3326,solcap_snp_c1_3321,solcap_snp_c2_58209,solcap_snp_c1_16695,solcap_snp_c1_16696,solcap_snp_c1_8914,solcap_snp_c2_29304,solcap_snp_c2_40524,solcap_snp_c2_49334,solcap_snp_c2_50140,solcap_snp_c2_50137,solcap_snp_c2_50136,solcap_snp_c2_50135,solcap_snp_c2_9491,solcap_snp_c2_9490,solcap_snp_c2_9486,solcap_snp_c2_27921,solcap_snp_c2_27922,solcap_snp_c2_27923,solcap_snp_c1_3172,solcap_snp_c2_27674,solcap_snp_c2_27670,solcap_snp_c2_44369,solcap_snp_c1_13066,solcap_snp_c2_57151,solcap_snp_c2_57161,solcap_snp_c2_45828,solcap_snp_c2_45827,solcap_snp_c2_45825,solcap_snp_c2_4214,solcap_snp_c2_4215,solcap_snp_c2_27782,PotVar0014967,PotVar0014978,solcap_snp_c2_27771,solcap_snp_c2_27772,solcap_snp_c2_27773,solcap_snp_c1_8579,solcap_snp_c1_8581,solcap_snp_c2_57687,solcap_snp_c2_57690,solcap_snp_c2_57692,solcap_snp_c2_57702,solcap_snp_c2_5934,solcap_snp_c2_5939,PotVar0012912,PotVar0012923,PotVar0012951,PotVar0012983,PotVar0012984,PotVar0012999,PotVar0013003,PotVar0013034,PotVar0013110,PotVar0013114,solcap_snp_c2_45819,solcap_snp_c2_45803,solcap_snp_c2_45807,solcap_snp_c2_45808,solcap_snp_c2_45811,solcap_snp_c2_45812,solcap_snp_c2_45816,solcap_snp_c2_45818,solcap_snp_c2_54513,solcap_snp_c2_18996,solcap_snp_c2_18983,solcap_snp_c2_18994,solcap_snp_c2_38375,solcap_snp_c2_38367,PotVar0112105,solcap_snp_c2_19722,solcap_snp_c1_10050,solcap_snp_c2_33619,PotVar0031957,PotVar0031938,PotVar0031936,PotVar0031925,PotVar0031913,solcap_snp_c2_13933,solcap_snp_c2_13946,solcap_snp_c2_13951,solcap_snp_c2_13958,solcap_snp_c1_4502,solcap_snp_c2_42265,solcap_snp_c2_30296,solcap_snp_c2_53701,PotVar0036493,solcap_snp_c2_33630,PotVar0036483,PotVar0036476,PotVar0036461,PotVar0036458,PotVar0036451,PotVar0036430,PotVar0036410,solcap_snp_c1_10054,solcap_snp_c2_33628,solcap_snp_c2_53205,solcap_snp_c2_51049,solcap_snp_c2_51046,solcap_snp_c2_51047,solcap_snp_c2_49683,solcap_snp_c2_48686,solcap_snp_c2_48687,solcap_snp_c2_48010,solcap_snp_c2_48013,solcap_snp_c2_48014,solcap_snp_c1_14197,solcap_snp_c2_49181,solcap_snp_c2_43152,solcap_snp_c1_12702,solcap_snp_c2_43139,solcap_snp_c2_43141,solcap_snp_c2_43145,solcap_snp_c2_17623,PotVar0037718,PotVar0037717,solcap_snp_c2_17620,PotVar0037683,PotVar0037653,PotVar0037640,PotVar0037618,PotVar0037615,solcap_snp_c2_17617,PotVar0037524,solcap_snp_c2_17615,solcap_snp_c2_17613,PotVar0037431,solcap_snp_c2_17612,PotVar0037414,PotVar0037409,solcap_snp_c1_5784,solcap_snp_c2_43909,solcap_snp_c2_43910,solcap_snp_c2_43913,solcap_snp_c2_43916,PotVar0101568,solcap_snp_c2_43895,solcap_snp_c2_43899,solcap_snp_c2_50527,solcap_snp_c1_14870,solcap_snp_c1_14869,solcap_snp_c2_50522,solcap_snp_c2_18788,solcap_snp_c2_18791,solcap_snp_c2_18803,solcap_snp_c1_16588,solcap_snp_c2_18825,solcap_snp_c2_18836,solcap_snp_c2_18838,solcap_snp_c2_18841,solcap_snp_c2_18842,solcap_snp_c2_18848,solcap_snp_c2_18859,solcap_snp_c2_52568,solcap_snp_c2_52567,solcap_snp_c2_42328,solcap_snp_c2_42342,PotVar0109266,PotVar0109256,PotVar0109245,PotVar0109241,PotVar0109173,PotVar0109080,PotVar0109073,PotVar0109060,solcap_snp_c2_53324,solcap_snp_c2_57478,solcap_snp_c2_23337,solcap_snp_c1_7495,solcap_snp_c2_23320,solcap_snp_c2_23308,solcap_snp_c2_23284,PotVar0110843,PotVar0110845,PotVar0110864,solcap_snp_c2_23250,solcap_snp_c2_23235,solcap_snp_c2_23259,solcap_snp_c2_23256,solcap_snp_c2_23252,solcap_snp_c2_23251,solcap_snp_c2_23239,PotVar0107233,PotVar0107214,PotVar0107202,PotVar0107182,PotVar0107177,PotVar0107140,PotVar0107132,PotVar0107128,PotVar0107103,solcap_snp_c2_39374,PotVar0107082,solcap_snp_c1_11644,solcap_snp_c2_39392,solcap_snp_c2_39384,solcap_snp_c2_39383,solcap_snp_c2_50824,solcap_snp_c2_50816,solcap_snp_c2_48482,solcap_snp_c2_48483,solcap_snp_c2_51713,solcap_snp_c2_32512,solcap_snp_c2_32514,solcap_snp_c2_32522,solcap_snp_c2_32528,PotVar0104563,PotVar0104546,solcap_snp_c2_32536,PotVar0104542,solcap_snp_c2_32539,solcap_snp_c2_32466,solcap_snp_c2_32468,solcap_snp_c2_32476,solcap_snp_c2_32481,solcap_snp_c2_32482,solcap_snp_c2_32498,solcap_snp_c2_32505,solcap_snp_c2_32094,solcap_snp_c2_32082,solcap_snp_c2_32080,solcap_snp_c2_32077,solcap_snp_c2_32072,solcap_snp_c2_32068,solcap_snp_c2_32063,solcap_snp_c1_2353,solcap_snp_c2_6387,solcap_snp_c2_6390,solcap_snp_c2_6391,solcap_snp_c2_6392,solcap_snp_c2_6395,solcap_snp_c2_6396,solcap_snp_c2_6399,solcap_snp_c2_6402,solcap_snp_c2_6418,solcap_snp_c1_2348,solcap_snp_c1_2350,solcap_snp_c2_6454,solcap_snp_c1_2351,solcap_snp_c2_6460,solcap_snp_c2_6466,solcap_snp_c2_6478,solcap_snp_c1_2356,solcap_snp_c2_6487,solcap_snp_c2_6490,solcap_snp_c2_6494,PotVar0018646,PotVar0018639,PotVar0018604,solcap_snp_c1_2331,solcap_snp_c1_2333,solcap_snp_c2_6371,PotVar0018588,solcap_snp_c2_7867,solcap_snp_c2_7902,solcap_snp_c2_7915,solcap_snp_c2_7919,solcap_snp_c1_2718,PotVar0018569,PotVar0018564,PotVar0018525,PotVar0018524,PotVar0018476,PotVar0018455,PotVar0018454,PotVar0018450,solcap_snp_c2_7958,solcap_snp_c1_2727,PotVar0018416,PotVar0018406,PotVar0018389,PotVar0018352,PotVar0018338,solcap_snp_c2_8006,solcap_snp_c2_8037,PotVar0018281,PotVar0018236,PotVar0018234,PotVar0018214,PotVar0018212,solcap_snp_c2_7839,PotVar0018085,solcap_snp_c2_50859,PotVar0053483,PotVar0053473,solcap_snp_c1_13698,PotVar0053463,PotVar0053460,PotVar0053453,PotVar0053451,PotVar0053405,PotVar0053378,PotVar0053344,PotVar0053309,PotVar0053291,solcap_snp_c2_46213,PotVar0053268,PotVar0053235,PotVar0053191,PotVar0053168,PotVar0053145,PotVar0053092,PotVar0053090,PotVar0053073,PotVar0053072,PotVar0052908,PotVar0052873,PotVar0052870,PotVar0052807,PotVar0052804,PotVar0052795,PotVar0052776,PotVar0052767,PotVar0052766,PotVar0052756,solcap_snp_c1_1954,solcap_snp_c2_5356,solcap_snp_c1_1948,PotVar0052707,PotVar0052698,PotVar0052662,PotVar0052633,PotVar0052600,solcap_snp_c1_1944,solcap_snp_c2_5333,PotVar0052570,PotVar0052560,PotVar0052532,PotVar0052528,PotVar0052507,PotVar0052484,PotVar0052483,solcap_snp_c2_5331,PotVar0052480,PotVar0052458,PotVar0052450,PotVar0052447,PotVar0052416,PotVar0052399,solcap_snp_c1_1938,solcap_snp_c1_1923,solcap_snp_c2_5307,solcap_snp_c2_5730,solcap_snp_c2_5713,PotVar0052353,PotVar0052297,PotVar0052284,PotVar0052280,PotVar0052085,solcap_snp_c2_5712,solcap_snp_c2_5710,solcap_snp_c2_5684,solcap_snp_c1_2019,solcap_snp_c1_2014,solcap_snp_c1_2004,solcap_snp_c2_5652,solcap_snp_c2_5594,solcap_snp_c1_1985,solcap_snp_c2_5507,solcap_snp_c2_5474,solcap_snp_c2_5461,solcap_snp_c2_5443,solcap_snp_c2_5440,solcap_snp_c1_16129,solcap_snp_c1_16131
93-1015,0,0,0,4,4,2,4,4,4,3,2,2,4,0,3,1,3,3,0,2,1,1,3,3,1,4,0,2,4,3,1,1,3,1,1,4,2,1,3,1,1,3,2,1,1,1,2,1,4,2,1,3,3,1,4,1,0,0,1,1,4,2,4,0,2,1,1,2,3,1,2,2,2,1,3,3,0,1,1,1,3,1,3,4,1,1,1,3,3,4,0,3,1,3,3,3,1,0,4,3,4,1,3,3,3,1,0,1,1,4,4,4,1,2,4,2,1,2,1,1,2,2,4,3,3,0,4,2,2,2,0,4,2,2,2,0,2,2,1,2,4,2,1,2,3,0,2,3,2,2,2,2,2,2,2,1,1,1,3,2,3,4,1,3,2,2,2,2,2,1,0,0,3,2,3,2,3,3,1,2,0,4,0,3,0,3,1,1,1,3,2,1,2,2,3,1,1,3,3,2,1,3,1,1,1,0,3,3,2,1,1,1,2,3,1,1,3,3,1,2,2,1,3,2,4,1,0,0,0,2,4,2,3,3,3,3,4,3,4,3,3,1,0,4,1,1,3,1,2,1,1,1,3,2,2,2,1,2,2,2,4,0,2,4,2,2,3,3,3,1,3,3,2,0,3,3,1,2,2,1,3,1,2,3,3,3,4,1,3,2,0,1,3,3,1,1,3,3,1,1,1,1,1,0,1,2,3,3,3,3,3,1,3,2,1,2,1,1,1,1,3,4,1,1,2,1,3,0,4,3,1,1,3,3,3,1,3,1,3,3,1,3,3,3,2,3,1,3,3,1,4,3,1,2,3,1,2,2,1,1,2,1,3,2,0,3,2,4,2,3,2,1,0,2,3,4,1,1,1,3,3,0,1,4,3,4,3,2,2,0,1,3,3,1,2,1,0,4,1,2,2,3,0,1,2,2,1,1,3,3,1,1,2,0,1,1,3,3,3,2,1,4,0,1,4,1,4,0,2,2,2,4,4,3,1,2,3,3,2,4,3,1,1,1,2,2,1,3,1,1,0,2,1,3,2,2,1,1,3,2,3,3,3,2,3,1,1,2,2,1,2,3,3,3,4,1,1,1,1,2,3,1,2,1,2,3,0,0,1,0,1,1,2,3,1,3,2,0,4,1,0,1,0,1,2,3,2,1,2,1,4,1,1,3,3,4,0,4,3,1,3,3,4,1,1,1,3,1,0,3,0,0,1,3,4,1,1,4,4,4,4,3,1,1,2,1,2,3,3,1,4,1,2,1,3,1,3,2,4,4,3,2,4,2,0,1,1,2,2,1,1,1,3,0,4,0,0,3,1,1,3,0,1,1,4,2,2,2,2,2,2,0,2,2,1,1,2,0,4,1,0,0,4,4,2,3,3,1,1,4,4,4,0,0,0,2,1,2,2,1,2,0,1,2,3,2,4,2,2,1,4,4,3,4,1,3,1,3,0,1,0,0,3,3,2,1,1,1,3,1,1,2,3,3,3,1,1,0,4,2,1,1,3,2,3,4,4,3,1,1,3,3,3,1,3,0,1,3,0,2,1,2,2,4,0,2,2,2,4,4,2,2,2,2,2,2,2,2,1,3,3,1,1,1,2,3,4,4,0,4,0,4,4,0,1,2,1,1,2,3,0,3,4,3,4,3,4,1,3,3,1,3,2,2,2,1,1,2,2,2,2,2,4,2,2,4,2,4,0,2,4,3,4,4,4,1,2,4,0,3,0,0,2,2,4,2,2,2,2,2,0,4,4,2,2,2,3,1,4,2,0,2,4,4,4,2,1,2,1,3,0,0,4,1,3,1,2,0,1,3,1,4,0,4,0,2,4,2,4,0,4,2,3,2,2,3,0,2,4,0,2,2,1,2,2,2,2,2,2,2,0,2,0,4,0,0,4,0,4,4,4,4,0,3,0,4,1,4,0,1,0,2,2,3,2,2,3,1,0,2,3,4,0,0,1,4,1,2,2,3,1,2,3,2,2,3,3,3,1,3,1,1,2,4,1,3,0,1,2,3,3,3,0,1,1,3,3,3,1,1,2,1,2,4,4,2,3,4,3,2,1,0,3,2,1,3,1,2,3,3,1,2,2,4,0,3,3,3,3,3,1,2,3,3,3,3,2,2,1,3,2,1,2,2,1,3,3,4,3,2,1,3,3,3,1,1,1,1,3,2,2,3,3,2,2,1,1,2,1,2,3,2,3,2,0,2,3,3,3,1,3,2,3,2,1,1,2,2,3,2,1,1,2,1,2,1,3,2,1,4,3,4,0,2,2,1,1,1,3,1,3,0,0,2,2,3,3,0,3,3,1,3,3,1,3,2,3,3,2,2,2,1,1,1,1,0,0,3,3,3,4,4,1,1,3,3,1,2,1,3,1,2,3,3,3,2,2,4,0,2,2,3,2,1,1,2,2,2,0,2,1,2,3,0,4,3,2,2,3,3,4,1,0,3,3,4,4,4,2,4,2,0,2,3,2,2,2,2,3,0,1,4,2,0,3,2,0,1,4,3,1,0,2,2,2,2,2,4,2,1,4,4,1,2,1,2,2,2,3,2,1,0,3,3,3,1,3,2,2,3,3,0,2,1,0,0,2,4,4,2,2,3,3,3,1,4,1,0,3,0,4,2,3,1,2,2,1,2,4,3,2,2,2,4,2,0,2,1,0,2,2,1,3,1,1,3,3,4,2,3,3,1,1,4,4,0,1,2,0,2,0,2,1,2,4,2,1,1,1,0,4,1,2,4,1,2,1,1,4,4,1,1,4,1,3,3,3,3,2,2,3,1,3,3,2,1,1,2,1,3,1,2,0,2,0,0,3,2,3,3,0,4,1,1,3,2,3,2,1,4,2,1,2,1,1,1,0,0,1,0,1,3,0,2,3,0,4,3,0,3,1,1,3,0,1,3,0,1,0,4,2,4,0,4,2,2,2,1,4,1,2,1,2,0,2,4,2,4,3,2,2,1,2,1,4,4,0,3,0,1,0,4,4,0,0,3,1,3,3,0,4,0,1,4,4,1,2,3,0,4,1,3,3,0,0,3,4,4,0,4,1,4,0,0,4,4,3,0,0,4,0,3,0,4,3,0,3,3,0,4,4,2,2,4,4,4,2,0,2,3,2,2,2,4,4,2,0,2,0,4,2,4,0,4,4,2,1,4,4,2,2,4,0,1,4,1,2,0,3,4,1,4,4,3,2,1,3,2,2,1,1,1,1,1,1,1,2,1,1,1,1,3,3,4,3,4,0,3,3,2,3,1,4,4,4,2,4,2,2,2,2,1,1,3,0,2,3,0,4,3,1,4,3,0,3,1,2,2,0,1,0,2,2,2,2,2,2,4,2,0,2,4,1,2,2,2,1,2,4,4,3,4,2,2,0,4,2,1,4,0,3,4,2,1,0,0,0,2,2,2,2,2,2,1,1,3,1,1,0,2,2,3,3,3,4,1,3,2,4,1,2,2,2,1,2,1,3,1,2,1,2,4,0,0,0,0,4,1,1,1,3,3,0,3,1,3,4,3,1,4,0,3,0,0,3,0,1,1,3,0,4,3,1,3,1,3,0,3,3,3,1,2,1,1,4,2,1,4,2,1,1,1,0,4,0,1,0,2,4,4,1,3,4,3,1,4,4,0,4,4,3,4,3,0,1,0,3,0,4,4,0,1,4,0,4,4,4,0,0,0,4,0,4,0,0,0,4,0,0,0,4,4,0,3,3,2,4,3,2,3,2,1,1,1,1,4,2,3,2,1,3,3,3,0,1,2,2,1,3,3,1,2,1,0,1,4,1,3,2,3,2,4,3,3,1,1,1,1,3,0,2,4,1,3,2,2,0,2,1,0,0,0,0,4,1,4,3,1,3,3,3,4,2,3,2,4,2,3,3,3,0,2,4,4,2,1,4,1,1,1,4,4,4,2,0,4,4,1,3,1,1,0,0,3,3,3,3,1,0,3,1,4,3,1,4,3,1,4,3,4,0,0,1,1,0,0,0,4,2,3,4,2,2,1,4,3,0,1,1,3,2,1,1,1,4,1,2,1,2,1,1,0,3,3,3,3,4,2,2,3,3,3,3,2,4,1,1,2,3,1,3,4,4,3,1,3,3,4,2,3,2,3,3,3,3,1,2,3,0,0,2,0,4,1,3,1,2,0,1,1,1,3,2,0,2,4,1,2,2,3,2,4,3,0,2,3,0,0,1,0,0,4,2,2,4,3,3,2,2,4,1,1,2,2,1,1,3,2,3,3,2,1,3,3,4,3,1,3,0,1,3,3,4,0,3,0,0,0,0,3,4,0,1,1,1,3,4,3,3,1,3,3,0,4,1,1,3,1,3,3,1,3,1,1,3,1,4,1,1,3,1,1,4,1,4,3,4,1,1,1,4,3,1,3,1,1,3,1,3,1,0,1,0,3,3,3,4,3,2,1,2,1,3,1,1,1,2,2,3,3,0,2,2,2,2,2,1,0,3,2,1,1,0,2,3,2,2,3,1,2,0,3,1,1,2,2,1,0,1,0,3,1,0,1,0,3,3,4,3,3,3,1,3,4,4,3,4,1,3,4,3,1,3,4,1,4,0,3,3,2,0,2,0,0,2,2,4,0,2,0,4,4,2,2,0,4,1,1,4,3,2,0,3,0,1,2,1,1,3,4,2,1,2,0,0,3,3,3,1,1,1,4,0,0,3,1,3,1,1,1,3,1,3,1,3,1,0,3,1,3,3,1,4,1,3,1,3,1,1,3,3,3,0,3,3,0,0,0,3,1,3,3,3,1,1,0,1,1,1,3,3,4,4,3,3,4,3,3,3,1,4,1,1,1,4,4,4,1,3,4,3,1,0,0,0,3,1,0,3,3,2,4,1,1,1,1,3,4,3,1,2,3,1,2,1,3,1,1,3,2,4,4,1,1,2,1,1,1,3,2,4,2,4,2,2,2,2,0,4,2,2,2,2,0,2,2,4,4,0,2,2,4,2,2,2,4,2,0,2,0,2,2,0,2,2,0,2,2,2,2,3,1,1,1,2,1,1,1,3,4,0,4,3,1,1,0,4,1,3,4,4,4,3,3,3,3,3,1,1,1,1,3,0,1,3,1,1,0,1,3,3,1,1,4,0,4,1,0,0,3,4,0,3,4,1,1,4,1,1,0,1,4,0,4,4,4,1,1,1,1,0,4,0,1,0,4,4,1,3,0,0,3,2,1,3,2,1,2,2,0,4,1,0,2,0,2,2,2,1,1,0,4,4,2,1,1,1,1,1,1,3,3,3,3,0,3,1,3,2,2,4,3,2,2,2,1,3,2,2,2,2,2,2,0,2,4,2,2,3,3,3,1,4,3,3,3,1,3,3,1,4,4,1,1,3,3,4,3,0,0,0,3,3,3,3,0,3,3,3,0,1,1,3,3,1,3,3,1,3,3,1,3,3,1,0,3,0,1,4,1,3,3,4,4,4,4,1,1,3,1,3,2,3,0,2,0,1,4,1,1,1,1,4,3,3,0,4,3,0,4,3,4,1,0,4,1,1,3,3,3,1,0,4,1,0,3,1,3,3,0,4,1,3,1,0,3,3,3,3,3,4,4,0,1,2,3,0,4,2,4,1,3,0,3,3,2,2,2,3,2,2,0,4,2,4,2,4,0,0,2,4,2,2,2,0,2,2,4,2,2,4,0,4,4,3,4,2,0,0,4,2,0,1,4,1,3,3,1,0,3,3,1,3,3,3,1,1,1,0,4,4,0,3,2,0,2,2,2,0,4,0,4,0,2,1,3,1,1,1,3,1,0,3,1,3,3,3,3,0,2,4,3,1,3,3,3,1,3,1,3,3,1,1,4,4,3,3,3,1,3,3,1,1,2,3,3,1,3,1,4,3,4,3,2,0,3,3,1,3,3,1,3,1,3,4,1,3,3,3,1,3,3,1,1,3,1,3,0,1,3,3,1,3,3,4,3,3,1,2,0,1,3,1,1,3,1,3,3,1,3,1,3,1,3,1,3,3,3,3,1,1,1,3,1,1,1,0,3,1,3,3,1,3,1,1,4,0,0,4,1,1,4,3,2,1,3,1,1,1,3,3,1,3,2,2,2,2,3,4,3,0,4,3,2,1,2,2,2,3,4,1,0,3,0,3,2,4,0,4,3,1,1,1,4,0,3,0,0,4,3,0,4,3,0,3,4,3,1,0,1,2,3,4,1,3,1,3,2,3,2,3,4,0,2,2,3,1,4,2,0,0,0,2,4,0,4,4,4,4,0,3,4,4,2,2,2,2,0,1,0,4,2,3,4,4,1,2,3,4,3,3,3,2,0,0,4,2,1,1,2,2,3,3,4,2,4,1,3,0,3,3,0,1,3,2,3,1,2,3,3,4,2,2,1,3,3,3,1,3,2,1,3,3,1,3,2,2,1,1,3,3,0,0,4,0,3,1,4,0,4,4,4,0,4,0,0,4,0,4,0,0,3,2,3,2,4,2,4,0,0,4,3,2,4,4,1,1,1,2,2,0,1,2,4,3,0,0,3,4,3,0,3,4,3,0,3,1,3,3,3,1,2,0,1,4,3,2,1,0,1,3,2,2,1,3,3,2,0,4,2,4,1,1,1,1,1,4,4,2,1,1,2,4,3,4,3,1,3,3,4,1,2,1,0,2,0,0,3,0,4,3,0,4,2,3,3,3,2,2,3,0,3,4,3,3,3,1,2,0,0,1,1,2,0,2,1,0,4,1,2,2,2,4,4,3,2,4,3,1,2,3,1,2,4,2,1,0,1,4,3,0,4,0,3,0,4,4,0,0,2,2,4,3,4,4,0,4,4,0,0,4,2,0,2,4,0,4,4,4,0,2,0,2,0,2,4,4,2,4,2,0,2,4,4,2,4,0,0,1,1,2,4,1,2,1,3,2,1,2,1,2,2,0,3,0,2,1,2,3,4,2,1,1,1,4,1,1,0,1,0,1,1,3,1,2,2,3,4,4,0,0,1,0,0,1,3,4,3,1,0,1,0,4,4,3,3,2,3,4,2,1,3,1,3,1,2,1,2,1,2,1,2,4,4,1,4,3,4,1,2,0,0,1,0,4,3,4,1,3,0,0,1,3,0,3,0,1,4,0,0,1,0,3,4,3,1,1,0,4,0,3,2,1,2,0,2,2,2,3,0,0,4,4,2,2,2,4,2,2,2,2,4,2,2,2,2,1,3,2,1,4,2,2,0,0,1,2,2,4,3,4,3,3,4,4,2,3,3,0,1,0,0,2,4,0,1,1,0,1,2,2,2,2,2,2,2,4,1,3,3,2,2,2,3,1,4,3,4,0,4,3,0,0,2,1,4,2,4,0,1,1,2,3,1,3,3,2,2,1,3,3,0,4,1,2,2,1,1,1,2,3,1,1,3,1,2,1,1,2,4,1,1,2,1,3,2,2,3,1,1,1,3,1,2,2,2,2,2,2,2,2,1,4,2,0,1,4,2,2,0,2,2,0,4,0,0,0,4,4,4,4,4,4,1,0,4,0,4,0,0,0,4,0,3,0,4,4,0,4,4,0,4,0,0,0,0,0,4,4,4,4,4,0,0,0,4,4,0,4,0,4,0,4,0,0,0,4,4,4,0,0,0,0,4,4,0,0,0,3,0,4,0,4,0,4,4,3,0,1,4,3,4,3,1,1,0,0,3,0,0,0,4,4,4,0,3,3,4,1,0,1,3,4,3,2,3,3,3,3,4,2,1,3,3,3,3,1,3,3,0,1,1,2,1,2,3,1,1,3,2,3,3,1,3,3,2,1,2,1,1,2,2,1,1,1,2,1,1,3,1,1,3,2,3,1,3,1,3,2,2,2,3,4,0,4,4,4,4,3,3,1,0,4,3,2,2,0,0,4,1,2,2,1,1,1,4,0,0,3,0,3,3,3,3,3,0,4,4,2,4,3,1,4,0,4,0,0,4,3,1,4,0,0,3,4,0,3,1,0,0,2,3,3,3,3,3,1,4,0,1,3,1,4,3,1,1,0,1,0,3,4,1,0,0,0,0,0,0,3,1,2,4,3,0,1,4,3,0,0,0,4,0,4,4,3,0,0,1,3,4,4,0,4,0,1,3,3,0,4,0,4,0,0,2,0,0,2,1,4,2,3,0,4,3,4,4,2,2,2,0,2,2,0,0,4,0,4,0,4,2,0,0,1,4,0,0,4,0,2,0,0,4,3,2,4,2,0,3,2,0,4,2,1,1,1,0,3,2,3,3,3,0,1,1,0,0,3,1,1,3,2,1,1,1,4,3,1,2,4,2,1,2,2,2,3,1,3,3,4,3,3,1,2,2,4,0,1,0,0,4,0,1,4,3,0,4,4,3,0,1,1,1,3,1,0,1,4,1,0,4,0,3,3,4,0,0,0,0,4,4,1,4,1,1,3,2,2,2,2,4,3,3,1,2,3,1,2,1,2,3,0,4,3,0,1,4,3,4,4,4,3,1,0,1,0,4,4,3,1,0,3,3,4,3,1,4,0,3,0,1,3,4,3,3,2,1,3,3,1,1,1,3,3,1,2,1,2,3,1,0,1,4,1,3,1,1,2,1,1,3,1,0,3,0,3,1,1,1,3,2,1,1,3,1,3,1,1,3,0,1,0,1,1,1,0,4,3,4,4,1,1,2,2,3,1,4,2,4,1,1,2,0,3,3,1,1,1,0,1,4,4,2,2,4,3,3,0,3,0,4,2,0,4,2,2,2,2,2,4,4,2,2,0,0,0,3,1,0,1,3,2,1,4,1,1,3,3,2,1,1,2,1,3,1,2,3,1,1,2,0,4,0,3,4,1,1,4,0,0,1,1,1,1,3,0,4,4,0,0,0,1,1,0,1,1,1,0,3,3,3,2,1,3,2,2,3,2,1,3,2,2,2,3,1,2,3,1,1,3,2,1,3,1,1,2,1,3,3,3,1,2,4,3,2,2,0,1,2,3,4,0,4,0,1,3,2,2,0,0,3,4,1,0,3,1,1,1,3,2,1,4,1,3,4,2,3,2,1,3,1,3,2,3,1,1,3,3,2,3,3,1,1,1,3,3,1,1,3,4,0,3,1,1,3,0,2,3,1,1,4,0,1,2,0,0,1,2,0,2,4,2,0,1,1,3,0,4,3,0,1,1,4,3,0,4,1,0,3,0,2,0,4,4,3,1,3,2,0,3,1,4,4,4,4,2,0,0,3,0,4,4,0,3,0,1,4,1,3,1,2,4,1,1,3,4,2,3,4,4,1,4,3,1,2,3,0,4,2,2,2,3,3,1,3,3,4,3,1,2,3,4,1,1,3,4,0,1,4,2,2,0,2,4,2,0,0,0,4,0,4,4,0,0,1,4,4,3,1,0,0,4,2,2,1,3,1,3,4,4,4,2,2,2,4,2,2,4,0,4,0,4,4,4,0,4,0,0,0,4,0,4,4,4,4,4,0,0,0,3,1,3,1,1,3,3,1,2,2,3,4,1,1,3,1,0,2,1,2,2,4,0,2,2,1,0,2,3,2,0,0,2,0,4,4,1,3,2,1,2,4,4,3,2,0,3,1,2,0,3,3,1,1,1,1,4,1,2,1,1,1,1,1,0,2,2,1,1,3,1,3,2,1,1,3,2,1,1,3,3,3,1,3,1,1,2,4,3,4,4,2,3,2,1,3,1,3,1,1,4,3,3,4,1,1,4,0,4,1,1,2,1,1,2,3,1,0,1,2,1,0,2,1,0,1,2,2,0,1,2,4,2,1,1,1,3,1,3,0,0,0,0,3,0,4,1,3,0,1,1,3,3,3,4,3,2,3,1,4,2,0,1,4,0,0,0,2,4,2,2,4,0,4,3,2,0,2,0,0,2,2,1,4,0,2,3,2,2,3,0,2,1,4,0,0,1,0,4,3,4,2,2,2,0,2,3,4,1,2,3,3,3,3,0,2,3,2,3,3,1,1,3,1,3,1,3,4,1,0,1,2,3,1,3,0,1,1,1,3,3,2,3,0,2,1,4,2,3,2,1,1,1,4,3,3,0,1,2,3,2,0,1,1,1,2,3,2,3,3,3,3,3,1,3,2,1,4,2,1,1,3,1,3,2,2,1,1,2,2,1,3,3,0,1,4,1,4,4,2,3,4,3,3,4,2,4,0,0,3,0,2,2,0,3,4,4,2,2,3,2,1,4,0,4,4,3,2,1,2,4,0,2,1,4,3,2,4,0,2,0,1,1,3,1,0,0,1,4,1,0,1,0,3,2,1,3,3,2,2,4,3,4,3,4,0,0,1,3,0,0,1,4,1,0,3,1,0,3,1,0,1,3,3,4,1,0,4,4,3,4,4,3,3,4,3,1,2,0,1,1,1,4,0,1,0,4,2,1,4,3,3,3,0,0,3,1,2,3,2,2,2,4,0,0,1,3,2,2,1,3,3,2,4,2,3,4,3,0,1,1,1,1,1,3,3,0,1,1,2,1,3,2,2,2,4,4,4,2,2,4,1,3,3,3,2,1,0,0,3,2,4,3,3,4,0,3,2,3,1,1,1,1,3,3,1,2,2,3,1,3,1,2,2,2,2,3,3,1,0,0,2,0,4,3,2,0,3,3,0,4,0,0,0,4,0,4,4,4,3,4,4,4,3,2,1,1,1,1,4,1,0,4,2,3,0,3,4,0,0,1,0,3,0,2,4,1,4,1,3,0,1,1,1,0,3,0,4,4,0,1,0,4,3,1,0,4,1,3,1,1,2,4,2,4,1,0,2,2,0,3,1,0,4,3,1,0,0,2,2,0,4,2,3,0,2,2,4,4,4,4,4,2,4,0,2,0,0,4,4,4,3,4,2,0,4,2,2,2,0,0,2,4,4,0,4,4,0,3,4,2,0,0,2,4,4,2,3,1,2,2,2,2,2,0,4,0,4,2,1,3,2,0,0,1,4,1,0,2,4,0,3,0,0,2,3,2,0,1,3,4,4,4,3,0,3,3,1,4,4,2,2,3,0,1,1,4,4,4,4,4,0,0,4,4,2,0,0,0,1,4,4,3,2,0,4,3,1,2,4,0,1,3,1,0,4,1,0,2,1,0,3,4,2,1,2,1,1,3,1,2,4,4,1,0,2,4,4,1,2,0,1,3,2,1,4,2,4,4,0,4,1,2,4,4,4,1,2,3,3,0,4,4,1,0,4,0,0,0,2,4,3,1,1,1,1,2,4,4,4,4,4,3,0,3,0,1,0,0,3,1,1,1,0,2,3,2,2,3,4,3,0,1,4,3,3,1,1,3,4,4,1,4,1,0,1,0,4,4,3,1,2,1,3,3,2,1,1,1,0,3,4,2,1,0,0,0,4,0,4,2,4,3,4,3,3,1,3,4,1,0,2,3,1,4,3,3,3,3,0,1,1,3,2,2,0,4,4,4,2,4,0,0,4,2,1,3,0,1,1,3,3,3,2,4,1,4,1,4,1,2,0,1,2,3,1,1,1,2,3,3,2,3,2,2,0,1,1,3,0,0,2,4,0,1,0,0,2,3,0,1,1,4,3,3,0,4,0,1,3,2,3,3,1,1,1,3,1,1,1,3,4,3,4,0,4,1,1,2,3,3,4,4,4,4,2,3,2,0,2,2,1,0,1,4,3,1,3,1,0,1,3,1,1,3,3,0,0,1,1,3,3,2,3,1,3,2,4,2,0,3,3,2,2,0,3,2,3,0,1,2,1,1,2,1,1,3,3,2,2,1,4,3,1,2,3,3,2,1,3,1,2,3,3,1,1,3,1,2,3,1,2,3,1,0,3,2,1,0,0,3,3,1,3,1,2,1,2,1,3,2,3,3,3,3,1,2,2,1,4,1,2,2,3,3,1,3,1,3,1,2,2,3,0,2,1,3,1,3,3,2,3,2,3,3,1,3,3,0,1,1,0,0,1,3,2,3,1,0,1,3,1,4,3,1,1,0,3,3,1,3,3,1,3,1,0,1,1,4,1,1,3,1,1,1,1,1,2,2,3,2,1,3,3,2,0,1,3,3,2,4,2,2,0,4,2,2,2,0,2,2,0,2,2,2,0,0,2,0,4,2,4,4,2,0,2,2,2,4,2,2,2,2,2,2,0,2,2,2,2,4,0,1,0,0,0,1,0,0,0,0,0,0,4,4,0,0,0,0,4,0,0,4,0,4,4,4,4,0,4,0,0,4,4,0,0,4,0,4,4,0,1,1,1,4,3,0,3,0,1,0,0,1,1,3,2,2,4,4,1,0,4,1,3,2,3,3,1,0,3,3,0,4,4,0,3,1,4,4,3,1,3,3,1,1,3,2,3,1,3,1,3,0,0,2,4,0,3,4,2,1,3,2,3,1,3,4,3,3,0,1,4,0,3,2,1,0,1,1,3,4,0,4,0,4,4,1,1,4,3,1,1,0,3,4,0,4,1,2,2,0,3,3,2,0,1,4,0,1,1,0,4,3,4,4,3,3,4,1,1,0,3,4,4,2,3,3,2,2,3,3,3,1,1,3,2,1,2,3,0,1,4,1,3,3,3,2,3,2,3,2,3,2,3,1,3,4,2,3,2,3,3,1,1,0,1,3,1,2,2,4,2,3,3,3,3,4,3,1,0,1,1,0,3,4,4,1,2,4,1,0,3,2,2,2,3,0,2,3,1,3,0,1,1,4,4,2,3,3,3,1,4,2,4,3,4,0,3,4,3,3,1,1,1,3,4,3,0,1,4,2,0,1,3,0,0,4,1,0,3,1,0,0,0,2,0,1,1,4,2,0,4,3,4,0,4,2,0,0,0,0,1,3,0,1,3,0,4,0,4,0,4,4,0,4,0,4,4,0,3,4,2,4,2,2,2,2,0,0,0,2,2,4,4,0,4,1,0,0,0,0,0,0,2,0,4,2,0,2,4,4,0,0,0,0,0,0,2,2,1,4,2,4,2,1,0,0,0,1,4,2,4,2,1,4,3,3,3,3,1,1,4,1,1,1,4,1,1,1,2,3,1,1,4,3,0,2,3,2,1,2,2,3,3,1,3,1,0,1,2,1,2,2,1,3,3,1,0,3,4,4,4,1,1,0,3,0,4,3,0,0,3,3,3,1,1,0,3,1,0,2,3,4,2,3,3,0,3,1,3,2,3,1,2,2,3,0,2,3,1,3,3,1,1,3,1,0,1,3,3,1,3,1,4,3,1,1,0,3,1,1,0,4,3,0,0,3,4,0,1,0,0,1,3,3,4,1,1,3,0,1,1,3,1,3,3,1,1,1,1,0,3,4,3,3,2,1,4,3,0,1,4,4,0,0,0,3,4,4,1,0,3,3,4,3,2,1,0,1,4,4,4,4,3,3,3,3,2,3,0,4,0,3,0,2,1,1,2,4,4,1,4,0,1,4,1,2,0,3,0,2,0,2,1,4,3,3,2,4,1,3,1,4,1,1,3,1,0,1,4,3,4,3,1,0,4,0,4,3,4,1,2,3,0,1,2,2,4,2,0,3,4,2,1,4,4,4,3,0,4,1,3,4,0,0,4,4,3,0,3,4,4,4,1,4,4,2,4,0,0,3,0,1,2,4,3,1,1,2,0,3,4,2,3,3,3,2,2,0,2,1,1,2,0,3,4,3,3,3,3,3,4,1,1,1,4,4,1,4,4,3,0,4,1,4,4,4,2,4,1,1,2,3,2,4,0,2,1,1,0,0,2,2,2,2,1,2,2,1,2,3,0,0,2,2,1,2,3,0,3,1,3,3,3,3,3,4,1,3,2,4,3,0,1,1,1,3,0,0,2,0,3,0,4,1,3,0,3,3,0,4,0,4,2,0,2,3,0,0,3,3,3,1,3,0,4,1,1,3,4,2,4,1,4,3,1,3,0,1,3,4,3,1,2,1,1,1,1,2,2,3,0,1,2,1,2,3,3,2,1,3,2,0,1,3,3,3,1,2,0,0,4,2,0,4,2,0,2,2,1,0,0,1,2,1,0,1,2,2,3,3,2,4,4,2,2,2,2,2,2,2,0,4,2,0,2,3,4,1,2,1,1,0,1,2,3,3,3,3,2,2,0,1,1,3,2,2,3,1,2,2,2,0,2,3,3,3,3,1,0,4,1,4,2,3,4,1,0,1,1,3,3,2,3,1,3,1,4,1,2,1,2,3,1,3,1,3,0,1,0,3,4,1,2,3,3,3,2,2,4,1,1,0,3,0,1,3,4,1,3,1,4,4,3,4,0,4,1,4,2,4,3,1,1,1,3,4,1,2,0,1,3,1,1,3,4,4,1,4,3,0,4,4,1,4,3,2,4,0,1,3,3,3,2,1,2,2,2,4,1,0,2,1,3,4,4,0,4,1,1,4,3,0,4,4,2,4,1,4,2,1,1,4,1,1,1,3,4,2,0,4,2,3,1,4,1,3,3,2,1,2,0,2,2,1,3,1,0,2,2,4,1,4,4,3,4,1,2,1,2,2,3,3,2,4,4,3,1,3,3,1,2,1,3,2,4,3,3,3,1,4,2,1,4,3,3,4,3,1,1,2,3,3,4,1,0,3,3,4,2,2,2,1,2,3,0,1,3,1,2,3,1,1,3,1,2,1,3,1,2,1,0,4,3,2,2,1,3,4,1,4,2,2,1,0,2,2,1,1,3,1,4,0,4,4,1,3,1,1,3,1,2,3,1,0,2,4,0,4,4,3,4,4,2,2,2,0,0,4,0,0,0,4,4,0,4,0,0,0,0,0,0,0,4,0,3,1,0,1,3,4,2,1,1,3,4,4,3,1,3,2,3,0,0,3,3,2,3,3,3,3,2,2,4,2,2,2,2,3,3,3,4,3,0,1,3,3,3,1,3,0,2,3,1,1,1,2,1,3,3,2,1,0,3,4,3,2,1,2,3,3,0,1,2,2,2,1,2,0,1,4,1,1,0,2,2,3,3,2,1,4,2,2,4,1,4,0,2,0,3,1,3,0,1,0,1,1,0,3,2,3,3,1,4,1,3,4,1,0,1,0,4,0,2,3,1,0,1,0,0,0,2,0,0,1,3,1,2,4,4,0,2,1,1,2,2,4,1,4,0,4,1,3,3,3,1,3,1,3,2,1,1,2,3,1,0,3,3,1,1,2,3,2,3,1,3,1,3,2,3,2,3,1,2,2,1,3,2,1,3,3,2,2,3,3,1,1,4,3,0,3,1,4,1,4,1,3,0,2,4,3,2,0,4,2,0,2,2,4,2,0,4,2,4,0,2,2,1,2,4,1,1,0,2,0,0,1,2,1,2,4,3,3,1,3,3,4,1,3,1,3,3,3,0,4,2,4,1,3,2,1,3,1,3,1,1,1,3,2,2,1,4,4,1,3,1,4,3,1,1,1,4,2,2,4,1,1,3,2,3,3,0,0,1,2,3,3,1,3,2,2,0,0,2,1,0,0,3,4,0,0,2,0,2,0,2,0,2,1,0,2,2,4,2,2,3,2,2,2,1,2,2,0,2,2,2,0,4,3,1,3,1,4,2,3,2,1,1,1,4,4,3,1,3,3,0,3,0,4,1,1,4,3,0,3,3,0,1,0,1,0,4,1,3,4,2,4,3,3,3,4,4,3,0,0,4,0,1,4,2,2,2,1,2,1,1,4,0,3,1,3,1,3,2,3,3,1,3,1,1,2,3,1,1,2,1,1,1,3,1,0,3,1,2,1,3,2,3,3,1,0,1,2,2,3,3,3,3,3,1,1,0,0,1,2,2,2,4,2,2,2,4,2,4,2,0,4,2,2,2,2,2,2,4,2,2,2,4,1,3,1,3,3,3,3,1,1,3,0,3,1,3,3,4,0,1,4,1,1,0,1,4,3,2,3,4,1,1,0,0,0,2,3,1,3,0,1,1,4,2,2,2,2,1,3,3,4,1,0,1,4,2,2,2,2,2,2,4,0,0,4,4,0,0,0,4,0,4,4,0,3,4,1,3,1,3,4,3,0,1,4,0,4,4,3,3,0,3,1,1,3,3,3,3,1,4,1,1,3,1,1,2,1,3,4,3,3,1,0,3,3,3,1,1,3,1,3,3,1,3,1,1,3,3,0,1,1,1,0,3,1,1,1,3,3,0,1,1,1,1,1,1,3,3,3,3,3,4,3,1,1,3,1,3,1,1,3,1,3,3,1,3,3,1,3,1,3,3,3,3,1,3,3,1,1,1,1,3,0,1,3,1,1,3,1,3,1,1,3,1,0,3,3,1,3,3,4,3,2,2,0,2,2,2,2,4,3,1,1,1,1,1,1,1,2,3,0,2,4,3,4,1,4,1,2,3,3,3,0,1,3,1,3,1,1,0,2,0,3,3,1,1,1,3,1,1,0,1,2,1,0,3,3,3,0,4,3,2,3,1,1,1,3,1,3,1,1,1,2,2,2,2,2,2,2,2,2,2,1,3,0,2,0,4,2,3,0,4,1,3,0,0,0,4,0,2,2,2,0,0,0,2,2,2,0,4,2,4,0,2,0,4,2,4,0,4,2,1,0,4,3,2,3,1,3,4,3,0,4,0,1,0,0,0,3,1,2,0,1,2,0,3,3,1,3,1,1,3,1,2,4,1,1,4,2,2,2,1,1,1,4,1,0,3,3,1,1,2,3,1,1,4,4,2,1,1,3,4,1,2,2,3,1,1,2,1,2,3,0,0,0,0,4,3,1,1,4,1,3,3,4,3,3,4,3,1,2,2,4,2,3,2,1,1,0,4,3,0,1,2,1,4,0,0,2,3,0,2,2,3,3,2,1,1,1,2,4,3,2,3,3,2,1,2,1,2,2,2,4,1,2,3,2,3,3,2,3,1,1,1,3,1,3,3,4,3,2,3,3,0,4,1,2,4,2,0,0,2,4,2,0,4,2,2,0,0,3,1,1,2,4,0,0,2,1,2,2,3,2,3,3,3,2,1,2,1,3,2,2,1,1,1,2,1,4,2,1,4,3,1,4,4,2,0,2,2,4,4,0,2,0,2,0,2,4,4,2,4,4,2,0,4,2,4,2,3,2,4,2,2,4,2,2,4,0,4,1,1,3,1,1,3,3,1,2,1,1,2,3,3,1,0,1,1,0,1,4,4,0,0,2,3,3,4,0,0,0,2,4,3,1,0,4,0,3,0,0,0,1,0,1,3,2,0,2,2,2,2,1,1,1,1,2,2,2,4,2,2,0,2,4,2,4,0,0,0,1,3,0,4,0,0,2,4,0,1,0,0,4,4,0,3,4,0,4,4,3,0,0,3,4,1,3,0,0,4,4,4,3,4,2,0,2,3,0,2,2,4,4,2,1,0,3,3,3,3,3,1,0,3,4,0,1,0,3,4,0,0,4,3,4,0,0,3,1,3,1,3,1,3,1,4,1,3,3,0,1,2,0,1,3,1,1,3,1,0,0,3,1,2,2,3,3,4,2,4,1,1,0,1,1,0,4,1,3,2,2,2,4,0,0,3,1,4,3,3,2,1,4,3,0,0,1,3,4,3,2,1,1,0,0,3,4,1,1,3,0,0,2,2,4,3,0,3,0,4,1,1,2,4,2,3,2,3,4,3,2,3,1,0,3,2,2,2,3,2,2,1,0,3,1,3,3,1,1,1,3,3,3,0,1,1,3,3,4,0,4,4,1,2,3,0,2,0,0,0,2,3,0,4,2,0,3,2,2,4,2,3,1,1,2,3,2,2,3,2,1,3,4,4,1,3,3,0,4,4,3,1,2,2,3,3,2,4,0,4,1,1,1,2,1,3,3,0,2,3,1,4,4,1,4,4,4,0,1,3,3,1,1,4,1,2,3,4,1,3,4,0,0,3,0,4,4,2,2,3,1,2,4,3,3,1,2,4,1,2,4,0,0,0,4,3,4,0,0,4,4,2,0,0,3,4,2,4,4,1,2,1,1,2,2,1,3,3,2,1,1,0,4,4,3,4,4,4,2,2,1,1,4,1,3,1,0,1,2,1,3,2,3,3,2,2,2,0,0,0,3,2,2,0,3,3,2,0,2,2,3,1,3,3,3,3,1,2,0,4,1,1,4,1,1,3,0,2,0,1,3,3,3,3,3,1,1,3,1,4,2,1,1,2,2,4,1,2,2,0,3,1,2,1,3,2,2,3,2,3,1,1,3,3,1,0,4,1,0,1,2,4,3,3,3,3,1,0,3,3,3,2,2,0,2,2,4,2,2,1,3,3,1,3,2,1,3,1,3,1,3,1,4,0,2,4,0,2,1,3,4,2,3,3,1,2,0,3,3,3,4,1,2,2,1,3,2,3,3,2,3,3,1,3,2,2,1,0,4,4,1,3,3,4,1,3,1,1,2,4,2,4,2,2,3,2,4,2,2,2,2,2,2,2,0,4,0,2,4,4,0,0,0,0,4,0,2,2,4,2,0,2,2,2,1,3,3,2,3,0,2,4,3,1,4,2,0,2,2,1,3,1,2,3,3,0,3,4,0,1,0,3,2,0,4,2,0,2,3,0,1,1,1,1,0,0,2,2,2,4,2,1,4,0,3,1,4,4,1,1,1,3,1,1,2,2,2,2,2,2,4,0,2,2,2,3,2,2,2,2,2,3,1,2,2,3,2,2,3,1,2,1,2,2,4,2,0,2,2,3,0,2,4,2,2,2,2,2,2,4,0,4,0,4,2,0,4,4,0,2,2,0,2,2,0,4,4,4,0,2,2,3,2,4,4,1,2,1,2,0,1,0,1,1,2,0,1,0,3,2,1,0,1,3,1,3,1,0,1,2,2,2,1,2,1,1,1,2,1,3,1,2,3,1,3,3,1,3,0,0,4,2,3,1,2,0,0,3,0,2,1,4,0,4,4,0,0,3,3,3,2,3,1,4,4,4,3,3,3,4,2,2,4,1,1,1,4,1,2,1,3,4,3,3,1,1,2,1,1,1,1,4,3,4,2,2,1,3,3,2,3,2,3,0,0,2,2,4,1,1,3,1,1,3,3,1,3,0,4,3,0,4,3,3,4,1,3,4,1,4,2,2,0,2,4,0,2,4,2,2,2,2,4,2,0,4,2,0,4,2,4,0,2,0,2,0,2,2,0,0,4,2,0,4,0,2,2,0,2,2,0,0,4,0,4,0,1,3,4,3,1,4,1,4,1,4,0,0,2,2,0,2,2,2,0,0,2,2,0,4,2,2,4,2,2,2,2,2,2,0,0,4,0,0,4,2,0,4,4,0,0,0,1,0,4,3,3,3,1,3,3,3,1,2,1,2,2,2,2,3,2,2,2,2,2,1,1,3,2,3,3,1,3,2,2,2,2,2,2,2,2,2,2,2,1,1,3,1,1,1,1,1,3,1,3,3,3,1,1,3,1,1,3,3,3,1,2,2,2,2,2,2,2,2,1,1,2,0,1,2,3,2,3,1,2,3,2,1,0,4,3,3,3,1,0,1,1,4,2,2,2,2,4,2,0,2,3,3,0,0,3,2,0,2,3,2,2,2,2,2,2,2,2,2,2,1,3,3,3,4,0,4,1,3,3,3,1,1,1,3,4,3,3,3,1,1,3,1,1,3,1,3,1,3,1,3,1,3,4,0,0,4,4,2,2,0,0,4,1,1,4,3,1,3,0,0,4,3,0,4,1,1,1,4,1,1,0,0,3,3,2,2,1,2,2,2,2,2,4,4,0,2,4,0,2,4,2,0,3,0,3,1,3,0,0,4,1,2,4,1,3,2,2,1,4,2,2,3,3,2,1,4,0,1,1,0,1,3,1,4,4,0,4,1,4,1,0,3,4,3,4,4,3,4,4,4,0,4,4,3,1,3,1,4,3,3,3,3,3,1,2,3,3,3,1,1,4,1,1,1,3,3,1,2,2,2,1,0,2,2,3,1,3,3,1,1,1,1,1,0,3,3,0,4,1,3,4,4,3,0,3,1,3,1,3,1,4,4,1,3,3,1,3,1,3,2,3,1,1,2,1,1,3,1,3,3,3,3,2,1,1,1,1,2,1,1,3,2,3,3,3,1,1,0,1,3,3,3,2,1,3,2,1,3,3,3,0,1,1,2,1,4,0,0,4,1,3,0,2,1,1,2,4,0,0,0,4,3,3,0,4,0,4,0,4,0,0,4,0,4,4,0,0,2,2,2,0,0,2,2,4,4,1,2,4,2,4,2,0,4,4,0,0,3,4,4,0,0,0,3,0,3,4,1,1,3,0,2,0,1,1,0,2,1,3,4,0,4,4,1,1,1,2,3,3,2,3,4,0,3,0,3,4,3,1,0,4,1,1,0,4,1,1,3,0,1,1,4,3,3,0,1,4,4,0,4,0,1,1,4,3,2,4,0,4,1,3,0,1,3,1,0,1,2,3,3,2,1,1,1,0,4,1,0,1,3,1,3,1,1,4,1,4,1,1,3,1,0,0,1,3,2,0,4,3,3,4,2,1,1,3,2,4,0,3,4,0,4,1,2,4,2,4,2,1,4,0,3,0,1,4,3,0,4,3,3,4,4,1,1,1,1,1,1,1,0,2,1,4,0,4,3,2,2,1,1,4,1,3,2,4,3,3,2,3,2,3,0,4,3,2,2,2,4,1,4,4,4,2,0,4,0,1,0,4,3,1,0,4,3,4,1,3,0,3,1,0,1,4,4,2,2,4,4,3,4,2,2,0,0,4,3,3,1,4,2,2,2,3,4,1,0,0,0,0,3,4,1,0,2,0,3,4,1,2,2,2,1,2,3,0,2,0,2,4,4,2,4,2,0,0,3,4,2,1,3,4,0,0,0,3,1,2,2,3,1,2,2,1,2,2,3,0,2,2,4,2,0,2,1,3,2,2,4,4,2,4,2,2,2,0,2,0,0,2,4,0,2,2,2,0,0,4,4,2,0,0,0,1,2,2,3,1,1,1,1,3,3,0,2,2,3,2,2,2,2,2,2,2,2,2,0,2,2,3,3,1,3,3,2,2,1,3,4,1,1,3,3,1,1,0,0,1,2,0,1,3,3,4,1,0,1,4,3,2,1,2,2,4,2,3,4,2,2,3,4,1,0,3,1,1,1,1,0,2,4,2,1,1,4,3,2,2,4,1,4,0,3,2,1,3,1,2,0,3,1,0,4,0,4,4,3,1,1,0,4,4,0,4,3,0,2,2,0,3,0,1,3,0,1,4,3,1,3,4,0,0,0,4,0,0,3,3,2,2,3,4,4,1,0,4,1,4,0,4,2,4,4,4,4,0,2,2,2,4,0,1,0,0,0,2,0,2,2,2,0,3,1,1,4,4,4,1,1,4,4,2,0,3,3,4,2,1,2,2,2,1,1,0,3,0,3,4,1,3,2,1,2,3,2,1,2,4,2,1,1,2,0,2,3,0,0,2,1,1,1,2,2,1,4,1,0,1,1,2,3,1,2,1,3,2,2,2,1,4,2,4,3,2,2,2,2,0,1,2,2,2,3,2,3,1,1,1,2,2,2,1,3,2,1,2,2,3,2,2,3,4,0,2,0,4,0,1,3,3,2,3,3,3,2,2,3,1,3,2,0,0,1,2,2,3,2,3,0,2,2,2,2,4,3,2,1,2,3,2,0,3,2,1,2,1,0,0,2,2,2,0,3,2,4,2,1,3,1,2,1,2,2,2,0,2,2,2,2,3,1,3,1,2,2,2,0,2,2,3,3,1,2,3,2,2,3,1,0,0,4,2,0,2,2,2,2,2,2,2,2,4,2,2,4,2,2,4,4,1,1,0,4,0,0,3,4,0,0,1,0,4,4,4,4,4,0,1,4,4,4,4,4,4,0,4,0,3,1,3,1,1,0,0,0,1,1,4,3,0,3,1,0,1,3,2,0,4,0,0,3,4,4,0,0,0,4,4,4,1,1,4,1,0,0,4,4,4,0,4,4,0,3,4,2,0,3,0,1,4,0,4,0,0,2,0,4,1,0,3,1,2,4,4,4,1,3,0,0,1,4,3,1,4,4,2,1,3,3,0,0,3,1,4,3,0,1,4,2,3,0,3,2,2,0,3,2,4,1,2,1,1,2,2,2,2,2,1,0,4,2,4,1,3,0,2,4,1,3,1,2,4,3,3,2,2,4,2,4,0,4,1,1,4,1,3,3,3,1,3,1,3,3,3,1,2,4,1,1,4,1,0,3,1,2,4,3,3,0,2,1,0,2,2,1,2,3,3,1,2,3,0,0,2,3,3,3,2,0,4,1,1,3,3,2,4,3,3,1,3,3,1,3,2,0,3,1,4,2,2,3,4,1,3,1,1,1,3,0,0,3,2,3,1,0,1,3,3,3,0,3,0,4,1,0,2,1,1,4,3,0,1,1,1,4,1,1,1,1,1,0,2,3,4,3,1,4,0,4,1,1,1,2,2,4,4,3,2,3,4,0,2,3,4,3,0,3,1,1,3,0,0,2,2,2,1,2,3,1,1,1,3,4,0,4,3,0,3,0,2,1,4,3,0,0,0,4,2,3,3,4,1,1,4,3,4,2,3,1,1,2,3,4,3,4,1,4,3,3,1,2,0,2,1,2,3,3,2,3,4,1,3,1,1,4,0,3,1,1,1,3,1,3,3,1,3,1,3,1,3,1,3,3,1,3,4,4,4,0,3,3,2,0,3,4,0,3,3,4,3,0,1,1,3,3,2,3,1,0,3,1,1,1,0,3,3,4,0,1,0,0,3,3,3,4,2,2,1,3,0,1,3,3,1,2,4,3,3,1,1,2,1,2,0,1,3,2,0,1,3,1,2,2,2,3,3,4,1,3,1,1,1,1,4,0,3,3,3,2,3,4,2,3,2,2,3,2,1,1,4,2,0,3,3,4,3,3,3,3,3,0,2,0,4,0,3,1,4,4,4,4,0,0,0,4,2,0,4,3,0,3,1,4,1,1,0,0,0,0,1,0,4,4,4,4,4,0,4,4,4,3,4,0,0,4,4,2,4,3,2,2,0,0,2,0,0,0,0,4,0,4,3,0,0,0,3,4,2,4,4,0,4,4,2,0,3,0,0,0,0,4,0,0,0,4,0,0,4,3,0,3,0,4,0,4,0,4,0,2,0,0,4,4,4,2,0,2,1,0,1,4,0,4,0,4,3,1,2,4,2,2,2,3,3,2,3,3,2,3,3,2,1,2,0,1,4,4,3,2,4,4,3,2,0,2,4,2,2,0,0,4,2,2,4,0,4,4,0,2,4,2,3,4,3,2,3,4,1,3,0,2,1,1,3,2,2,2,2,1,0,2,0,0,1,3,3,4,1,3,2,1,1,1,1,3,2,2,3,2,3,3,3,3,1,3,1,4,1,3,3,3,4,0,2,4,0,0,0,1,2,0,1,4,3,4,2,3,1,3,0,2,3,1,3,1,3,0,3,1,1,1,4,4,1,0,0,0,1,2,2,2,2,2,2,4,2,0,4,3,3,1,3,0,1,1,3,2,3,2,2,2,1,1,2,0,1,1,1,3,3,2,1,1,1,0,3,0,3,1,0,2,1,3,4,0,3,1,4,2,3,0,2,0,0,1,4,1,3,2,3,3,1,0,1,2,3,4,4,4,0,3,1,0,0,1,3,2,3,3,4,3,0,2,0,3,0,2,1,1,4,4,0,0,1,3,3,2,3,1,1,1,3,2,0,1,4,3,3,3,3,0,3,1,4,1,4,3,1,3,4,1,3,1,1,1,1,3,0,0,1,1,2,1,3,3,1,1,3,3,3,1,3,4,4,2,0,2,3,4,2,0,1,3,1,4,1,1,4,2,1,0,0,4,1,4,1,2,4,2,4,0,2,1,2,1,3
B100,1,1,1,4,4,1,4,4,3,2,2,2,3,1,1,2,2,1,0,3,3,0,2,1,1,4,0,4,2,3,1,1,3,4,3,1,4,1,4,1,1,3,1,1,1,1,2,0,4,3,2,0,0,4,3,4,0,1,0,4,4,0,3,1,3,1,0,1,0,4,4,4,4,0,0,0,1,4,0,0,3,0,3,3,2,2,2,2,3,3,1,2,2,3,2,3,2,1,3,3,3,1,3,2,2,2,1,2,2,3,3,3,1,2,4,1,2,2,1,1,2,1,3,3,4,0,3,3,3,3,0,2,3,1,3,0,2,1,3,1,4,1,1,2,2,0,2,3,1,1,3,1,2,2,3,1,1,1,1,2,3,3,0,4,1,3,3,1,3,2,2,1,4,3,2,3,3,4,0,1,2,3,0,4,1,3,1,2,2,1,3,1,1,3,4,1,0,3,2,3,0,4,1,0,1,1,4,3,3,1,1,0,1,3,0,0,4,2,0,1,3,2,3,2,3,1,1,0,0,0,4,2,2,4,2,4,2,4,4,4,4,4,1,2,0,0,3,1,4,1,1,1,3,1,3,1,1,2,1,3,4,0,2,4,2,1,3,3,3,1,3,3,3,0,3,4,1,2,2,1,3,1,1,4,3,3,4,1,3,1,0,2,3,3,1,1,3,0,4,1,1,1,1,1,1,1,3,3,3,3,3,1,3,4,2,2,1,1,1,1,3,4,1,1,2,1,3,1,4,2,2,1,2,2,3,1,3,1,3,3,1,2,3,3,3,3,1,3,4,1,4,3,1,3,3,1,2,2,0,2,2,2,4,4,0,4,2,4,1,3,3,1,2,2,3,4,1,1,2,3,2,1,2,3,3,3,2,1,1,1,1,4,2,1,2,1,0,4,0,3,1,4,0,1,1,1,0,0,3,3,1,1,2,1,1,1,3,3,4,1,1,3,1,1,3,1,3,1,2,1,1,2,3,4,1,3,4,4,1,2,4,1,1,1,3,3,0,4,1,0,2,1,1,4,1,3,0,1,3,1,4,4,3,2,2,1,1,4,0,1,2,3,2,3,3,1,1,1,1,3,1,1,1,1,0,1,0,0,1,0,1,2,0,3,2,3,1,0,2,1,0,1,1,1,4,2,2,2,4,2,4,3,3,1,1,4,0,4,1,3,1,1,4,1,3,3,1,3,0,1,0,0,3,1,4,3,4,3,3,4,4,2,2,0,2,0,3,3,4,1,2,0,3,2,0,0,4,4,4,3,4,0,2,0,0,3,3,1,3,3,3,1,2,0,4,1,0,2,2,1,3,0,2,1,4,2,2,2,2,2,2,0,2,2,3,1,2,1,3,1,1,0,4,4,2,3,2,1,1,3,3,3,1,1,2,3,3,3,1,3,3,0,0,3,1,1,3,2,3,0,4,3,1,4,2,3,0,1,1,1,1,1,3,4,2,2,1,1,3,0,1,2,2,3,1,2,2,2,2,2,0,4,4,0,4,2,2,4,2,2,2,4,2,2,4,0,2,2,2,2,0,4,2,2,0,3,2,3,3,3,2,3,2,2,1,2,3,1,1,3,3,1,1,1,0,4,2,2,2,2,1,2,3,2,2,2,1,0,1,3,1,3,2,2,3,1,3,2,1,2,3,1,2,1,3,1,1,2,3,3,1,1,3,1,3,3,1,3,1,1,3,3,3,2,3,1,3,3,1,3,1,1,3,2,4,2,2,1,2,2,0,4,4,2,2,1,3,1,3,2,1,1,3,3,3,3,1,2,3,3,2,1,3,3,1,0,3,0,1,3,2,3,2,2,2,1,3,1,2,1,3,3,4,1,3,3,1,2,3,1,3,1,2,3,1,2,1,1,3,1,1,1,1,3,1,1,4,0,4,3,3,3,1,3,1,3,1,4,0,2,1,3,3,4,1,0,3,1,1,1,4,3,1,1,1,3,0,0,1,4,0,4,4,4,0,4,3,4,0,3,0,1,1,2,1,1,2,1,3,4,3,4,2,1,0,4,4,2,0,0,1,2,3,3,2,1,4,1,4,0,1,2,4,1,0,3,2,0,3,4,0,3,3,3,1,3,2,3,4,4,0,1,3,3,3,2,1,3,1,3,1,0,2,2,1,4,3,4,3,1,1,3,3,2,1,2,2,3,2,0,4,2,3,4,4,2,2,0,1,4,3,4,3,1,1,3,3,2,3,1,3,1,3,3,2,1,1,1,3,1,2,2,1,1,2,1,3,3,2,3,3,4,0,3,1,0,0,1,4,1,2,0,0,1,1,2,2,0,2,3,1,2,2,2,3,1,2,2,3,1,3,2,0,0,0,0,1,4,4,4,2,4,0,0,3,2,1,2,0,4,1,4,4,2,3,4,4,4,2,4,4,3,0,1,1,4,4,0,0,2,0,0,3,2,2,4,1,1,4,1,1,0,0,4,1,4,3,4,3,3,3,1,1,1,3,3,1,3,4,1,1,4,3,1,3,1,1,0,3,4,2,1,1,1,2,2,1,3,2,1,4,4,1,2,1,2,2,3,4,2,2,0,2,3,3,1,4,0,2,3,3,0,2,1,0,1,3,4,3,1,0,3,3,3,1,4,0,1,3,0,4,0,3,1,2,4,1,3,4,3,2,4,1,3,2,0,2,1,0,2,2,0,1,1,1,4,4,4,2,2,3,0,0,4,4,0,0,1,0,2,1,2,2,2,4,3,0,0,0,1,4,2,2,4,2,2,2,2,4,4,0,1,4,1,3,3,2,2,1,0,4,1,2,3,1,1,0,2,1,4,0,3,0,3,0,0,2,1,3,4,0,2,0,1,4,0,3,3,1,4,3,0,1,2,0,1,1,0,0,0,1,2,1,2,3,0,4,3,0,3,1,1,2,1,1,2,0,1,0,4,1,4,0,3,3,3,3,1,4,0,2,1,1,0,2,3,2,4,3,1,2,0,1,0,3,4,1,3,0,2,1,2,3,1,0,2,1,3,3,1,4,1,0,4,4,1,2,2,1,4,1,3,2,1,1,3,3,3,1,3,3,3,1,1,4,3,4,1,1,3,0,4,0,4,4,1,4,1,0,3,4,3,1,4,4,4,3,0,3,3,3,2,2,3,4,2,1,3,1,3,3,3,0,4,4,0,1,3,3,2,2,3,1,1,4,0,2,0,4,4,0,3,3,3,2,0,4,2,2,0,0,1,1,3,1,1,2,1,1,1,2,2,3,4,3,2,2,3,3,4,3,1,2,2,2,0,4,0,2,1,3,1,1,3,1,2,3,0,3,3,2,3,3,1,3,1,2,2,1,1,0,1,3,3,3,0,1,3,2,0,1,4,0,1,3,3,3,3,2,4,2,4,3,1,0,4,1,1,4,1,1,4,1,2,1,0,1,1,1,3,2,2,3,1,1,2,2,2,1,1,1,2,4,1,2,2,3,1,4,0,3,1,1,0,1,0,4,3,3,3,1,2,2,2,2,2,2,4,4,1,4,0,1,0,3,1,1,1,4,3,1,0,2,1,1,3,4,4,4,3,3,4,3,1,0,0,3,4,1,1,3,0,3,0,1,0,0,1,4,1,0,2,3,3,1,0,2,4,3,3,1,0,3,3,2,3,2,2,3,3,3,3,3,1,1,1,2,1,3,2,1,2,3,1,4,3,3,1,0,1,3,0,3,0,0,2,3,0,1,1,2,3,2,3,2,0,2,4,0,0,0,2,1,2,1,4,0,3,0,4,3,2,2,2,2,4,2,0,3,3,2,4,0,1,0,3,0,4,4,4,2,3,4,1,2,3,0,0,4,1,0,3,0,4,4,0,1,0,0,1,1,2,1,3,0,4,3,2,4,2,2,3,4,4,2,4,2,4,4,3,1,2,3,3,0,1,3,2,1,2,3,2,2,0,2,2,2,2,3,2,1,2,0,2,2,3,2,2,0,3,0,4,2,1,4,4,1,3,3,3,0,3,4,4,1,0,3,2,4,3,4,0,0,3,3,2,0,2,0,4,1,0,0,0,4,1,1,0,1,0,0,2,4,4,3,4,4,1,1,3,1,3,3,2,4,1,1,2,3,1,3,2,4,3,1,3,3,4,2,3,2,3,3,3,3,1,2,3,0,0,4,0,4,1,3,1,2,0,1,1,1,3,2,0,2,4,1,2,2,3,4,2,3,2,0,3,0,2,1,2,2,2,3,1,2,1,4,1,3,2,0,2,1,3,2,0,4,1,3,4,3,0,4,4,4,4,0,4,2,1,3,1,2,2,3,0,2,0,2,1,2,2,1,1,3,1,2,3,1,1,3,1,2,4,1,1,3,1,3,1,3,3,1,1,3,1,2,1,0,4,1,1,3,0,3,2,3,0,0,1,3,4,0,4,0,1,3,1,4,0,1,0,1,3,4,4,3,4,2,2,2,0,4,2,0,0,2,2,4,3,1,1,1,2,3,1,0,0,4,3,0,1,1,2,3,2,3,4,0,1,1,3,1,2,2,1,2,1,0,1,3,2,0,2,2,1,4,2,4,3,4,0,3,4,4,4,4,0,2,4,3,0,3,3,2,3,1,3,2,4,1,4,1,1,0,1,3,1,0,1,3,3,3,2,1,3,1,2,2,3,0,0,2,1,2,3,2,1,3,4,0,1,0,0,1,3,2,3,2,2,2,2,2,2,2,2,2,3,3,3,1,3,1,3,1,2,1,1,3,1,1,3,3,3,2,3,2,2,2,2,0,2,1,2,2,2,1,1,0,1,0,1,0,4,4,1,1,0,0,4,4,3,3,2,4,2,4,4,4,1,3,0,0,1,3,3,2,2,4,3,3,2,2,1,1,4,2,2,2,2,3,3,0,2,0,0,4,3,4,0,2,2,0,1,1,3,2,0,4,1,3,2,0,0,3,2,1,0,4,4,3,0,3,2,3,2,4,1,3,0,0,0,4,3,0,2,3,3,1,1,2,3,4,3,1,4,2,2,2,1,4,0,2,4,3,1,0,1,0,4,3,3,1,3,4,4,4,4,0,3,1,3,1,3,3,1,2,2,0,3,3,4,0,0,0,0,0,4,4,1,4,1,1,4,1,4,4,1,4,0,0,4,3,3,1,3,4,1,1,1,4,2,0,2,4,1,2,3,3,1,1,2,2,2,3,2,1,1,4,2,2,3,2,4,0,4,4,2,2,1,1,4,3,2,1,2,3,2,1,2,3,2,0,4,1,0,0,3,1,1,2,2,3,2,0,0,0,0,0,0,4,4,4,0,2,4,2,2,4,4,2,4,4,0,4,2,2,2,1,2,1,3,1,2,3,2,1,3,3,3,3,1,4,4,3,3,1,3,3,1,3,4,1,2,2,1,3,2,0,0,0,1,2,1,1,0,2,2,2,0,3,2,1,1,3,1,1,3,1,1,3,1,1,3,0,0,1,4,4,3,1,4,1,1,4,4,3,4,4,4,3,4,1,3,4,1,2,2,2,2,3,3,2,2,4,4,0,2,1,2,0,3,4,1,3,1,2,0,3,0,4,2,3,4,2,0,1,3,3,1,4,2,3,2,1,2,2,2,2,2,3,4,0,1,0,1,1,3,0,3,0,3,1,4,4,4,0,0,3,3,4,1,4,4,3,4,4,0,0,1,3,4,2,0,1,4,2,4,3,2,4,1,3,4,3,3,0,0,1,3,0,1,1,3,1,1,2,3,0,1,1,1,3,1,3,1,4,4,0,4,4,0,1,1,0,1,3,4,0,4,0,0,4,0,0,2,1,0,1,3,2,0,2,2,3,3,3,3,0,4,4,3,1,3,1,1,3,3,1,1,1,3,3,4,4,3,3,3,1,3,3,1,1,0,3,3,1,3,1,4,3,4,3,0,0,1,3,1,3,3,1,3,1,3,4,1,3,3,3,1,1,3,1,1,3,1,3,0,1,3,3,3,3,3,4,3,1,1,2,0,1,3,1,1,3,1,3,3,1,3,1,3,1,3,1,3,3,3,3,1,1,1,3,1,1,1,1,3,1,3,3,1,3,1,1,4,0,0,4,2,2,4,2,2,2,2,2,2,2,2,2,2,2,2,2,2,2,2,4,2,0,4,2,2,2,2,2,2,2,4,0,0,2,0,0,0,2,0,2,0,2,4,2,2,0,4,2,2,2,0,2,2,0,0,2,2,2,2,2,4,0,2,2,4,0,0,2,4,2,4,2,2,2,4,2,4,0,2,0,3,3,3,0,1,3,1,3,1,1,3,3,2,4,3,3,1,1,2,0,1,2,3,1,4,2,0,3,4,2,4,4,4,1,2,2,4,1,3,1,3,3,4,4,2,3,4,1,4,2,2,2,2,1,3,3,4,2,2,4,4,3,2,2,1,3,4,4,1,3,3,2,4,2,1,2,2,1,0,0,3,3,1,2,3,1,3,0,1,2,3,2,1,3,2,2,3,3,1,3,1,1,2,1,3,1,3,4,1,2,2,1,1,0,3,2,1,0,3,1,2,2,1,0,2,3,0,2,1,4,3,0,3,3,3,2,2,1,3,0,3,3,0,0,3,4,3,4,0,0,0,0,4,0,0,3,1,4,2,4,2,4,2,0,1,3,0,4,2,4,3,0,1,4,4,1,4,4,0,2,2,3,0,0,2,3,0,2,4,0,4,4,0,3,2,3,4,4,3,3,2,0,2,4,4,4,3,2,2,1,0,0,0,1,0,3,1,0,4,0,1,1,1,4,4,4,2,3,4,2,2,4,1,1,3,2,1,0,3,3,3,1,3,0,3,1,4,3,1,0,1,4,4,3,3,2,2,4,4,0,1,2,3,1,3,4,1,3,3,4,0,1,2,3,1,0,4,3,3,3,3,1,1,3,4,0,2,1,2,1,1,4,2,0,3,0,4,3,1,0,0,1,2,3,4,0,1,2,4,4,2,2,2,0,1,2,0,1,3,1,2,0,0,2,2,2,3,4,2,2,0,2,0,0,0,2,4,3,4,1,1,1,1,3,2,4,4,1,2,3,3,2,4,1,4,2,2,1,1,0,3,1,2,2,3,0,3,4,3,0,3,0,1,0,1,3,3,3,1,3,1,1,1,4,1,4,1,1,3,1,0,1,1,2,3,2,0,2,1,3,1,4,3,2,2,1,1,2,1,4,1,2,3,3,1,1,4,4,1,1,4,3,3,3,3,1,2,3,4,4,3,4,3,1,1,1,3,0,1,3,3,4,1,4,3,3,4,3,1,1,0,0,1,0,3,2,1,0,2,0,0,1,2,4,0,4,0,2,1,3,3,2,2,2,3,1,2,3,4,1,4,4,1,0,0,4,3,4,2,0,2,1,4,4,1,2,2,2,2,1,3,3,2,2,2,0,0,4,2,2,2,2,2,2,4,1,2,1,1,2,3,1,2,2,1,3,2,2,3,1,1,1,3,1,2,1,3,2,2,2,3,2,0,4,3,3,0,4,0,4,2,1,4,3,1,3,3,0,1,4,2,2,2,2,3,2,2,2,2,2,2,2,2,2,3,0,4,4,0,4,4,0,4,1,1,1,0,1,3,3,3,3,3,1,1,1,3,4,0,4,1,3,0,4,0,1,0,4,4,4,0,0,0,0,4,4,0,0,0,3,0,4,0,4,0,3,4,3,0,1,4,3,4,3,1,1,0,0,3,0,0,0,4,4,4,3,1,1,1,3,0,0,4,3,3,3,4,4,4,4,4,3,0,3,4,4,3,1,4,3,0,1,0,1,1,3,3,1,0,3,3,4,3,1,4,3,1,0,1,1,0,1,3,0,1,1,1,1,0,4,0,0,3,3,4,1,4,1,3,1,1,1,3,4,0,4,4,4,4,4,4,0,1,4,3,2,3,1,0,4,2,3,3,1,1,0,3,0,0,3,0,3,2,4,4,3,0,4,1,0,1,4,2,2,3,4,0,0,1,1,0,4,1,2,3,4,3,1,0,1,0,4,4,4,0,1,3,0,3,0,3,1,1,2,0,3,1,1,1,0,0,3,2,0,1,1,1,1,1,4,1,0,3,4,0,3,3,3,3,2,1,3,2,4,3,0,0,4,3,0,3,3,1,2,1,0,3,3,0,3,2,4,0,1,0,0,0,4,1,3,0,4,1,3,4,4,3,3,1,0,2,4,0,1,1,4,1,4,3,3,1,2,2,2,3,0,0,2,2,1,1,2,2,1,1,3,3,2,1,1,1,4,3,3,1,1,0,3,2,3,3,4,0,1,1,0,1,3,1,1,3,2,1,1,1,3,3,1,1,4,2,1,2,2,2,2,1,3,3,4,3,3,2,3,1,2,0,1,1,1,4,0,1,4,2,0,4,4,3,0,0,1,1,3,1,1,1,4,1,0,3,0,3,3,3,1,1,0,0,3,3,1,3,1,1,2,1,3,3,1,3,2,3,2,0,2,2,4,0,0,2,2,2,2,0,1,3,3,3,4,4,3,1,0,1,1,4,4,3,1,1,4,4,3,3,2,3,1,2,1,0,2,2,2,4,2,2,4,4,2,0,2,2,4,0,0,0,2,4,0,2,0,2,2,2,2,2,1,3,2,1,3,0,4,0,1,4,1,2,1,3,1,2,2,3,1,3,2,2,1,0,0,3,2,2,0,2,2,2,4,0,3,1,3,1,3,4,3,4,3,3,3,3,1,1,3,1,1,0,1,4,4,1,0,3,3,2,0,2,2,2,2,2,4,0,2,2,1,3,1,1,3,1,3,0,0,1,3,1,1,2,3,1,3,1,1,2,2,2,1,2,2,2,2,2,2,2,1,2,0,0,4,0,1,4,3,3,4,0,0,2,2,2,3,2,0,4,4,0,0,0,1,2,0,3,2,3,1,2,3,4,2,0,3,2,1,4,3,0,4,3,1,1,4,1,3,4,1,1,4,3,1,3,1,1,2,1,3,3,3,1,2,4,3,2,2,0,1,2,3,3,1,3,1,1,2,0,0,1,1,2,3,1,1,4,2,1,1,2,2,0,2,2,4,2,1,2,3,3,1,2,3,2,2,1,1,2,2,3,4,2,2,2,2,2,2,2,1,3,3,1,3,1,2,3,1,3,3,1,1,3,1,1,2,2,1,2,0,1,3,3,2,1,1,1,4,2,2,2,2,0,2,3,2,1,3,3,1,2,1,2,1,3,2,4,0,3,4,1,2,1,2,4,3,1,2,1,1,1,1,2,3,1,3,1,1,2,2,4,0,0,3,1,3,1,3,0,3,3,2,0,3,4,0,3,4,2,2,1,2,2,3,3,0,2,3,2,4,0,0,4,2,0,2,4,2,2,1,4,1,1,2,1,2,1,2,2,2,2,2,2,2,2,2,2,2,2,2,0,2,0,2,1,1,1,3,3,3,2,2,2,3,1,3,2,3,3,2,2,2,2,2,2,2,2,2,2,2,2,2,2,2,2,2,4,2,0,2,2,3,2,2,2,2,3,2,1,1,2,4,3,2,2,2,0,1,1,2,4,1,3,1,0,0,1,1,0,3,3,1,1,0,1,3,3,3,2,0,2,2,2,2,2,2,2,4,2,0,2,2,2,2,2,2,2,2,2,4,2,2,2,2,4,2,2,2,2,0,4,0,2,2,2,2,2,2,2,0,2,2,2,2,2,2,0,2,2,2,2,2,4,4,2,0,2,2,2,2,0,2,2,4,2,0,2,2,2,2,2,0,2,2,0,4,0,0,1,0,4,0,1,0,3,1,4,4,0,0,0,0,4,0,4,4,4,0,0,0,0,3,0,3,3,0,4,4,0,3,4,4,0,4,0,1,0,4,4,4,1,4,0,0,4,3,0,3,0,4,0,2,1,1,2,1,4,1,1,0,1,1,1,4,3,1,3,3,0,4,3,0,0,3,4,0,0,3,0,4,3,4,1,3,1,1,3,4,4,3,1,1,1,1,1,0,3,1,1,4,1,3,3,0,4,1,1,1,3,1,1,3,4,3,0,4,1,3,3,3,1,1,0,1,2,4,0,2,4,4,4,0,2,2,4,2,2,0,0,2,2,2,0,2,2,2,4,2,0,2,4,2,4,2,0,2,2,0,4,2,0,2,2,1,3,3,3,1,0,3,2,0,4,3,1,0,4,1,4,3,3,3,3,4,4,4,3,3,1,1,4,1,1,3,1,4,3,3,3,1,4,1,0,3,1,2,3,4,3,0,3,3,0,1,0,3,4,1,4,0,3,1,0,1,3,0,2,1,0,3,0,1,3,1,4,1,2,2,2,3,3,2,3,3,4,2,1,1,0,4,1,1,2,4,0,1,2,2,0,1,1,1,3,3,4,4,1,1,3,3,2,3,2,2,2,3,4,2,1,1,1,3,2,3,0,2,2,3,1,2,3,2,2,2,1,1,4,2,1,4,2,3,0,3,1,0,0,3,2,2,3,3,3,3,3,3,3,3,3,1,1,0,1,1,1,3,3,0,1,1,2,1,4,1,1,3,3,4,3,2,3,4,0,3,3,4,2,1,1,1,3,2,3,2,4,4,1,3,2,3,1,1,1,1,4,3,1,2,2,3,1,3,1,2,2,2,2,2,3,1,0,1,2,1,4,4,1,1,3,3,1,3,1,1,1,3,0,3,3,3,4,3,3,4,3,2,0,1,0,0,3,0,1,3,2,4,0,2,4,0,0,0,2,2,2,3,4,3,2,3,3,0,0,0,3,1,2,2,3,2,2,2,0,1,3,3,2,4,0,1,2,2,3,2,3,2,0,2,3,1,2,4,0,2,2,4,2,2,2,2,0,2,2,2,2,2,2,2,2,2,2,4,4,4,2,2,2,2,0,2,2,2,0,4,0,2,2,0,0,0,1,1,1,2,2,2,2,3,2,0,3,4,1,1,4,1,3,4,4,0,0,0,2,0,0,2,3,1,2,0,0,4,4,0,2,1,2,0,2,0,1,3,4,3,2,0,4,4,3,1,3,2,2,2,3,2,0,4,0,2,2,4,1,4,2,0,3,1,2,1,1,1,3,3,1,2,0,3,0,2,1,1,2,3,0,3,1,3,0,4,2,3,4,0,0,2,2,1,2,4,1,2,4,2,4,0,0,0,3,4,0,0,2,1,1,2,4,3,3,1,0,1,0,4,0,0,2,4,2,2,2,1,3,0,2,1,1,0,4,0,3,3,1,4,1,3,1,2,3,3,4,2,1,3,3,3,1,0,3,1,1,1,1,3,1,4,1,0,2,2,4,0,1,1,1,2,3,0,3,4,3,2,2,1,3,3,4,0,1,2,3,3,0,3,2,2,0,2,2,2,4,0,4,1,3,3,0,0,3,0,1,0,2,1,0,2,2,4,0,1,0,2,4,2,3,3,2,3,2,3,1,2,3,3,2,2,1,2,4,4,2,2,2,3,1,3,2,2,2,3,3,1,2,3,3,3,0,4,1,2,3,3,3,3,0,4,1,4,1,3,0,2,0,1,2,3,1,0,0,3,3,1,0,4,3,3,3,3,1,3,0,2,3,2,1,1,2,0,0,4,0,0,1,2,3,3,2,2,2,1,4,1,4,3,1,1,1,3,1,1,1,3,4,2,4,1,4,2,2,2,4,4,3,3,3,3,0,4,4,2,2,4,0,2,2,2,2,2,4,0,2,0,2,0,2,4,2,2,2,0,2,2,4,2,2,2,4,4,2,2,2,2,4,2,2,2,2,2,3,0,1,2,1,1,2,1,1,3,3,2,2,1,4,3,1,2,3,3,2,1,3,1,2,3,3,1,1,3,2,1,3,1,1,3,2,0,3,2,1,0,0,3,3,1,3,1,2,1,2,1,3,2,3,3,3,3,1,2,2,1,4,1,2,2,3,3,1,3,1,3,1,2,2,3,0,2,1,3,1,3,3,2,3,2,2,3,1,4,4,2,0,3,2,2,0,4,1,3,1,2,1,3,0,3,4,3,0,2,1,4,0,4,4,3,1,3,2,3,1,2,0,3,1,0,3,0,3,0,1,3,4,3,0,1,1,3,2,0,4,4,1,3,3,3,1,3,2,2,2,1,3,1,1,2,3,2,1,1,2,1,3,2,3,3,2,1,1,1,2,4,1,1,1,3,1,1,1,3,1,4,3,2,1,1,1,2,2,1,2,1,2,2,1,2,1,3,2,1,1,1,3,3,2,2,2,2,1,2,4,0,2,0,1,3,3,0,1,3,3,3,3,1,4,4,2,1,2,0,2,2,2,0,2,2,2,2,4,0,3,2,0,1,4,4,0,0,0,3,1,0,3,3,2,4,3,1,3,1,3,4,3,0,1,3,1,1,3,1,3,1,3,1,2,1,1,1,3,1,3,4,1,1,3,2,3,1,3,4,2,3,0,1,4,1,3,2,1,1,1,1,3,3,0,4,0,4,4,1,1,3,3,0,2,0,3,4,0,4,1,3,2,0,3,3,1,0,1,4,0,1,1,0,3,2,4,3,3,3,4,1,0,0,2,4,4,2,2,2,2,2,2,2,3,1,2,4,3,2,1,2,2,0,2,2,2,4,4,4,2,1,2,3,1,3,4,1,4,2,2,4,2,3,2,2,2,2,2,2,0,4,2,2,2,4,2,4,2,2,0,2,2,2,2,2,3,2,2,2,3,2,0,2,4,2,3,1,3,2,1,4,2,2,2,2,2,2,2,3,1,3,4,2,1,3,3,1,2,2,2,2,2,4,0,0,2,2,3,4,0,2,4,2,1,1,4,0,0,4,2,1,2,0,1,1,0,3,0,0,3,3,4,1,4,4,4,2,4,2,1,1,2,2,3,1,1,3,2,1,3,1,4,1,4,3,1,3,1,3,3,1,3,4,3,4,1,3,3,3,1,0,1,0,3,3,3,1,2,3,1,2,0,2,0,0,2,0,4,3,0,4,4,3,1,1,1,1,0,1,3,2,1,3,2,4,1,0,0,1,3,0,3,1,3,2,1,3,3,3,1,3,3,1,3,1,1,1,3,1,2,1,2,3,0,2,3,2,1,1,3,2,1,1,2,3,3,1,3,1,0,1,2,1,2,2,1,3,3,1,0,3,4,4,3,1,1,0,2,0,4,3,0,0,2,3,3,1,1,0,3,1,0,2,3,4,2,3,3,0,3,1,3,1,4,1,1,3,3,0,1,3,1,3,3,2,2,3,1,0,1,3,3,0,3,0,4,3,1,1,1,3,0,2,1,2,4,1,1,4,2,1,3,1,3,0,4,1,1,0,1,4,2,3,1,4,0,4,4,0,0,1,4,1,1,1,4,4,0,0,4,2,0,1,4,4,2,0,2,4,4,4,2,0,4,3,4,2,0,3,0,0,4,3,3,4,2,0,2,2,2,3,1,4,0,4,0,4,2,0,0,3,4,2,4,0,1,3,1,4,0,2,1,2,0,4,4,3,2,2,3,4,2,2,1,3,2,2,2,2,0,2,2,2,4,2,2,1,4,0,4,4,4,0,4,1,0,0,0,4,4,0,0,3,4,4,3,4,4,4,4,0,3,1,0,1,4,4,0,0,4,0,4,4,4,2,3,2,2,2,4,1,0,4,1,0,4,1,4,0,0,0,3,4,1,4,4,3,4,0,3,1,0,0,2,1,0,1,4,1,4,3,3,3,4,0,2,1,3,2,2,3,3,0,1,3,1,4,4,3,0,3,0,0,4,2,1,4,1,0,1,1,0,0,3,3,3,1,0,1,1,0,1,3,1,1,1,2,2,2,4,1,0,4,3,4,3,3,3,4,1,3,3,4,4,0,2,0,0,4,2,2,3,0,4,0,4,0,1,0,3,3,2,2,2,4,3,0,1,1,0,0,1,4,4,3,1,0,4,0,3,4,4,3,3,0,3,4,2,4,0,0,1,4,2,0,3,0,0,2,0,1,1,4,0,1,1,3,2,1,4,2,0,4,3,2,0,1,4,4,3,3,1,2,4,2,0,4,1,1,3,1,1,0,0,3,2,2,1,2,3,4,3,3,3,3,3,2,2,3,2,2,2,3,0,4,1,0,3,3,4,2,3,1,1,0,2,1,2,2,3,3,3,1,0,2,1,2,1,1,2,2,3,2,0,1,1,2,2,2,1,2,1,3,2,3,4,3,3,1,2,3,3,3,1,4,1,4,4,0,3,4,4,3,4,1,4,4,3,2,0,2,0,2,4,0,1,4,1,4,1,4,4,1,3,1,2,1,1,2,3,1,3,1,2,2,3,4,0,4,3,4,0,4,3,1,3,1,1,4,3,0,0,3,1,1,1,3,4,4,3,4,1,0,4,3,1,4,1,0,3,0,1,2,3,2,3,1,3,3,1,4,2,0,1,1,2,4,4,0,4,2,2,4,3,1,3,3,3,4,1,3,1,2,2,4,1,2,1,3,2,1,1,3,1,3,2,3,1,3,2,1,0,1,2,1,1,2,3,2,1,3,1,2,2,4,3,2,3,1,3,1,1,3,3,2,1,4,2,3,2,3,3,1,1,1,3,1,4,3,3,3,1,2,1,1,4,3,3,2,3,1,1,3,3,3,4,1,0,3,2,4,3,1,3,2,1,3,2,2,3,1,3,2,1,2,4,1,3,2,2,3,3,3,2,2,3,1,1,3,2,2,1,2,3,1,2,2,3,3,2,1,4,1,1,2,2,4,3,2,0,2,2,1,1,2,2,1,3,3,1,3,3,3,3,2,1,3,4,1,1,3,1,1,0,3,3,0,3,1,1,0,0,0,0,1,4,1,3,2,1,0,3,3,2,0,1,3,3,3,4,1,4,2,2,1,1,4,3,3,2,4,3,4,1,2,3,2,3,3,1,4,4,3,2,4,2,0,4,1,4,1,1,2,3,4,0,1,1,4,3,4,3,3,0,0,3,2,3,2,0,1,3,4,0,1,2,4,1,1,1,0,0,3,1,0,2,1,1,4,3,3,0,2,1,1,4,0,4,0,1,0,3,3,3,1,1,2,1,0,0,3,2,3,1,3,4,2,2,4,2,0,1,0,4,0,2,4,1,1,2,1,0,0,2,0,0,2,2,1,2,3,4,0,3,0,2,3,2,4,0,3,1,4,1,3,2,4,4,4,0,4,4,0,0,4,4,0,1,0,1,0,0,4,3,0,2,1,0,0,3,0,3,0,4,0,3,0,0,2,4,2,4,0,4,4,0,2,4,2,4,0,2,0,2,4,4,4,2,4,0,2,4,2,3,0,4,3,0,3,1,4,2,0,4,3,4,2,2,2,1,1,4,2,0,0,2,0,3,1,0,2,3,3,4,4,2,4,2,3,2,0,0,2,3,4,1,3,2,2,0,4,2,1,4,0,3,1,0,1,3,2,3,1,3,2,1,4,0,4,3,3,0,3,3,1,3,4,3,1,3,1,3,3,0,0,3,3,4,1,1,3,3,3,1,1,2,0,0,0,1,3,1,0,1,3,3,0,1,0,1,2,2,3,1,3,1,1,4,2,1,2,2,2,4,0,1,1,1,0,2,4,3,2,2,4,1,3,1,2,0,2,2,2,4,4,0,0,2,2,2,2,4,0,2,2,1,0,4,2,0,2,3,2,2,3,1,4,1,3,4,4,4,3,3,0,1,1,4,1,4,4,4,0,4,1,0,3,3,4,1,1,2,3,1,3,0,3,3,3,3,1,1,3,3,1,1,2,1,1,1,3,0,0,3,1,2,1,3,2,4,3,1,1,1,1,2,3,3,3,3,4,1,1,2,3,0,3,2,2,3,4,2,3,3,2,3,0,1,2,1,0,2,2,2,1,3,4,4,2,1,4,4,3,1,1,2,1,3,1,3,0,1,3,2,1,2,0,3,1,3,0,1,2,4,4,2,4,2,2,0,1,1,1,0,2,1,3,1,1,1,3,4,3,0,4,1,3,3,3,2,1,4,3,4,0,4,0,4,4,1,2,1,1,1,1,2,2,1,3,1,2,3,0,2,1,0,4,3,1,3,3,4,1,3,3,1,3,0,3,0,4,4,0,0,0,0,4,3,3,4,0,4,4,4,2,0,2,0,0,4,1,0,0,0,4,4,0,4,0,0,4,0,4,4,0,0,1,4,3,4,1,0,4,4,4,0,0,1,2,4,4,4,4,4,0,0,0,0,0,3,0,4,4,0,4,0,4,4,0,4,0,0,4,0,0,3,0,4,0,0,0,0,4,0,2,3,4,4,4,0,1,4,0,4,4,0,4,0,4,4,0,4,1,0,0,4,0,0,1,0,4,4,1,4,1,4,4,1,0,1,1,1,1,3,1,1,4,1,2,0,2,3,2,3,2,1,1,3,4,3,1,1,3,1,3,0,0,1,2,1,4,3,0,0,0,4,0,1,1,2,0,1,1,3,2,2,1,3,2,1,3,1,2,2,3,2,2,2,1,2,2,2,3,1,3,3,0,3,1,3,0,4,0,1,2,2,0,4,1,3,2,2,1,1,1,2,1,0,1,1,1,1,2,1,1,0,1,3,4,2,1,3,1,3,0,4,1,3,4,0,2,3,4,4,0,0,4,4,4,1,2,0,0,0,0,0,2,0,1,2,0,2,2,4,4,0,4,0,0,4,0,2,3,4,0,2,2,2,3,2,1,0,2,2,0,2,3,2,2,2,4,4,0,4,4,2,2,0,2,4,2,2,1,4,1,0,2,1,1,1,1,1,1,0,3,4,0,0,3,1,2,3,2,4,3,4,4,1,3,1,3,1,4,1,0,0,2,3,3,1,1,3,1,3,1,1,1,4,1,1,2,2,3,3,0,0,1,2,4,4,2,4,3,2,1,2,2,1,2,2,3,2,2,2,2,3,3,2,3,1,1,1,3,0,3,3,3,3,2,3,4,1,4,0,2,3,3,0,0,4,3,1,0,3,3,4,0,1,2,1,1,4,3,1,1,0,2,4,4,2,4,2,1,2,4,2,0,2,2,0,4,2,2,2,0,2,4,4,2,4,2,2,3,4,2,1,4,4,3,4,1,2,1,0,1,1,4,4,0,2,4,4,0,2,0,3,0,2,4,3,4,0,3,0,4,2,1,3,0,0,1,0,0,4,4,0,3,0,0,0,3,1,3,0,2,3,0,2,3,3,0,0,4,2,3,4,1,2,2,2,4,2,1,0,2,0,4,0,0,2,2,0,1,3,2,2,2,2,3,3,2,3,0,2,3,4,4,1,3,3,4,1,4,1,1,3,0,1,1,4,0,1,3,0,0,2,0,1,2,3,2,2,1,0,4,2,1,1,0,1,1,0,3,1,3,1,0,2,1,2,0,1,1,1,2,3,0,2,2,3,3,1,1,0,3,3,3,4,4,0,0,4,4,0,0,0,4,4,0,0,4,3,4,0,0,3,2,2,2,3,1,3,2,4,0,3,3,0,2,2,1,1,4,1,1,2,0,1,1,3,2,4,2,3,4,2,0,2,0,0,1,1,0,1,3,0,3,1,1,3,4,0,1,3,2,4,2,2,1,0,3,0,1,1,0,1,3,0,0,1,0,1,1,3,4,0,3,3,0,2,0,2,4,3,1,1,1,3,1,1,1,3,1,3,3,1,3,4,1,3,0,1,2,4,1,3,2,0,0,0,1,2,0,3,4,0,0,1,4,4,2,2,0,3,4,4,1,1,4,2,3,1,4,2,2,2,2,0,3,3,2,2,3,2,4,1,4,4,4,2,2,1,3,4,0,0,4,2,0,3,2,3,1,3,3,2,3,2,4,0,0,2,3,4,3,2,2,4,2,1,2,4,0,4,4,0,4,3,1,4,3,3,3,2,4,1,1,3,4,3,0,3,0,3,3,4,4,4,4,0,0,0,0,4,4,2,2,3,1,2,4,2,4,1,3,4,0,2,3,1,1,1,3,2,4,0,0,4,4,3,2,0,1,3,2,3,4,1,3,2,1,1,3,2,2,2,3,2,3,1,3,4,2,4,4,3,1,3,1,1,4,1,3,0,0,2,2,2,4,2,4,2,2,2,2,0,0,0,4,2,2,1,3,3,1,0,2,2,4,1,1,2,1,1,1,2,0,4,0,3,4,2,3,3,1,3,1,3,1,2,2,2,1,2,3,3,2,4,2,0,0,2,1,4,0,1,4,0,4,0,3,0,4,1,1,1,1,4,1,1,4,4,1,0,4,2,0,0,2,4,4,4,3,4,0,0,4,4,3,2,2,1,2,2,3,2,2,2,3,3,2,2,3,2,3,1,3,1,3,2,3,2,3,4,3,4,1,0,4,0,0,2,0,2,0,2,2,2,4,0,2,2,2,2,0,4,2,2,4,2,2,4,2,2,2,0,4,4,0,2,4,2,1,3,2,1,2,3,1,4,2,0,1,1,3,2,3,3,3,3,3,4,3,1,3,3,2,2,3,1,0,0,2,2,1,3,3,3,0,1,2,1,1,3,2,4,2,1,0,3,1,2,3,4,1,2,2,0,3,0,3,4,4,1,2,3,1,1,1,3,4,0,4,4,1,1,2,1,3,3,0,1,2,1,4,4,3,4,4,0,4,0,3,0,3,4,0,0,0,4,0,0,3,3,3,2,1,3,4,0,1,1,2,2,1,3,3,2,2,3,0,3,2,4,1,2,4,0,1,0,1,1,3,0,0,1,2,4,0,3,3,0,1,1,1,3,3,2,0,4,2,4,2,0,4,3,0,1,1,2,1,3,0,4,4,4,1,2,2,3,1,4,3,2,1,1,1,0,2,1,1,1,3,1,1,0,4,2,0,0,1,3,1,3,1,1,1,2,3,1,1,2,0,1,0,2,1,4,1,4,4,1,2,3,0,1,1,1,3,3,3,1,0,0,0,4,1,3,2,4,1,3,3,1,1,3,3,2,1,4,3,3,3,3,4,3,2,3,1,1,4,3,0,3,4,0,2,3,3,3,3,2,1,1,3,1,1,1,1,3,4,3,2,1,1,4,4,1,3,2,2,1,1,3,1,4,2,2,1,3,3,1,1,3,1,0,4,1,0,4,1,1,4,3,1,4,3,4,3,3,0,1,4,0,2,4,3,2,2,2,3,1,1,3,4,2,2,1,4,3,4,2,4,2,4,1,3,2,4,4,2,4,3,1,1,1,1,0,3,0,4,0,4,0,3,1,3,3,3,4,2,4,2,4,0,0,2,3,1,2,1,3,0,1,1,2,1,4,4,2,2,1,3,3,2,2,1,2,2,3,2,0,3,1,1,4,4,1,0,1,2,1,3,3,4,3,1,3,4,4,0,2,0,4,0,0,0,4,2,2,2,2,2,0,0,4,2,3,3,1,3,3,2,2,2,2,2,2,2,2,2,2,0,0,4,0,0,0,0,0,4,0,4,4,4,0,0,4,0,0,4,4,4,0,2,2,2,2,2,2,2,2,1,1,3,0,1,2,3,2,3,1,3,3,1,1,1,4,4,4,0,4,4,4,4,0,4,4,4,0,3,0,1,1,3,3,2,2,1,3,2,3,2,1,1,1,3,3,3,1,1,1,1,4,0,0,0,1,4,3,1,2,4,4,0,0,0,4,2,2,4,4,2,0,4,0,0,4,0,4,0,4,1,3,1,3,3,1,1,2,3,4,2,1,1,1,2,0,3,3,1,3,2,0,4,0,2,4,4,4,2,4,2,4,0,0,2,2,4,4,2,4,3,2,2,0,2,4,2,2,4,0,2,3,4,1,3,1,3,1,1,1,1,3,3,1,2,1,3,3,1,1,3,3,1,3,3,1,1,3,2,3,4,1,1,1,1,1,2,2,1,4,1,1,3,3,2,3,2,1,3,1,1,1,2,1,3,0,1,3,1,3,3,3,3,3,3,2,1,2,2,3,1,2,2,1,1,1,3,1,0,2,0,4,1,1,1,3,2,1,3,3,3,4,4,4,1,2,3,3,1,2,4,3,2,2,2,1,3,1,2,2,2,2,2,4,2,2,0,2,2,2,2,2,2,2,2,2,2,2,2,2,4,2,2,2,2,2,2,2,2,2,2,2,4,2,4,2,2,2,2,2,0,4,4,4,2,2,2,2,2,4,2,2,2,0,2,2,2,2,2,2,2,2,2,2,4,2,2,2,2,2,2,1,3,2,2,0,3,2,2,2,2,2,1,3,1,2,2,2,2,2,0,1,1,1,2,2,2,3,2,0,2,2,4,4,2,2,4,2,2,3,4,4,0,2,2,4,2,0,2,4,4,0,0,0,4,0,0,2,4,0,2,2,0,4,2,0,0,0,0,2,0,0,4,3,3,0,0,0,3,0,0,2,2,4,1,2,2,1,1,3,2,3,0,1,4,4,0,3,4,4,2,1,2,1,3,3,1,0,3,2,0,3,0,4,1,4,0,3,0,4,1,4,2,3,0,3,1,3,2,2,2,4,0,3,1,0,3,0,3,0,0,4,0,1,2,0,2,0,1,3,1,2,4,1,0,3,2,3,2,0,2,4,0,4,0,3,3,3,4,1,2,1,2,1,3,3,4,4,2,1,1,2,2,4,2,2,1,1,1,1,1,1,2,1,3,2,4,4,1,1,0,0,4,0,3,1,2,4,4,3,4,1,1,3,1,3,3,3,1,3,1,3,3,3,3,1,3,1,3,2,3,4,0,0,1,3,3,2,2,2,1,0,1,3,4,4,0,0,2,2,4,3,3,3,1,1,3,2,2,3,2,3,1,3,4,4,2,1,1,1,1,3,3,0,0,3,2,1,3,3,3,1,1,1,1,2,1,3,2,3,3,4,0,4,0,0,3,4,2,1,1,3,4,1,1,2,4,2,1,1,3,1,3,3,3,1,3,4,0,2,2,4,2,0,1,0,2,2,2,2,4,2,4,4,2,4,2,4,0,0,2,3,1,2,4,2,0,0,4,3,2,0,0,1,2,3,2,2,0,1,1,2,2,1,1,3,2,2,1,3,2,1,3,3,2,1,3,1,2,2,3,4,1,3,3,2,3,1,3,3,1,0,4,3,0,0,1,3,0,1,0,0,1,3,4,1,1,1,3,2,4,0,2,2,3,2,4,3,0,4,1,3,0,0,2,0,2,1,3,1,3,3,3,2,0,3,4,3,3,4,2,4,1,2,3,1,3,0,2,1,1,1,2,3,1,3,3,2,2,1,1,3,3,1,3,2,1,0,1,1,1,1,1,3,1,1,3,3,1,4,3,1,1,1,3,1,1,3,1,3,1,2,3,3,1,1,4,1,3,1,3,3,3,3,3,3,1,2,2,2,3,1,1,1,1,1,3,1,0,3,2,1,3,0,2,4,4,3,1,2,3,3,3,1,4,2,3,1,3,1,3,1,1,1,0,4,1,2,3,2,4,2,1,2,4,2,1,2,3,2,1,0,2,1,2,4,1,1,2,0,0,0,2,2,2,3,0,1,0,2,2,4,2,2,2,2,2,2,2,2,3,2,3,2,2,2,2,2,1,2,2,2,2,2,2,3,2,1,2,2,2,2,2,4,2,2,2,2,3,2,3,3,3,1,2,0,4,0,0,4,2,2,2,2,2,2,2,4,2,2,2,0,0,0,2,2,2,2,2,0,2,2,2,2,4,2,2,2,2,2,2,1,2,2,2,2,2,0,0,2,2,2,0,2,2,4,2,0,3,1,2,1,2,2,2,0,2,2,2,2,3,1,3,1,2,2,1,1,2,2,2,2,2,2,4,2,2,4,0,1,2,2,2,2,2,2,2,2,2,2,2,2,2,2,2,2,4,2,2,4,0,0,2,2,2,2,4,4,2,0,2,0,4,4,4,2,4,1,0,4,2,4,2,3,3,0,4,2,4,2,2,2,0,0,0,0,2,2,2,4,2,4,0,1,0,3,4,1,4,0,1,3,3,3,1,1,1,4,2,3,1,4,3,3,2,1,3,4,4,0,3,3,0,3,3,4,1,3,0,2,3,1,3,2,1,4,1,3,2,0,3,1,3,3,4,4,3,0,1,3,1,4,1,3,4,3,0,2,1,3,0,0,1,3,1,1,1,0,1,4,4,0,4,0,4,0,4,0,4,3,0,3,3,0,4,4,0,4,0,2,4,0,2,0,3,0,4,4,1,2,0,0,3,2,3,3,0,3,4,3,2,1,3,0,3,0,4,4,4,1,3,0,2,4,4,3,4,2,2,1,3,1,0,4,1,1,3,3,3,1,2,0,1,2,2,0,2,4,4,0,2,4,0,0,2,2,4,4,2,2,4,2,1,3,2,4,3,3,2,3,2,2,2,3,3,1,2,0,3,2,2,3,3,1,3,1,1,0,3,1,1,4,2,4,2,1,0,3,3,3,1,3,1,4,1,1,3,1,1,3,4,0,1,0,0,3,3,1,1,2,2,0,4,3,2,4,1,4,0,3,2,0,0,0,0,3,4,2,0,3,3,0,0,4,2,2,0,2,0,0,4,0,2,2,2,2,0,4,4,0,2,0,2,4,0,4,4,0,4,0,4,0,2,4,2,0,0,4,4,4,3,1,0,1,4,4,3,4,4,4,0,3,4,4,4,4,1,4,1,4,3,1,0,1,0,3,2,3,0,4,4,1,4,0,0,4,2,3,1,1,1,3,1,3,3,1,3,1,3,1,2,1,4,2,1,3,4,4,4,0,4,2,0,0,3,4,0,3,3,4,3,0,2,1,3,3,0,0,2,1,1,0,0,1,1,2,2,4,1,0,0,0,4,3,2,3,1,3,0,2,1,0,4,4,2,1,3,3,1,0,1,1,1,1,1,0,4,1,1,0,3,0,2,3,3,4,4,3,0,4,0,2,0,0,3,1,3,3,4,3,1,2,2,4,2,3,3,2,2,1,3,3,0,3,3,4,3,3,2,2,2,1,2,2,3,1,2,1,4,4,4,4,0,0,1,4,1,1,4,3,1,2,2,3,0,2,2,2,1,1,2,0,2,2,2,2,4,2,2,3,2,1,4,1,1,3,3,1,3,1,3,1,1,1,2,1,2,2,1,3,1,3,4,2,2,1,4,3,2,4,3,1,3,4,2,1,4,2,2,2,2,2,2,2,2,2,2,1,3,2,2,4,2,3,1,3,1,3,1,3,2,0,2,3,3,3,1,3,0,0,3,4,1,3,1,2,3,1,3,4,3,3,1,3,1,3,3,1,3,4,1,1,0,1,1,1,3,3,4,1,3,3,2,3,1,0,2,2,2,1,1,3,3,0,4,2,3,2,1,3,3,3,1,4,4,1,2,3,3,2,0,2,1,2,3,2,2,2,1,1,0,2,0,0,1,3,3,2,1,3,2,1,1,1,1,3,1,2,3,2,3,2,2,2,1,2,1,4,1,3,2,4,4,0,0,4,0,0,1,0,0,1,2,3,4,3,0,3,4,4,1,2,2,2,4,1,4,1,3,0,2,0,3,3,3,1,1,1,0,4,1,0,1,3,1,2,1,2,2,4,2,0,4,0,2,1,3,2,4,3,2,2,1,2,1,0,0,0,0,4,4,1,0,0,1,0,4,0,3,3,0,3,0,4,4,1,3,0,4,2,2,1,3,1,1,1,4,1,4,2,3,3,1,0,4,3,1,3,4,3,0,3,0,2,1,0,4,2,2,2,3,3,0,2,0,3,1,2,1,1,3,4,0,0,0,4,4,2,4,0,2,0,4,4,1,3,4,4,4,4,3,0,2,0,4,0,2,4,0,4,3,0,4,2,2,1,0,4,0,0,0,2,1,0,4,4,2,1,4,4,3,0,4,2,2,4,0,4,4,4,3,2,0,4,0,2,0,1,1,4,1,0,2,4,3,2,1,1,3,3,4,1,2,0,0,0,4
B105,0,1,1,3,3,0,3,3,3,2,2,3,3,0,0,2,2,0,1,4,4,1,2,0,1,4,1,1,3,3,1,1,3,3,2,2,3,1,4,1,1,3,1,1,0,0,2,0,3,4,2,2,2,2,3,2,1,0,0,3,4,0,3,0,3,0,0,2,2,2,2,4,4,0,2,2,1,2,0,0,4,1,2,3,2,2,2,2,3,3,1,2,2,3,2,3,2,1,3,3,3,1,3,2,2,2,1,2,2,3,3,3,1,2,4,1,2,2,1,1,2,1,3,3,4,0,3,2,3,3,0,2,3,1,3,0,2,1,3,1,4,1,1,2,2,0,2,3,1,1,3,1,2,2,3,1,1,1,1,2,3,3,0,4,1,3,3,1,3,1,2,1,4,3,2,3,3,4,0,1,2,3,0,4,1,3,1,0,2,1,3,1,1,3,4,1,0,3,2,3,0,4,1,0,1,1,4,3,3,1,1,0,1,3,0,0,4,2,0,1,3,2,3,2,3,1,1,0,0,0,4,2,2,4,2,4,2,4,4,4,4,4,1,2,0,0,3,1,4,1,1,1,3,1,4,1,1,2,1,3,3,1,2,3,2,0,3,3,3,1,3,3,4,1,3,4,1,2,2,1,3,1,1,4,3,3,4,1,4,2,0,1,3,3,1,1,3,2,2,0,0,0,1,1,1,0,3,3,4,3,4,1,4,4,3,1,2,0,1,2,3,4,1,1,2,1,3,1,4,3,1,1,3,3,3,1,3,1,3,3,1,3,3,3,2,3,1,3,4,1,4,3,1,3,3,0,2,2,0,2,2,2,4,4,0,4,2,3,0,3,4,1,2,2,3,3,1,2,2,3,2,1,2,3,3,3,2,1,1,1,1,4,2,1,2,1,0,4,0,3,1,4,0,1,2,1,0,0,3,3,1,1,2,1,1,1,3,3,4,1,1,3,1,2,2,1,3,1,1,0,0,1,3,4,2,4,4,4,1,3,4,1,1,1,3,3,0,3,1,0,2,1,1,4,1,3,0,0,4,0,4,4,3,3,1,1,1,4,0,4,1,3,2,4,2,0,1,0,0,3,0,0,2,1,0,1,0,2,1,0,1,2,0,3,3,4,2,0,1,0,0,0,1,1,4,2,2,0,4,0,2,3,1,3,1,4,0,2,3,3,1,3,2,1,1,1,3,1,2,3,2,2,3,3,4,1,4,1,1,4,3,4,3,0,3,0,1,1,4,3,3,0,4,1,2,0,3,3,3,4,4,1,3,1,1,3,2,1,4,1,2,1,2,2,4,0,0,0,4,2,2,0,4,2,4,2,2,2,2,2,0,0,1,1,3,0,2,2,2,1,0,0,3,2,1,4,1,2,0,4,1,1,0,0,1,1,1,1,3,2,1,0,0,4,3,0,2,0,1,0,2,3,1,4,0,1,0,1,1,3,1,1,1,4,1,0,0,4,4,3,4,1,4,4,1,0,1,0,4,2,1,2,4,2,3,4,4,3,2,1,3,2,3,1,4,1,0,1,1,2,2,4,3,4,1,4,1,4,3,4,1,3,1,1,1,1,3,1,1,2,2,1,1,1,2,3,4,4,0,4,0,4,4,0,1,3,2,1,2,3,0,3,4,3,4,3,4,1,3,3,1,3,1,3,1,0,1,1,1,4,3,3,3,0,4,3,3,4,0,0,3,3,4,2,0,0,4,4,0,4,1,1,4,3,2,3,2,0,2,1,0,4,4,1,2,1,3,2,3,1,1,2,3,3,3,2,2,3,1,3,1,0,4,2,2,1,2,0,3,1,3,2,2,2,2,1,4,1,4,0,4,3,3,3,3,3,0,1,3,1,3,1,2,2,2,2,1,1,3,1,0,1,0,4,0,0,4,0,4,4,4,4,0,3,0,4,1,4,0,1,0,4,4,3,1,1,3,1,0,2,4,3,1,0,2,3,0,0,2,4,0,4,4,4,0,4,3,4,0,3,0,1,1,3,1,2,1,1,3,4,3,4,1,1,1,3,3,2,1,1,1,2,3,3,3,2,4,3,3,1,1,1,3,1,1,2,2,1,3,3,0,3,3,4,0,3,2,3,3,4,1,1,3,3,3,2,1,3,1,3,3,1,2,2,1,3,3,4,3,2,1,3,3,2,1,2,2,2,2,1,3,2,3,3,3,2,2,1,1,3,3,3,3,2,1,3,3,2,3,0,3,1,3,3,2,1,2,1,3,2,2,2,2,1,1,1,4,2,2,3,4,3,0,2,1,1,1,1,3,1,2,0,0,2,2,2,2,0,3,3,1,2,3,1,3,3,3,3,2,3,1,1,0,1,1,0,0,4,3,4,3,4,1,0,2,3,2,3,0,4,2,4,4,3,2,4,3,3,1,3,4,2,0,2,2,3,4,0,1,2,0,1,3,1,3,4,2,2,4,2,3,0,0,4,2,4,3,4,2,4,2,1,1,1,2,2,2,2,4,0,1,4,3,1,3,2,1,0,4,4,1,1,2,2,3,1,2,4,3,2,4,4,0,3,0,1,2,2,4,3,3,0,1,3,3,1,4,1,3,4,3,0,2,1,1,0,2,4,3,2,1,3,3,3,1,4,0,0,3,0,4,0,3,1,3,4,1,1,4,3,1,3,3,2,1,0,3,1,0,3,3,1,1,0,1,3,4,4,3,3,2,1,1,4,4,0,0,1,0,2,1,3,2,2,4,3,0,0,0,1,4,2,2,4,2,2,2,2,4,4,1,1,4,0,4,3,2,3,2,1,3,0,2,3,1,2,0,1,2,4,0,3,0,2,0,0,3,1,3,4,0,3,0,1,4,0,3,2,0,4,2,0,2,2,0,0,0,0,1,0,0,3,0,3,2,0,4,3,0,2,2,1,3,0,1,3,0,1,0,4,2,3,0,3,2,2,2,1,4,1,1,1,2,0,3,3,3,4,3,1,1,0,2,1,3,4,0,4,0,2,0,2,2,2,0,2,0,3,3,1,4,1,0,4,4,1,2,1,1,4,1,3,2,1,1,3,3,3,1,3,3,3,1,1,4,3,3,1,1,3,0,3,0,4,3,1,3,1,0,4,4,3,2,4,4,4,3,0,3,3,3,1,1,3,4,1,1,4,1,3,3,3,0,3,4,0,1,3,4,3,1,4,1,1,4,0,1,0,4,4,0,4,4,3,1,0,4,1,3,0,0,0,0,3,0,0,3,1,1,1,2,2,4,2,3,2,2,4,3,4,4,1,2,2,2,0,4,0,3,1,4,0,1,3,1,1,3,0,3,3,1,3,4,1,4,0,3,1,2,0,1,2,2,3,3,0,1,3,2,0,2,4,0,2,2,3,2,3,3,3,2,4,2,1,1,4,1,1,4,0,2,3,1,1,0,1,1,1,1,2,3,3,3,0,1,3,2,3,1,2,2,1,4,2,3,1,4,1,4,0,2,1,1,0,1,0,4,2,3,2,1,2,2,2,2,2,2,3,3,2,2,1,0,1,3,1,3,1,3,4,0,1,1,0,1,1,3,3,3,1,4,2,3,1,2,1,1,2,1,1,3,0,3,0,3,0,2,3,4,2,3,3,1,4,0,2,1,3,3,3,2,2,4,3,3,3,3,1,4,4,2,4,2,0,2,0,2,0,4,4,0,2,4,0,4,4,4,0,0,0,4,0,4,0,0,2,4,0,0,0,4,4,0,4,4,3,3,4,3,3,3,0,0,0,0,4,2,4,2,2,4,3,3,1,1,2,3,1,4,4,2,3,1,1,1,3,1,3,3,3,1,3,3,3,0,1,1,1,4,1,1,3,1,3,3,1,0,1,1,0,1,1,1,4,1,4,3,1,3,2,1,3,3,3,1,4,1,3,3,2,0,2,3,4,1,1,4,1,1,1,3,3,3,1,1,3,3,2,3,1,1,2,0,3,3,3,3,1,0,4,0,4,2,1,4,4,1,3,4,3,0,3,3,3,2,0,3,3,3,4,4,1,1,3,3,2,1,2,1,3,0,1,1,1,4,1,2,1,0,1,1,2,3,3,3,3,4,0,0,3,1,3,3,2,4,1,1,2,3,1,3,3,4,3,1,3,3,4,2,3,2,3,3,3,3,1,4,3,0,0,4,0,4,1,3,1,3,1,1,1,1,3,1,0,3,4,1,3,2,3,4,3,3,2,1,3,0,1,1,2,2,3,4,0,2,1,3,3,4,3,1,2,0,4,3,1,3,3,3,2,2,1,2,3,4,2,1,3,1,1,3,1,2,1,4,2,1,1,2,2,2,1,0,0,2,2,3,4,2,0,4,2,1,3,0,0,4,0,4,3,1,4,0,0,4,0,3,0,0,4,0,3,4,0,4,1,4,0,0,0,4,4,0,4,0,0,4,0,4,0,0,0,0,4,4,4,4,4,3,3,3,0,4,3,0,0,1,1,4,1,0,3,2,3,2,2,0,1,4,1,0,3,0,1,1,1,1,4,0,2,0,2,1,2,3,1,2,1,1,1,2,1,1,1,1,0,4,3,4,3,4,0,2,4,4,4,4,0,2,4,4,0,4,4,0,4,0,4,4,3,0,3,0,0,1,1,4,0,2,0,3,4,3,1,0,4,0,0,3,4,1,0,3,1,0,3,1,2,2,2,0,0,2,2,2,3,3,3,2,2,2,2,2,2,2,1,3,3,3,3,1,2,1,3,1,1,1,2,3,1,1,3,3,3,2,2,3,2,2,2,0,2,1,2,2,2,1,1,0,1,0,1,0,4,4,1,1,0,0,4,4,4,3,3,4,3,4,4,4,1,3,0,0,0,4,3,3,2,4,2,3,1,1,1,0,4,1,2,3,3,3,4,0,3,0,0,4,2,4,0,2,3,0,1,0,3,2,0,4,1,3,2,0,0,3,2,0,0,4,4,4,0,3,3,3,3,4,0,4,0,0,0,4,3,0,1,4,4,0,3,3,2,4,3,1,2,1,2,3,0,4,0,2,4,2,0,0,3,0,4,3,4,0,4,4,4,4,4,0,3,1,3,1,3,3,1,2,2,0,3,3,3,0,0,0,0,1,3,4,1,4,1,1,4,1,4,4,1,4,0,0,4,3,3,1,3,4,1,1,1,4,2,0,2,4,1,2,3,3,1,1,2,2,3,3,2,1,1,4,2,2,3,2,4,0,4,4,2,2,0,0,3,3,2,2,3,2,3,1,1,3,3,0,4,1,0,0,3,1,1,1,3,4,1,1,1,1,1,1,1,3,3,3,0,2,4,2,2,4,4,2,4,4,0,4,2,2,2,1,3,1,3,1,2,3,2,1,3,3,3,3,1,4,4,3,3,1,3,3,1,2,2,3,1,3,3,4,3,2,1,2,1,1,1,1,2,3,3,3,2,3,3,2,2,2,2,2,2,0,2,2,2,2,2,2,0,0,4,4,2,2,4,2,2,4,2,2,2,4,4,2,4,2,2,4,1,1,3,1,1,2,2,3,3,4,1,3,3,3,3,0,3,2,1,3,0,1,2,4,2,2,1,3,2,1,2,0,4,4,0,3,1,3,2,0,3,2,3,2,3,4,3,1,1,1,3,1,3,1,3,1,2,1,3,3,3,1,1,2,2,3,1,4,3,3,3,4,0,1,0,3,3,2,1,1,3,2,3,2,2,3,1,2,4,3,3,1,0,1,3,1,1,1,3,2,1,1,3,0,1,1,3,1,1,1,2,3,3,0,4,4,1,1,3,2,1,3,4,2,4,0,0,3,0,1,3,2,2,2,2,2,0,2,2,1,1,1,1,0,4,4,3,3,1,3,3,1,4,0,0,3,1,1,4,4,2,2,2,2,2,3,2,2,0,2,2,2,2,2,4,1,4,2,0,0,3,2,2,1,3,2,2,2,2,4,2,2,2,2,2,3,1,2,2,2,2,2,0,2,2,2,1,2,2,4,2,3,2,2,0,2,1,2,2,2,2,2,2,2,2,2,3,2,2,2,2,2,2,2,2,2,2,2,2,2,2,0,2,2,2,2,2,2,2,2,4,0,0,4,2,2,4,2,2,2,2,2,2,1,3,2,2,2,2,2,2,2,3,3,3,0,4,2,2,2,2,2,2,2,4,0,0,2,0,1,1,3,0,3,1,2,3,2,3,0,4,1,1,3,1,1,3,1,0,2,3,2,2,1,3,1,2,3,3,1,0,2,3,2,3,2,3,1,3,2,3,1,3,1,1,1,1,1,3,1,3,3,3,3,1,3,3,4,3,3,1,2,1,0,1,3,2,2,4,3,0,3,3,3,3,4,3,2,1,1,4,2,1,0,2,2,3,3,3,2,4,0,3,1,3,3,2,1,2,0,3,3,4,3,2,2,0,4,2,4,3,3,0,4,3,3,3,1,0,2,0,1,0,1,4,4,2,3,2,2,4,0,0,3,3,1,0,4,1,3,4,2,2,2,2,1,1,1,3,0,1,4,0,4,4,0,0,0,4,0,0,0,4,0,3,4,0,0,0,4,0,4,0,4,4,0,4,4,4,1,0,0,4,0,4,1,0,0,1,4,3,3,0,2,0,2,2,2,2,3,1,4,1,2,3,2,3,0,1,1,0,4,2,2,2,0,0,2,2,2,2,4,2,0,2,2,2,0,2,0,0,2,2,2,2,2,2,3,1,1,4,2,1,3,3,2,3,2,4,4,4,1,1,1,2,0,0,3,2,1,0,0,4,2,3,3,3,2,2,4,3,3,4,1,3,4,1,2,3,3,0,0,1,3,4,1,1,2,4,1,3,3,1,0,3,4,4,4,3,2,1,2,2,2,1,3,1,1,1,4,1,3,3,4,0,2,1,3,1,0,4,3,3,3,2,1,1,3,4,0,3,1,1,3,3,4,2,2,2,0,4,4,0,2,2,0,0,2,4,0,0,2,2,2,2,0,2,0,0,2,0,0,2,0,2,0,2,4,2,4,4,2,2,2,0,2,2,0,0,4,2,3,2,0,1,3,1,3,3,4,3,3,3,3,4,1,4,1,3,1,3,2,1,1,4,1,2,3,3,0,3,3,3,2,1,0,1,1,1,3,2,3,2,1,1,1,2,4,2,3,1,2,3,1,1,3,1,1,3,1,0,3,1,3,1,4,4,4,3,1,0,1,0,4,1,2,3,3,1,1,4,4,1,1,4,3,3,3,3,1,2,3,4,4,3,4,3,1,1,1,3,0,1,3,3,4,1,4,3,3,4,3,1,1,0,1,1,0,3,1,2,0,1,0,0,1,3,4,0,4,0,3,2,2,2,1,3,1,2,2,3,2,4,0,4,3,0,0,0,3,4,4,3,0,2,2,4,3,1,2,2,1,1,2,2,2,0,3,2,0,0,3,2,2,1,2,2,2,3,2,2,2,2,2,4,2,2,2,1,3,2,2,2,1,1,1,3,1,2,2,2,2,2,2,2,2,0,4,2,1,0,3,1,3,1,1,3,1,3,1,1,1,3,3,3,3,3,4,2,1,3,1,3,1,1,1,3,1,2,0,4,4,0,4,4,0,4,1,1,1,0,1,3,3,3,3,3,2,2,2,2,3,1,3,2,2,1,3,1,2,1,4,3,4,1,0,0,0,4,4,0,0,0,2,1,4,1,4,0,3,4,2,0,2,4,2,4,2,2,2,0,1,2,0,0,0,4,4,4,2,1,1,2,3,0,1,3,2,3,3,4,4,4,4,4,3,0,3,4,4,3,1,4,3,0,1,0,1,1,3,3,1,0,3,3,4,3,1,4,3,1,0,1,1,0,1,3,0,1,1,1,1,0,4,0,0,3,3,4,1,4,1,3,1,1,1,2,4,0,4,4,4,4,4,4,0,1,4,4,2,4,2,0,2,4,4,4,2,0,0,4,1,0,3,2,1,1,4,4,3,2,4,3,0,3,4,2,3,1,4,0,0,3,0,0,4,1,1,1,4,1,1,0,0,0,4,4,4,0,2,1,1,4,1,4,0,3,3,0,1,0,0,0,1,0,2,0,0,0,0,1,1,0,4,0,0,1,4,0,1,3,3,4,3,1,3,3,3,3,0,1,4,3,0,3,4,1,1,3,0,4,4,0,2,3,3,1,1,2,1,1,4,0,3,0,3,1,3,3,3,2,4,0,0,3,4,0,2,0,3,0,2,3,4,3,3,3,2,3,1,1,2,3,1,1,2,1,1,1,3,3,3,1,1,0,3,4,3,1,1,1,1,0,4,3,3,1,1,0,1,0,3,0,1,2,2,1,0,0,4,3,1,2,3,2,1,1,3,3,3,1,3,3,4,3,3,2,3,1,3,1,2,2,1,3,1,2,3,2,1,3,3,2,1,1,2,1,2,2,2,2,3,2,1,2,1,2,2,3,1,2,1,1,3,3,2,3,2,2,3,1,3,2,2,3,3,3,1,1,2,1,3,1,1,2,2,2,2,1,2,3,2,3,3,3,2,2,1,2,1,3,3,2,2,1,3,4,3,4,1,3,2,2,2,0,1,2,2,3,1,3,4,4,3,0,1,3,4,0,0,0,2,4,0,2,0,2,2,2,1,2,1,2,1,3,1,0,4,0,2,3,1,2,2,2,0,2,2,2,2,2,2,2,0,1,1,3,0,0,2,4,2,4,4,0,3,1,2,2,2,3,2,3,2,3,2,2,1,2,2,1,3,1,3,3,4,2,0,3,3,1,1,0,1,3,2,0,4,1,2,2,1,3,1,3,3,1,2,0,1,3,1,2,1,2,3,1,3,1,1,2,1,2,1,3,2,2,2,2,2,2,3,3,0,1,3,1,0,3,1,1,3,0,0,2,2,2,3,2,0,4,4,0,0,0,1,2,0,3,2,3,1,2,3,4,2,0,3,2,1,4,3,0,4,3,1,1,4,1,3,4,1,1,4,3,1,3,1,1,2,1,3,3,3,1,2,4,3,2,3,0,1,2,3,3,1,3,1,1,2,0,0,1,1,2,3,1,1,4,2,1,1,2,2,0,2,2,4,2,1,2,3,3,1,2,3,2,2,1,1,2,2,3,4,2,2,2,2,2,2,2,1,3,3,1,3,1,2,3,1,3,3,1,1,3,1,1,2,2,1,2,0,1,3,3,2,1,1,1,4,2,2,2,2,0,2,3,2,1,3,3,1,2,1,2,1,3,2,4,0,3,4,1,2,1,2,4,3,1,2,1,1,1,1,2,3,1,3,1,1,2,2,4,0,0,3,2,3,1,3,0,3,3,2,0,3,4,0,3,4,2,2,1,2,2,3,3,0,2,3,2,4,0,0,4,2,0,2,4,2,2,1,1,1,1,2,1,2,1,2,2,2,2,2,2,2,2,2,2,2,2,2,0,1,0,2,1,1,1,4,3,4,2,2,2,3,1,3,2,3,3,2,2,2,2,2,2,2,2,2,2,2,2,2,2,2,2,2,4,2,0,1,2,4,2,2,2,2,4,2,1,1,2,4,3,2,2,2,0,1,2,2,4,1,3,1,0,0,1,1,0,3,3,1,1,0,1,3,4,3,2,1,2,2,3,3,2,2,1,4,1,1,1,3,2,2,1,2,2,3,2,3,2,2,2,2,3,1,3,3,2,0,3,0,3,3,2,2,3,2,2,0,3,2,3,1,2,2,1,2,3,2,3,3,4,4,2,1,2,2,2,2,0,3,2,3,3,0,2,3,1,3,1,1,2,1,0,4,0,1,2,1,4,0,2,0,1,2,3,4,0,1,0,1,4,0,3,3,3,1,0,0,0,1,0,1,2,1,3,3,1,1,3,2,2,3,2,3,2,2,2,2,3,4,1,0,3,1,1,1,1,3,0,2,3,0,4,1,4,0,2,1,0,0,0,4,2,2,3,0,1,4,4,1,0,4,2,1,1,2,0,4,4,4,0,2,2,0,2,2,4,2,0,1,2,2,3,0,4,2,0,2,2,1,2,0,4,2,1,2,4,2,0,2,4,2,0,2,0,2,2,2,2,2,0,3,0,4,2,4,4,2,4,2,1,2,2,2,0,2,0,2,2,0,2,2,3,2,4,2,2,4,4,2,4,4,2,2,2,0,4,2,2,0,2,0,2,2,2,0,0,2,2,0,4,2,0,0,4,2,4,4,2,2,2,4,4,4,2,4,0,0,4,0,2,2,0,4,2,4,2,2,4,2,0,4,2,2,3,4,2,0,2,4,0,2,0,4,4,1,4,0,2,0,0,0,4,0,2,0,0,2,0,0,2,0,4,2,2,4,2,2,2,4,4,4,4,1,0,0,0,4,0,0,2,4,0,1,3,1,0,2,1,1,3,4,4,4,1,1,3,3,3,3,2,3,3,3,4,1,0,0,0,2,1,3,0,1,2,3,2,1,3,3,3,3,0,1,4,1,3,4,3,1,0,4,0,0,0,1,3,1,3,1,3,1,4,4,1,4,3,0,0,0,1,3,3,3,4,0,1,0,1,3,4,3,3,3,4,4,4,1,3,4,0,1,1,4,3,0,0,0,1,1,4,1,4,4,0,1,3,3,0,1,0,3,4,4,1,3,3,3,0,1,0,1,3,0,3,4,4,0,0,1,4,1,4,3,0,1,3,3,1,4,1,1,1,3,0,1,1,3,3,3,3,4,4,2,1,0,0,1,3,1,1,2,0,3,0,3,4,0,0,0,3,1,3,3,4,3,1,3,4,0,0,0,3,0,1,3,4,1,3,3,0,1,4,3,3,4,0,1,3,3,3,1,3,1,1,3,3,1,3,3,1,3,1,3,4,3,3,0,3,1,3,0,4,1,0,4,3,3,3,4,4,1,3,1,4,1,0,3,3,3,3,4,3,1,3,3,3,3,1,2,0,2,3,1,3,3,1,3,4,1,1,1,1,3,3,1,4,0,3,3,4,3,3,1,3,1,3,3,0,4,1,0,1,0,3,0,2,3,3,1,4,1,1,3,4,1,1,0,4,3,3,3,4,1,3,4,0,3,3,1,3,4,1,0,1,3,3,3,3,3,1,1,3,3,3,1,0,1,0,3,3,4,3,1,3,4,1,1,3,1,1,3,0,1,3,0,1,1,0,1,4,3,1,0,3,0,0,4,0,3,4,3,0,0,1,3,3,0,3,1,0,4,3,0,3,1,3,3,1,3,1,3,3,3,3,0,1,3,4,1,3,4,0,1,3,1,1,1,1,3,3,1,1,1,0,3,4,3,3,3,3,4,1,4,1,0,1,1,4,1,0,0,1,0,3,3,2,2,3,4,0,0,4,3,2,2,2,2,4,4,2,4,2,2,0,2,2,2,4,0,4,2,2,2,1,0,1,0,0,0,3,1,1,1,1,1,2,0,2,1,3,3,4,4,4,0,4,4,0,1,1,4,1,3,2,3,4,4,1,1,1,3,1,2,1,3,3,2,3,3,1,2,4,2,0,4,0,3,1,4,4,4,1,4,0,4,2,4,0,3,1,0,3,3,0,0,0,1,1,3,0,3,4,1,3,4,0,4,0,1,4,3,2,0,1,0,1,4,0,0,3,3,1,1,1,3,1,2,3,3,4,4,2,3,2,2,2,2,2,4,4,3,4,1,3,1,1,2,4,4,3,3,3,3,0,3,3,2,3,3,1,3,1,1,3,1,4,0,3,0,1,1,3,3,1,2,2,1,3,1,4,3,1,3,4,3,2,1,2,2,3,3,1,2,1,2,4,0,1,3,1,1,3,1,1,3,4,3,1,0,4,3,0,3,4,3,1,0,4,1,3,3,4,0,1,4,2,2,3,1,2,3,1,0,4,1,1,0,0,3,3,0,3,0,1,1,1,0,3,3,3,4,4,3,0,1,4,2,3,1,1,2,4,4,1,4,0,3,0,0,0,3,1,1,2,1,0,4,3,4,3,3,2,3,0,4,4,1,0,1,1,1,0,4,2,4,0,1,0,3,0,3,4,2,0,1,2,4,0,4,4,2,3,2,1,2,0,2,0,2,2,0,2,0,2,0,2,1,4,2,0,2,2,2,2,0,4,4,2,4,2,2,0,4,2,2,2,0,2,2,0,2,2,2,0,0,2,0,4,2,4,4,2,0,2,2,3,4,2,2,3,2,2,2,0,2,1,3,2,3,0,2,0,0,1,2,1,0,1,1,0,1,3,4,1,0,0,0,4,1,1,3,1,3,3,3,4,0,3,1,0,4,4,1,1,3,2,4,4,1,4,4,3,2,1,0,1,1,2,1,1,2,2,2,4,0,2,2,0,0,4,4,0,0,0,4,1,0,3,3,2,4,4,0,3,1,3,4,3,0,1,3,1,1,3,1,3,1,3,1,3,0,0,1,4,0,3,4,1,1,3,1,2,1,3,4,1,3,0,1,4,1,3,3,1,0,1,1,3,3,0,4,0,4,4,1,1,3,3,0,3,0,3,4,0,4,1,2,3,0,4,4,1,0,1,4,0,1,1,0,3,2,4,3,3,3,4,1,0,0,3,4,4,1,3,3,1,1,3,3,4,0,1,4,4,1,1,3,1,0,3,1,3,4,4,3,3,0,3,4,0,4,4,3,4,3,3,4,3,1,3,1,1,1,1,1,0,4,3,3,1,4,3,4,1,3,0,1,1,1,1,1,3,3,3,1,3,3,0,1,4,1,3,1,1,1,2,3,1,3,1,1,1,3,3,2,1,3,2,1,3,1,3,3,3,1,3,3,2,3,1,1,2,2,4,4,0,1,4,1,0,1,3,0,0,4,2,0,2,1,1,0,0,3,0,1,4,4,4,0,4,3,4,2,4,2,0,0,2,2,2,2,0,2,3,1,4,0,4,0,4,4,0,4,0,4,4,0,3,4,4,4,0,4,4,4,0,0,0,0,4,4,4,1,3,1,0,1,0,1,0,0,2,0,4,3,0,3,4,4,0,0,0,0,0,0,2,3,1,3,2,4,1,0,0,1,2,0,3,1,3,2,1,4,2,3,2,3,2,1,4,1,1,0,4,0,1,0,1,4,1,2,4,4,1,1,3,1,0,1,2,4,4,0,2,0,0,3,1,0,3,3,1,2,4,1,0,4,4,4,4,0,0,0,3,0,4,4,0,0,3,4,4,0,1,0,2,0,0,1,4,4,1,4,4,0,2,0,4,1,3,0,1,3,4,2,1,4,1,4,4,2,1,4,1,0,1,4,4,2,3,0,4,3,2,0,0,4,0,1,1,3,4,0,1,4,3,1,3,1,3,0,3,1,1,0,2,3,1,2,2,4,1,3,3,1,0,0,4,1,1,1,4,3,0,0,4,3,0,0,4,4,1,0,1,4,4,4,1,0,4,4,3,3,0,2,0,0,4,3,4,3,2,0,2,2,2,2,1,3,1,4,0,4,2,0,1,4,3,2,4,1,0,4,0,3,0,2,0,1,1,3,3,3,2,2,3,3,2,2,1,3,2,3,3,2,1,2,2,2,4,3,2,0,3,1,3,3,4,2,4,1,1,0,2,3,3,0,0,4,3,4,3,3,3,3,4,1,3,0,1,2,3,2,2,2,4,0,4,4,4,2,2,2,2,2,4,1,0,4,1,0,2,2,4,1,0,1,3,4,1,3,4,3,3,1,3,0,1,0,2,1,1,3,3,1,4,3,2,2,4,0,1,2,2,1,1,4,1,1,1,3,1,4,3,3,1,3,1,0,4,3,2,3,1,2,1,1,1,1,3,3,3,2,2,2,1,1,1,4,1,1,1,2,1,2,3,3,0,4,4,4,3,4,4,3,1,3,1,3,4,1,2,0,0,4,1,1,2,1,4,1,3,0,2,1,3,3,1,3,1,4,2,0,2,2,1,0,2,4,3,2,2,0,3,2,1,2,3,3,4,2,4,2,1,3,1,1,3,3,3,1,3,1,1,1,1,2,2,3,0,1,2,1,1,3,4,2,0,4,3,0,0,1,4,4,1,4,0,2,4,0,1,3,2,2,4,1,1,0,1,1,1,2,0,1,2,3,3,3,2,3,3,2,2,3,2,2,2,3,0,4,1,0,3,2,4,1,3,2,2,0,1,1,3,3,1,3,2,1,0,0,2,4,1,1,4,0,3,3,1,0,1,1,1,1,0,3,1,3,3,4,4,4,4,4,0,4,1,1,3,4,3,2,2,2,4,2,4,2,4,2,2,4,2,3,0,1,0,3,4,2,1,2,3,2,1,4,4,3,1,0,1,1,0,4,4,2,4,2,3,3,2,4,0,4,1,4,1,4,2,2,1,2,3,4,1,1,0,1,3,2,2,2,4,4,1,4,3,0,4,3,2,4,3,1,3,0,0,3,4,3,3,2,3,3,1,4,1,0,1,0,3,4,4,0,4,1,1,4,2,1,3,3,3,4,1,2,1,2,2,4,1,2,1,3,3,1,1,3,1,3,2,4,1,3,2,1,1,1,1,1,1,2,3,2,1,3,1,3,2,4,4,2,3,1,3,1,1,3,3,2,1,4,3,3,2,3,3,1,1,1,3,1,4,3,3,3,1,3,1,1,4,3,3,3,3,1,1,3,3,3,4,1,0,3,2,4,3,1,3,2,1,3,1,2,3,1,3,2,1,2,3,1,3,1,2,2,3,2,1,3,3,1,1,2,2,3,1,3,3,1,2,1,3,3,2,1,3,1,3,1,3,4,2,2,1,2,2,1,1,2,2,1,2,3,1,3,3,2,3,2,2,3,4,1,2,2,1,1,1,2,2,0,3,2,2,1,0,1,0,1,4,1,3,2,1,0,3,3,1,0,1,3,3,3,4,1,4,1,3,1,1,4,3,2,3,4,3,4,3,3,4,1,2,3,2,4,4,4,2,4,2,0,4,2,4,2,1,2,2,4,0,2,2,4,2,4,2,4,0,0,2,2,2,0,0,2,2,4,0,2,0,4,0,2,2,0,0,2,2,0,2,2,2,4,2,2,1,2,2,2,4,1,4,0,2,1,3,4,2,2,2,1,2,0,0,3,0,3,0,4,4,4,0,4,4,0,2,0,4,0,4,4,2,2,2,2,0,0,4,0,0,3,2,2,1,3,4,0,3,0,4,4,4,4,0,3,1,4,1,1,1,3,3,4,1,4,4,0,1,3,3,1,2,1,3,0,1,3,4,0,1,1,1,1,3,0,3,0,3,1,3,1,0,1,3,3,4,1,3,3,1,1,3,3,4,1,0,1,3,4,3,4,2,3,0,3,4,2,3,0,4,2,0,2,2,4,2,0,4,2,4,0,2,2,2,2,4,0,0,0,2,0,2,0,0,2,2,2,4,4,4,4,2,2,2,1,0,1,3,4,1,3,1,4,1,4,3,1,4,0,3,2,0,1,2,2,1,1,3,4,1,4,0,4,2,1,0,2,3,3,1,4,1,1,3,2,3,3,0,0,3,3,4,1,1,2,2,3,1,1,2,0,1,1,3,3,1,1,2,3,3,0,1,1,2,2,1,2,3,4,3,2,4,2,2,2,1,2,4,1,2,1,3,1,3,4,2,3,1,4,2,4,2,1,0,1,3,3,4,1,2,2,0,3,0,4,2,0,4,1,1,1,4,1,0,0,3,1,3,2,2,3,3,3,4,4,4,3,3,2,1,1,4,1,2,4,2,2,2,1,1,2,2,4,1,2,1,4,0,4,2,4,4,2,4,0,0,3,4,1,1,1,0,0,1,3,0,1,4,1,1,1,3,3,4,4,0,1,1,1,1,3,3,4,4,3,0,1,2,1,1,3,3,1,3,3,1,3,3,2,3,1,0,2,1,1,1,1,3,2,3,3,3,3,2,3,3,3,1,1,1,1,3,2,1,1,1,3,2,1,3,1,2,2,3,1,1,2,3,4,3,4,2,3,1,1,0,1,0,2,1,3,1,2,1,4,2,2,2,2,1,3,3,4,1,0,2,3,2,2,2,2,2,2,3,0,0,3,3,0,1,1,3,1,3,3,1,2,3,1,2,2,3,3,3,1,2,3,1,4,3,3,2,1,2,2,2,2,2,2,2,2,3,2,2,2,2,2,2,2,2,4,2,2,2,1,2,2,2,2,2,2,2,2,2,2,2,2,2,2,2,0,2,1,2,1,2,2,2,2,2,2,1,1,2,2,2,2,2,2,2,2,2,2,3,2,2,2,2,2,2,2,2,2,2,2,2,2,2,2,2,2,2,2,2,2,2,2,2,2,2,2,2,2,2,0,2,2,2,2,2,2,2,2,2,2,2,1,2,2,2,2,2,3,2,2,2,1,2,3,2,2,2,2,0,0,0,0,1,0,0,2,2,2,2,2,4,2,2,2,0,2,4,2,3,0,1,3,2,3,0,2,0,3,0,4,2,2,2,2,3,2,0,1,1,2,0,1,4,3,2,1,3,2,2,4,0,1,2,4,2,2,1,2,1,3,1,3,0,4,4,0,4,3,1,0,4,1,0,1,3,2,4,1,3,1,3,1,0,1,2,1,2,0,3,0,1,1,0,3,2,1,3,2,3,1,4,1,3,2,3,0,3,2,1,0,3,3,2,3,2,2,3,2,0,3,0,0,0,1,1,4,0,2,0,2,1,0,2,4,2,2,2,2,2,2,3,4,4,2,3,1,3,0,1,0,2,3,0,0,3,3,1,1,3,2,1,2,4,4,3,0,2,4,2,0,1,0,4,0,0,3,0,2,2,1,0,1,0,3,4,1,2,3,1,4,3,2,4,3,4,2,0,1,1,2,1,4,2,0,0,3,3,3,0,2,2,2,4,0,0,3,4,0,1,1,4,1,1,0,0,1,1,4,2,4,4,4,3,0,1,1,2,1,1,3,3,1,1,1,2,4,1,3,1,1,2,2,0,4,3,3,3,1,4,4,1,4,2,2,4,4,0,0,4,4,2,0,4,2,2,0,0,2,0,0,2,4,0,0,2,2,2,2,1,3,1,1,1,3,0,1,0,1,1,3,3,3,0,1,3,4,3,3,4,1,1,4,4,1,0,3,3,4,4,0,1,0,1,0,1,4,4,1,4,4,3,0,4,1,4,1,1,3,4,3,1,4,1,2,4,0,4,0,2,1,0,0,3,3,1,3,1,1,0,4,0,4,0,3,4,0,3,3,3,1,0,4,2,4,4,0,0,0,0,4,4,0,0,4,0,4,0,0,0,0,0,0,4,0,0,1,3,1,1,3,3,0,0,2,3,3,2,3,3,2,1,3,0,3,3,1,1,0,3,1,1,3,0,0,2,0,1,2,2,2,2,0,1,4,2,2,2,1,0,0,2,4,1,3,0,0,2,2,4,2,2,1,0,1,3,0,1,3,4,4,1,1,0,3,3,3,4,4,0,0,4,4,0,0,0,4,4,0,0,4,3,3,0,0,3,3,2,2,3,1,3,2,4,0,2,2,0,2,2,1,0,3,0,0,2,0,1,1,4,2,3,2,4,4,2,1,2,0,0,0,0,0,0,4,0,4,2,2,2,4,0,0,2,2,4,2,2,2,0,4,0,0,0,0,2,4,1,1,2,0,0,0,2,4,0,2,4,0,2,0,2,4,4,0,0,0,4,0,0,2,4,2,4,2,2,4,3,1,4,0,0,2,3,1,3,2,1,1,0,0,2,0,2,3,1,0,1,4,4,2,1,0,2,3,4,2,1,4,3,2,1,4,1,2,1,1,0,3,2,1,3,3,1,3,1,3,4,3,3,1,1,3,3,1,0,3,2,1,3,3,3,1,3,3,2,4,3,4,0,0,2,3,4,3,3,1,3,2,1,2,4,1,3,4,1,4,3,1,3,3,3,4,2,4,1,1,3,4,3,0,4,0,3,4,4,3,4,4,0,0,2,1,3,3,1,3,3,0,1,3,2,4,0,3,3,0,3,2,2,2,1,2,2,3,1,1,3,4,4,3,1,1,3,2,3,2,2,4,2,2,0,4,2,2,2,4,2,4,1,3,3,2,3,3,3,0,4,2,1,3,0,4,0,1,1,2,2,3,2,4,3,2,2,2,1,1,1,3,2,2,1,3,3,1,0,3,3,4,2,0,2,0,0,0,1,1,3,0,3,3,2,4,4,1,4,0,4,0,2,2,2,0,2,4,4,2,4,2,0,0,3,1,3,1,1,4,1,3,0,2,0,4,3,3,3,3,4,1,0,4,4,0,1,3,1,1,1,2,3,3,4,3,4,0,1,4,4,4,1,2,2,2,2,3,2,1,1,4,4,2,2,2,1,3,1,3,1,3,1,4,1,2,3,1,2,0,3,1,1,3,4,0,1,2,3,4,2,2,1,3,0,0,4,1,3,4,3,4,2,2,4,2,1,1,2,2,4,0,3,4,3,2,3,0,1,3,4,1,4,1,0,1,1,3,3,2,3,2,2,3,3,1,2,1,4,2,2,3,1,0,0,3,1,0,4,4,3,1,2,4,3,3,4,2,2,2,0,1,3,3,1,4,3,0,3,1,1,2,1,1,2,4,1,2,4,0,2,1,4,3,0,3,3,1,1,3,0,2,1,0,0,0,0,3,1,3,3,1,1,4,0,2,1,3,4,1,3,3,2,3,2,1,2,2,2,1,3,3,1,3,3,3,1,2,2,2,3,3,3,0,3,2,4,1,1,3,1,1,1,2,1,4,1,0,1,1,3,0,3,4,1,2,1,1,3,2,2,0,4,1,3,1,0,4,3,1,1,1,1,2,3,1,4,3,4,0,3,2,3,0,3,3,1,1,0,2,1,2,1,1,1,3,1,1,1,4,3,1,1,2,1,2,3,1,1,0,3,4,0,2,3,0,1,0,2,1,4,1,4,3,1,3,4,0,0,2,2,3,3,3,2,0,1,1,4,1,3,1,4,3,4,3,2,2,4,4,3,1,4,3,3,3,2,4,3,2,2,1,1,2,1,0,1,4,0,2,3,3,4,3,2,1,1,3,3,1,0,1,3,4,4,2,2,1,4,4,1,3,3,3,0,0,3,1,4,3,3,1,3,3,1,1,3,1,0,4,1,0,4,1,1,4,3,1,4,3,4,3,3,0,1,4,0,1,4,3,3,2,3,4,1,0,4,2,1,3,1,4,1,2,1,2,1,2,2,1,1,4,3,1,4,1,2,2,0,2,1,0,0,4,0,3,0,1,3,4,4,2,4,1,3,1,4,1,0,0,4,1,0,0,4,0,0,0,1,1,4,2,0,3,0,1,4,0,0,3,0,2,3,1,1,4,2,0,4,4,0,0,0,1,0,4,4,4,4,3,1,4,4,0,2,0,3,1,1,1,4,1,1,1,3,3,0,0,4,4,1,3,3,1,2,3,3,1,3,1,3,1,1,1,1,0,0,4,1,1,1,1,1,3,1,3,3,3,1,1,3,1,1,3,3,3,1,1,1,1,3,3,1,3,3,3,0,4,1,0,1,4,3,4,3,1,2,3,2,0,3,4,4,1,3,3,3,3,1,4,3,4,1,3,0,2,2,3,3,1,1,2,2,0,2,3,2,2,2,2,2,2,2,2,2,2,3,1,1,1,2,1,3,2,2,3,3,1,1,1,3,3,2,3,3,2,1,3,1,1,3,1,3,1,3,1,3,1,3,3,1,1,2,2,2,2,3,1,2,0,0,3,2,3,1,0,0,4,0,0,4,4,4,4,4,4,4,0,0,0,0,4,4,0,4,4,2,4,0,1,3,1,1,2,1,2,2,4,2,2,1,2,2,2,1,1,3,2,2,4,1,3,2,2,2,2,2,2,3,2,2,1,2,1,2,4,2,1,2,1,1,3,1,1,4,1,1,3,3,3,3,2,1,3,1,1,1,1,1,2,0,1,3,1,2,3,3,3,3,3,1,2,3,3,3,1,1,3,1,1,1,3,2,0,3,0,4,1,1,1,2,3,1,3,3,2,4,4,4,1,1,3,3,2,3,4,3,3,3,1,2,3,1,1,1,3,3,3,3,3,1,0,3,1,3,3,3,1,3,1,3,3,2,1,1,4,3,3,3,1,1,3,1,1,1,1,1,4,1,4,3,1,1,1,1,0,4,4,4,1,3,1,1,1,4,1,3,1,0,3,1,3,1,3,3,1,3,1,3,4,1,1,3,1,3,3,1,3,3,1,0,2,3,1,3,1,3,1,2,1,1,1,3,3,3,0,2,2,1,1,1,1,3,2,0,1,1,4,4,3,1,4,1,1,3,4,4,0,3,3,4,3,0,3,4,4,0,0,0,4,0,0,1,4,0,3,1,0,4,3,0,0,0,0,1,0,0,4,2,3,0,0,0,2,0,0,1,3,4,2,1,3,2,2,2,1,2,0,2,4,4,0,2,4,3,1,2,1,1,2,3,2,0,2,3,0,3,0,4,1,4,0,3,0,4,2,4,3,2,0,2,1,3,1,1,2,4,0,3,1,0,3,0,3,0,1,3,0,1,1,1,2,1,1,3,2,3,4,2,0,2,2,2,4,0,2,4,0,4,0,3,3,2,3,2,1,3,2,2,1,2,3,4,1,3,3,3,3,3,1,1,1,2,1,2,1,0,3,2,4,2,4,4,1,1,0,0,3,0,4,1,2,3,3,3,4,1,1,0,2,1,3,3,1,4,2,3,3,3,3,1,2,1,2,0,4,3,1,1,2,3,4,2,2,1,2,1,0,2,4,4,0,0,3,3,3,3,2,3,0,0,4,2,2,2,4,3,1,3,3,4,2,0,0,0,0,2,4,1,0,3,0,2,4,2,3,1,1,1,1,3,0,3,0,3,4,4,2,4,2,0,1,3,3,2,1,3,4,0,0,1,3,1,1,1,3,1,2,3,2,1,3,3,0,1,3,4,1,1,1,1,3,1,2,3,4,3,3,4,1,3,1,4,0,0,3,3,1,2,4,2,0,1,4,3,3,0,0,2,1,3,3,3,1,1,1,2,3,1,2,3,3,3,1,3,1,1,3,3,2,1,3,1,2,2,4,4,2,2,2,2,1,2,4,2,2,0,4,3,1,1,0,2,1,1,1,0,2,3,4,2,0,1,3,2,4,1,3,1,3,3,3,3,0,4,1,3,1,0,2,1,2,2,3,1,4,3,4,1,1,3,3,4,4,4,1,4,1,3,4,1,3,1,1,1,3,1,1,3,1,3,3,2,2,1,1,3,3,0,3,2,1,1,1,1,2,1,2,2,0,1,3,3,1,3,3,1,1,0,3,1,1,2,2,2,1,3,3,3,2,1,3,2,3,1,3,3,3,3,3,3,1,2,2,2,4,0,2,1,0,1,3,0,2,1,2,1,2,1,2,4,4,3,0,2,3,3,3,1,4,3,3,1,3,1,3,1,1,1,0,4,0,2,4,2,4,2,1,2,4,3,1,3,4,2,2,0,2,0,2,4,0,1,2,0,1,0,2,2,2,3,0,0,0,2,2,3,2,2,2,2,2,2,2,2,3,2,3,2,3,2,2,2,1,2,2,2,2,2,2,3,2,2,2,2,2,2,2,2,2,2,2,2,2,2,2,2,4,1,2,0,4,0,1,3,2,2,2,2,2,2,2,3,2,2,2,0,0,0,2,2,2,2,2,1,2,2,2,2,3,2,2,2,1,2,2,2,2,2,2,2,2,1,1,2,2,2,1,2,2,2,2,0,3,1,1,1,4,2,4,2,2,0,1,2,3,0,4,0,2,2,1,1,2,2,2,2,2,1,4,2,2,4,0,2,2,2,2,1,2,2,2,2,2,2,2,2,2,2,2,2,4,2,2,3,1,1,1,4,0,0,3,4,1,1,2,1,3,2,3,4,4,1,0,4,4,3,4,3,3,0,3,0,4,1,4,1,0,0,0,1,1,1,3,4,1,4,0,0,0,4,4,1,3,1,1,1,4,3,0,0,0,3,2,4,0,4,4,4,2,0,4,4,4,1,4,4,1,2,4,4,1,2,0,4,4,0,4,0,0,4,0,4,3,0,1,2,4,4,4,3,4,0,0,3,0,4,1,4,3,2,0,2,3,1,1,1,1,3,2,1,1,1,2,4,3,0,3,0,4,1,3,1,2,2,0,2,2,0,4,4,0,4,0,1,4,2,1,0,4,2,4,4,0,1,0,0,3,3,4,3,0,3,4,2,1,1,4,1,2,0,3,4,4,3,1,0,3,4,4,4,4,0,1,3,3,3,0,4,3,2,3,2,2,2,4,0,1,4,0,0,0,4,4,0,0,4,0,0,0,1,3,2,3,3,4,0,1,3,4,3,2,3,4,2,2,4,0,3,1,1,4,0,4,2,2,3,4,1,3,1,1,1,3,1,0,3,2,4,2,0,1,3,3,3,1,3,0,4,1,1,1,0,1,4,4,0,3,1,0,2,2,1,1,3,1,1,4,3,3,4,1,3,1,3,1,0,0,1,0,4,4,3,0,3,3,1,1,3,2,4,0,2,0,0,4,0,2,3,3,4,1,2,3,0,0,0,3,4,1,3,4,0,3,0,3,0,2,3,2,0,0,3,3,4,3,2,0,0,3,4,4,3,3,2,0,2,3,3,3,3,0,3,2,4,2,0,1,1,0,3,1,3,1,4,3,0,4,0,0,3,1,4,0,0,1,3,1,3,4,1,3,1,4,0,2,1,4,2,1,4,4,4,3,1,4,2,0,1,3,4,0,3,3,3,3,0,0,1,3,4,1,1,2,1,1,0,0,1,0,2,2,3,0,0,0,1,4,3,2,4,2,2,0,2,1,0,4,4,2,0,4,3,2,0,0,0,2,3,0,0,4,0,0,1,3,1,4,4,4,3,3,4,1,3,1,2,1,1,4,0,3,3,3,4,1,2,3,3,3,4,3,1,2,2,3,4,1,2,4,3,2,2,1,1,2,1,1,2,3,1,2,1,4,3,4,4,0,0,1,4,1,1,3,3,1,2,2,3,0,2,1,1,1,1,1,1,3,3,3,3,3,1,3,3,3,2,4,1,1,3,3,1,3,1,3,2,0,1,2,1,1,1,1,3,1,4,4,1,1,1,4,3,2,3,2,2,2,4,2,1,3,1,1,1,1,3,1,1,1,3,1,1,3,2,1,4,1,4,1,3,1,3,1,3,1,1,3,3,3,3,1,3,0,1,3,3,0,4,0,3,2,2,3,4,3,3,1,2,1,2,2,1,3,4,1,1,0,1,0,0,2,4,4,1,2,2,2,3,1,1,3,2,2,1,0,3,3,1,3,1,3,3,1,2,3,2,2,4,4,1,2,4,3,2,0,3,2,3,2,1,1,1,3,1,0,3,0,1,2,2,2,2,2,2,1,2,2,1,1,3,1,1,3,3,3,1,1,2,1,2,1,4,2,2,3,3,4,0,0,3,1,1,2,1,1,1,0,3,3,3,1,4,2,3,0,2,2,1,4,0,3,0,3,1,2,1,4,4,3,1,0,0,1,4,0,0,0,3,1,3,1,1,3,4,3,0,4,1,4,0,4,2,3,4,2,2,0,1,1,1,0,0,0,4,4,3,2,0,3,1,3,1,2,3,1,4,2,3,3,3,4,1,4,3,1,0,3,2,2,2,4,0,4,1,4,2,1,0,3,3,1,3,4,3,0,4,1,2,0,1,4,2,3,2,3,4,0,2,0,2,0,2,2,1,3,4,0,1,1,4,4,3,4,1,1,0,2,2,0,2,4,3,4,4,3,1,3,0,3,0,2,3,0,4,3,1,4,3,1,1,0,4,1,1,0,1,0,0,3,3,1,1,4,4,3,0,4,3,3,3,1,4,3,4,3,1,1,4,0,2,0,0,0,3,1,1,1,3,3,3,2,1,2,2,3,0,1,1,2,1,3
B11,1,1,1,4,2,0,2,2,3,3,3,3,3,0,0,1,3,0,2,4,4,2,3,0,0,4,2,1,4,4,0,0,4,3,3,1,3,0,4,0,0,4,0,1,0,0,3,1,2,4,1,2,2,2,3,2,0,1,0,4,3,1,2,0,4,1,0,0,2,2,2,4,4,0,2,2,1,2,0,0,3,0,1,1,2,2,2,2,4,2,2,2,2,4,2,4,2,2,2,4,2,0,4,2,2,2,0,2,2,2,2,4,0,2,4,0,2,2,0,0,2,0,2,2,4,1,3,2,3,3,1,3,2,1,2,1,2,1,2,1,3,1,1,2,3,1,2,3,1,2,3,1,2,2,3,2,2,1,2,1,4,3,1,3,2,2,2,2,2,0,0,0,4,2,3,2,3,3,1,1,1,4,0,4,0,3,2,1,1,3,2,1,2,2,3,1,1,3,2,2,0,4,2,0,0,0,4,3,4,2,0,0,2,4,2,2,2,2,0,2,2,2,4,2,4,0,0,0,0,0,4,2,2,4,2,4,3,4,4,4,4,3,1,1,0,1,2,0,2,1,1,0,4,2,3,2,0,1,2,2,3,1,3,3,3,1,4,4,4,0,4,4,3,1,3,4,2,3,1,2,3,1,1,4,3,3,4,1,4,1,0,2,3,3,1,1,3,2,2,0,0,0,1,2,1,0,3,3,4,3,4,1,4,4,3,1,1,0,1,1,3,4,2,1,1,1,3,2,4,2,2,1,2,2,3,1,3,1,3,3,1,2,3,3,3,3,1,2,4,2,3,3,1,2,3,1,1,3,0,2,1,2,3,2,1,3,1,3,1,3,3,0,2,2,4,3,0,1,3,3,1,2,3,2,3,2,1,1,1,2,1,4,1,1,2,1,1,3,0,2,2,4,0,1,2,2,1,1,3,3,0,1,3,1,1,0,3,4,4,0,0,3,1,2,2,0,3,1,2,1,1,1,3,4,2,3,4,4,2,2,4,0,0,2,2,4,0,3,0,0,0,1,0,3,1,3,1,0,4,1,3,3,4,4,1,0,0,3,1,0,0,4,2,4,2,0,0,0,0,2,1,0,3,0,1,1,0,2,0,0,0,2,1,4,2,4,3,1,1,0,1,1,1,0,4,2,1,0,3,0,2,4,1,3,1,3,1,2,3,3,1,3,2,1,1,1,3,1,2,3,2,2,3,3,4,1,3,2,2,4,3,4,3,0,3,0,2,2,4,2,3,0,3,1,2,0,3,3,3,3,4,1,3,1,1,2,1,2,3,2,3,0,3,2,4,0,0,1,3,1,3,0,3,1,4,3,1,1,1,1,1,0,2,0,4,0,3,2,2,0,0,0,3,2,0,4,1,2,0,4,1,1,0,0,0,1,1,1,3,1,1,0,0,4,3,0,3,1,1,0,2,4,1,4,1,2,0,1,0,2,0,0,3,4,0,1,0,3,4,3,3,0,3,4,2,1,0,1,3,1,2,2,4,2,2,3,3,4,1,1,3,3,2,1,4,0,1,2,1,2,1,4,3,3,0,4,2,4,3,4,1,3,1,1,1,1,3,1,0,1,1,0,0,0,2,4,4,4,0,4,0,4,4,0,2,3,1,2,1,2,0,2,4,4,4,4,4,0,4,4,0,4,0,4,0,0,0,0,0,4,4,4,4,0,4,4,4,4,0,0,4,4,4,4,0,0,4,4,0,4,0,0,4,3,1,4,1,0,1,0,0,4,4,2,3,1,3,1,4,2,0,2,4,4,4,2,1,2,2,3,2,0,4,3,1,1,3,0,2,2,2,3,1,3,1,1,3,1,3,0,4,3,3,2,3,2,1,1,4,0,3,1,2,1,3,3,2,2,2,2,0,2,0,3,0,0,3,1,3,4,4,4,1,2,0,4,1,3,1,2,0,3,3,3,2,2,2,0,0,3,3,4,0,0,2,4,1,1,2,4,0,3,3,3,1,4,2,3,1,4,1,0,1,4,0,2,0,0,3,3,4,3,0,2,0,3,3,3,0,0,1,1,3,1,4,3,3,4,3,1,2,0,4,1,0,2,2,1,3,4,1,3,3,4,0,3,3,2,3,4,1,1,2,2,2,3,1,3,1,3,3,1,1,3,1,3,3,3,3,1,1,2,3,2,1,2,2,2,2,1,3,2,3,3,3,2,2,1,1,3,2,3,2,2,1,3,3,3,3,1,3,1,3,3,2,1,2,1,3,2,2,2,2,1,1,1,4,2,2,3,3,4,0,2,1,1,1,1,3,1,2,0,0,2,2,2,2,0,2,2,1,2,2,2,3,2,2,2,2,2,2,2,1,1,1,0,0,4,3,3,3,4,0,1,2,2,2,2,1,4,2,3,4,3,2,3,3,4,1,3,3,2,1,2,2,3,3,1,0,2,0,1,2,1,3,4,2,2,4,2,3,0,1,4,2,3,3,4,2,3,2,1,1,1,2,2,2,2,4,0,1,3,2,0,3,2,1,0,4,4,1,1,2,3,3,1,3,4,3,2,4,3,0,3,0,1,1,2,4,3,2,0,2,3,3,2,3,1,3,4,3,0,1,1,0,0,2,4,3,2,0,3,3,3,1,4,0,1,3,0,4,0,3,1,3,4,1,2,4,3,1,3,2,3,1,0,3,1,0,3,3,1,1,0,1,3,4,4,3,3,3,1,1,4,4,0,0,1,0,2,1,2,2,2,4,3,0,0,0,1,4,2,2,4,2,2,2,2,4,4,1,0,4,0,4,3,3,3,3,1,3,0,3,3,3,3,0,1,2,4,0,1,0,2,0,0,4,1,3,4,0,3,0,1,4,0,3,2,0,4,1,0,3,1,0,0,0,0,1,0,0,4,1,1,2,0,4,3,0,2,2,0,4,1,1,3,0,0,0,4,3,3,0,4,1,2,2,1,4,1,1,1,2,0,3,4,3,4,3,2,1,0,3,1,4,4,0,3,0,1,0,3,3,1,0,3,0,4,4,1,4,1,0,4,4,0,2,2,1,4,0,2,2,1,2,3,3,2,1,3,3,3,1,1,4,3,4,1,1,2,0,4,0,4,4,1,4,2,0,4,4,3,1,4,4,4,4,0,4,4,3,1,3,3,4,1,0,4,1,3,3,4,0,3,4,0,2,4,4,4,0,4,2,1,4,0,0,0,4,4,0,4,4,3,0,0,4,0,4,0,0,1,0,3,0,0,1,1,0,1,2,2,4,4,3,2,2,4,4,4,4,0,2,2,2,0,4,0,4,3,4,0,1,3,1,0,3,1,3,3,0,3,4,1,4,0,4,0,2,0,1,3,1,3,3,0,1,3,3,0,3,4,0,2,1,2,1,3,4,3,3,4,1,1,2,3,1,1,4,0,3,3,1,1,0,1,0,1,2,2,3,3,3,1,1,3,1,3,0,3,3,2,4,3,4,0,4,1,4,0,1,1,1,0,2,0,4,1,3,1,1,2,2,2,2,2,2,3,3,1,4,1,1,1,2,2,2,2,3,3,1,1,1,1,2,2,3,3,3,2,3,4,2,2,0,1,2,4,2,2,2,0,2,1,2,0,0,2,4,0,0,2,2,3,1,0,1,3,4,4,1,0,3,2,1,4,3,1,3,3,3,3,3,1,1,1,2,1,3,2,1,2,3,1,4,3,3,1,0,1,3,0,3,0,0,2,3,0,1,1,2,3,2,3,2,0,2,4,0,0,0,2,1,2,1,4,0,3,0,4,3,2,2,2,2,4,2,0,3,3,1,4,0,1,0,3,0,4,4,4,2,3,4,1,2,3,0,0,4,1,0,3,0,4,4,0,1,0,0,1,1,2,1,3,0,4,3,2,4,2,2,3,4,4,2,4,2,4,4,3,1,2,3,3,0,1,3,1,1,2,3,3,3,0,2,2,3,2,4,1,0,2,0,3,3,4,3,1,0,3,0,4,2,0,4,4,0,3,3,3,0,2,3,3,0,0,2,2,3,3,4,1,1,2,3,2,0,1,1,3,1,0,0,0,4,1,1,0,1,0,0,3,4,4,3,4,4,0,0,3,0,3,3,2,4,1,1,2,3,1,3,3,4,3,1,3,3,4,2,3,2,3,3,3,3,1,2,3,0,0,4,0,4,1,3,1,3,1,1,1,1,3,1,0,3,4,1,3,2,3,4,3,3,2,2,3,0,1,1,2,2,3,3,1,2,1,4,2,3,3,0,1,1,3,2,0,4,2,3,3,3,0,3,4,4,3,1,3,0,2,2,1,3,0,2,1,0,0,1,1,3,0,2,2,3,1,4,2,1,2,2,1,0,3,2,2,2,2,2,2,2,2,2,2,2,2,4,2,1,3,3,1,2,1,2,1,2,1,1,3,2,3,1,3,1,2,2,2,3,1,1,1,1,2,3,3,3,4,3,3,3,0,4,3,0,0,1,1,4,2,1,2,2,3,2,2,0,0,4,2,0,3,1,0,1,0,1,4,0,0,1,2,2,2,3,0,2,0,1,0,2,1,0,1,1,0,4,2,4,4,4,0,3,4,4,4,4,0,3,4,4,0,4,3,1,4,0,3,3,3,0,3,0,0,1,1,4,0,1,0,4,4,3,1,0,4,0,0,3,4,1,0,3,1,1,3,1,1,3,3,0,0,1,1,2,3,3,3,2,2,2,2,2,2,2,1,3,3,3,3,1,3,1,3,1,1,1,2,3,1,1,3,3,3,2,2,3,2,2,2,0,2,1,2,2,2,1,1,0,1,0,1,0,4,4,1,1,0,0,4,4,4,3,3,4,3,4,4,4,1,3,0,0,0,4,3,3,2,4,2,3,1,1,1,0,4,1,2,3,3,3,4,0,3,0,0,4,2,4,0,2,3,0,1,0,3,2,0,4,1,3,2,0,0,3,2,0,0,4,4,4,0,3,3,3,3,4,0,4,0,0,0,4,3,0,1,4,4,0,3,3,2,4,3,1,1,1,2,3,0,4,0,2,4,2,0,0,3,0,4,3,4,0,4,4,4,4,4,0,3,1,3,1,3,3,1,2,2,0,3,3,3,0,0,0,0,1,3,4,1,4,1,1,4,1,4,4,1,4,0,0,4,3,3,1,3,4,1,1,1,3,2,0,2,4,1,2,3,3,1,1,2,2,2,3,2,1,1,4,2,2,3,2,4,0,4,4,2,2,0,0,3,3,2,2,3,2,3,1,1,3,3,0,4,1,0,0,3,1,1,1,3,3,1,1,1,1,1,1,1,3,3,3,0,2,4,2,2,4,4,2,4,4,0,4,2,2,2,1,3,1,3,1,2,3,2,1,3,3,3,3,1,4,4,3,3,1,3,3,1,2,2,3,1,3,3,4,3,2,2,2,1,1,1,1,2,3,3,3,2,3,3,2,2,2,2,2,2,0,2,2,2,2,2,2,0,0,4,2,2,2,4,2,2,4,2,2,2,4,4,2,4,2,2,4,1,1,3,1,1,2,2,3,3,4,1,3,3,3,3,0,3,2,1,3,0,1,2,4,2,2,1,3,2,1,2,0,4,4,0,3,1,3,2,0,3,2,3,2,3,4,3,1,1,2,2,1,3,1,3,2,2,1,3,3,3,1,1,1,1,3,2,4,3,2,3,4,0,1,0,2,3,1,1,2,3,3,3,1,3,3,2,3,4,4,2,1,0,2,2,1,2,0,4,0,3,3,1,0,3,3,1,3,3,3,0,3,3,0,4,4,0,1,3,0,2,3,4,1,4,0,0,3,0,1,2,1,1,2,2,2,0,2,2,2,2,2,2,0,4,4,2,2,2,2,2,2,3,1,1,2,2,2,4,4,2,2,2,2,2,2,2,2,0,2,2,2,2,2,4,2,4,2,0,0,2,2,2,2,2,2,2,2,2,4,2,2,2,2,2,2,2,2,2,2,2,2,0,2,2,2,2,2,2,4,2,3,2,2,0,2,2,2,2,2,2,2,2,2,2,2,2,2,2,2,2,2,2,2,2,2,2,2,2,2,2,1,2,2,2,2,2,2,2,2,4,0,0,4,3,3,4,1,1,3,1,3,3,1,3,1,3,1,3,3,1,1,3,4,3,0,4,3,3,1,1,3,1,3,4,0,0,3,0,0,0,2,0,1,0,1,4,1,1,0,4,3,3,1,0,3,1,0,0,3,1,3,1,3,4,0,3,1,4,0,0,3,4,3,4,3,1,3,4,1,4,0,1,0,3,3,3,0,1,3,1,1,1,1,3,3,2,4,3,3,1,1,2,0,2,2,3,1,4,2,0,3,4,2,4,4,4,1,2,2,4,1,3,1,3,3,4,4,3,3,4,1,4,2,2,2,2,1,3,3,4,2,2,4,4,3,2,2,1,3,4,4,1,3,3,2,3,2,1,2,2,1,0,0,3,3,1,2,3,1,3,0,1,2,3,2,1,3,2,0,3,3,1,3,1,1,2,1,3,1,3,4,1,2,2,1,1,0,3,2,1,0,3,1,2,2,1,0,2,3,0,2,1,4,3,0,3,3,3,2,2,1,3,0,3,3,0,0,3,4,3,4,0,0,0,0,4,0,0,3,1,4,2,4,2,4,2,0,1,3,0,4,2,4,3,0,1,4,4,1,4,4,0,2,2,3,0,0,2,3,0,2,4,0,4,4,0,3,2,3,4,4,3,3,2,0,2,4,4,4,3,2,2,1,0,0,0,1,0,3,1,0,4,0,1,1,1,4,4,4,2,4,3,2,2,4,0,2,4,2,1,0,3,4,3,0,4,0,3,0,4,4,0,0,0,4,4,3,4,2,2,4,4,0,0,2,4,0,3,3,0,4,4,3,1,1,1,3,0,1,3,3,3,4,3,1,2,4,3,2,3,0,1,0,1,3,4,0,2,1,4,2,1,0,0,3,3,1,3,1,2,1,3,4,4,3,0,0,2,4,0,1,0,1,0,0,0,1,1,1,3,3,4,4,1,0,0,1,1,1,4,4,3,0,0,1,0,3,2,4,4,3,3,4,3,2,4,0,4,0,2,1,1,0,3,0,4,3,3,0,4,4,4,2,2,1,0,1,0,4,4,4,1,2,0,0,2,3,1,2,0,2,4,0,1,2,0,3,4,3,2,1,0,4,0,2,3,1,3,0,1,1,1,2,0,0,4,4,1,1,3,4,1,1,3,3,4,3,3,1,2,2,4,3,3,3,3,2,0,0,2,2,2,4,4,3,2,4,4,4,3,4,1,0,0,0,0,1,4,0,3,0,0,0,1,1,2,4,0,4,0,4,4,1,1,0,4,0,1,3,4,1,4,1,4,4,1,0,0,4,3,4,4,0,0,3,4,4,1,0,0,0,0,3,1,1,0,4,4,0,0,3,1,3,0,1,3,3,3,2,0,2,2,0,3,2,3,0,1,3,0,4,1,2,2,2,2,2,0,3,1,0,0,0,1,4,0,4,1,1,1,4,0,4,0,2,4,1,3,1,1,0,3,4,4,4,4,4,1,0,4,0,4,0,0,0,4,0,1,0,4,4,0,4,4,0,4,1,1,1,0,1,3,3,3,3,3,2,2,2,2,3,1,3,2,2,1,3,1,2,1,4,3,4,1,0,0,0,4,4,0,0,0,1,1,3,1,4,0,3,4,1,0,3,4,1,4,1,3,3,0,1,1,0,0,0,4,4,4,1,1,1,3,3,0,2,2,3,3,3,4,4,4,4,4,3,0,3,4,4,3,1,4,3,0,1,0,1,1,3,3,1,0,3,3,4,3,1,4,3,1,0,1,1,0,1,3,0,1,1,1,1,0,4,0,0,3,3,4,1,4,1,3,1,1,0,3,4,0,3,4,4,4,4,4,0,1,4,2,3,3,1,0,4,1,2,2,1,1,0,4,0,0,4,0,4,2,4,4,4,0,4,2,1,2,4,0,3,2,4,0,0,2,2,0,4,0,1,3,4,2,1,0,1,0,3,4,4,1,2,3,0,3,1,3,1,1,2,0,3,1,1,1,0,0,3,2,0,1,1,1,1,1,4,1,0,3,3,1,3,3,3,3,1,0,3,1,4,3,0,0,4,3,0,2,3,1,3,0,0,3,3,1,3,1,3,1,0,1,1,1,4,1,4,0,3,1,3,3,4,4,3,1,0,0,4,0,0,1,4,2,4,3,2,1,1,1,1,4,0,0,3,1,1,0,1,3,1,1,4,3,1,1,1,2,4,2,3,1,1,0,4,3,3,2,4,0,2,2,0,2,2,2,0,4,2,0,2,2,2,4,0,0,4,2,0,2,2,2,2,0,2,4,3,4,4,2,2,2,3,0,1,1,1,4,0,1,4,1,0,4,4,3,0,0,1,1,3,1,1,1,4,1,0,3,0,3,3,3,1,1,0,0,3,3,1,3,1,1,1,0,4,4,0,3,1,3,1,2,3,1,2,2,2,3,1,3,3,0,1,3,3,3,4,4,3,1,0,1,1,4,4,3,1,0,2,2,4,1,1,4,0,3,0,0,3,3,3,4,3,1,2,2,1,2,1,3,2,2,2,2,1,2,0,1,2,3,3,1,3,3,2,2,1,2,2,2,2,2,0,4,0,4,0,4,0,4,0,4,0,4,3,1,1,2,2,3,1,1,1,3,2,3,4,0,3,1,3,1,3,3,3,3,2,3,3,2,2,2,2,0,1,1,1,3,4,2,0,3,3,3,1,2,2,1,1,2,3,0,3,3,1,3,1,2,3,1,2,0,0,2,2,0,1,2,3,1,4,1,1,3,3,2,1,1,2,1,3,1,2,3,1,1,1,0,4,0,1,4,2,2,4,0,1,2,1,2,2,2,1,2,2,1,2,2,0,0,2,2,0,2,2,2,2,3,2,1,3,2,2,3,2,1,3,2,2,2,3,2,3,4,1,1,4,2,1,4,3,0,2,1,4,3,1,2,0,3,4,0,4,1,3,1,3,3,1,3,1,0,1,0,0,1,1,1,3,1,0,4,3,1,2,2,2,0,3,2,4,3,1,3,3,3,1,2,4,2,2,0,0,2,2,2,4,2,2,2,2,2,2,2,2,4,4,0,4,0,0,4,0,1,1,0,1,4,0,0,0,2,0,3,1,2,1,4,1,2,0,1,3,2,2,2,2,1,2,2,1,2,4,3,2,3,2,1,0,4,2,3,0,3,3,2,1,0,3,3,3,1,0,1,1,0,2,2,3,2,2,1,1,2,1,3,0,1,4,2,3,1,2,0,1,4,1,1,4,4,0,1,4,2,4,4,4,0,1,3,0,0,3,4,4,0,0,4,4,0,0,4,4,0,3,4,3,3,0,3,4,3,0,0,0,4,0,4,4,1,1,1,3,3,3,0,1,0,3,2,2,2,2,3,2,3,3,3,2,2,2,3,2,3,3,1,3,1,3,3,3,1,3,1,1,1,3,1,3,3,3,4,3,0,1,1,2,1,3,1,1,2,3,1,2,2,3,3,1,1,3,1,1,1,1,3,2,3,1,1,1,1,1,1,3,2,1,1,1,1,3,3,2,3,2,1,3,3,3,3,1,1,4,1,2,1,3,3,1,1,1,1,3,1,2,1,1,1,1,2,1,2,2,1,1,3,0,3,2,2,1,2,2,1,0,3,3,2,1,3,1,1,2,3,3,3,3,3,3,2,1,3,1,3,1,1,3,3,3,3,1,1,3,1,3,1,1,2,1,1,4,1,1,0,1,4,1,0,0,3,0,3,4,0,0,1,0,4,0,3,3,3,1,1,1,0,3,0,3,4,0,4,3,1,3,3,3,1,4,1,1,1,3,3,3,1,3,0,0,4,3,1,3,1,3,0,3,2,1,3,2,3,0,3,1,1,2,2,3,3,1,3,3,1,3,2,1,1,2,4,0,0,1,1,3,3,3,1,2,1,1,2,3,3,3,2,2,3,3,3,1,2,3,2,3,3,1,1,1,3,3,1,3,2,2,2,1,3,2,0,4,2,1,1,1,3,3,1,3,2,3,0,2,3,4,3,0,1,1,4,3,3,0,0,2,2,2,0,2,2,2,4,2,0,2,4,2,4,2,0,2,2,0,4,2,0,2,1,1,2,4,4,1,0,2,3,0,4,3,1,0,4,0,4,3,2,4,4,4,4,4,2,3,1,1,4,1,2,2,1,4,4,3,2,2,4,2,0,3,0,3,3,4,2,0,2,3,0,2,0,3,4,2,4,0,2,1,0,1,3,0,1,1,0,4,0,1,2,1,4,2,1,2,3,2,3,2,3,3,4,4,1,1,0,4,1,0,1,4,0,1,3,1,0,2,0,1,2,3,4,4,0,1,4,4,3,4,3,3,3,4,4,1,1,1,1,2,1,3,0,1,1,4,2,1,4,3,3,3,0,1,4,1,2,4,3,2,0,3,1,0,0,2,3,1,4,2,4,2,3,3,2,3,4,1,1,0,0,2,2,4,3,0,0,1,1,2,4,2,2,4,3,4,3,1,4,4,0,2,2,4,3,1,1,1,2,1,3,1,4,4,1,2,3,4,1,0,1,2,4,3,0,3,3,4,1,2,1,1,3,2,3,3,3,0,0,0,3,0,4,3,1,0,3,3,0,4,0,0,0,4,0,1,2,4,3,4,4,4,4,1,1,0,0,1,4,1,0,2,1,3,0,2,4,0,0,0,2,2,2,2,4,2,2,2,4,0,0,0,2,0,2,2,4,2,2,2,0,2,4,2,2,4,0,2,2,2,2,2,2,2,1,2,3,1,2,3,1,2,2,3,3,2,2,1,3,0,4,1,3,0,1,3,4,4,4,4,4,1,4,0,3,0,0,4,4,4,3,4,3,0,4,3,3,3,0,1,0,4,4,0,4,4,0,1,4,1,0,0,1,3,4,1,4,0,3,3,4,3,3,1,4,0,3,3,0,4,1,0,0,0,4,0,0,3,3,1,4,1,0,3,4,1,1,0,4,4,4,4,4,0,3,4,0,4,4,1,4,4,0,0,1,3,4,3,3,3,1,1,3,4,3,1,0,0,0,3,4,4,3,1,3,4,3,1,4,1,1,3,0,0,4,0,0,1,0,0,4,4,1,0,3,0,1,4,0,3,3,3,0,1,1,4,4,1,3,0,0,4,3,0,4,1,4,4,0,3,1,3,4,3,3,0,1,3,4,1,3,4,0,1,3,0,1,1,1,4,4,0,0,0,1,3,3,3,3,3,3,4,0,4,0,0,1,1,4,1,0,0,0,1,3,3,2,2,4,3,1,0,4,4,2,2,0,3,4,4,3,4,0,3,0,3,1,1,4,0,4,1,3,3,1,0,2,0,0,0,2,1,1,2,2,1,2,0,1,1,3,2,4,4,3,2,3,3,1,1,2,3,1,3,1,3,4,4,1,1,1,2,2,3,1,3,3,3,2,2,1,2,3,3,0,4,1,1,2,3,3,3,1,4,1,4,1,3,0,3,1,1,3,4,1,0,0,2,2,2,0,3,3,2,2,3,1,3,0,1,4,3,2,0,1,0,1,4,0,0,3,3,1,1,1,3,1,2,3,3,4,4,2,3,2,2,2,2,2,4,3,3,3,0,3,0,0,2,4,4,3,3,3,3,0,3,3,2,2,3,1,3,1,1,3,1,4,0,3,0,1,1,3,3,1,2,2,1,3,1,4,3,1,3,4,3,2,1,2,2,3,3,1,2,1,1,3,1,2,1,1,1,1,1,2,3,3,1,3,1,4,3,1,1,3,3,3,1,3,1,1,3,3,1,2,3,2,0,3,1,0,3,3,0,3,3,1,0,0,2,2,1,3,1,3,1,3,1,3,2,3,3,3,3,1,3,2,0,3,0,2,1,3,3,1,3,1,3,1,2,2,3,1,3,0,3,1,3,3,2,3,1,3,3,1,4,4,2,0,3,2,2,0,4,0,3,1,2,1,2,0,2,4,4,0,2,0,4,0,4,4,4,1,4,2,4,1,1,0,4,0,0,4,0,4,0,0,4,4,4,0,0,0,4,3,0,4,4,0,3,4,4,1,3,1,1,1,1,4,0,1,1,4,1,1,1,3,1,3,3,3,3,3,1,0,0,2,4,0,0,1,4,0,0,1,4,2,3,4,2,1,0,1,2,0,0,2,1,2,2,1,2,1,3,2,1,1,1,3,3,2,2,2,2,1,2,4,0,2,1,0,3,3,1,2,2,4,3,3,2,4,4,2,1,2,0,2,2,1,1,2,1,1,3,4,0,2,1,0,1,4,4,0,0,0,3,0,0,4,3,3,4,3,1,4,0,2,4,4,0,0,4,0,0,4,0,4,0,4,0,3,1,1,1,3,1,4,4,1,0,4,2,2,0,4,4,1,4,0,0,4,1,4,2,1,1,0,0,4,3,0,4,0,4,4,0,0,3,4,0,3,0,4,4,0,4,0,2,3,0,3,3,2,0,0,4,0,0,0,0,3,3,4,3,4,3,4,0,0,0,3,4,4,1,3,3,1,1,3,3,3,1,1,4,3,1,1,3,1,0,3,1,3,4,4,4,3,1,3,3,1,3,4,2,4,3,3,4,3,2,3,1,1,1,1,1,0,4,3,3,1,4,3,4,1,3,0,1,1,1,1,1,3,3,3,1,3,3,0,1,4,1,3,1,2,1,2,3,1,3,1,1,1,3,3,2,2,3,3,1,2,2,3,2,3,1,3,3,2,4,1,0,2,2,3,4,0,2,4,2,1,1,4,0,0,4,2,1,2,0,1,1,0,3,0,0,3,3,4,1,4,4,4,1,4,1,1,1,1,1,2,2,1,2,2,1,3,1,4,1,4,3,1,3,1,3,3,1,3,4,3,4,1,3,3,3,1,0,1,0,3,3,3,1,2,3,1,2,0,1,0,0,2,0,4,3,0,4,4,3,1,1,1,1,0,1,3,3,1,2,2,4,0,0,0,2,4,0,2,0,2,1,2,3,3,2,0,2,4,2,3,2,1,1,3,1,3,1,1,3,0,3,3,2,1,0,2,1,1,0,2,3,4,1,2,1,0,2,1,1,3,3,2,3,3,2,0,3,4,4,3,0,1,0,1,0,4,4,0,0,1,3,3,1,2,0,3,1,0,1,3,4,1,3,3,0,3,1,3,1,4,1,0,4,3,1,1,3,1,3,3,3,2,3,2,0,2,3,3,1,2,0,4,3,3,1,1,3,0,3,0,3,4,1,3,4,3,2,4,2,4,0,3,0,0,0,3,3,1,3,1,4,1,3,3,1,0,1,4,2,0,1,4,3,0,0,4,2,0,1,4,4,2,0,2,4,4,4,2,0,4,4,3,2,0,2,0,0,4,3,3,3,3,0,3,3,3,2,1,3,1,4,0,4,1,0,1,4,3,1,4,1,1,4,1,3,0,3,0,1,1,3,3,2,3,3,2,3,1,3,2,2,1,1,3,3,1,3,1,1,4,2,3,0,3,1,3,3,4,2,4,3,1,0,2,3,3,0,0,4,3,4,2,3,3,3,4,1,2,1,1,3,3,1,2,2,4,0,4,3,4,3,0,3,3,3,4,2,1,3,2,1,2,4,4,1,0,1,1,4,3,3,4,1,3,1,1,2,1,0,0,3,1,4,3,3,4,1,2,3,3,0,0,1,3,0,0,3,2,1,2,2,2,3,2,2,1,4,1,0,4,4,1,3,0,3,0,3,1,1,3,3,3,2,2,2,1,1,1,4,0,2,1,1,0,1,3,1,1,3,4,4,4,4,4,3,1,3,2,3,4,1,1,1,1,3,2,2,4,0,3,0,4,1,1,0,3,3,2,2,2,4,4,0,0,1,0,0,1,3,3,3,1,0,4,1,3,3,4,4,3,1,3,3,2,3,0,1,1,4,2,1,4,1,1,2,1,0,0,3,0,2,0,3,1,3,3,3,1,3,4,1,1,1,3,4,4,2,0,2,4,2,1,4,0,1,2,1,1,2,1,2,1,2,0,1,2,4,3,2,3,2,2,2,3,4,2,2,2,4,0,4,0,0,4,3,4,3,4,1,1,0,3,0,1,1,2,2,3,0,0,1,1,2,0,0,2,2,4,3,0,0,1,2,2,2,1,2,1,3,2,4,4,3,4,2,1,3,2,2,2,4,3,4,4,0,3,4,4,3,4,1,4,4,3,1,0,3,0,1,4,0,0,4,0,4,0,4,4,0,4,1,3,1,2,1,3,0,2,0,2,2,4,4,0,4,4,4,0,4,4,0,4,0,0,4,4,0,0,4,0,0,0,4,4,4,4,4,0,0,4,3,0,4,0,0,3,0,2,1,2,1,3,0,3,3,1,4,3,0,1,2,1,4,4,0,4,3,3,4,4,1,3,3,3,4,0,3,1,2,2,4,0,2,0,4,2,2,1,3,2,4,2,3,0,4,2,1,0,2,2,2,2,2,4,2,1,2,2,2,1,4,3,2,3,0,2,0,2,2,4,2,2,4,2,4,2,4,4,0,2,0,4,2,4,4,4,4,0,2,2,0,4,4,4,2,4,0,0,2,4,4,4,0,0,4,2,4,2,2,2,2,2,4,2,2,4,0,2,2,0,2,4,0,2,1,2,2,2,2,2,2,4,2,2,2,2,2,0,2,2,2,2,2,2,2,2,0,4,0,2,2,2,4,2,2,0,2,2,0,2,2,2,2,4,4,0,4,4,4,4,4,0,4,4,0,0,4,0,0,0,4,4,0,4,0,0,0,0,0,0,0,4,0,3,2,0,0,4,4,2,0,2,4,4,4,4,0,4,2,2,0,0,4,2,2,2,4,2,4,2,2,3,1,2,3,2,4,4,3,3,4,1,0,4,2,4,1,2,2,3,3,0,1,1,3,2,3,3,4,1,0,3,2,3,0,1,2,3,3,0,1,0,4,0,1,2,0,1,2,1,1,1,2,2,3,3,2,1,2,2,2,4,1,4,0,2,1,3,4,2,2,2,2,2,0,0,3,0,3,0,4,4,4,0,4,4,0,1,0,4,0,4,4,1,1,1,1,0,0,4,0,0,2,2,2,0,4,4,0,2,0,4,4,4,4,0,4,0,4,2,2,2,3,3,4,0,4,4,0,0,4,4,0,3,0,3,0,0,4,4,0,0,2,0,0,2,0,2,0,4,0,4,0,0,0,4,4,4,0,4,4,0,1,4,3,3,0,0,0,3,3,4,3,3,4,1,4,3,1,4,0,4,1,0,3,1,4,1,0,4,3,4,0,3,3,1,1,4,0,0,0,1,0,3,0,0,3,3,1,4,4,4,4,1,3,3,1,0,2,2,4,2,2,2,4,1,4,2,0,4,0,2,2,0,2,3,2,1,1,4,4,2,4,0,4,2,2,0,2,4,2,2,4,2,2,2,2,2,2,0,0,2,2,4,2,2,2,1,2,1,1,1,0,1,1,4,3,1,0,2,2,2,0,2,1,2,1,0,2,3,3,4,2,4,2,2,3,0,2,4,1,2,2,2,0,4,4,2,4,0,4,2,3,2,0,0,0,4,4,4,2,2,2,1,4,1,3,2,0,3,2,0,1,4,1,0,1,2,1,1,3,1,2,2,2,4,4,4,2,2,0,2,2,4,2,4,4,4,0,4,2,0,1,1,4,0,3,1,2,2,2,1,2,2,1,2,0,2,1,2,0,0,2,2,2,1,3,0,1,3,1,2,1,3,2,4,3,1,0,1,1,2,3,3,3,3,3,1,1,1,0,1,3,2,2,2,3,2,4,2,0,4,2,0,3,0,0,1,1,3,1,3,4,4,3,1,3,3,2,2,2,3,2,2,1,2,1,2,2,3,2,4,1,1,3,2,1,0,2,3,4,3,4,3,2,1,1,0,1,0,2,2,2,1,2,1,4,2,1,2,2,1,3,3,4,1,0,2,3,2,2,2,2,2,2,2,2,2,2,2,2,0,0,2,2,2,4,2,2,4,0,2,2,4,2,4,2,2,2,1,2,2,4,2,2,2,2,2,2,2,2,2,2,3,1,2,2,2,2,2,1,2,3,2,2,2,1,2,2,2,2,2,2,2,2,2,2,2,2,2,2,2,0,2,1,2,1,2,2,2,2,2,2,1,1,2,2,2,2,2,2,2,2,2,2,3,2,2,2,2,2,2,2,2,2,2,2,2,2,2,2,2,2,2,2,2,2,2,2,2,2,2,2,2,2,2,0,2,2,2,2,2,2,2,2,2,2,2,1,2,2,2,2,2,2,2,2,2,1,2,3,2,2,2,2,0,0,1,1,2,1,0,2,2,1,2,3,4,3,2,3,1,2,3,2,3,0,1,4,2,3,0,2,0,3,0,4,1,2,2,3,1,3,0,0,0,3,0,0,4,4,1,0,4,1,1,4,0,0,3,4,3,4,0,3,0,4,0,3,0,4,4,0,4,3,4,0,4,1,0,1,3,0,4,3,1,3,3,3,1,0,1,0,0,0,3,1,1,1,0,3,0,3,1,4,3,3,4,0,1,0,4,1,1,4,2,2,4,2,4,2,0,4,3,4,0,3,0,0,0,1,1,4,0,2,2,0,1,2,4,4,0,4,0,0,4,0,3,4,4,0,1,1,3,2,1,0,0,3,2,0,3,1,3,3,3,4,4,0,4,4,3,2,0,2,4,2,3,0,4,1,0,1,1,0,0,2,1,1,0,3,4,1,0,3,1,2,3,2,4,3,4,4,1,3,1,3,1,4,1,0,0,2,3,3,1,1,3,1,3,1,1,1,4,1,1,2,2,3,3,0,0,1,2,4,4,2,4,3,2,1,2,2,1,2,2,3,2,2,2,2,3,3,2,3,1,1,1,3,0,3,3,3,3,2,3,4,1,4,0,2,3,3,0,0,4,2,2,0,3,2,3,0,1,2,0,0,3,3,1,1,1,2,3,3,3,2,3,2,3,2,1,2,1,3,2,2,1,1,1,2,1,4,2,1,4,3,1,2,4,3,2,3,3,4,4,2,3,0,2,1,3,3,3,1,2,3,3,0,2,1,4,1,3,3,4,3,1,3,1,3,2,2,2,0,0,1,0,0,3,3,1,3,1,1,0,4,2,2,1,1,3,1,2,2,3,1,1,4,1,4,3,1,1,0,1,3,3,1,1,3,0,4,1,1,1,1,1,0,4,1,1,2,3,1,1,3,3,0,0,1,2,2,3,2,3,3,3,3,2,2,2,1,1,2,4,1,2,2,0,0,3,0,3,1,1,3,3,0,0,4,1,3,3,0,0,0,0,4,3,1,0,0,3,3,3,0,3,1,1,2,3,0,2,2,3,3,1,1,0,3,2,2,4,4,0,0,4,4,0,0,0,4,4,0,1,4,3,2,0,0,1,3,3,1,1,3,1,1,4,0,2,2,0,1,1,0,1,3,1,1,3,0,0,0,3,1,3,3,3,4,3,2,3,0,0,1,1,0,1,3,0,3,2,2,2,4,0,1,2,1,4,1,3,2,0,3,0,1,1,0,2,3,1,1,2,0,1,1,2,4,0,2,3,0,1,0,1,4,3,1,1,1,3,1,1,2,3,2,3,2,2,3,3,1,3,0,1,2,3,2,2,2,1,1,0,1,2,0,3,3,1,0,1,4,4,3,2,0,3,3,4,2,0,4,2,3,0,3,2,0,2,2,0,3,3,2,2,3,2,3,1,2,4,2,4,0,3,1,2,2,1,2,2,2,4,4,4,1,3,3,2,3,4,4,0,0,2,3,4,3,4,0,2,2,1,2,4,2,2,4,2,3,2,2,2,2,2,4,4,4,2,3,1,3,1,1,4,0,1,3,3,1,3,3,1,1,3,2,2,2,2,2,3,1,3,2,4,4,1,1,2,0,3,2,2,2,0,3,2,4,2,2,2,4,4,2,2,1,3,1,4,2,3,4,1,3,0,4,1,3,3,4,1,4,2,3,2,3,2,2,2,0,4,1,1,2,0,4,0,2,1,1,3,2,3,4,3,3,1,1,2,2,2,2,3,1,2,2,2,2,0,2,2,4,1,0,3,0,0,0,1,3,2,0,2,2,1,4,4,2,4,1,4,0,3,3,3,0,1,4,4,1,4,2,0,0,3,1,3,1,1,4,1,3,0,2,0,4,2,2,2,2,4,1,1,4,4,1,1,3,2,1,1,1,3,3,4,3,4,0,1,4,4,3,2,3,2,1,1,3,3,1,2,4,3,2,2,2,1,3,1,3,1,3,1,4,1,2,3,1,2,1,2,2,1,2,3,0,1,1,2,3,2,3,1,2,1,1,3,1,3,3,3,4,2,2,4,2,1,1,1,3,4,0,3,4,3,2,2,0,2,2,4,2,4,2,0,2,2,2,2,2,2,2,2,2,3,1,2,1,3,1,1,3,0,0,0,2,2,0,4,4,2,1,3,3,2,2,3,3,2,2,0,1,4,2,2,4,3,0,2,2,1,3,1,2,3,4,1,3,4,0,2,1,4,3,0,3,3,1,1,2,0,3,2,0,0,0,0,4,2,4,3,2,1,4,0,2,1,3,4,0,1,1,3,2,1,2,3,3,2,0,4,3,1,2,2,2,2,1,3,3,2,2,3,0,3,2,4,1,1,3,1,1,1,1,1,4,1,0,1,2,3,0,3,4,1,2,2,2,3,3,3,0,4,1,4,1,0,4,3,0,2,2,1,1,3,0,4,4,4,0,3,2,2,1,3,4,1,1,1,2,1,2,0,1,1,3,0,0,1,4,2,1,1,0,2,2,3,1,1,0,2,4,0,2,2,0,1,0,1,1,4,1,4,4,1,3,4,0,0,2,2,3,3,3,2,1,0,0,4,1,3,1,3,2,3,3,2,3,4,4,3,0,4,3,4,3,2,4,4,1,1,1,1,2,1,0,1,4,0,3,3,3,3,3,2,1,1,4,3,2,0,2,3,4,3,2,0,2,4,4,2,2,1,2,1,1,4,0,4,3,3,0,4,4,0,0,4,0,0,4,0,0,4,0,0,4,4,0,4,4,4,4,4,0,0,4,0,1,4,4,3,1,3,3,0,1,3,3,1,2,0,4,3,3,2,3,2,3,0,3,2,4,3,2,4,3,0,2,1,0,1,3,0,4,0,4,0,3,1,3,3,3,4,2,4,2,4,0,0,2,3,1,2,1,3,0,1,1,1,0,4,3,2,3,1,2,2,2,2,2,2,1,3,1,0,3,2,1,4,4,1,0,1,1,1,4,3,4,3,2,2,4,4,0,1,0,4,0,0,0,4,1,1,1,3,3,0,0,4,3,2,4,2,2,2,3,3,1,3,1,3,1,1,1,1,0,0,4,0,0,0,0,0,4,0,4,4,4,0,0,4,0,0,4,4,4,0,1,1,1,3,3,1,3,3,2,1,3,1,1,1,3,3,3,2,2,2,2,2,1,2,4,4,0,4,4,4,4,0,4,4,4,0,3,0,1,1,3,3,2,2,1,3,2,3,2,1,1,1,3,3,3,1,1,1,1,3,1,1,1,2,2,3,1,2,4,4,0,0,0,4,2,2,4,4,2,0,4,0,0,4,0,4,0,4,0,4,0,4,4,0,0,4,4,2,2,0,1,2,2,0,3,4,1,3,2,0,4,0,2,4,4,4,2,4,2,4,0,0,2,2,4,4,2,4,2,2,2,0,1,4,3,1,4,0,3,3,4,1,3,1,3,1,1,1,1,3,3,1,2,1,3,3,1,1,3,3,1,3,3,1,1,3,2,3,4,1,1,1,1,1,2,2,1,4,1,1,3,3,2,3,1,1,3,1,1,1,2,1,3,0,1,3,1,3,3,3,3,3,3,2,1,2,2,3,1,2,2,1,1,1,3,1,0,2,0,4,1,1,1,3,2,1,3,3,3,4,4,4,1,2,3,3,1,2,4,3,2,2,2,1,3,1,2,2,2,2,2,4,2,2,0,2,2,2,2,2,2,2,2,2,2,2,2,2,4,2,2,2,2,2,2,2,2,2,2,2,4,2,4,2,2,2,2,2,0,4,4,4,2,2,2,2,2,4,2,2,2,0,2,2,2,2,2,2,2,2,2,2,4,2,2,2,2,2,2,0,4,2,2,0,2,2,2,2,2,2,0,2,0,2,2,2,2,2,0,2,2,0,2,1,2,4,1,0,3,2,4,4,2,3,3,2,2,3,4,4,0,2,2,4,2,0,2,4,4,2,0,0,4,0,0,2,4,0,2,3,0,4,2,0,0,0,0,3,0,0,4,3,4,0,2,0,2,0,0,2,2,4,1,2,4,1,1,3,3,3,0,2,4,4,1,3,3,2,2,1,2,0,3,2,1,0,3,1,0,1,0,4,2,4,0,2,0,4,1,4,1,3,0,3,3,2,1,1,2,4,0,4,0,0,4,0,4,0,1,3,0,2,0,1,4,1,2,1,1,3,4,1,0,1,3,3,3,2,3,2,1,3,0,2,3,2,3,1,1,3,2,1,1,3,3,4,0,3,2,4,4,3,1,0,0,1,1,1,1,0,1,1,4,1,3,4,2,3,0,0,3,1,3,0,3,3,3,4,4,0,1,2,2,2,4,4,0,4,2,4,4,4,4,0,4,0,2,0,4,3,1,1,3,2,3,2,1,0,2,1,0,3,3,3,0,0,4,4,3,4,1,3,2,0,4,1,3,2,3,4,0,4,3,4,1,0,0,0,0,3,3,1,0,4,1,2,4,3,4,0,1,0,0,1,0,4,1,4,4,4,3,4,3,0,1,3,3,3,2,3,3,0,0,0,2,3,0,0,3,1,4,4,1,0,3,4,0,0,3,4,0,1,0,2,4,0,2,4,2,4,2,4,1,3,0,3,1,1,4,2,0,1,3,1,1,1,3,3,4,1,1,1,1,3,3,3,1,2,1,3,3,2,2,3,3,3,1,3,2,1,2,2,2,1,2,0,1,3,3,3,1,3,3,1,2,1,3,3,1,0,4,4,1,1,0,1,1,1,1,0,2,1,4,3,0,1,4,3,4,2,4,0,4,4,1,3,0,4,3,4,2,1,3,2,0,3,1,1,4,3,4,0,2,3,1,4,4,3,0,4,1,4,4,0,4,2,0,0,4,0,1,2,2,2,3,3,1,0,1,3,3,0,3,0,1,0,0,1,0,2,4,0,0,0,3,1,3,2,3,1,1,0,3,1,1,0,2,1,0,4,3,3,4,1,4,3,4,1,3,4,3,3,3,3,1,1,1,1,4,0,3,1,0,1,4,0,3,0,3,2,0,1,4,4,3,2,0,4,1,4,4,2,4,4,2,0,4,0,4,0,0,0,0,4,0,3,4,3,4,1,3,1,3,3,1,1,4,1,2,1,1,0,1,4,0,1,1,0,1,1,3,1,3,3,0,0,0,2,1,3,2,3,2,2,3,1,1,3,3,1,3,2,3,1,1,3,1,2,2,1,1,2,3,2,2,1,2,2,2,2,2,3,1,2,3,1,2,1,3,2,4,0,1,1,3,1,1,3,2,3,3,2,2,3,1,3,3,2,3,1,0,0,1,1,2,1,1,1,3,3,1,3,3,2,1,1,1,1,1,1,2,1,2,1,2,0,0,3,2,1,0,2,3,3,3,0,3,2,2,1,3,3,3,1,1,1,2,1,4,0,4,1,3,3,2,0,2,3,2,2,3,2,4,2,2,4,0,1,2,2,3,2,3,3,1,3,1,1,2,2,2,3,3,3,4,2,2,3,0,0,3,2,0,0,2,4,3,1,3,0,3,3,4,2,4,1,0,4,2,4,2,3,3,0,4,2,4,2,2,2,0,0,0,0,2,2,2,4,2,4,0,1,0,3,4,1,4,0,1,3,3,3,1,1,1,4,2,3,1,4,3,3,2,1,3,4,4,1,3,3,1,4,3,4,1,4,0,2,3,1,3,2,1,4,1,3,1,0,3,0,3,3,4,3,3,0,2,2,1,4,3,3,4,4,0,3,1,3,0,0,1,3,2,1,0,1,2,4,3,0,3,0,4,0,3,0,3,2,0,2,2,0,4,4,0,4,0,2,4,1,1,0,3,1,4,4,1,1,0,0,4,3,3,4,0,4,4,3,2,1,3,0,3,0,4,4,4,1,3,0,2,4,4,3,4,2,1,2,4,2,0,4,2,1,4,3,3,1,2,0,0,2,2,0,2,4,4,0,2,4,0,0,2,3,3,2,1,1,4,2,0,4,2,3,3,4,2,3,1,2,2,4,2,0,2,0,4,2,2,3,4,1,3,1,1,1,3,1,0,3,2,4,2,0,1,3,3,3,1,3,0,4,1,1,3,0,1,4,4,0,3,1,0,1,1,2,2,3,1,1,4,2,2,4,1,3,1,3,1,0,0,1,0,4,4,3,0,3,3,1,1,3,3,3,0,3,0,0,4,0,1,2,2,3,1,2,3,0,1,0,2,4,1,3,4,0,3,0,3,0,3,3,1,0,0,3,3,4,3,3,0,1,3,4,4,3,3,2,0,1,3,3,3,3,1,3,2,4,2,0,1,2,0,2,2,3,1,4,3,1,4,0,0,3,1,4,0,0,2,2,2,2,4,1,2,2,4,0,3,2,4,3,2,4,4,4,3,1,4,3,0,1,3,4,0,3,3,3,3,0,2,1,3,3,1,1,1,0,2,0,0,0,0,2,2,3,0,0,0,1,4,3,2,4,2,2,0,2,1,0,4,4,2,1,4,3,1,0,0,1,1,2,0,0,4,1,0,0,3,0,3,2,3,4,4,4,1,4,1,1,0,1,4,0,3,3,4,3,2,3,3,4,3,3,4,1,0,1,4,3,0,2,4,4,4,2,1,1,3,0,2,1,4,0,3,1,4,4,4,4,0,0,0,4,0,0,4,3,2,2,2,2,0,1,3,3,2,2,3,0,1,1,1,1,4,3,1,3,1,0,4,2,2,2,2,1,2,0,3,0,1,2,3,2,3,3,2,2,2,3,4,3,3,2,4,2,1,4,2,2,2,4,1,2,4,3,3,3,3,1,3,3,3,1,3,2,2,1,3,4,3,3,2,2,2,2,2,4,3,0,1,2,2,4,2,4,0,0,4,4,1,3,1,1,2,3,4,4,4,4,0,2,0,2,2,0,4,4,0,0,0,0,1,1,2,3,4,0,2,2,1,4,1,0,1,1,1,2,1,2,4,0,4,3,2,1,1,1,1,1,0,4,4,0,1,3,4,2,0,4,2,4,2,0,0,0,3,1,1,4,1,1,2,2,2,2,2,1,0,2,2,3,0,4,0,1,1,4,2,0,0,0,0,0,3,4,3,1,3,3,4,1,1,3,1,1,2,1,0,0,2,4,3,4,0,2,3,3,1,4,1,3,3,2,3,0,3,1,2,1,4,4,2,0,1,0,1,4,1,0,1,2,2,3,2,1,3,4,2,0,4,0,2,1,3,3,3,3,1,3,1,2,2,1,1,1,1,3,4,1,0,0,1,0,4,0,3,2,0,2,0,4,4,1,2,0,4,3,1,1,3,1,1,1,4,2,4,1,2,2,1,0,4,3,1,3,4,3,0,4,0,3,1,0,4,2,2,2,3,3,0,2,0,3,1,2,1,1,3,4,0,0,0,4,4,3,4,1,1,0,3,3,1,2,4,3,4,4,3,1,3,0,4,0,2,3,0,3,3,0,3,2,1,1,0,4,0,0,0,2,1,0,4,4,2,1,4,4,3,0,4,2,2,4,0,4,4,4,3,2,0,4,0,2,0,1,1,4,1,0,2,4,3,2,1,1,2,2,4,1,2,0,0,0,4
B112,1,1,1,3,3,0,3,3,3,2,2,2,3,1,0,2,2,0,1,4,4,1,2,0,1,3,1,3,4,4,0,0,4,3,3,1,4,0,4,0,0,4,0,1,1,1,3,0,3,4,2,2,2,2,3,2,1,2,0,4,3,0,2,1,3,1,0,2,2,2,3,4,4,0,2,2,1,2,0,0,4,2,3,1,2,2,2,2,4,2,2,2,2,4,2,4,2,2,2,4,2,0,4,2,2,2,0,2,2,2,2,4,0,2,4,0,2,2,0,0,2,0,2,2,4,1,3,2,3,3,1,3,2,1,2,1,2,1,2,1,3,1,1,2,3,1,2,3,2,3,3,1,2,1,2,1,2,1,2,2,3,3,1,3,2,2,2,2,2,1,0,0,4,2,4,2,3,3,1,2,0,4,0,4,0,3,2,1,1,3,2,1,2,2,3,1,1,4,2,2,0,4,2,0,1,0,4,2,3,2,0,0,3,3,2,2,2,3,0,3,1,1,3,1,4,0,0,0,0,0,4,1,2,3,2,3,3,3,4,3,4,3,1,1,0,1,2,1,3,1,1,0,4,3,3,3,0,1,3,1,2,2,3,2,3,1,4,4,4,0,4,4,3,2,3,4,2,3,1,1,3,1,1,4,3,3,4,1,4,1,0,2,3,3,1,1,3,2,2,0,0,0,1,2,1,0,3,3,4,3,4,1,4,4,3,1,1,0,1,1,3,4,2,1,1,1,3,2,4,2,2,1,2,2,3,1,3,1,3,3,1,2,3,3,3,3,1,2,4,2,3,3,1,2,4,1,1,3,0,3,1,2,4,3,0,4,1,2,1,3,3,0,0,2,4,2,0,1,3,3,1,2,3,2,3,2,1,1,1,2,1,4,1,1,2,1,1,3,0,2,2,4,0,1,2,2,1,1,4,3,1,1,3,0,1,0,3,4,4,0,0,4,0,1,3,0,2,2,1,1,1,1,2,4,3,3,4,4,2,2,4,0,0,3,1,4,0,3,0,0,1,2,1,3,2,3,1,0,4,1,3,3,3,3,2,1,1,3,1,1,1,3,2,3,3,1,0,1,0,2,2,1,2,0,1,1,0,1,0,0,0,1,1,4,1,3,2,1,2,1,1,2,1,0,4,2,2,1,3,1,3,4,2,2,1,3,1,3,2,3,1,2,3,2,2,2,2,2,1,2,1,1,3,2,4,2,3,3,3,4,3,3,2,0,2,0,3,3,4,1,2,0,3,2,2,0,3,3,3,3,4,1,3,1,1,2,1,2,3,2,3,0,4,1,4,0,0,2,2,1,3,0,2,1,4,3,1,1,1,1,2,0,3,0,4,0,3,2,2,0,1,0,3,3,0,4,1,1,0,4,2,2,1,1,1,2,2,2,2,2,2,0,0,4,2,0,3,2,2,0,3,4,1,4,2,2,0,1,0,1,0,0,2,4,0,2,0,2,4,1,2,0,2,4,1,2,0,2,2,1,1,3,4,1,3,2,2,4,1,2,2,3,1,2,4,0,2,3,2,1,1,4,2,2,0,3,2,3,3,4,2,2,2,2,2,2,2,2,1,2,2,0,1,1,1,4,3,3,1,3,1,3,3,1,2,3,2,1,2,3,0,3,4,2,4,2,4,2,2,2,2,2,2,2,2,1,1,2,2,3,2,2,3,1,3,3,2,4,0,1,3,3,3,4,3,1,3,3,1,4,1,1,3,3,2,3,2,0,2,1,0,4,4,2,3,0,4,2,3,2,1,1,3,3,3,3,2,2,2,4,3,1,3,3,1,1,3,0,2,2,3,3,2,2,2,0,3,0,2,1,3,4,3,2,4,2,1,1,3,1,4,0,2,3,1,2,0,0,4,0,1,0,1,2,1,1,3,1,3,3,3,3,2,3,1,3,0,3,1,2,1,2,2,3,3,2,4,1,1,1,3,4,0,1,2,4,1,1,1,4,0,3,3,3,1,4,4,3,1,3,1,1,2,3,1,3,1,1,2,3,3,3,1,0,0,3,3,2,0,0,2,2,2,4,3,1,3,2,3,1,0,1,4,2,0,3,2,1,4,4,1,2,2,3,1,4,2,4,4,3,0,2,4,4,4,2,2,2,0,3,1,0,3,1,0,4,3,4,4,2,1,3,3,1,0,3,3,4,1,0,4,1,4,4,4,3,3,0,0,4,3,4,3,2,2,4,3,1,4,0,4,1,4,3,3,0,0,1,4,0,3,3,0,0,1,0,3,4,3,1,4,3,0,4,1,0,0,0,4,0,1,0,0,0,0,1,1,0,2,4,0,1,2,2,4,1,2,2,4,1,3,2,0,0,0,0,1,4,4,4,2,4,1,0,4,2,0,2,0,4,0,4,4,2,4,4,3,3,2,3,4,4,0,0,0,3,4,0,1,3,0,1,4,2,2,4,0,0,4,0,1,0,0,4,0,4,1,4,4,2,4,3,0,0,4,4,0,4,4,2,0,4,4,3,4,0,3,0,4,4,1,3,0,0,3,1,0,2,3,0,4,4,2,3,2,1,1,4,4,3,3,0,1,4,4,0,4,1,3,3,4,0,2,0,1,1,4,4,1,0,1,4,4,4,0,4,0,3,4,0,4,0,4,0,3,4,0,3,4,4,1,4,1,3,1,0,3,0,0,3,3,0,0,1,0,4,4,4,3,3,3,0,0,4,4,0,0,0,0,1,3,3,1,1,4,4,0,0,0,3,4,1,3,4,1,3,1,1,4,4,0,3,4,1,3,4,1,0,0,0,4,1,1,4,0,0,0,4,0,4,0,4,0,4,0,0,0,1,4,3,0,1,1,0,3,0,4,4,2,4,4,1,0,2,1,2,1,0,0,0,2,0,1,0,4,0,4,4,0,4,0,3,0,1,0,4,0,3,0,4,0,4,0,1,4,4,4,0,4,0,1,0,0,0,3,1,3,4,4,0,1,0,0,0,1,4,1,3,0,4,1,1,1,3,0,0,1,2,2,2,4,2,0,4,4,2,4,0,2,4,2,2,0,2,2,2,3,2,2,2,4,2,3,2,4,2,3,2,2,2,0,3,0,4,3,2,3,0,0,2,4,4,1,4,4,4,1,0,1,1,4,1,4,4,4,4,1,1,0,4,4,3,0,4,4,1,0,3,2,0,4,2,0,0,4,0,4,0,3,4,0,2,2,4,4,1,3,4,0,1,1,2,2,3,2,2,0,0,2,2,0,4,2,4,2,4,0,2,2,4,2,2,4,4,4,0,3,0,0,0,1,3,0,4,0,4,4,0,4,4,4,4,1,0,1,3,0,4,0,3,0,0,4,4,4,0,0,4,1,0,0,4,0,0,4,4,4,4,1,4,1,4,4,0,0,4,0,1,4,2,0,4,0,3,1,0,1,1,0,4,1,1,4,2,1,1,2,2,1,0,0,2,4,0,1,3,2,0,4,0,4,0,0,0,0,0,4,4,4,4,0,3,1,1,1,1,3,3,3,1,3,1,0,1,3,1,2,1,3,4,0,1,2,0,1,2,3,3,3,2,4,3,3,1,1,1,2,3,1,1,3,0,3,1,2,0,1,2,4,1,1,3,2,4,0,1,2,3,3,3,1,1,4,2,2,3,3,1,4,4,3,4,3,0,1,0,1,0,4,4,0,3,4,0,4,4,4,0,0,0,4,0,4,0,0,3,4,0,0,0,4,4,0,4,4,1,1,4,1,1,1,0,0,0,0,4,0,4,0,4,4,2,3,3,1,4,3,0,4,4,3,4,0,1,0,3,0,4,4,4,1,3,4,1,1,3,0,0,4,1,0,3,0,4,4,0,0,0,0,1,1,1,1,4,0,4,2,1,4,1,1,3,4,4,1,4,1,4,4,3,0,2,3,4,0,1,4,1,1,2,3,3,3,0,2,2,3,2,3,1,1,2,0,3,3,3,3,1,0,4,0,4,2,1,4,4,1,3,4,3,0,3,3,3,2,0,3,3,3,4,4,1,1,3,3,2,1,2,1,3,0,0,0,0,4,1,1,0,0,0,0,3,4,4,3,4,4,0,0,3,0,3,3,2,4,1,1,2,3,1,3,2,4,3,1,3,3,4,2,3,2,3,3,3,3,1,2,3,0,0,4,0,4,1,3,1,2,0,1,1,1,3,2,0,2,4,1,2,2,3,4,2,3,2,2,3,0,2,1,2,2,2,3,1,2,1,4,1,3,2,0,2,1,3,2,0,4,1,3,4,3,0,4,4,4,4,0,3,1,1,3,2,3,1,3,1,1,0,1,2,3,1,1,1,2,2,3,3,2,1,3,2,1,4,1,1,3,1,3,2,2,3,1,1,3,1,3,1,1,3,2,1,3,1,3,2,3,1,1,2,3,3,1,3,1,1,3,1,3,1,0,1,0,3,3,3,4,4,2,2,2,0,4,2,0,0,2,2,4,2,0,2,2,2,2,2,0,0,4,2,0,3,0,1,1,1,1,4,0,1,0,1,3,3,3,1,0,0,0,0,2,1,0,1,1,1,4,2,4,4,4,0,3,4,4,4,4,0,2,4,4,0,4,3,2,3,1,3,2,3,1,3,1,1,1,2,3,1,1,1,4,3,2,2,1,3,1,1,3,3,1,0,2,1,3,2,0,2,2,4,0,2,0,0,2,2,4,2,0,0,0,1,3,3,2,1,3,3,3,3,1,3,1,3,1,1,1,2,3,1,1,3,3,3,2,2,3,2,2,2,1,2,0,2,2,1,1,0,1,1,1,1,1,3,3,0,2,0,0,4,4,3,3,2,4,2,4,4,4,2,3,0,0,1,3,3,2,3,4,2,3,2,2,1,1,4,2,2,2,2,2,3,0,3,0,0,4,2,4,0,1,2,0,2,1,2,2,0,4,0,3,2,0,0,4,3,1,0,4,4,3,0,3,2,3,2,4,1,3,0,0,0,4,4,0,2,3,3,1,2,3,2,4,4,0,2,1,3,2,1,4,0,3,4,2,1,0,1,0,4,4,3,1,3,4,4,4,4,0,2,1,2,2,3,3,1,1,1,0,2,2,4,0,0,0,0,0,4,4,1,4,2,2,4,2,4,4,2,4,0,0,4,2,2,2,2,4,2,2,2,2,1,0,3,4,2,3,3,3,1,2,3,1,3,3,3,2,2,4,3,1,3,1,4,0,4,4,1,3,1,1,3,3,1,2,2,2,2,1,2,3,2,0,4,1,0,0,3,2,2,2,2,3,2,1,1,1,1,1,1,3,3,3,1,2,3,1,3,4,4,2,3,4,0,4,1,3,2,0,2,0,2,0,2,2,2,0,4,3,3,3,1,4,3,3,3,1,3,3,1,2,3,2,1,3,2,3,3,1,0,1,1,2,1,1,1,3,3,3,1,3,2,2,2,2,2,2,2,1,2,2,2,2,2,1,0,1,4,3,2,2,4,2,2,4,3,2,3,4,4,2,4,2,2,4,2,0,4,0,0,2,2,4,4,4,3,1,1,3,4,0,2,3,2,2,1,3,1,3,1,3,0,2,3,0,1,1,3,3,1,4,3,2,4,1,1,0,1,0,1,3,3,1,2,2,3,1,4,1,4,0,4,0,4,4,3,1,1,2,2,3,0,4,2,4,2,4,0,0,1,4,3,2,1,0,2,1,4,2,2,4,0,3,3,2,4,1,1,1,4,1,0,1,3,1,2,3,3,0,1,2,1,3,1,2,1,3,3,1,4,3,1,1,1,1,1,3,4,1,3,2,0,4,0,0,3,2,1,2,3,2,1,2,2,1,1,1,1,1,4,3,3,2,2,2,2,2,4,0,2,3,1,1,3,3,2,3,2,2,2,3,2,2,0,3,2,1,3,2,3,1,3,3,0,1,3,2,1,1,3,1,3,1,2,3,1,2,2,3,1,3,1,2,2,2,2,3,0,1,3,2,1,2,3,2,2,3,1,2,0,1,2,2,2,3,1,3,3,2,3,1,3,1,2,1,2,3,2,3,2,1,2,2,2,2,1,0,3,1,2,2,1,2,2,1,3,1,1,3,1,1,4,3,2,1,3,1,1,1,3,3,1,3,1,1,3,3,3,3,3,0,4,2,1,2,3,1,3,2,3,1,0,3,1,1,1,4,0,4,1,3,3,3,4,0,4,0,0,4,1,0,4,1,0,1,4,1,3,0,3,1,1,4,3,1,0,1,3,1,3,1,4,0,3,3,3,1,4,1,0,0,0,1,4,0,4,4,4,4,0,2,4,4,2,2,2,2,0,0,0,4,2,2,4,4,0,2,3,4,3,4,3,2,0,0,4,2,1,1,2,2,3,3,4,2,4,1,3,0,4,4,0,0,4,3,3,0,1,3,3,4,3,1,0,4,3,3,0,1,3,0,4,4,0,1,3,1,0,1,1,1,0,0,4,0,4,0,2,0,2,4,2,2,4,0,2,4,0,4,0,2,4,4,4,3,3,2,2,1,1,2,2,2,3,3,0,0,1,3,0,1,0,2,1,2,2,1,1,2,4,2,2,3,2,1,1,2,2,0,4,1,0,2,3,2,2,3,0,1,0,1,3,1,1,2,2,4,1,3,2,3,2,0,2,1,0,3,3,3,1,0,1,3,2,2,3,3,2,1,3,1,2,1,1,1,0,1,2,1,3,2,1,4,2,2,3,2,2,2,2,1,2,3,3,3,4,2,3,0,1,1,1,2,1,2,0,0,4,2,2,2,2,3,3,4,3,4,3,1,2,4,0,2,4,2,0,1,2,4,3,0,3,1,4,0,3,3,0,2,3,4,3,4,4,4,0,1,2,2,0,4,2,0,0,3,0,4,4,3,1,2,0,3,0,1,3,3,3,4,2,1,2,4,3,2,4,0,0,2,3,3,4,2,1,1,4,3,0,2,1,2,1,0,3,1,1,1,1,2,4,1,0,0,1,4,0,0,0,0,0,0,2,3,1,3,4,1,4,4,1,0,2,1,1,3,2,4,1,0,0,3,0,3,3,4,3,4,4,4,4,1,4,0,3,0,3,1,2,1,4,0,3,3,3,0,4,3,4,3,1,1,0,1,0,4,3,4,2,1,0,0,2,3,1,2,0,2,4,0,1,2,0,2,4,2,2,2,0,4,0,2,4,2,4,0,0,0,0,2,0,0,4,4,0,2,4,4,0,0,4,4,4,4,4,0,4,3,4,4,4,3,4,1,0,0,2,2,2,4,4,3,2,4,4,4,3,4,1,0,0,0,0,1,4,0,3,0,0,0,1,1,4,4,0,4,0,4,4,1,1,0,4,0,1,3,4,1,4,1,4,4,1,0,0,4,3,4,4,0,0,3,4,4,1,0,0,0,0,3,1,1,0,4,4,0,0,3,1,3,0,1,3,3,3,2,0,2,2,0,3,2,3,0,1,3,0,4,1,2,2,2,2,2,0,3,1,0,0,0,1,4,0,4,1,1,1,4,0,4,0,2,4,1,3,1,1,0,3,4,4,4,4,4,1,0,4,0,4,0,0,0,4,0,1,0,4,4,0,4,4,0,4,1,1,1,0,1,3,3,3,3,3,2,2,2,2,3,1,3,2,2,1,3,1,2,1,4,3,4,1,0,0,0,4,4,0,0,0,1,1,3,1,4,0,3,4,1,0,3,4,1,4,1,3,3,0,0,1,0,0,0,4,4,4,1,1,1,3,3,0,2,2,3,3,3,4,4,4,4,4,3,0,3,4,4,3,1,4,3,0,1,0,1,1,3,3,1,0,3,3,4,3,1,4,3,1,0,1,1,0,1,3,0,1,1,1,1,0,4,0,0,3,3,4,1,4,1,3,1,1,0,3,4,0,3,4,4,4,4,4,0,2,4,3,4,3,1,0,3,2,2,3,3,1,0,3,1,0,4,1,3,3,4,4,4,1,4,3,0,3,4,0,4,1,4,0,0,3,1,0,4,0,0,3,4,1,1,0,0,0,4,4,4,1,3,3,0,4,0,3,1,1,3,0,3,1,0,1,0,0,3,1,0,0,0,1,2,0,4,0,0,3,4,0,2,3,3,3,2,1,4,2,4,4,0,0,4,4,0,3,4,0,1,2,0,4,4,0,4,0,1,3,0,3,3,3,4,1,4,0,2,0,4,2,4,4,3,1,0,0,4,0,0,0,4,0,3,3,4,2,1,2,2,4,0,0,3,1,1,0,2,2,1,1,4,3,1,1,1,1,4,3,3,1,1,1,3,1,4,3,4,0,1,1,0,1,3,1,0,4,3,0,1,1,3,4,0,0,4,2,0,1,3,2,3,0,3,3,4,3,3,2,3,1,4,0,1,1,2,4,0,1,4,3,0,4,4,3,0,0,1,1,3,1,1,2,4,1,0,2,0,3,2,3,1,1,0,0,3,3,1,3,1,1,1,0,4,4,0,2,1,2,1,1,3,1,3,1,1,3,1,3,3,0,1,3,2,3,4,4,3,2,0,1,1,4,4,2,1,0,3,3,4,2,1,4,0,2,1,0,3,2,3,4,3,1,3,3,1,0,1,3,4,2,1,1,1,4,0,1,1,2,3,3,2,3,1,3,1,3,1,1,3,1,1,3,1,3,1,3,0,3,1,3,1,3,3,1,0,2,3,2,0,0,3,4,1,4,4,0,3,1,3,1,3,2,3,3,0,2,3,3,1,1,3,0,3,3,2,1,4,4,0,4,4,3,3,0,0,1,1,0,3,0,3,3,1,3,1,4,3,1,0,0,0,4,0,3,0,3,1,0,2,0,0,3,1,4,0,3,2,1,4,1,2,3,2,3,1,1,3,1,0,3,1,1,3,0,1,2,1,3,3,1,1,3,3,0,1,1,0,0,1,3,0,2,3,3,3,3,3,0,4,3,2,4,2,1,3,3,2,1,3,1,3,4,1,1,4,3,1,4,2,0,3,1,3,4,1,1,1,3,4,1,3,1,1,2,3,3,1,3,1,1,3,0,0,1,1,2,3,1,1,4,2,1,1,1,2,0,1,2,4,1,0,1,4,4,0,3,4,1,2,0,0,1,2,2,4,1,3,3,2,1,2,3,1,4,3,1,4,0,1,4,1,1,1,1,0,4,1,0,0,3,1,4,1,1,2,3,0,1,0,0,3,3,1,2,2,1,2,3,0,1,4,3,1,3,1,0,1,3,2,3,0,4,3,1,3,0,3,3,4,1,1,0,0,1,1,3,4,2,3,0,0,1,1,3,0,0,4,1,3,1,3,0,3,4,2,0,4,4,0,1,4,2,4,3,4,0,2,1,0,0,1,4,4,0,0,4,4,0,0,4,4,0,2,4,2,2,0,1,4,2,0,0,0,4,0,4,4,0,0,0,4,4,4,0,0,0,4,1,1,1,4,0,4,4,4,4,3,3,2,4,3,1,4,0,4,0,4,4,4,0,4,1,0,1,3,1,3,3,3,4,3,0,1,1,4,1,3,1,1,4,3,1,1,1,4,4,1,1,3,1,0,1,1,3,1,4,0,1,1,1,0,1,3,3,0,0,1,0,4,4,1,3,3,1,3,4,4,3,2,0,4,0,2,0,4,3,1,0,1,1,4,1,2,1,1,1,1,1,0,3,3,1,1,3,0,4,1,1,1,3,1,1,0,3,3,3,0,3,1,1,1,4,2,4,4,3,3,3,1,3,1,3,1,1,4,3,2,4,1,1,4,0,4,0,2,1,1,0,4,0,0,0,0,4,0,0,0,4,0,4,4,0,0,0,0,4,0,4,4,4,0,0,0,0,4,0,4,4,0,4,4,0,4,4,4,0,4,0,0,0,4,4,4,0,4,0,0,4,4,0,4,0,4,0,4,0,1,3,3,3,1,3,0,0,2,3,2,4,0,3,3,1,3,3,0,1,1,4,0,0,1,0,4,3,4,1,3,1,2,3,4,4,2,1,1,3,3,3,0,3,3,2,4,3,1,1,2,2,3,1,3,3,1,1,1,3,3,0,4,1,1,1,1,3,3,1,3,1,3,0,3,3,4,3,0,1,1,4,3,3,0,0,3,2,3,0,1,1,3,4,3,0,3,4,3,4,3,0,1,3,0,3,2,0,1,1,2,3,4,4,1,0,3,2,0,4,3,1,0,4,0,4,3,3,4,4,4,4,4,3,3,1,1,4,1,1,3,1,4,4,3,3,1,4,1,0,3,0,3,3,4,2,0,3,3,0,1,0,2,4,1,4,0,3,0,0,1,3,0,1,1,0,4,0,1,3,1,4,1,2,1,3,3,3,2,3,3,4,4,1,1,0,4,1,0,1,4,0,1,3,1,0,2,0,1,3,3,4,4,0,1,4,4,3,4,3,3,3,4,4,1,1,1,1,3,1,3,0,1,1,4,1,1,4,3,3,3,0,1,4,1,1,4,3,3,0,3,1,0,0,1,3,1,4,3,4,3,2,4,3,4,3,0,1,0,0,1,1,4,3,1,0,0,1,1,4,2,1,4,3,4,4,1,4,3,0,3,3,4,3,2,0,0,3,1,3,2,3,2,1,3,3,4,1,0,1,1,4,3,0,3,3,4,1,3,1,2,3,3,3,3,3,1,0,0,1,0,4,4,1,0,3,2,0,4,0,0,0,4,0,2,4,4,3,4,4,1,4,3,0,0,0,0,4,0,0,3,1,4,1,3,4,0,1,0,1,2,3,3,3,3,1,3,4,1,0,0,3,0,1,2,4,1,3,3,0,1,4,3,3,4,0,1,3,3,2,1,4,2,0,2,4,0,2,4,0,3,1,4,3,3,3,1,1,0,4,1,3,0,1,3,4,4,4,4,4,1,4,0,2,0,0,4,4,4,3,4,3,0,4,3,1,1,0,0,0,4,4,0,4,4,0,3,4,1,0,0,1,2,4,3,4,0,1,1,4,3,2,1,4,0,3,3,0,4,1,0,0,0,4,0,0,3,3,1,4,2,0,3,4,1,1,0,4,4,4,4,4,0,3,4,0,4,4,2,4,4,0,0,1,3,4,3,3,3,2,1,3,4,3,1,0,0,0,3,4,4,3,2,3,4,3,1,4,1,2,3,0,0,4,0,0,1,0,0,4,4,1,0,2,0,1,4,0,3,3,3,0,1,1,4,4,1,3,0,0,4,3,0,4,3,4,4,0,3,1,1,4,2,2,0,3,3,4,1,2,4,0,2,3,0,1,1,1,4,4,0,0,0,1,3,3,3,3,3,2,4,0,4,0,0,1,1,4,0,0,0,0,1,4,3,2,3,4,3,1,0,4,4,1,3,0,3,4,4,2,4,0,3,0,3,2,1,4,0,4,1,3,3,0,0,3,0,0,0,1,1,1,3,3,3,1,0,0,2,4,1,4,4,3,2,4,3,0,1,2,4,2,3,1,3,4,4,1,1,2,3,1,2,1,3,3,3,3,3,1,2,4,3,0,4,1,2,2,4,4,4,1,4,0,4,1,3,0,4,1,0,4,4,0,0,0,1,1,3,0,3,4,2,3,4,0,4,0,1,4,2,1,0,1,0,1,4,0,0,3,3,1,2,1,3,1,1,3,3,4,4,1,3,1,3,1,1,1,4,4,3,4,0,3,0,0,3,4,4,4,4,4,4,0,3,3,3,3,3,1,4,0,0,4,0,4,0,4,0,0,0,4,4,0,2,3,1,4,0,4,4,0,4,4,3,2,0,3,1,3,4,0,3,0,1,3,0,1,1,1,1,1,1,1,3,3,1,3,1,4,3,1,2,3,3,2,2,3,1,1,2,3,1,1,2,1,1,3,2,1,1,0,0,3,2,0,0,0,4,4,1,4,1,1,0,2,1,4,2,4,3,3,4,0,2,3,2,4,2,2,3,4,3,1,3,0,4,0,1,1,4,0,1,3,2,0,4,4,3,4,2,2,4,0,4,4,0,0,1,0,0,0,4,3,3,1,0,1,3,0,4,4,2,0,0,3,4,0,4,4,1,3,1,0,1,1,4,0,1,3,0,1,0,1,0,3,2,4,2,0,2,2,2,0,0,4,4,2,3,2,1,1,3,4,4,4,1,1,3,1,4,1,4,1,1,0,1,3,0,3,3,0,1,2,2,4,3,2,3,3,1,2,2,1,2,1,3,2,3,1,2,1,1,0,2,1,1,0,0,1,0,3,3,0,1,1,1,3,2,1,4,1,4,3,4,4,0,4,0,0,3,3,0,1,3,3,3,3,1,4,4,3,2,1,0,2,1,2,0,1,2,1,2,4,0,3,3,0,1,4,3,1,0,1,3,1,0,3,3,1,4,3,1,3,1,2,4,3,0,2,2,1,2,3,1,3,2,3,1,1,1,1,0,3,2,3,4,0,2,2,1,3,1,3,4,3,3,0,1,4,0,3,3,0,1,1,1,3,4,0,4,0,4,4,1,1,4,3,0,1,0,3,4,0,4,1,3,1,0,3,3,1,0,1,4,0,1,1,0,4,2,4,4,3,4,4,1,0,0,2,4,4,3,2,2,3,2,2,1,3,2,3,4,2,2,1,1,2,0,1,3,1,4,4,4,2,1,1,3,1,3,4,0,4,2,1,4,1,4,1,3,3,1,3,3,0,3,2,2,3,4,1,4,3,1,0,3,2,2,3,2,3,1,2,2,3,2,0,2,4,3,3,1,4,2,0,4,2,1,2,3,2,2,2,3,1,4,4,2,1,4,4,1,2,1,2,1,2,3,1,1,2,2,4,4,0,0,4,1,0,0,3,0,0,4,3,0,1,1,0,0,0,3,0,1,4,4,4,0,4,3,4,1,4,1,0,0,1,1,1,3,0,1,4,0,4,0,4,0,4,3,1,3,0,4,4,1,2,4,4,4,0,4,4,4,0,0,0,0,4,4,4,0,3,1,0,1,0,1,0,0,3,0,4,3,0,3,4,4,0,0,0,0,0,0,3,2,0,3,2,4,1,0,0,1,2,0,3,1,3,0,1,2,1,3,1,3,3,1,2,1,3,0,2,0,3,0,2,4,1,1,2,2,0,0,3,2,0,0,2,4,4,0,1,0,0,3,1,0,3,3,1,2,4,1,1,4,4,3,2,0,0,0,1,0,3,4,0,0,1,4,4,0,1,0,3,0,0,2,4,4,2,4,4,0,3,0,4,1,3,0,0,4,4,1,1,4,3,4,4,1,0,4,1,1,1,4,4,2,2,1,4,1,3,1,0,4,0,2,1,3,4,0,1,4,4,1,2,1,2,0,3,2,2,0,2,3,0,1,1,4,0,4,4,0,0,1,4,2,0,2,4,2,0,1,4,2,0,2,4,4,1,0,1,3,4,4,2,0,3,3,4,2,0,1,0,1,4,4,3,3,4,0,4,4,3,3,2,4,0,3,0,4,0,1,2,4,4,0,4,0,2,4,2,2,0,4,0,1,0,2,1,3,4,4,1,4,0,4,0,1,0,0,4,4,0,4,1,0,4,0,4,0,4,2,4,1,4,3,4,4,0,1,2,2,4,0,0,3,4,3,1,3,4,4,3,0,3,2,1,3,2,1,2,2,3,0,3,3,4,3,1,3,3,2,4,1,1,3,1,2,3,4,4,1,0,1,0,4,4,3,4,0,4,0,1,2,0,0,1,2,1,3,3,2,4,2,2,3,3,0,0,1,3,0,0,3,2,1,1,3,1,3,3,3,1,3,1,0,4,4,2,3,1,2,0,2,1,1,4,4,4,1,1,1,1,0,0,4,1,2,0,1,1,2,4,2,1,3,4,4,3,4,4,4,2,2,3,4,4,0,1,1,1,3,2,2,4,0,3,0,4,1,1,0,3,3,2,2,2,4,4,0,0,1,0,0,1,3,3,3,1,0,4,1,3,3,4,4,3,1,3,3,2,3,0,1,1,4,2,1,4,1,1,2,1,0,0,3,0,2,0,3,1,2,3,2,1,3,4,2,1,1,3,4,4,2,1,2,4,3,0,4,0,1,2,1,1,2,0,3,2,1,1,1,2,4,3,2,3,3,3,2,3,3,2,2,2,3,1,3,1,1,3,4,3,3,3,0,0,1,3,1,2,2,3,2,2,1,1,3,0,2,1,1,1,3,3,1,0,1,2,3,3,3,1,1,2,2,1,3,4,3,2,0,3,3,4,4,1,3,1,3,3,0,3,3,3,2,4,2,4,4,2,3,1,1,1,3,4,0,1,4,2,3,1,4,3,1,3,1,3,0,1,2,3,1,3,2,3,3,2,4,1,3,2,3,0,4,3,1,2,1,2,3,2,0,1,3,2,1,1,3,3,3,2,3,2,1,3,4,1,4,2,0,4,0,1,2,3,2,3,1,3,3,2,4,1,1,1,1,3,3,3,1,3,2,1,3,3,1,3,4,3,3,1,3,1,2,2,3,1,2,1,3,2,1,1,4,1,3,2,3,1,3,2,1,0,1,2,1,1,2,3,2,0,3,1,2,2,3,3,2,3,1,3,1,1,3,3,2,1,3,2,3,2,3,3,1,1,1,3,1,3,3,3,3,1,2,1,1,3,3,3,2,3,1,1,3,3,3,3,1,1,3,2,3,3,1,3,2,1,3,2,2,3,1,3,2,1,2,4,1,3,2,2,2,3,2,2,3,3,1,1,2,2,3,1,3,3,1,2,1,3,3,1,1,4,2,3,1,3,4,2,2,0,2,2,1,2,2,1,1,2,3,1,2,2,2,3,2,2,2,4,1,2,2,1,1,1,2,2,0,2,2,2,1,0,1,0,1,4,2,4,1,0,1,3,4,2,1,1,3,4,4,3,1,3,2,3,0,0,3,3,2,3,3,3,3,2,2,3,1,2,3,2,3,3,2,4,3,0,1,3,2,3,0,2,2,4,3,0,0,0,3,3,3,4,3,1,0,4,2,4,1,1,1,4,3,0,0,1,3,1,0,1,0,1,2,0,1,2,1,1,3,4,3,0,2,1,1,4,0,4,0,1,0,3,3,3,2,1,2,1,0,0,3,1,3,1,3,4,3,1,4,3,0,0,0,4,0,3,4,2,2,2,2,0,0,3,0,0,1,1,0,2,3,4,0,3,0,3,3,3,4,0,3,1,4,1,2,2,3,3,4,0,4,4,0,0,4,4,0,2,0,3,0,0,4,3,0,1,2,0,0,2,0,2,0,4,0,3,0,0,1,4,3,4,0,4,4,0,2,4,2,3,0,1,0,2,3,4,3,1,4,1,2,3,3,3,1,3,3,1,3,1,3,3,1,3,3,3,2,1,1,1,1,3,1,0,1,2,1,2,2,0,2,3,3,4,3,2,4,3,1,1,0,1,2,3,4,0,3,2,3,0,3,2,2,3,1,4,1,0,0,2,3,4,1,3,3,0,4,0,4,3,2,0,3,3,2,2,3,1,0,4,1,4,4,1,1,3,4,4,1,0,3,3,4,1,1,2,0,0,0,2,3,1,0,2,4,4,0,0,0,2,2,2,2,2,4,2,2,4,2,2,2,2,2,4,0,2,0,4,2,2,4,2,2,2,4,2,4,2,2,0,2,2,2,4,2,2,2,0,2,0,4,2,0,4,2,1,2,4,1,0,0,2,1,3,1,3,4,2,4,4,4,4,4,4,2,0,0,4,0,2,4,2,2,2,0,1,3,3,4,1,1,2,4,0,4,2,4,4,2,4,1,0,3,4,1,1,1,0,0,1,3,0,1,4,1,1,2,3,3,4,4,0,0,2,2,1,3,3,4,4,3,0,1,2,1,1,3,3,1,3,3,1,3,3,1,4,1,1,2,1,1,1,1,3,1,2,3,3,3,2,3,3,3,1,1,2,1,3,1,2,1,1,3,2,1,3,1,2,2,3,1,0,3,3,4,2,4,3,2,1,1,1,1,0,1,1,3,2,2,1,3,2,2,2,2,1,3,3,3,2,1,2,3,2,2,2,2,2,2,2,2,1,2,2,1,1,1,2,2,2,3,2,2,3,0,2,2,4,2,4,2,2,2,2,3,2,4,2,2,2,2,2,2,2,2,2,2,3,2,2,2,2,2,2,1,2,3,2,2,2,1,2,2,2,2,2,2,2,2,2,2,2,2,2,2,2,1,2,1,2,1,2,2,2,2,2,2,1,0,2,2,2,2,2,2,2,2,2,2,3,2,2,2,2,2,2,2,2,2,2,2,2,2,2,2,1,2,2,2,2,2,2,2,2,2,1,2,2,2,2,1,2,2,2,2,2,2,2,2,2,2,2,1,2,2,2,2,2,2,2,2,2,1,2,3,2,2,3,2,1,1,0,0,2,1,1,3,2,1,1,3,3,3,2,3,1,2,3,3,3,1,1,4,2,3,0,1,1,3,1,4,1,1,1,2,2,2,1,0,1,2,1,0,3,3,2,0,4,2,1,3,1,1,2,3,2,3,1,2,1,3,1,3,1,3,3,0,3,2,4,0,4,1,1,1,3,0,4,2,2,3,3,2,1,0,2,0,0,1,2,1,2,1,1,2,0,2,2,4,3,2,3,0,2,0,3,1,2,4,1,2,4,3,4,1,0,4,3,4,1,3,0,0,0,1,1,2,0,2,2,0,1,2,4,4,0,4,0,0,4,0,3,3,4,0,1,1,3,3,1,0,0,3,2,0,3,1,3,3,3,4,4,0,4,4,3,2,0,2,4,2,3,1,4,1,0,1,1,1,1,2,1,0,0,4,4,1,0,2,2,2,2,2,4,4,4,4,1,4,0,3,2,4,1,0,0,1,2,2,1,1,3,1,3,1,1,0,4,1,0,1,2,4,4,0,0,0,1,4,4,2,4,3,3,1,3,3,1,3,1,4,3,1,1,1,3,3,1,4,0,0,1,3,0,3,4,4,4,1,3,4,0,4,0,2,3,2,0,0,4,3,1,0,3,2,4,1,1,3,1,1,4,3,1,1,0,1,4,4,3,3,3,1,2,4,2,1,2,3,1,3,2,1,2,0,1,4,4,1,4,3,1,3,4,2,1,4,4,3,4,1,2,1,0,1,1,4,4,0,2,4,4,0,2,0,3,0,2,4,3,4,0,3,0,4,2,1,3,0,0,0,0,0,4,4,0,4,0,0,0,4,1,3,0,3,3,0,3,4,4,0,0,4,1,3,4,0,1,1,1,4,3,0,0,3,1,4,0,0,1,1,0,1,3,1,1,1,4,2,2,1,2,1,2,3,3,3,2,3,3,3,2,4,2,2,2,0,0,1,4,0,2,3,1,1,2,0,1,3,2,2,2,1,0,3,2,2,1,0,0,0,1,4,1,3,0,1,2,2,2,2,2,0,2,2,4,0,2,2,2,2,0,0,0,4,3,2,4,4,0,0,4,4,0,0,0,4,4,0,1,4,4,3,0,0,1,3,3,1,1,3,1,1,4,0,2,2,0,1,1,0,1,3,1,1,2,0,0,0,3,2,3,2,3,4,2,1,2,0,0,1,1,0,1,3,0,3,1,1,3,4,0,1,3,2,4,2,2,1,0,3,0,1,1,0,2,3,1,1,2,0,1,1,2,4,0,2,3,0,1,0,1,4,3,1,1,1,3,1,1,2,3,2,3,2,2,3,3,1,3,0,1,3,3,2,2,3,1,1,0,1,3,0,2,3,1,0,0,4,4,3,2,0,2,4,4,2,1,4,2,2,1,4,2,1,2,2,0,4,2,2,2,4,2,3,0,3,4,3,3,1,2,2,3,2,0,3,3,1,2,4,3,2,2,2,1,3,4,4,0,0,1,2,4,2,4,0,3,3,2,3,4,1,3,3,1,4,3,1,3,3,2,4,3,4,1,1,3,4,3,0,4,0,3,4,4,3,4,4,0,0,1,1,3,3,2,2,2,0,2,3,3,4,0,3,3,0,3,3,1,1,0,3,3,3,1,1,3,4,4,1,1,2,3,2,4,3,2,4,2,2,0,4,2,2,2,4,2,4,1,3,3,2,3,3,3,0,4,0,0,3,0,4,0,1,1,2,2,3,2,4,3,2,2,2,1,1,1,3,2,2,0,3,3,1,0,1,1,4,0,0,2,0,0,0,1,1,3,0,3,3,2,4,4,1,4,1,4,0,2,2,2,0,2,4,4,2,4,3,0,0,3,2,4,0,1,4,0,4,0,3,0,4,2,2,2,2,4,1,1,4,4,1,0,4,2,0,0,2,4,4,4,3,4,0,0,4,4,3,2,2,1,2,2,3,2,1,2,4,3,2,2,2,2,4,0,4,0,4,2,4,2,2,4,2,3,1,1,3,0,1,3,0,2,1,3,3,2,3,0,3,1,1,3,0,4,2,2,4,2,2,4,2,2,2,0,4,4,0,2,4,2,1,3,2,1,2,3,1,4,1,0,1,1,3,2,3,3,3,3,3,4,3,1,3,3,2,2,3,1,0,0,2,2,1,3,3,3,0,1,2,1,1,3,2,4,2,1,0,3,1,2,3,4,1,2,2,0,3,0,3,4,4,1,2,3,1,1,1,3,4,0,4,4,1,1,2,1,3,3,0,1,2,1,4,4,3,4,4,0,4,0,3,0,3,4,0,0,0,4,0,0,3,3,3,2,1,3,4,0,1,1,2,3,2,2,2,2,2,3,1,2,2,3,2,2,4,0,2,0,2,2,3,0,1,1,2,4,0,3,3,1,1,1,1,3,2,2,1,4,1,3,3,1,3,4,0,1,1,2,1,3,1,3,3,2,1,2,1,3,1,4,2,3,1,0,1,0,3,1,0,0,3,1,1,0,4,1,0,0,1,3,1,4,0,0,1,2,3,1,1,2,0,0,0,2,1,4,1,4,3,2,1,3,0,1,1,1,2,4,2,1,0,1,1,4,2,4,3,4,1,3,3,2,2,3,3,1,0,4,4,4,2,3,4,2,1,3,1,1,3,1,0,1,3,0,3,3,3,4,3,3,1,1,4,2,1,1,1,3,4,3,2,1,2,4,4,2,2,2,2,1,1,4,0,4,3,3,0,4,4,0,0,4,0,0,4,0,0,4,0,0,4,4,0,4,4,4,4,4,0,0,4,0,1,4,4,3,1,2,3,0,1,3,2,1,2,0,4,2,2,2,2,2,3,1,3,2,4,3,1,4,2,1,1,0,1,1,4,0,4,0,3,0,2,1,3,2,3,4,3,3,2,4,1,0,2,3,0,3,1,2,0,1,2,1,0,4,2,2,3,1,2,1,2,2,2,2,2,2,1,1,3,1,1,4,4,1,0,1,2,1,3,3,4,3,1,3,3,3,1,2,1,2,2,2,2,3,2,2,2,1,2,1,1,3,2,3,2,1,3,3,2,2,2,2,2,2,2,2,2,2,1,1,3,1,1,1,1,1,3,1,3,3,3,1,1,3,1,1,3,3,3,1,2,2,2,1,2,2,2,2,1,1,3,1,1,2,3,2,3,1,3,4,1,0,1,3,3,3,1,3,3,3,3,2,3,3,3,1,4,1,1,1,3,3,1,1,1,3,2,2,2,2,1,2,2,2,2,2,1,1,1,4,0,0,0,1,3,2,1,1,3,3,1,1,1,3,3,2,3,3,2,1,3,1,1,3,1,3,1,3,1,2,1,2,2,1,1,2,3,4,2,2,1,2,2,0,3,3,1,2,1,0,4,0,2,4,4,4,3,4,2,4,0,0,2,2,4,4,1,4,3,2,2,0,1,3,1,1,3,1,2,3,4,1,2,1,2,1,2,1,1,3,3,2,3,1,3,3,1,1,2,3,2,3,3,2,1,3,2,3,4,1,1,2,1,1,2,2,1,4,1,1,3,3,2,3,1,1,3,1,1,1,2,1,3,0,1,3,1,2,3,3,3,3,3,2,1,2,2,3,1,2,3,1,1,1,3,2,0,2,0,4,1,1,1,2,3,1,3,3,2,4,4,4,1,2,3,3,2,2,4,3,2,2,2,2,3,1,1,2,2,2,4,2,2,2,0,2,2,2,3,2,2,2,2,2,2,2,2,2,4,3,2,2,2,2,3,2,2,2,2,2,4,2,4,2,2,2,2,2,0,4,4,4,2,2,2,1,1,4,1,2,2,0,2,1,3,2,2,2,2,2,1,2,4,2,2,2,2,2,2,1,3,2,2,0,3,2,1,2,2,2,1,3,1,2,2,2,2,3,0,2,2,1,1,2,1,3,2,0,2,2,4,4,2,2,4,2,2,3,4,4,0,2,2,4,2,0,2,4,4,0,0,0,4,0,0,2,4,0,2,2,0,4,4,0,0,0,0,2,0,0,4,3,3,0,2,0,2,0,0,0,4,4,1,2,2,2,2,3,2,2,0,3,4,4,0,2,4,2,0,2,1,1,2,2,1,0,3,2,0,3,0,4,2,4,0,2,0,4,2,4,2,2,0,3,2,2,1,1,2,4,0,3,1,0,3,0,3,0,1,3,0,0,1,1,2,1,1,2,2,3,4,2,0,2,1,2,2,0,1,4,0,4,0,2,3,2,3,0,2,1,3,0,3,4,3,4,2,1,1,2,2,3,1,2,0,1,0,1,0,1,3,1,3,2,4,4,1,2,0,0,3,0,3,0,2,3,3,4,4,0,0,3,1,3,3,3,1,3,1,3,3,3,3,1,3,1,3,2,3,4,0,0,1,3,3,2,2,2,1,0,1,3,4,4,0,0,2,2,4,3,3,3,1,1,3,2,2,3,2,3,1,3,4,4,2,1,1,1,1,3,3,0,0,3,2,1,3,3,3,1,1,1,1,2,1,3,2,3,3,4,0,3,0,0,3,4,2,1,1,3,4,1,1,2,4,2,1,1,3,1,2,3,3,1,3,4,0,1,3,4,1,0,1,0,2,1,2,2,3,2,3,4,2,4,2,3,0,0,3,3,1,1,3,1,0,0,4,3,3,1,0,1,2,3,2,2,0,1,1,2,2,1,1,3,2,2,1,3,1,1,3,3,2,1,3,1,2,2,3,4,1,3,3,2,3,1,3,3,1,0,4,3,0,0,1,2,0,2,0,0,2,4,4,2,1,0,3,3,4,1,2,2,3,2,3,3,0,4,1,2,1,0,3,1,2,2,3,0,4,4,4,2,1,4,3,4,4,4,2,4,0,2,4,1,3,1,2,0,2,2,1,4,0,4,4,3,1,1,0,4,4,1,4,2,0,1,2,0,2,0,1,3,1,1,4,3,1,3,4,0,0,1,4,0,0,3,3,2,1,3,4,4,1,0,3,1,4,0,4,3,4,4,4,4,0,1,1,1,3,1,1,0,1,0,3,1,2,2,3,1,3,0,1,4,4,3,1,1,3,3,3,1,4,2,3,1,3,1,3,1,1,1,0,4,1,2,3,2,4,2,0,2,4,3,1,3,3,2,1,0,2,1,2,4,1,1,2,0,0,0,2,2,2,3,0,1,0,2,2,4,2,2,2,2,2,2,2,2,3,2,3,2,2,2,2,2,1,2,2,2,2,2,2,4,2,1,2,2,2,2,2,3,2,2,2,2,3,2,2,3,3,1,2,0,4,0,0,4,2,2,2,2,2,2,2,4,2,2,2,0,0,0,2,2,2,2,2,0,2,2,2,2,4,2,2,2,2,2,2,2,2,2,2,2,2,0,1,2,2,2,1,2,2,3,2,0,3,0,1,0,3,2,3,1,2,1,1,2,2,1,3,1,2,2,0,2,2,2,2,2,2,2,4,2,2,4,0,2,2,2,2,2,2,2,2,2,2,2,2,2,2,2,2,2,4,2,2,3,1,1,1,4,0,0,3,4,2,1,3,2,3,1,2,4,3,2,0,4,4,4,4,2,2,1,4,0,4,2,4,0,0,1,2,0,2,2,4,4,1,4,0,0,0,4,4,0,2,1,1,2,4,4,0,2,1,4,4,4,0,4,4,4,1,0,4,3,3,0,4,4,0,2,4,4,1,1,1,3,4,1,3,1,0,4,0,4,3,1,2,2,4,3,3,4,3,0,1,4,1,3,2,4,2,1,0,1,4,0,1,2,2,2,3,2,1,1,3,4,3,0,3,0,4,2,3,2,2,2,0,2,2,0,4,4,0,4,1,0,4,2,2,1,4,2,4,4,0,1,1,0,3,3,4,3,0,3,4,3,0,3,3,2,3,0,2,4,4,3,0,0,4,4,4,3,3,1,0,3,4,3,0,4,3,2,4,3,3,1,3,0,0,3,1,0,1,4,4,0,1,4,0,0,1,2,3,3,3,2,4,1,2,2,3,3,4,2,3,1,3,3,1,2,3,0,3,0,4,1,3,3,4,0,3,0,0,0,3,0,0,4,3,3,0,0,0,4,4,4,0,4,0,4,0,0,4,0,0,4,4,0,1,0,0,4,4,0,0,1,3,0,4,4,4,4,0,4,0,4,3,0,0,0,0,4,3,2,0,4,4,0,1,2,4,1,0,4,1,1,4,0,0,2,2,2,2,2,3,0,2,0,3,3,1,4,4,0,3,0,3,0,3,4,0,0,0,4,2,4,3,4,0,1,4,4,3,3,4,3,0,2,4,4,3,4,1,4,3,4,2,2,0,2,0,3,4,2,1,4,4,1,3,0,1,3,0,3,1,1,1,3,1,3,3,3,3,1,3,1,3,1,4,4,1,3,3,3,3,1,4,4,0,0,2,3,1,3,3,4,2,0,1,0,4,3,0,0,2,0,2,0,0,0,0,3,3,4,0,0,1,0,3,3,3,4,2,2,1,3,0,1,3,3,1,1,4,3,3,1,1,1,2,3,0,1,3,1,0,1,2,1,3,3,3,3,3,4,1,3,1,1,1,1,4,0,3,3,3,3,2,3,2,3,2,3,3,2,2,2,3,3,1,2,4,3,3,2,2,2,3,1,2,1,3,1,2,1,4,3,4,4,0,0,1,4,1,1,3,3,2,1,3,2,0,1,2,2,2,2,2,1,2,2,2,2,3,2,2,4,2,2,4,2,2,2,2,0,2,1,4,2,0,2,2,2,2,2,2,2,2,4,4,2,2,2,4,2,1,3,1,3,1,4,1,2,1,2,2,2,2,2,2,2,2,2,2,2,2,1,2,4,2,4,2,2,2,2,2,3,2,1,2,2,2,3,2,3,0,1,3,3,0,4,0,2,1,3,3,4,3,3,1,1,1,2,1,1,3,4,1,1,0,1,0,0,1,4,4,1,1,1,1,3,1,1,2,1,1,2,0,2,3,1,3,2,2,2,0,1,2,1,1,4,4,1,1,4,3,1,0,3,3,3,1,1,1,1,3,0,0,3,0,0,3,1,1,4,3,1,1,3,3,2,1,3,1,1,2,3,2,1,1,2,1,2,2,3,1,2,2,3,3,1,0,3,1,1,1,1,1,0,2,4,3,4,1,3,2,3,1,2,2,1,4,1,3,1,2,1,2,1,3,3,2,0,1,1,1,4,2,0,1,2,2,3,2,1,3,4,3,0,4,1,3,0,4,2,2,3,2,2,0,0,2,2,0,0,0,4,4,3,3,0,3,2,2,1,3,3,2,4,3,3,3,3,4,1,2,3,1,0,4,2,2,2,4,0,3,1,4,3,0,0,3,3,1,4,4,4,0,3,2,2,0,1,4,1,4,3,3,4,0,3,0,2,0,2,1,0,4,4,0,1,2,4,4,3,4,2,1,0,1,1,0,2,4,2,4,4,4,2,3,0,3,0,3,2,0,2,2,2,4,3,1,1,0,4,1,1,0,1,0,0,3,3,1,0,4,4,4,0,4,3,3,3,1,4,3,4,2,1,1,4,0,1,0,0,0,3,0,1,1,3,3,3,1,1,2,2,2,0,1,1,3,1,3
B118,1,1,1,4,4,0,4,4,3,1,2,2,3,1,0,3,1,0,0,4,4,0,1,0,0,3,0,2,4,3,1,1,3,4,3,1,4,1,4,1,1,3,1,0,1,1,3,1,4,4,3,2,2,2,3,2,1,0,0,4,3,1,4,0,2,2,0,1,2,2,3,4,4,0,2,2,1,2,0,0,3,2,3,1,2,2,2,2,4,2,2,2,2,4,2,4,2,2,2,4,2,0,4,2,2,2,0,2,2,2,2,4,0,2,4,0,2,2,0,0,2,0,2,2,4,0,2,3,4,4,1,2,3,0,3,1,1,1,3,0,3,0,1,2,3,1,2,3,1,2,4,0,1,1,3,2,1,0,1,2,3,4,0,4,1,3,3,1,3,2,1,1,4,3,2,3,4,3,1,2,1,3,0,4,0,4,0,2,2,1,3,0,1,3,3,0,1,3,2,2,0,4,1,0,2,1,4,3,2,1,1,0,2,3,1,1,3,3,0,2,2,1,3,1,3,1,1,0,0,0,4,1,2,3,2,3,3,3,4,3,3,3,0,2,0,2,1,1,2,0,0,1,3,3,2,3,1,1,3,1,3,1,3,3,3,2,3,3,3,1,3,3,2,1,4,4,1,3,1,3,4,0,0,4,4,4,4,0,3,2,0,1,4,4,0,0,4,2,2,1,1,1,0,1,0,1,4,4,3,4,3,0,3,4,3,1,2,1,0,2,4,4,1,0,2,0,4,1,4,2,2,0,2,2,4,0,4,2,4,4,0,2,4,4,2,4,0,3,4,1,3,4,0,3,2,0,1,3,0,2,1,2,3,2,1,3,1,3,2,4,2,1,0,4,3,3,1,2,1,4,3,1,1,3,4,3,3,0,0,1,0,4,3,0,2,0,1,3,0,3,1,4,0,0,1,1,1,1,2,4,1,0,1,0,0,1,4,3,4,1,1,3,1,1,3,1,4,0,2,2,2,3,4,4,1,2,4,4,3,4,4,1,1,3,1,3,0,3,1,0,0,2,1,3,2,2,1,1,3,2,3,3,3,2,3,1,1,3,1,1,2,3,2,3,3,1,1,1,1,3,2,1,2,1,1,2,0,1,1,0,1,1,1,3,2,3,2,1,3,1,1,2,0,1,4,2,2,1,3,1,3,3,1,3,2,3,1,3,3,2,2,3,3,1,1,1,3,1,1,3,1,1,2,3,4,1,3,2,2,4,4,3,3,0,3,0,2,2,4,2,3,0,3,1,1,0,4,3,4,3,4,1,3,1,0,2,2,2,3,2,2,0,3,0,3,1,1,1,2,1,2,1,2,1,3,1,3,3,2,2,1,1,2,1,4,1,1,0,4,0,0,1,2,4,1,3,1,2,2,3,2,1,0,0,0,3,1,2,2,1,2,0,1,3,3,1,3,2,2,1,4,4,3,4,1,3,1,3,0,1,0,0,3,3,1,1,1,1,3,2,1,1,3,3,1,1,1,1,3,2,0,3,4,1,4,3,3,3,2,2,2,2,2,2,4,1,1,2,2,1,2,4,2,3,1,4,3,3,2,2,3,3,3,3,2,3,2,2,1,2,2,2,1,1,1,3,3,3,1,3,0,3,4,1,1,4,3,0,3,3,1,3,2,2,3,1,3,2,1,2,3,1,2,1,3,0,2,2,3,4,1,1,2,0,4,2,1,3,1,0,2,2,3,2,1,1,4,3,1,3,2,2,4,3,3,2,3,0,3,3,0,4,4,1,2,0,4,3,2,1,2,1,2,2,2,3,3,3,1,4,2,1,3,3,2,1,2,0,3,1,4,2,3,1,3,0,4,0,3,1,3,4,3,3,4,3,0,1,2,2,4,0,2,3,1,2,0,0,4,0,1,0,1,3,1,1,4,0,4,3,3,3,1,4,1,3,0,4,0,1,1,3,3,3,2,1,4,2,1,1,4,4,0,1,1,4,0,0,1,4,0,4,4,4,0,4,4,4,0,2,0,2,2,3,2,3,1,2,2,4,2,4,1,0,1,3,3,2,1,1,2,2,2,4,3,1,4,2,3,1,0,1,3,2,1,3,2,1,4,3,0,2,2,3,1,4,2,4,3,4,1,2,4,4,4,2,2,2,0,2,2,1,2,2,0,3,2,4,4,1,2,2,4,2,0,2,2,3,2,1,3,2,4,3,3,2,2,1,0,3,4,3,4,3,2,3,4,2,4,0,4,2,4,2,2,0,1,2,4,1,2,2,1,0,1,0,3,3,2,2,4,3,0,3,2,1,1,0,3,0,2,0,0,1,1,2,2,0,3,4,0,2,3,1,4,2,3,3,3,2,2,1,0,1,1,0,1,4,3,4,3,4,1,0,3,3,1,3,0,4,1,4,4,3,3,4,3,3,1,3,4,3,0,1,1,3,4,0,1,2,0,1,3,1,3,4,1,1,4,1,2,0,0,4,1,4,2,4,3,3,3,2,0,1,3,3,1,3,4,1,0,4,3,2,4,1,2,0,3,4,1,2,1,1,3,1,1,3,3,1,4,4,1,3,1,1,1,3,4,3,3,0,1,4,4,0,4,1,3,3,4,0,2,0,1,1,3,4,2,1,1,4,4,4,0,4,0,2,4,0,4,0,4,0,3,4,0,2,4,4,1,3,2,3,1,0,3,0,0,3,3,1,0,1,0,3,4,4,3,3,3,1,1,4,4,0,0,0,0,2,2,2,2,2,4,4,0,0,0,2,4,2,2,4,2,2,2,2,4,4,1,2,4,1,3,4,2,1,1,1,3,1,2,4,1,1,0,3,1,4,0,3,0,3,0,0,1,0,4,4,0,1,0,0,4,0,4,3,1,4,3,0,1,2,0,1,1,0,1,0,1,1,1,1,3,0,4,4,0,3,1,2,1,1,0,4,0,2,0,4,1,3,0,2,3,3,3,0,4,1,1,0,1,0,3,2,3,4,4,1,1,0,1,1,2,4,1,3,0,4,1,1,1,3,0,0,1,2,2,2,4,2,0,4,4,2,4,0,2,4,2,2,0,2,2,2,3,2,2,2,4,2,3,2,4,3,3,2,2,2,0,3,0,4,3,2,3,0,0,3,4,4,1,4,4,4,2,0,2,2,4,1,3,4,4,3,1,2,0,4,4,3,0,3,4,1,0,3,3,1,3,3,0,0,4,0,3,0,3,4,0,3,3,4,3,1,3,3,1,1,1,2,1,3,1,1,1,0,2,2,0,4,3,3,2,4,0,3,2,4,3,0,4,4,4,0,3,0,1,1,2,2,0,4,0,3,4,0,4,4,3,4,2,0,2,2,1,3,1,2,1,1,3,4,4,0,0,4,0,0,1,4,0,1,3,4,3,4,2,3,1,4,3,0,1,4,0,1,4,1,1,4,0,2,1,1,1,1,0,3,2,2,4,1,1,1,2,3,1,1,1,1,4,1,2,2,3,0,4,0,3,0,0,0,0,0,4,3,4,3,0,2,2,2,2,2,2,3,3,2,3,1,1,1,2,2,3,2,3,3,1,1,0,1,2,1,3,3,3,1,3,3,2,2,1,1,1,3,2,2,2,0,2,1,3,0,1,3,4,1,1,2,1,3,1,1,0,3,4,4,2,1,3,3,2,4,3,1,3,3,2,3,2,1,2,1,3,1,3,2,1,1,3,1,4,3,3,1,0,1,3,0,3,0,0,1,3,0,1,1,2,3,2,3,2,1,3,4,1,1,1,2,1,2,1,4,0,3,0,4,3,1,1,1,3,4,1,0,3,3,1,4,0,2,0,2,0,4,4,4,1,2,4,2,1,2,0,0,4,2,0,2,0,4,4,0,1,0,0,0,2,3,2,3,0,4,3,1,4,1,1,2,4,4,1,4,1,4,4,2,1,2,2,3,0,0,3,1,0,2,2,3,3,0,2,2,3,2,4,1,0,2,0,3,3,4,3,1,0,3,0,4,2,1,4,4,1,2,3,4,0,3,4,4,2,0,3,3,4,3,4,0,0,3,4,2,1,3,0,4,1,0,0,0,4,2,2,0,1,0,0,1,4,4,2,4,4,1,1,2,1,4,2,2,4,0,2,2,2,0,4,2,4,4,2,4,2,4,2,2,2,4,4,2,4,2,2,4,0,0,4,0,4,0,4,2,2,0,0,2,0,2,2,0,2,4,2,2,2,4,4,2,4,2,1,4,0,2,2,2,2,2,4,0,2,0,4,2,4,2,0,2,0,4,2,0,4,2,2,4,2,0,4,4,4,4,0,4,2,1,3,1,2,2,3,2,2,0,2,1,2,2,1,1,3,1,2,3,1,1,3,1,2,4,1,1,3,1,3,1,3,3,1,1,3,1,2,1,0,4,1,1,3,0,3,2,3,0,0,1,3,4,0,4,0,1,3,1,4,0,1,0,1,3,4,4,3,4,2,2,2,0,4,2,0,0,2,2,4,3,1,1,1,2,3,1,0,0,4,3,0,1,1,2,3,2,3,4,0,1,1,3,1,2,2,1,2,1,0,1,3,2,0,2,2,1,4,2,4,3,4,0,3,4,4,4,4,0,2,4,3,0,3,3,2,3,1,3,2,4,1,4,1,1,0,1,3,1,0,1,3,3,3,2,1,3,1,2,2,3,0,0,2,1,2,3,1,2,2,3,0,1,1,1,1,2,3,2,2,2,2,2,2,2,2,2,2,3,3,3,1,3,1,3,1,2,1,1,3,1,1,3,3,3,2,3,2,2,2,2,0,2,1,3,3,3,2,1,0,0,0,1,0,4,4,1,2,0,0,4,4,3,3,2,4,2,4,4,4,1,3,0,0,1,3,3,2,2,4,3,3,2,2,1,1,4,2,2,2,2,4,3,0,3,0,0,4,2,4,0,2,2,0,0,0,4,3,0,4,1,3,1,0,0,3,1,0,0,4,4,4,0,2,2,3,2,4,0,4,0,0,0,4,3,0,2,4,3,1,2,3,3,4,3,1,3,1,1,2,1,4,0,2,4,3,0,0,2,0,4,3,4,0,4,4,4,4,4,0,3,1,3,1,3,3,1,2,2,0,3,3,3,0,0,0,0,1,3,4,1,4,1,1,4,1,4,4,1,4,0,0,4,3,3,1,3,4,1,1,1,3,2,0,2,4,1,2,3,3,1,1,2,2,2,3,2,1,1,4,2,2,3,2,4,0,4,4,2,2,0,0,3,3,2,2,3,2,3,1,1,3,3,0,4,1,0,0,3,1,1,1,3,3,1,1,1,1,1,1,1,3,3,3,0,2,4,2,2,4,4,2,4,4,0,4,2,2,2,1,3,1,3,1,2,3,2,1,3,3,3,3,1,4,4,3,3,1,3,3,1,3,3,2,2,2,2,4,2,1,1,1,1,1,1,1,1,2,2,2,1,3,3,1,1,3,1,1,3,0,1,3,1,1,3,1,0,0,4,3,3,1,4,1,1,4,3,3,3,4,4,3,4,1,3,4,1,2,2,2,2,3,3,2,2,4,2,2,3,2,2,0,3,3,1,3,0,1,1,4,1,3,2,3,3,2,1,0,4,4,0,4,1,3,1,0,3,3,3,3,3,4,4,0,1,0,2,1,3,0,3,0,2,1,3,4,4,0,1,3,3,4,1,4,4,3,3,3,1,0,1,3,4,3,0,1,4,1,3,3,1,3,1,3,4,2,2,0,0,2,2,0,2,0,3,2,1,2,3,0,1,1,2,2,1,2,2,4,4,0,4,4,1,1,2,2,1,2,4,1,4,0,0,4,0,0,3,1,0,1,3,1,0,3,1,2,2,2,2,0,4,4,2,2,2,2,2,2,4,0,0,2,2,2,4,4,2,2,2,2,2,2,2,2,0,2,2,2,2,2,4,2,4,2,0,0,2,2,2,2,2,1,2,2,2,4,2,2,2,2,2,2,2,2,2,2,2,2,0,2,2,2,2,2,2,4,2,3,2,2,0,2,2,2,2,2,2,2,2,2,2,2,2,2,2,2,2,2,2,2,2,2,2,2,2,2,2,0,2,2,2,2,2,2,2,2,4,0,0,4,2,2,4,2,2,2,2,2,2,2,2,2,2,2,2,2,2,2,2,4,2,0,4,2,2,2,2,2,2,2,4,0,0,2,0,1,1,3,0,3,1,2,3,2,3,0,4,1,1,3,1,1,3,1,0,2,3,2,2,1,3,1,2,3,3,1,0,2,3,2,3,2,3,1,3,2,3,1,3,1,1,1,1,1,3,1,3,3,3,3,1,3,3,4,3,3,1,2,1,0,1,3,2,2,4,3,0,2,3,3,3,4,3,2,1,1,4,2,1,0,2,2,3,3,3,2,4,0,3,1,2,2,2,1,2,1,4,3,3,4,3,2,1,3,2,2,4,4,2,4,3,3,3,1,1,2,1,1,0,0,4,4,2,3,2,2,3,0,1,3,4,1,1,3,1,0,3,2,2,2,2,0,1,0,3,0,2,4,1,3,3,1,1,0,4,1,1,0,4,0,2,3,1,0,1,3,0,3,0,4,3,0,3,2,3,3,1,1,3,0,3,2,0,0,2,4,3,3,0,1,0,1,3,1,1,3,1,4,1,3,2,3,2,0,1,2,0,3,4,3,1,0,2,3,2,3,3,3,2,2,4,1,2,1,0,2,0,0,2,1,3,2,1,4,1,2,3,2,2,2,3,1,3,3,3,3,3,1,2,0,1,1,1,2,0,3,0,0,4,1,1,1,1,4,4,4,2,4,3,2,2,4,0,2,4,2,1,0,3,4,3,0,4,0,3,0,4,4,0,0,0,4,4,3,4,2,2,4,4,0,0,2,4,0,3,3,0,4,4,4,0,1,2,3,0,1,4,3,3,4,3,1,2,4,4,2,2,0,2,1,1,3,3,0,3,0,4,3,1,0,0,2,2,2,4,0,1,1,3,4,3,2,1,0,1,3,0,1,0,1,1,0,0,2,2,2,3,3,3,3,0,1,1,0,1,3,3,4,2,0,1,2,1,2,1,4,3,4,4,4,4,1,4,0,3,1,2,0,1,1,4,0,2,1,2,0,4,3,4,1,2,0,0,1,0,3,3,4,1,2,0,0,1,4,0,4,0,1,4,1,0,1,0,2,4,2,1,2,1,4,0,3,4,2,4,0,0,0,1,3,0,1,4,4,1,1,4,3,1,1,4,3,4,3,3,0,2,3,4,4,4,4,4,0,0,0,2,1,2,4,4,4,2,4,4,3,4,4,1,0,0,1,1,0,4,1,2,0,1,0,0,1,2,4,0,4,0,3,1,3,3,2,2,1,3,1,3,3,4,1,4,4,1,0,0,4,3,4,3,0,1,1,4,4,1,1,1,2,2,1,3,3,1,2,2,0,0,4,1,2,2,2,2,3,4,1,1,1,1,1,2,1,2,1,1,3,2,3,2,1,2,1,3,1,1,1,3,1,1,1,3,3,0,4,2,2,0,4,0,4,1,1,4,2,1,3,3,0,1,3,3,3,2,2,1,1,3,2,2,2,1,2,3,2,2,0,4,3,1,4,4,0,4,1,1,1,0,1,2,3,2,3,3,2,1,1,3,4,0,4,2,2,0,4,0,2,1,3,3,4,1,1,0,1,4,4,1,1,0,3,0,3,1,4,1,3,4,2,0,1,4,3,4,3,1,2,0,0,2,0,0,0,4,4,3,2,2,2,2,2,0,0,4,2,3,2,4,3,4,4,3,2,0,3,4,4,2,1,4,3,0,1,0,2,1,2,3,2,0,3,2,4,3,2,4,3,2,1,1,1,0,2,2,0,1,1,2,1,0,4,0,0,3,2,4,2,4,1,3,1,2,1,2,4,0,3,4,4,4,4,4,0,1,4,2,3,3,0,0,4,2,2,2,0,0,0,4,0,0,3,0,3,2,4,4,3,0,4,2,1,2,4,2,3,2,4,0,0,2,1,0,4,1,2,3,4,2,2,0,1,0,3,4,4,1,1,3,1,3,1,3,1,1,2,0,3,1,1,1,1,0,4,2,0,1,1,1,1,1,4,1,0,4,4,0,3,3,2,3,1,1,2,1,3,2,0,1,4,2,0,2,3,2,3,1,0,3,3,0,3,2,4,0,0,1,0,0,4,1,4,0,4,0,4,4,3,2,3,1,0,1,4,0,1,1,4,1,4,3,3,1,2,2,2,3,0,0,2,2,1,1,2,2,1,1,3,3,2,1,1,1,4,3,3,1,1,0,3,2,3,3,4,0,1,1,0,1,3,1,1,3,2,1,1,1,3,3,1,1,4,2,1,2,2,2,2,1,3,4,4,4,4,3,3,1,3,0,1,1,1,4,0,1,4,2,0,4,4,3,0,0,1,1,3,1,1,1,4,1,0,3,0,3,3,3,1,1,0,0,3,3,1,3,1,1,2,1,3,3,1,3,2,3,1,1,2,1,3,1,1,2,2,2,2,0,1,3,3,3,4,4,3,1,0,1,1,4,4,3,1,1,3,3,3,2,1,3,1,2,1,0,2,2,2,4,2,2,3,3,2,1,1,3,3,1,1,1,1,3,0,2,1,2,3,1,3,3,2,2,1,2,2,1,3,1,1,4,1,3,1,3,0,3,1,3,1,3,2,2,1,1,1,3,1,1,1,3,2,3,4,0,3,1,4,0,4,2,4,2,2,4,4,4,0,0,4,0,2,2,1,2,4,2,0,4,4,4,2,2,2,0,0,2,3,0,4,4,0,4,0,2,4,0,2,0,0,2,2,1,0,1,3,0,3,0,0,4,3,4,0,1,2,0,4,0,0,4,1,1,1,1,3,1,2,3,0,0,3,0,0,1,1,1,1,3,0,4,4,0,0,0,0,0,0,1,0,1,1,4,4,4,1,0,4,4,4,4,1,0,4,4,0,0,4,0,4,4,0,0,4,1,0,4,3,0,1,1,3,4,1,3,1,4,4,1,3,0,2,1,4,4,0,4,0,1,1,0,0,0,0,1,4,0,1,4,3,0,0,3,1,0,3,3,4,3,0,3,4,4,0,4,4,0,0,0,0,0,0,4,4,0,4,4,4,0,0,4,0,4,3,1,4,0,1,4,1,1,1,1,0,3,1,0,1,4,1,4,0,3,1,3,0,3,0,0,4,4,0,0,4,0,4,1,0,3,3,4,3,3,3,0,1,3,0,4,0,4,4,3,1,0,3,4,4,0,1,0,0,1,3,0,4,3,1,0,0,0,1,4,0,0,4,3,4,0,1,0,1,4,1,0,4,4,0,1,4,2,4,3,4,0,1,3,0,0,3,4,4,0,0,4,4,0,0,4,4,0,3,4,3,3,0,3,4,3,0,0,0,4,0,4,4,0,0,0,4,4,4,0,0,0,4,3,3,3,2,2,2,4,4,4,1,3,1,4,1,3,4,0,4,0,4,4,4,0,4,0,0,0,4,0,4,4,4,4,4,0,0,0,2,0,4,0,0,2,4,3,1,4,4,3,0,0,4,0,1,3,0,4,1,3,1,0,0,3,1,0,1,3,1,1,0,1,3,2,1,4,3,0,4,3,3,4,0,1,4,1,3,1,3,4,0,1,0,0,3,0,1,0,0,0,0,1,1,2,2,0,0,2,0,2,4,4,0,2,4,0,0,4,4,2,2,4,0,2,0,2,4,2,2,4,4,0,2,4,0,4,0,0,2,4,2,2,0,0,2,2,2,2,2,4,0,0,4,0,0,3,0,4,0,3,0,1,3,4,4,0,0,0,0,4,0,4,4,4,0,0,0,0,1,0,1,1,0,4,4,0,1,4,2,2,2,2,3,2,2,2,2,3,4,0,0,4,1,2,1,0,4,0,2,3,1,3,3,4,1,3,0,1,1,1,4,3,1,3,2,2,4,3,0,0,3,2,0,2,1,0,4,3,4,1,1,3,1,1,2,4,1,1,3,3,3,3,0,3,3,1,2,3,1,1,0,4,3,1,3,3,3,1,1,4,1,0,2,1,1,1,1,3,3,0,3,1,4,2,3,4,2,4,2,1,1,2,3,1,2,0,3,3,1,2,1,1,1,4,3,2,3,4,3,4,3,2,3,1,0,4,3,2,1,3,1,3,2,2,0,0,3,1,0,4,3,0,0,4,1,4,4,3,2,2,4,4,4,3,4,0,0,4,0,1,3,1,4,2,4,3,1,4,1,0,4,2,1,1,4,3,0,3,3,0,1,0,4,4,1,4,0,3,0,0,1,3,0,3,0,0,2,0,1,3,0,4,1,3,3,1,3,3,4,3,3,4,4,1,0,0,4,0,0,3,4,0,2,3,1,0,1,0,2,3,3,4,4,0,2,4,4,3,4,2,3,3,4,4,1,1,1,1,3,1,2,0,1,2,4,1,1,4,3,3,3,0,2,4,1,3,4,3,1,0,4,0,0,0,1,3,1,4,1,4,1,3,4,1,4,4,0,1,0,0,3,3,4,4,0,0,0,1,3,4,3,3,4,3,4,3,1,4,4,0,2,2,4,3,1,1,1,2,1,3,1,4,4,1,2,3,4,1,0,1,2,4,3,0,3,3,4,1,2,1,1,3,2,3,3,3,1,0,0,2,0,4,3,1,0,2,2,0,3,0,0,0,4,0,3,3,4,3,4,4,4,3,2,1,1,0,1,4,1,0,3,2,4,0,1,4,0,0,0,1,3,1,2,4,2,3,2,3,0,0,0,2,1,3,1,3,3,1,1,1,2,3,2,1,4,0,2,1,1,2,3,2,3,1,1,2,2,1,3,1,1,3,3,2,1,1,2,2,0,4,2,3,0,2,2,4,4,4,4,4,2,4,0,2,0,0,4,4,4,3,4,2,0,4,2,2,2,0,2,1,4,4,0,4,4,0,2,4,2,0,0,2,3,4,2,4,0,2,2,3,2,2,1,4,0,3,2,0,4,2,0,0,1,4,0,0,2,3,1,4,1,0,2,4,2,1,1,3,4,4,4,3,0,2,4,0,4,4,2,3,4,0,0,1,3,4,3,3,3,1,1,3,4,2,1,0,0,1,3,4,3,2,1,3,3,2,2,4,1,2,2,0,0,4,1,0,2,1,0,4,4,2,0,2,0,2,4,0,2,3,3,1,1,2,4,4,0,2,0,0,4,2,0,4,2,4,4,0,3,1,2,4,3,3,0,2,2,3,1,3,4,1,1,3,0,1,1,1,4,3,1,1,1,1,2,3,3,3,3,3,3,0,4,0,0,1,1,4,1,1,1,0,2,3,2,3,3,4,2,2,0,3,4,3,1,0,3,3,3,2,3,1,4,0,4,0,0,4,0,4,0,4,4,1,0,3,0,0,0,1,0,0,3,3,3,1,0,1,1,3,2,4,4,3,2,3,3,1,1,2,3,1,3,2,3,4,4,1,1,1,3,1,2,1,3,3,2,3,2,1,2,3,4,0,4,1,2,2,3,3,3,0,4,1,4,2,3,0,3,0,1,3,4,1,0,0,2,2,2,0,4,3,3,3,3,0,3,0,2,3,2,1,1,2,0,0,4,0,0,1,2,3,3,2,2,2,1,4,1,4,3,1,1,1,3,1,1,1,3,3,2,3,0,4,1,1,2,4,4,3,3,3,3,0,4,4,2,2,4,0,2,2,2,2,1,4,0,3,0,2,0,2,4,2,2,2,0,2,2,4,2,2,2,4,4,2,2,2,2,4,2,2,2,2,1,3,0,1,1,1,1,1,1,1,3,3,1,3,1,4,3,1,2,3,3,2,2,3,1,1,2,3,1,1,2,1,1,3,2,1,1,0,0,3,2,0,0,0,4,4,1,4,1,1,0,2,1,4,2,4,3,3,4,0,2,3,2,4,2,2,3,4,3,1,3,0,4,0,1,1,4,0,1,3,2,0,4,4,3,4,2,2,4,0,4,4,0,0,1,0,0,0,4,2,1,2,0,2,2,0,4,4,3,0,0,2,4,0,4,4,2,2,2,1,3,1,3,0,2,2,0,3,0,2,0,1,3,4,3,0,1,1,3,1,0,4,4,1,3,3,3,1,3,3,3,3,1,3,1,1,3,3,3,1,1,2,1,3,1,3,3,1,1,1,1,3,4,1,1,2,2,1,1,1,3,1,3,4,1,1,0,1,2,2,0,3,1,3,2,1,2,1,3,2,1,1,1,3,4,3,1,3,2,0,2,4,0,2,0,0,3,3,0,1,3,4,2,2,1,4,4,2,1,2,0,3,2,1,0,2,1,2,3,4,0,3,3,1,1,3,2,2,1,2,3,0,1,4,3,1,3,3,1,4,1,2,4,3,0,2,3,0,1,4,1,4,0,4,1,1,1,1,0,3,3,3,2,0,2,3,1,3,0,3,3,3,4,1,1,4,0,4,3,0,1,1,0,4,4,1,3,1,3,3,0,0,4,4,0,1,1,4,3,1,3,0,3,1,2,2,3,1,1,0,3,1,0,0,1,4,2,3,4,4,4,3,0,0,1,3,3,3,3,3,3,2,1,3,2,3,2,2,4,2,1,1,2,1,0,3,2,2,4,4,4,3,1,2,3,1,3,4,1,4,3,1,4,2,3,2,2,2,1,2,2,0,3,3,3,2,4,2,4,2,3,0,1,1,1,2,1,3,3,3,1,3,3,0,1,4,2,3,1,3,1,1,4,1,2,1,2,1,3,3,3,1,3,4,1,2,3,3,2,3,1,3,2,3,3,0,1,1,3,3,3,0,1,3,2,1,0,3,0,0,4,1,1,3,1,0,1,0,2,0,1,1,3,4,1,4,3,4,0,3,0,1,1,0,0,2,2,1,2,2,0,3,1,4,1,4,2,2,2,1,3,3,2,1,4,3,4,1,3,3,3,1,0,1,0,3,3,3,0,3,2,1,1,0,1,0,0,2,0,4,1,0,2,4,3,1,1,1,1,0,1,2,3,0,3,2,4,1,0,0,1,2,0,3,1,3,1,1,3,2,3,2,3,2,1,3,1,2,1,3,1,2,1,2,3,1,1,3,2,0,1,3,2,1,0,1,3,3,1,1,1,0,2,1,1,3,3,1,2,3,1,1,3,4,3,2,1,1,0,1,0,3,3,0,0,1,3,3,1,1,0,3,1,0,2,3,4,2,3,3,0,3,1,3,2,3,1,0,4,3,0,2,3,3,3,3,1,1,3,1,1,1,3,3,1,2,1,4,2,2,2,1,3,0,2,1,2,4,1,1,4,3,1,2,1,2,0,4,2,2,0,1,4,1,2,1,4,0,4,4,0,0,1,4,2,0,2,4,2,0,1,4,2,0,2,4,4,1,0,1,3,4,4,2,0,3,3,4,2,0,2,0,1,4,4,3,3,3,0,3,3,2,3,1,4,0,3,0,4,1,1,1,4,4,1,4,0,2,4,2,3,0,3,0,2,0,3,2,3,3,3,2,4,1,3,1,2,1,1,3,3,0,3,2,1,4,1,3,0,4,1,4,2,4,2,4,3,0,1,1,3,4,0,0,3,4,3,2,4,4,4,3,0,3,2,0,2,3,2,1,1,3,0,3,3,4,2,2,2,2,1,4,1,1,3,1,2,4,3,4,0,0,0,1,4,3,4,4,1,4,0,1,2,0,0,2,2,0,2,4,2,4,2,2,3,3,0,1,1,3,1,1,3,3,0,1,3,1,3,3,3,0,3,1,0,4,3,1,4,1,1,1,2,0,0,4,4,4,0,0,0,2,0,0,4,1,1,0,1,1,3,4,2,1,3,4,4,3,4,4,4,2,2,3,4,4,0,1,2,2,2,0,0,3,1,2,1,3,2,3,1,3,3,0,4,0,4,3,0,1,3,1,0,3,3,1,1,3,0,3,3,1,1,3,4,4,3,4,1,1,2,1,2,3,3,3,2,4,2,2,1,2,1,1,2,0,2,1,1,0,3,2,2,1,3,3,1,1,2,3,4,2,3,1,2,3,2,0,3,1,2,3,1,1,2,0,3,2,1,1,1,1,3,4,3,2,4,4,2,2,2,2,2,2,2,1,3,2,1,2,3,3,1,2,1,1,1,1,2,4,4,2,3,1,1,0,1,1,4,2,2,3,1,2,1,1,1,2,2,2,2,0,2,2,2,2,4,4,4,3,3,1,4,1,1,4,3,4,2,2,1,4,2,3,2,4,2,3,3,2,2,1,2,1,2,4,1,0,3,2,2,0,4,3,1,3,0,3,1,1,3,4,0,3,1,3,3,3,4,1,3,2,3,1,4,4,0,2,0,2,3,2,1,1,3,2,0,0,4,3,3,2,3,2,1,3,3,0,4,2,1,3,0,1,1,3,1,3,0,3,3,2,4,2,1,1,1,2,3,3,1,3,3,2,3,4,2,2,3,3,3,0,2,1,3,3,3,0,3,0,4,1,1,2,3,1,4,3,3,0,4,1,1,0,1,3,1,1,3,4,3,1,3,1,1,3,3,3,1,2,0,3,0,1,3,4,1,1,3,1,4,3,4,4,0,1,0,4,1,3,4,4,4,0,1,1,0,3,4,4,1,4,0,0,3,4,4,3,0,1,4,1,3,3,1,3,3,1,4,3,3,4,0,3,1,0,3,4,0,3,1,1,3,3,3,3,2,4,1,1,3,1,2,0,2,3,1,3,2,3,3,2,0,4,1,2,2,2,4,3,1,0,3,1,0,2,1,2,2,3,4,0,3,3,3,4,4,1,3,4,0,1,3,0,0,1,3,3,0,3,1,1,1,0,1,0,0,4,1,3,2,0,1,3,4,3,1,2,3,4,4,3,1,3,3,2,0,0,3,2,3,2,3,2,3,1,1,3,2,3,2,1,3,3,2,3,3,1,1,3,1,3,1,2,1,3,3,0,1,1,3,2,3,3,3,1,0,3,3,3,1,1,2,3,3,0,1,1,3,1,1,3,0,2,4,1,2,0,3,3,2,3,1,1,4,3,3,4,1,4,0,3,1,2,3,1,0,3,0,3,0,0,2,1,2,1,3,4,3,1,4,3,0,1,0,4,0,3,4,0,0,0,0,0,0,3,0,0,1,2,1,1,4,4,0,1,0,3,3,3,4,0,4,0,4,2,3,3,2,2,4,1,4,4,0,1,3,3,1,2,1,3,0,1,3,3,0,2,1,1,1,3,0,3,0,3,1,2,1,0,2,3,2,4,1,3,3,1,3,3,1,3,1,1,1,1,3,3,3,1,3,1,3,3,3,4,1,3,3,1,3,1,3,3,1,3,3,3,2,1,1,1,1,3,1,0,1,2,1,2,2,0,2,3,3,4,3,2,4,1,3,3,1,1,3,2,4,1,2,3,3,0,3,1,2,3,1,3,0,0,1,3,2,3,0,3,3,1,4,0,4,4,3,0,4,3,1,3,3,2,1,3,2,3,3,1,1,2,3,4,2,1,4,2,3,0,0,2,0,0,0,2,4,0,0,1,3,3,0,1,0,2,2,2,2,2,4,2,2,4,2,2,2,2,2,4,0,2,0,4,2,2,4,2,2,2,4,2,4,2,2,0,2,2,2,4,2,2,2,0,2,0,4,2,0,4,1,1,1,4,2,0,0,3,2,2,2,2,4,2,3,4,4,4,3,3,1,1,1,4,1,3,4,3,1,3,1,0,3,3,4,2,1,1,3,1,3,1,3,3,2,3,0,1,3,3,2,2,3,1,1,3,1,0,0,4,3,3,0,1,1,4,4,0,1,0,0,3,2,1,4,4,4,0,3,1,2,0,1,1,3,4,4,3,2,4,3,3,1,0,3,2,1,2,2,2,3,4,3,3,2,2,2,4,2,2,2,2,2,2,1,3,0,2,2,3,2,3,0,2,2,2,0,1,1,4,4,3,4,2,2,0,1,0,1,0,3,2,2,0,1,1,4,2,2,2,2,1,3,3,4,1,0,2,3,2,2,2,2,2,2,3,0,0,3,3,0,1,1,3,1,3,3,1,2,3,1,2,2,3,3,3,1,2,3,1,4,3,3,2,1,2,2,2,2,2,2,2,2,3,2,2,2,2,2,2,2,2,4,2,2,2,1,2,2,2,2,2,2,2,2,2,2,2,2,2,2,2,0,2,1,2,1,2,2,2,2,2,2,1,1,2,2,2,2,2,2,2,2,2,2,3,2,2,2,2,2,2,2,2,2,2,2,2,2,2,2,2,2,2,2,2,2,2,2,2,2,2,2,2,2,2,0,2,2,2,2,2,2,2,2,2,2,2,1,2,2,2,2,2,3,2,2,2,1,2,3,2,2,2,2,0,0,0,0,2,0,0,2,2,2,2,2,4,2,2,2,0,2,4,2,3,0,1,3,2,3,0,2,0,3,0,4,2,2,2,2,2,2,0,1,1,2,0,1,4,3,2,1,3,2,2,4,0,1,2,4,2,3,1,2,1,3,1,3,0,4,4,0,4,2,2,0,4,2,0,2,2,1,4,1,3,1,2,1,1,1,2,1,1,0,2,1,1,2,0,2,1,1,3,3,2,1,4,1,3,1,4,1,3,3,1,1,3,3,3,2,1,3,3,3,0,3,0,0,0,1,1,4,0,2,1,1,1,1,3,3,1,3,1,1,3,1,3,4,4,1,2,1,3,1,1,0,1,3,1,0,3,2,2,2,3,3,2,1,4,4,3,1,1,3,3,1,2,0,4,0,0,2,0,1,1,2,1,1,0,3,4,1,1,3,1,3,3,2,4,3,4,3,0,2,1,3,1,4,2,1,0,2,3,3,0,2,2,2,3,1,0,2,4,0,1,2,3,2,2,0,0,1,2,4,3,3,4,3,2,1,2,2,1,2,2,3,2,2,2,2,3,3,2,3,1,1,1,3,0,3,3,3,3,2,3,4,1,4,1,2,3,3,0,1,4,2,3,0,4,2,2,0,0,2,0,0,2,4,0,0,2,2,2,2,2,2,2,1,1,3,0,2,0,2,2,2,3,2,0,1,2,4,3,2,4,2,2,4,3,2,0,3,3,4,4,1,2,0,1,0,1,4,4,1,4,4,3,1,4,1,4,1,1,3,3,3,1,4,1,2,4,0,4,0,1,2,0,0,3,3,1,2,1,1,0,3,0,4,0,2,4,0,2,2,2,1,0,4,2,3,4,1,2,2,2,4,2,1,0,2,2,4,0,0,2,2,0,1,3,2,1,3,1,2,2,3,4,0,2,3,3,3,1,2,4,3,2,3,0,0,4,1,2,0,4,1,0,4,0,0,2,1,1,2,3,2,2,1,0,4,2,1,1,0,1,1,0,3,1,3,1,0,2,1,2,0,1,2,0,2,2,0,2,2,4,4,2,2,0,2,2,3,3,3,1,0,4,4,0,1,0,3,4,0,1,3,2,2,1,1,2,3,2,2,3,2,3,1,3,0,2,2,1,1,1,1,0,4,0,0,2,0,2,2,4,2,4,2,4,4,2,0,2,1,1,0,1,0,0,4,1,3,1,1,3,3,1,0,3,2,3,2,2,2,0,4,0,0,0,0,0,4,0,0,1,0,0,0,3,4,0,3,4,0,3,0,3,4,4,0,0,0,4,0,0,1,4,0,4,4,0,4,4,2,4,0,0,0,4,0,4,0,0,0,0,0,0,0,4,4,0,0,2,4,4,2,2,0,4,4,3,1,0,4,2,4,0,3,2,1,2,2,0,2,4,2,2,2,2,4,2,3,4,3,3,1,3,1,4,0,1,4,3,0,4,3,4,2,2,2,1,3,3,4,0,0,1,2,4,2,3,1,4,3,2,3,4,0,4,4,0,3,4,0,4,4,2,4,3,4,0,1,3,3,3,1,4,0,3,3,3,3,3,3,1,1,1,0,4,4,3,1,2,1,3,4,3,4,1,3,4,0,2,3,1,1,1,3,1,4,0,0,4,4,4,3,0,2,3,3,3,4,1,4,3,1,0,4,3,1,1,4,3,4,1,3,4,1,4,4,3,0,4,2,2,4,0,4,0,0,1,3,1,4,1,4,3,1,3,3,0,0,0,4,1,3,1,4,4,0,0,3,3,4,2,0,1,0,0,0,1,0,4,0,4,4,3,4,4,1,4,0,4,0,1,1,1,0,3,4,4,3,4,3,0,0,3,1,3,1,1,4,1,3,0,2,0,4,3,3,3,3,4,1,0,4,4,0,1,3,1,1,1,2,3,3,4,3,4,0,1,4,4,4,1,2,2,2,2,3,2,1,1,4,4,2,2,2,1,3,1,3,1,3,1,4,1,2,3,1,1,0,3,1,1,3,4,0,1,2,3,4,2,2,1,3,0,0,4,1,3,4,3,4,3,1,4,3,1,1,2,2,4,0,4,4,4,2,2,0,1,2,4,1,3,2,0,2,2,3,2,1,3,1,1,3,4,1,3,1,3,2,2,4,1,0,2,1,2,0,4,4,3,1,2,3,2,2,3,2,3,1,0,0,3,1,2,3,4,0,2,2,0,2,0,2,2,4,1,2,4,0,1,1,3,3,1,4,4,0,0,2,1,3,2,0,0,0,0,3,2,3,4,2,0,3,1,3,0,4,4,1,1,1,3,2,1,2,2,2,2,1,3,4,0,2,2,2,2,2,3,3,2,2,4,0,4,1,4,0,1,4,0,0,0,1,0,4,0,0,0,2,4,0,4,4,0,2,1,1,3,2,2,0,3,0,3,1,0,4,4,2,1,1,1,2,3,1,4,3,4,0,3,3,2,1,4,3,2,1,1,1,0,3,1,1,1,3,1,1,0,4,2,0,0,2,2,1,4,1,1,0,3,3,1,1,2,0,1,0,2,3,4,2,3,3,2,2,4,0,1,1,1,2,3,2,1,1,1,1,4,2,3,2,3,1,3,3,1,2,4,4,2,0,4,3,4,2,3,4,4,2,2,2,2,3,1,0,1,4,0,2,2,2,3,2,2,2,2,4,3,3,0,1,4,4,3,1,2,1,4,4,1,3,2,3,1,1,3,1,3,2,3,1,3,2,2,2,2,1,1,3,1,1,3,1,2,3,2,1,3,2,3,2,3,1,1,3,1,2,3,3,2,2,2,3,1,1,3,2,1,4,1,3,0,2,0,2,0,2,2,1,0,3,3,0,3,0,2,1,0,2,1,2,1,3,1,3,1,1,3,3,4,2,3,1,3,0,3,1,1,0,4,0,1,0,4,1,1,0,1,2,3,2,1,3,0,2,4,0,1,2,2,3,2,2,1,3,1,1,4,4,1,0,1,2,1,3,3,4,3,2,2,4,4,0,3,0,3,1,1,1,4,2,2,2,2,2,0,0,4,3,2,3,2,2,2,2,2,2,2,2,2,2,2,2,2,0,0,4,1,1,1,1,1,3,1,3,3,3,1,1,3,1,1,3,3,3,1,2,2,2,2,2,2,2,2,2,1,4,0,1,1,3,3,3,2,2,3,2,1,0,4,4,4,1,3,3,3,3,1,4,3,4,1,4,0,2,1,3,3,1,1,2,2,0,2,3,2,2,2,2,2,2,2,2,2,2,3,1,1,1,2,1,2,2,1,2,2,2,2,2,2,3,2,2,2,2,2,2,2,2,2,2,2,2,2,3,1,3,1,1,3,3,2,1,2,2,4,0,1,1,1,4,1,3,1,0,0,4,1,0,4,3,3,3,4,3,3,0,0,1,1,2,3,0,3,3,1,3,0,1,3,1,1,2,1,2,2,4,2,3,1,3,2,2,1,1,3,2,1,3,1,3,2,2,2,3,2,1,3,2,1,1,3,1,2,4,1,1,2,1,2,3,1,2,4,2,2,2,2,3,3,2,2,3,2,2,2,1,2,3,0,1,3,1,4,3,3,3,3,3,3,0,1,1,3,1,3,1,1,1,1,3,0,0,1,0,4,1,0,1,4,1,1,3,3,4,4,4,4,1,3,3,3,0,1,4,3,1,1,3,0,3,1,3,3,1,2,4,4,2,2,2,2,2,2,2,2,2,2,2,2,2,2,2,2,4,2,2,2,2,2,2,2,2,2,2,2,4,2,2,2,2,0,0,0,2,2,4,2,2,2,2,2,0,2,2,4,0,1,2,1,3,1,3,2,2,3,2,3,3,0,0,4,1,3,3,2,2,3,1,1,4,3,1,3,1,3,3,4,2,1,1,3,3,4,1,1,0,2,1,0,2,1,3,1,2,0,3,3,3,3,2,0,0,3,3,3,1,3,3,4,3,1,4,3,3,3,1,1,3,0,0,0,3,0,4,3,1,3,4,1,0,0,1,3,1,1,4,3,2,1,1,1,2,1,0,0,4,3,1,0,4,1,1,3,1,3,1,3,3,3,1,3,3,4,0,2,0,2,3,4,1,1,4,1,2,1,2,2,0,4,0,3,0,4,2,3,2,2,1,1,0,4,1,2,4,4,0,4,1,0,4,0,4,0,2,2,0,0,0,2,3,2,0,4,3,2,4,2,0,2,2,3,3,0,2,4,0,4,0,4,3,3,4,2,1,2,2,2,2,2,4,4,2,2,2,2,2,4,2,2,1,2,1,2,1,1,3,2,3,3,4,4,1,0,0,0,4,0,4,1,1,4,4,3,4,1,1,3,1,2,3,3,1,3,2,3,3,3,3,1,2,1,3,1,3,4,0,0,1,3,4,2,2,2,1,1,1,3,4,4,0,0,2,2,3,3,3,3,0,1,3,2,2,3,3,3,1,3,4,4,3,1,1,1,1,2,4,0,0,3,1,1,3,3,3,1,1,1,1,3,1,3,1,3,2,4,1,3,1,0,2,4,3,2,1,3,4,1,1,2,4,2,1,1,2,2,2,3,3,1,3,3,0,1,3,4,1,1,1,0,2,1,2,2,4,2,4,4,1,4,2,4,0,0,3,2,1,1,4,1,0,0,4,2,3,0,0,1,1,2,3,3,0,2,2,1,3,2,1,2,3,3,2,2,2,2,2,2,1,2,2,1,3,1,4,4,1,3,3,3,3,1,4,3,1,0,4,3,1,0,1,2,1,1,0,0,2,3,4,1,1,1,3,2,4,0,2,2,3,2,4,3,0,4,0,2,0,0,2,0,2,1,4,1,4,3,4,2,0,3,4,4,4,4,2,4,1,2,4,1,3,0,2,1,2,2,2,3,1,3,3,2,2,1,1,3,3,1,3,2,1,1,2,1,2,1,1,3,1,1,3,4,0,4,3,1,1,1,3,1,1,3,2,3,1,3,3,3,1,1,3,1,3,1,3,3,3,3,3,3,1,2,2,2,3,1,1,1,1,1,3,1,1,2,2,1,3,0,1,4,4,3,1,1,3,3,3,1,4,2,3,1,3,1,3,1,1,1,0,4,1,2,3,2,4,2,0,2,4,2,1,3,3,2,1,0,2,1,2,4,1,1,2,0,0,0,2,2,2,3,0,1,0,2,2,4,2,2,2,2,2,2,2,2,3,2,3,2,2,2,2,2,1,2,2,2,2,2,2,4,2,1,2,2,2,2,2,3,2,2,2,2,3,2,2,3,3,1,2,0,4,0,0,4,2,2,2,2,2,2,2,4,2,2,2,0,0,0,2,2,2,2,2,0,2,2,2,2,4,2,2,2,2,2,2,2,2,2,2,2,2,0,1,2,2,2,1,2,2,3,2,0,3,0,1,0,3,2,3,1,2,1,1,2,2,1,3,1,2,2,0,2,2,2,2,2,2,2,4,2,2,4,0,2,2,2,2,2,2,2,2,2,2,2,2,2,2,2,2,2,4,2,2,3,1,1,1,4,0,0,4,4,1,0,2,1,4,3,3,3,4,0,0,4,3,3,3,4,4,0,3,1,4,2,3,2,0,0,0,1,2,2,2,4,2,4,0,1,0,4,4,1,3,1,1,2,3,3,1,0,0,3,2,3,1,4,4,3,2,1,3,4,4,1,3,4,1,3,3,4,1,3,0,3,4,0,4,1,1,4,1,3,2,0,2,1,3,3,4,3,3,0,1,2,1,4,1,3,4,3,0,2,2,2,0,0,1,3,2,1,1,1,2,4,3,0,3,0,4,0,3,0,3,2,0,2,2,0,4,4,0,4,0,1,3,1,2,0,3,1,4,4,1,2,0,0,3,2,3,3,0,3,4,3,1,2,3,1,3,0,3,4,4,2,2,0,3,4,4,3,4,2,1,2,3,2,0,4,2,2,3,3,3,1,3,0,1,3,1,0,1,4,4,0,1,4,0,0,1,1,4,3,2,3,4,1,1,3,3,4,2,3,3,3,1,3,1,3,2,1,3,0,3,2,2,4,3,2,4,2,2,1,4,0,1,3,2,4,2,1,1,4,4,4,2,2,1,4,0,2,3,1,2,3,4,0,3,1,0,2,2,1,1,4,0,1,4,3,2,4,1,3,1,3,0,0,0,1,0,3,4,4,0,3,3,1,1,2,3,3,0,3,1,1,4,1,1,2,2,3,1,1,3,0,0,0,2,4,1,3,4,0,3,1,3,0,3,2,1,1,1,3,3,4,2,3,0,0,3,4,3,3,3,2,0,2,3,3,3,3,0,3,3,4,1,1,1,1,0,3,2,2,1,4,3,0,4,0,0,3,1,3,1,1,1,3,1,3,3,2,3,1,3,1,3,1,4,2,1,4,4,4,3,1,4,2,0,1,3,4,0,3,3,3,3,0,0,0,4,4,0,0,3,2,0,0,0,2,0,2,2,3,0,0,0,1,4,3,2,4,1,3,0,2,1,0,4,4,2,0,4,3,2,0,0,0,1,3,0,0,4,0,0,0,2,0,4,4,4,4,4,4,1,4,0,1,0,0,4,0,3,3,4,4,0,1,2,4,2,4,4,2,2,2,2,4,0,1,4,4,4,1,0,0,3,0,3,1,4,0,1,3,4,4,4,4,0,0,0,4,0,0,4,1,0,4,0,4,0,1,1,1,0,0,1,0,3,3,3,3,4,1,3,3,3,2,4,0,0,4,4,1,4,2,3,2,1,0,1,0,1,1,0,4,0,3,4,1,1,0,4,4,3,4,4,0,4,4,3,0,3,1,1,1,1,3,1,1,1,3,1,0,4,2,1,4,1,3,0,4,0,4,0,1,1,0,3,4,4,2,0,2,0,0,2,4,1,3,1,3,4,0,2,4,2,2,2,4,2,4,4,2,2,4,2,2,0,3,1,1,4,3,4,2,4,4,3,2,1,0,3,3,3,0,1,4,3,0,4,1,4,3,1,4,4,4,2,4,4,2,2,3,2,3,0,2,1,2,3,2,2,2,2,0,1,2,0,1,1,3,3,4,1,2,2,2,1,2,0,4,0,3,3,2,3,2,2,2,2,2,2,3,2,1,4,3,3,1,1,3,1,1,1,1,0,1,2,3,3,3,0,3,3,3,0,2,3,1,3,1,3,1,2,1,2,1,3,3,3,1,0,1,1,4,1,0,0,3,1,1,1,3,1,4,2,0,4,0,3,1,3,3,2,4,1,3,1,1,3,2,1,1,1,3,4,2,2,0,2,2,2,0,4,3,2,3,2,4,4,2,3,0,2,3,1,1,4,2,2,2,4,1,4,1,3,3,0,0,4,4,0,4,4,4,0,4,1,4,0,0,4,0,4,4,4,4,0,4,0,3,0,2,0,0,4,4,0,0,1,4,4,3,4,2,1,0,2,2,1,2,4,2,4,4,4,2,3,0,4,0,3,2,0,2,2,1,3,2,1,1,0,4,0,0,0,2,1,0,4,4,2,0,4,4,4,0,4,2,2,4,0,4,4,4,2,2,0,4,0,1,0,1,1,4,0,0,2,4,3,2,0,1,1,1,3,1,2,0,1,0,4
B119,0,1,1,3,3,1,3,3,3,3,2,3,3,0,1,1,3,1,1,3,3,1,3,1,1,4,1,3,2,4,0,0,4,3,3,1,3,0,4,0,0,4,0,0,1,1,4,1,3,3,1,0,0,4,2,4,2,0,0,3,3,2,1,0,3,0,0,2,0,4,2,4,4,0,0,0,2,4,0,0,4,1,2,1,2,2,2,2,4,2,2,2,2,4,2,4,2,2,2,4,2,0,4,2,2,2,0,2,2,2,2,4,0,2,4,0,2,2,0,0,2,0,2,2,4,1,3,2,4,4,1,3,3,0,3,1,1,2,3,0,3,0,2,1,2,1,1,2,1,2,4,0,2,0,3,1,1,0,1,3,3,3,1,3,1,3,3,1,3,1,0,0,4,3,4,3,4,3,1,2,1,3,1,4,0,4,0,1,1,2,3,0,1,3,3,0,1,3,2,1,0,4,3,0,1,0,4,1,3,3,0,0,4,3,3,3,1,4,0,4,0,0,3,0,4,0,0,0,0,0,4,0,1,3,1,3,3,3,4,3,3,2,1,3,1,2,1,2,1,1,1,1,3,2,4,2,1,2,2,2,2,2,2,2,2,0,3,3,3,1,3,3,4,2,3,4,3,4,0,2,4,0,0,4,4,4,4,0,4,3,0,1,4,4,0,0,4,0,4,0,0,0,0,1,0,0,4,4,4,4,4,0,4,4,4,0,3,0,0,3,4,4,1,0,3,0,4,1,4,3,1,0,3,3,4,0,4,3,4,4,0,3,4,4,1,4,0,3,4,1,3,4,0,3,3,0,0,4,1,2,0,3,2,1,1,3,2,1,0,3,4,1,0,2,3,2,1,3,1,4,3,1,1,3,4,3,3,0,0,1,0,4,3,0,2,0,1,3,0,3,1,4,0,0,1,1,1,1,3,4,1,0,2,0,1,1,3,3,4,1,1,3,1,1,3,1,2,2,0,0,0,1,2,4,3,4,4,4,1,2,4,1,1,1,3,3,0,3,1,0,2,1,1,4,1,3,0,0,4,0,4,4,3,3,1,1,1,4,0,4,1,3,2,4,2,0,1,0,0,3,0,0,2,0,1,1,0,2,0,0,0,2,1,4,2,4,3,1,1,0,1,1,1,0,4,2,1,0,3,0,1,4,1,3,0,4,0,1,3,4,0,3,1,1,1,1,3,1,3,3,2,2,4,3,3,1,4,2,1,3,2,4,3,1,3,1,1,2,3,2,3,1,4,2,3,0,3,2,3,4,4,2,3,2,1,2,1,1,4,1,3,0,3,2,3,0,1,0,3,1,2,1,3,1,3,2,2,2,1,1,0,1,1,0,4,0,2,2,2,0,0,1,2,2,0,4,0,3,1,4,1,0,0,0,0,1,0,1,3,0,1,0,1,4,4,0,3,1,1,1,2,4,2,4,0,1,1,2,0,3,0,0,1,3,0,0,0,3,4,4,3,0,4,4,2,0,0,0,4,1,2,1,4,3,2,4,4,3,1,1,3,2,3,1,4,1,0,1,1,2,2,4,3,4,1,4,1,4,3,4,1,3,1,1,1,1,3,1,1,1,1,1,1,1,3,3,4,4,0,4,0,4,4,0,2,4,2,2,2,2,0,2,4,3,4,3,4,1,3,3,1,3,1,3,1,0,1,1,1,4,3,3,3,0,4,3,3,4,0,0,3,3,4,2,0,0,4,4,0,4,1,1,4,4,1,3,2,0,2,1,0,4,4,2,3,0,4,2,3,2,1,1,3,3,3,3,2,2,1,4,2,0,4,3,2,1,2,0,3,1,3,2,2,2,2,0,3,0,3,0,4,4,3,3,4,2,1,0,3,1,4,0,3,2,2,2,1,1,3,1,0,1,0,3,0,0,3,1,3,4,4,4,1,3,0,4,0,3,1,1,0,3,3,3,2,2,3,1,0,2,3,4,0,0,2,4,1,1,1,4,0,3,3,3,1,4,3,3,1,3,1,1,2,4,1,3,0,1,2,3,3,3,0,1,0,3,3,3,1,1,2,1,2,4,4,2,3,4,3,2,1,0,3,2,1,2,2,2,4,3,1,2,2,4,0,4,3,3,3,3,1,2,3,3,3,3,2,2,0,3,3,1,2,2,0,3,3,3,4,2,1,2,3,1,0,3,3,3,1,1,3,1,4,3,3,3,3,1,0,3,2,3,2,3,2,3,3,2,4,0,4,1,4,3,3,0,1,1,4,1,3,3,1,0,0,0,4,3,3,1,4,3,0,3,1,1,1,0,3,0,1,0,0,1,1,1,1,0,2,3,0,1,2,2,4,2,2,2,3,2,2,2,1,1,1,0,0,4,3,3,3,4,1,1,3,2,1,2,1,4,1,3,4,3,3,3,2,3,1,2,3,3,1,1,1,2,3,1,1,3,0,2,3,1,3,4,1,1,4,1,3,0,1,4,1,3,1,4,3,2,3,3,0,1,3,3,1,3,4,1,0,3,3,2,4,1,3,0,3,4,0,3,1,2,4,0,2,3,4,1,4,3,1,4,1,0,1,3,4,4,3,0,1,4,4,1,3,2,4,4,4,0,1,0,1,0,3,4,1,1,1,4,4,4,0,4,0,2,4,0,4,0,4,0,4,4,0,2,4,4,0,3,2,3,0,0,4,0,0,4,4,1,0,0,0,3,4,4,4,4,3,1,1,4,4,0,0,0,0,1,1,3,1,1,4,4,0,0,0,3,4,1,3,4,1,3,1,1,4,4,1,2,4,0,4,4,2,1,2,1,3,0,2,4,2,1,0,3,1,4,0,2,0,3,0,0,2,1,4,3,0,2,1,0,3,0,4,3,1,4,2,1,2,1,1,1,0,0,1,0,1,2,1,2,3,0,4,4,0,3,1,2,2,1,0,4,0,3,0,4,2,3,0,1,2,3,3,0,4,1,0,0,1,0,4,2,4,4,4,1,0,0,2,1,2,4,0,3,0,3,0,1,1,3,0,1,0,3,3,2,4,2,0,4,4,1,4,0,2,4,1,1,0,2,3,2,3,1,2,2,4,2,2,2,4,2,3,2,2,1,0,3,0,4,3,2,3,1,0,3,4,4,1,4,4,4,2,0,2,2,4,0,3,4,4,3,0,2,0,4,4,4,0,3,4,1,0,4,3,1,2,2,1,0,4,0,2,0,3,4,0,3,3,4,2,1,3,2,2,1,1,2,1,3,1,1,1,0,0,2,0,4,3,3,2,4,0,3,3,4,3,1,4,4,4,0,3,0,2,1,2,2,0,4,0,2,4,1,4,4,2,4,2,0,2,2,2,2,1,2,1,2,2,4,4,0,0,4,2,0,2,4,0,1,2,3,2,4,3,3,2,4,3,0,2,3,0,1,4,1,2,3,0,2,0,1,0,1,1,3,2,2,4,2,1,1,1,3,0,2,2,2,4,2,3,1,3,0,4,0,2,0,0,0,1,0,4,2,4,2,0,3,1,1,1,1,3,3,3,2,3,1,1,1,2,2,3,2,3,3,1,1,1,1,2,1,3,3,3,1,3,3,2,2,1,1,1,3,2,2,2,0,2,1,3,0,1,3,4,1,1,2,1,4,1,1,1,3,3,3,1,1,3,3,2,3,3,1,3,3,3,3,2,0,2,0,2,0,3,3,0,2,4,1,4,4,4,1,0,0,3,0,3,0,0,2,4,0,1,0,3,4,1,4,3,2,3,4,2,2,1,1,0,1,0,4,2,4,2,2,4,2,3,1,1,2,3,1,4,4,2,3,1,1,1,3,1,3,3,3,1,3,3,3,0,1,1,1,4,1,1,3,1,3,3,1,0,1,1,0,1,1,1,4,1,4,3,1,3,2,1,3,3,3,1,4,1,3,3,2,0,2,3,4,1,1,4,1,1,1,3,3,3,1,1,3,3,2,3,1,1,1,0,3,3,3,3,1,0,3,0,4,2,1,4,4,1,4,3,3,0,2,3,3,1,0,1,3,3,3,4,1,1,3,3,3,0,2,1,3,0,1,1,1,4,1,2,1,0,1,1,2,3,3,3,3,4,0,0,3,1,3,3,2,4,1,1,2,3,1,3,3,4,3,1,3,3,4,2,3,2,3,3,3,3,1,2,3,0,0,4,0,4,1,3,1,3,1,1,1,1,3,1,0,3,4,1,3,2,3,4,2,3,2,2,3,0,2,1,2,2,2,4,0,2,1,3,2,4,2,1,3,0,4,3,1,3,2,3,3,2,1,3,3,4,3,1,3,2,2,2,0,2,2,3,0,2,1,2,1,2,2,1,1,3,1,2,3,1,1,3,1,2,4,1,1,3,1,3,1,3,3,1,1,3,1,2,1,0,4,1,1,3,0,2,2,3,0,0,1,3,4,0,4,0,1,3,1,4,0,1,0,1,3,4,4,3,4,2,2,2,0,4,2,0,0,2,2,4,3,1,1,0,2,4,0,0,1,4,3,0,1,1,2,3,2,3,4,0,1,1,3,1,2,2,1,2,1,0,1,3,2,0,2,2,1,4,2,4,4,4,0,4,4,4,4,4,0,3,4,3,0,3,3,2,3,1,3,2,3,1,3,1,1,1,2,3,1,1,1,3,3,2,3,1,3,1,2,2,3,1,0,2,1,3,3,1,2,2,4,0,2,0,0,1,2,3,2,1,1,1,2,2,2,2,2,2,3,3,3,1,3,1,3,1,2,1,1,3,1,1,3,3,3,2,3,2,2,2,2,1,2,0,2,2,1,1,0,1,1,1,1,1,3,3,0,2,0,0,4,4,3,3,2,4,2,4,4,4,1,3,0,0,1,3,3,2,2,4,3,3,2,2,1,1,4,2,2,2,2,2,3,0,2,0,0,4,3,4,0,1,1,0,2,2,2,2,0,4,0,3,2,0,0,4,3,2,0,4,4,2,0,3,1,3,1,4,2,2,0,0,0,4,4,0,3,2,3,1,1,2,3,4,4,0,3,2,3,1,1,4,0,2,4,3,2,0,1,0,4,4,2,2,2,4,4,4,4,0,3,1,3,1,3,3,1,2,2,0,3,3,4,0,0,0,0,0,4,4,2,4,1,1,4,1,4,4,1,4,0,0,4,3,3,1,3,4,1,1,1,3,1,0,3,4,2,3,3,3,1,2,3,1,3,3,3,2,2,4,3,1,3,1,4,0,4,4,1,3,1,1,3,3,1,2,2,2,2,1,2,3,2,0,4,1,0,0,3,2,2,2,2,3,2,1,1,1,1,1,1,3,3,3,1,2,3,1,3,4,4,2,3,4,0,4,1,3,2,0,2,0,2,0,2,2,2,0,4,3,3,3,1,4,3,3,3,1,3,3,1,3,4,1,2,2,1,3,2,0,0,0,1,2,1,1,0,2,2,2,0,3,2,1,1,3,2,1,3,1,1,3,1,1,3,0,0,1,4,4,3,1,4,1,1,4,4,3,4,4,4,3,4,1,3,4,2,1,3,1,1,3,3,3,3,4,4,0,1,2,3,0,2,4,2,2,1,3,0,3,0,4,1,2,4,1,0,1,3,3,1,4,3,2,3,1,1,1,1,1,1,3,4,0,2,1,3,1,3,1,3,1,2,1,3,3,3,1,1,2,2,3,1,4,3,3,3,4,0,1,0,3,3,2,1,1,3,2,3,2,2,3,1,2,4,3,3,1,0,1,3,1,1,0,4,0,2,4,1,0,3,3,0,4,3,4,0,3,3,0,4,4,0,1,2,1,2,3,4,1,4,0,0,4,0,0,3,1,1,2,2,2,0,2,2,1,1,1,1,0,4,4,3,3,1,3,3,1,3,1,1,3,1,1,4,4,2,2,2,2,2,2,2,2,0,2,2,2,2,2,4,1,4,2,0,0,3,2,2,1,2,2,2,2,2,4,2,2,2,2,2,3,1,2,2,2,2,2,0,2,2,2,1,2,2,4,2,3,2,2,0,2,2,2,2,2,2,2,2,2,2,2,2,2,2,2,2,2,2,2,2,2,2,2,2,2,2,0,2,2,2,2,2,2,2,2,4,0,0,4,3,3,4,1,1,3,1,3,3,0,4,1,3,1,3,3,1,1,4,3,4,0,4,3,2,1,2,2,2,3,3,1,0,3,1,1,1,3,0,3,1,2,3,2,3,0,4,1,1,3,1,1,3,1,0,2,3,2,2,1,3,1,2,3,3,1,0,2,3,2,3,2,3,1,3,2,3,1,3,1,1,1,1,1,3,1,3,3,3,3,1,1,4,4,1,1,3,1,0,0,0,4,3,1,4,4,0,3,2,4,2,4,2,1,0,0,4,1,1,1,3,3,2,3,4,3,4,1,2,0,4,4,0,0,3,2,3,1,2,3,2,3,2,2,1,3,3,3,1,2,3,1,3,3,0,1,2,1,0,1,2,2,1,1,3,1,4,0,1,1,2,3,1,3,3,1,3,3,1,3,1,2,3,1,4,2,2,3,1,2,2,1,1,1,3,2,0,0,2,2,0,2,0,1,1,3,1,2,1,3,4,1,3,2,3,2,1,1,3,0,4,1,0,1,2,3,3,2,0,2,0,2,2,2,2,3,1,4,1,2,3,2,3,0,1,1,0,2,3,2,1,0,1,2,1,3,2,3,3,0,3,2,3,1,1,0,0,1,1,2,2,1,2,4,1,1,3,1,1,1,3,2,3,2,3,3,4,1,2,0,2,1,1,3,2,1,0,0,4,3,3,3,3,2,2,4,3,4,3,1,3,4,0,3,4,3,0,0,1,4,4,0,2,2,4,0,3,2,0,2,3,4,4,4,4,1,1,1,2,2,0,3,2,0,1,3,0,4,4,4,0,2,1,3,0,1,4,3,3,4,2,1,2,4,4,2,3,0,1,3,3,3,3,2,2,0,4,4,0,1,1,1,0,2,4,0,0,1,2,3,2,0,2,0,0,4,0,0,2,0,2,0,1,4,3,4,4,2,2,2,0,2,1,0,1,4,3,4,2,0,2,2,2,1,1,4,3,4,4,4,4,0,4,0,3,0,1,0,1,1,4,0,3,1,1,0,4,3,4,1,3,0,0,0,0,4,3,4,1,3,0,0,0,4,0,4,0,0,4,0,0,0,0,1,4,1,1,3,0,4,0,3,4,3,4,0,0,0,0,3,0,0,4,4,0,2,4,4,0,0,4,4,4,4,4,0,4,4,4,4,4,4,4,0,0,0,3,1,1,4,4,4,1,4,4,4,4,4,0,0,0,2,0,0,4,2,2,0,0,0,0,0,2,4,0,4,0,2,1,3,3,2,2,2,3,1,2,3,4,1,4,4,1,0,0,4,3,4,2,0,2,1,4,4,1,2,2,2,2,1,3,3,2,2,2,0,0,4,2,2,2,2,2,2,4,1,2,1,1,2,3,1,2,2,1,3,2,2,3,1,1,1,3,1,2,1,3,2,2,2,3,2,0,4,3,3,0,4,0,4,2,1,4,1,1,3,3,2,1,1,2,2,2,2,3,2,2,2,2,2,2,2,2,2,3,0,4,4,0,4,4,0,4,1,1,1,0,1,3,3,3,3,3,1,1,1,3,4,0,4,1,3,0,4,0,1,0,4,4,4,0,0,0,0,4,4,0,0,0,3,0,4,0,4,0,3,4,3,0,1,4,3,4,3,1,1,0,0,3,0,0,0,4,4,4,3,1,1,1,3,0,0,4,1,3,3,4,4,4,4,4,2,0,3,4,4,3,1,4,3,0,1,0,1,1,3,3,1,0,3,3,4,3,1,4,3,1,0,1,1,0,1,3,0,1,1,1,1,0,4,0,0,3,3,4,1,4,1,3,1,1,0,2,4,0,3,4,4,4,4,4,0,1,4,2,4,3,2,0,2,2,2,2,2,0,0,4,1,0,4,2,2,2,4,4,4,2,4,3,1,3,4,1,3,1,4,0,0,3,1,0,4,1,1,2,4,1,1,0,0,0,3,4,4,1,3,2,0,4,1,3,1,2,3,0,2,1,0,1,0,0,2,1,0,0,0,1,1,0,4,1,0,2,4,0,2,3,3,3,3,2,4,3,4,4,0,0,4,4,0,4,4,0,1,4,0,3,3,0,3,2,3,1,1,1,1,1,4,1,3,0,3,1,3,3,4,3,3,1,0,2,4,0,1,0,3,1,3,3,3,2,2,2,2,3,0,0,2,2,1,1,2,2,1,1,3,3,2,1,1,1,4,3,3,1,1,1,2,1,4,3,4,0,1,1,0,1,3,1,1,3,2,1,1,1,3,3,1,1,4,2,1,2,2,2,2,1,3,3,4,3,3,2,3,1,3,0,1,1,1,4,0,1,4,2,0,4,4,3,0,0,1,1,3,1,1,1,4,1,0,3,0,3,3,3,1,1,0,1,3,3,1,3,1,1,2,1,3,3,1,3,2,3,1,1,2,1,3,1,1,2,2,2,2,0,1,3,3,3,4,4,3,1,0,1,1,4,4,3,1,1,3,3,3,3,1,3,1,2,1,0,2,2,2,4,2,2,3,3,2,1,1,3,3,1,1,1,1,3,0,2,1,2,2,2,2,2,2,2,1,3,1,1,3,1,2,3,1,2,2,2,0,2,2,2,2,2,2,2,0,2,2,3,0,0,2,4,2,4,4,0,3,1,3,1,3,2,3,2,1,3,3,3,1,1,3,1,3,2,1,2,4,3,0,3,2,2,2,0,0,2,2,0,3,0,2,2,1,3,1,3,3,1,2,0,0,2,2,0,1,2,3,1,4,1,1,3,3,2,1,1,2,1,3,1,2,3,1,1,1,0,4,0,1,4,2,2,4,0,1,2,1,2,3,2,1,3,3,0,1,1,2,2,1,3,2,3,1,1,2,3,2,1,3,1,1,3,3,1,3,2,2,2,3,2,2,4,2,2,4,3,2,3,2,1,2,1,4,3,2,1,1,3,3,1,3,1,1,2,2,2,2,2,2,0,2,0,0,2,2,2,2,2,0,4,2,2,2,2,2,0,2,2,4,2,1,2,3,3,1,1,3,3,3,1,1,3,3,2,4,3,1,1,1,3,3,1,2,3,4,0,3,1,1,3,0,2,2,0,1,4,0,1,1,1,0,2,1,1,2,4,2,1,1,1,3,1,3,3,1,1,1,3,2,1,4,2,1,3,1,2,0,4,3,3,0,3,3,1,2,1,3,3,3,2,1,1,1,0,1,3,3,1,3,1,1,3,1,3,0,1,3,1,2,2,3,0,3,3,2,1,3,4,0,3,4,2,2,3,2,2,2,4,0,2,4,2,4,0,0,4,2,0,2,4,2,2,2,2,2,2,2,2,2,2,2,2,2,2,2,2,2,2,2,2,2,2,2,0,2,0,2,2,2,2,2,4,2,2,2,2,2,2,2,2,2,4,2,2,2,2,2,2,2,2,2,2,2,2,2,2,2,2,2,4,2,0,2,2,2,2,2,2,2,1,2,2,0,2,4,4,2,2,2,0,0,2,2,4,0,4,0,0,0,2,0,0,2,4,0,0,0,0,4,2,2,2,2,2,2,4,4,2,2,0,4,0,2,0,4,2,2,0,2,2,4,2,2,2,2,2,2,2,0,3,3,2,0,3,0,3,2,2,2,3,2,2,0,3,2,3,1,2,2,1,2,3,2,3,3,4,4,2,1,2,2,2,2,0,3,2,3,3,0,2,3,1,3,1,1,2,2,0,4,0,1,2,1,4,0,2,0,1,2,3,4,0,1,0,1,4,0,3,3,3,1,0,0,0,1,0,1,2,1,3,3,1,1,3,2,2,3,2,3,2,2,2,2,3,4,1,0,3,1,1,1,1,3,0,2,2,1,3,3,3,1,4,1,1,2,2,3,3,1,3,2,2,3,3,1,1,2,2,1,1,0,0,4,3,4,1,1,3,1,1,2,4,1,1,3,4,4,4,0,2,4,2,2,4,0,0,1,3,4,0,4,3,3,1,0,3,1,0,2,1,0,0,0,4,4,1,4,1,3,2,3,3,2,3,2,0,0,2,4,2,2,0,4,4,2,2,0,0,1,4,4,2,3,4,4,4,3,2,3,1,0,3,3,2,1,3,1,4,2,2,1,0,4,1,0,4,4,1,0,4,1,4,3,4,2,2,4,4,4,4,3,1,1,4,1,0,4,1,4,2,3,4,0,4,0,0,3,2,1,1,4,4,0,4,3,0,0,0,3,4,0,4,0,4,1,0,1,3,0,3,1,0,2,0,1,4,1,4,0,3,2,1,4,4,2,3,3,4,0,1,1,0,4,1,1,3,4,0,2,2,2,0,0,1,2,4,3,4,4,1,2,3,3,2,3,1,2,2,3,4,2,1,1,1,4,2,2,0,2,3,3,0,2,3,2,2,2,1,2,4,2,0,4,2,4,0,2,2,0,0,3,2,2,3,4,3,4,3,3,4,3,2,1,1,0,1,0,0,3,2,1,1,1,2,0,4,0,0,3,3,3,3,2,3,3,0,4,4,4,2,2,1,1,4,2,2,2,3,3,2,4,2,3,1,1,1,0,4,3,1,2,2,3,1,4,2,2,2,3,2,2,3,2,0,1,1,1,3,3,1,1,2,2,1,2,1,1,1,3,0,4,4,3,3,3,3,3,3,3,0,1,0,0,3,0,1,4,2,4,1,2,4,1,1,0,1,3,2,3,3,3,2,3,3,1,0,0,3,1,2,2,3,2,2,2,1,1,3,3,2,4,0,1,2,2,3,2,3,2,0,3,4,0,3,4,0,3,1,4,3,3,3,1,1,2,2,1,3,2,1,3,2,2,2,4,4,3,2,2,3,2,0,2,2,2,1,4,1,2,2,1,1,1,1,1,0,2,3,2,2,3,2,1,3,3,1,1,3,1,3,3,4,0,1,1,3,1,1,2,3,1,2,1,0,4,3,0,2,0,2,0,2,1,1,3,4,3,2,1,4,3,3,0,4,2,2,2,4,2,1,4,0,2,2,3,2,4,2,0,3,1,2,1,1,1,3,3,1,2,1,3,0,2,0,1,2,4,1,3,1,4,1,3,2,3,3,1,0,2,2,0,2,3,0,2,4,2,3,0,1,0,1,4,0,1,3,1,0,1,3,2,3,1,1,2,0,4,1,0,2,3,2,2,2,1,3,1,2,1,1,0,3,1,4,3,1,4,0,3,1,2,3,3,3,2,2,2,2,2,1,1,3,1,1,1,1,4,2,4,2,0,3,3,4,0,0,0,2,1,4,1,3,3,2,3,1,0,4,2,3,1,2,2,4,4,1,4,2,1,0,1,3,3,4,0,4,3,1,1,0,0,1,0,0,0,3,1,1,1,1,2,2,0,1,1,3,3,4,4,3,2,3,3,1,1,2,3,1,3,1,3,4,4,1,1,1,2,2,3,1,3,3,3,2,2,1,2,3,3,0,4,1,1,2,3,3,3,1,4,1,4,1,3,0,3,1,1,3,4,1,0,0,2,2,2,0,4,3,2,3,3,0,3,0,1,3,3,2,1,1,0,0,4,0,0,2,3,2,2,1,3,1,2,4,2,4,3,2,2,2,2,2,2,2,3,4,3,4,1,3,2,2,1,4,4,4,4,4,4,0,4,4,3,3,4,0,3,1,1,3,1,4,0,3,0,1,0,3,4,1,2,3,0,3,1,4,3,1,3,4,4,1,1,3,1,4,3,1,3,1,3,4,0,0,3,0,0,3,0,0,4,4,3,1,0,4,4,1,4,4,4,0,1,4,0,3,3,4,0,0,3,1,2,4,0,2,3,1,0,4,2,0,0,0,3,3,0,3,0,1,1,2,0,3,2,4,4,4,3,0,2,4,2,4,2,2,3,4,3,0,4,0,3,0,0,0,2,0,0,3,2,0,4,3,4,3,3,2,3,1,4,4,1,0,1,1,1,0,4,2,3,1,1,1,3,0,3,4,3,0,1,2,4,0,4,4,2,2,2,2,3,0,2,0,2,2,0,3,0,2,0,2,3,4,3,0,1,1,3,2,0,4,4,1,4,3,3,0,4,2,2,2,0,3,1,0,2,3,2,0,0,3,0,4,2,4,4,2,0,1,1,3,3,1,1,2,2,1,1,0,3,0,3,3,1,0,1,0,0,2,1,3,0,3,2,0,2,2,4,2,0,0,0,4,3,3,1,3,2,1,2,4,0,2,0,0,4,4,0,0,4,3,4,4,0,4,4,2,1,2,0,3,2,1,0,2,1,2,3,4,0,2,3,1,0,3,2,2,1,2,4,1,1,3,4,1,3,4,0,3,2,2,4,1,0,3,2,1,2,3,2,3,1,3,2,1,0,0,1,4,2,2,3,1,3,2,2,4,1,2,3,3,3,1,1,4,1,3,3,0,0,2,1,3,3,1,3,1,3,3,1,1,3,3,0,1,1,3,3,1,3,1,4,1,1,3,4,0,1,1,3,1,1,1,1,3,0,3,3,3,3,3,1,0,1,3,3,3,2,3,3,2,1,3,2,4,1,2,4,3,1,0,2,1,0,3,2,2,4,4,4,3,0,2,4,0,4,4,2,4,3,3,4,2,2,3,2,2,1,2,2,0,3,3,3,2,4,2,4,2,3,0,1,1,1,2,1,4,3,3,1,4,3,0,1,4,2,4,0,2,1,2,4,1,2,1,2,1,3,3,4,0,1,4,1,3,1,1,3,3,1,3,2,3,3,0,0,1,3,4,3,0,1,3,2,0,1,3,0,0,4,1,0,3,1,1,0,0,3,0,1,3,4,4,0,4,3,4,2,3,2,0,0,2,2,3,1,0,3,2,1,4,0,4,0,4,3,1,3,0,4,4,1,2,4,4,4,0,4,4,4,0,0,0,0,4,4,4,1,3,1,0,1,0,1,0,0,2,0,4,2,0,2,4,4,0,0,0,0,0,0,1,3,2,4,1,4,1,1,0,0,1,1,4,1,4,2,0,3,2,4,2,4,2,0,3,0,2,0,3,0,1,0,2,4,1,1,2,2,1,1,4,3,0,1,2,4,4,0,1,0,0,2,2,0,2,2,0,2,4,0,1,4,4,3,2,0,0,0,2,0,3,4,0,0,2,4,4,0,0,0,3,0,0,3,4,4,3,4,4,0,3,0,4,0,4,0,1,3,4,0,0,4,2,4,4,1,1,4,0,1,0,4,4,0,3,1,4,3,1,0,0,4,0,1,2,2,4,0,1,4,3,1,2,1,2,0,4,2,2,0,1,4,1,2,2,4,0,4,4,0,0,1,4,2,0,1,4,3,0,0,4,3,0,1,4,4,1,0,1,4,4,4,1,0,4,4,4,3,0,2,0,0,4,4,3,2,3,0,3,3,3,3,2,4,0,4,0,4,1,0,2,4,4,1,4,0,1,4,1,2,0,3,0,1,0,2,2,3,3,3,1,4,1,3,1,1,1,1,3,3,0,3,1,1,4,1,3,0,4,2,4,2,4,2,4,3,0,0,2,2,4,0,0,4,4,3,2,3,4,4,4,0,3,1,1,2,3,1,1,1,4,0,4,3,4,2,1,2,2,2,4,1,1,3,1,1,3,3,4,1,0,1,1,4,3,3,4,1,4,0,2,2,0,0,1,2,1,3,3,2,4,2,2,3,3,0,0,1,3,0,0,3,2,1,1,3,1,3,4,3,1,3,1,0,4,4,2,3,1,2,0,2,1,1,4,4,4,1,1,1,1,0,0,4,1,2,0,1,1,2,4,2,1,3,4,4,3,4,4,4,2,2,3,4,4,0,1,0,0,4,1,1,2,1,4,1,3,0,2,1,3,3,1,3,1,4,2,0,2,2,1,0,2,4,3,2,2,0,3,1,2,3,3,3,4,1,4,3,2,4,1,0,2,3,2,0,3,0,0,2,0,2,2,4,0,0,2,2,2,1,4,2,0,4,3,1,0,1,4,4,2,4,0,3,3,0,1,3,1,2,4,1,1,0,1,1,1,2,0,1,2,3,3,3,2,3,3,2,2,3,2,2,2,3,0,4,1,0,3,2,4,1,3,2,2,0,1,1,3,3,1,3,2,1,0,0,2,4,1,1,4,0,3,3,1,0,1,1,1,1,0,3,1,3,3,4,4,4,4,4,0,4,0,0,4,4,4,2,2,2,4,2,4,2,4,2,2,2,2,2,0,2,0,2,4,2,1,2,3,2,1,4,4,3,1,0,1,1,0,4,4,2,4,2,3,3,2,4,0,4,1,4,1,4,2,2,1,2,3,4,1,1,0,1,3,2,2,2,4,4,1,4,3,0,4,3,2,4,3,1,3,0,0,3,4,3,3,2,3,3,1,4,1,0,1,0,3,4,4,0,4,1,1,4,2,1,3,3,3,4,1,2,1,2,2,4,1,2,1,3,3,1,1,3,1,3,2,4,1,3,2,1,1,1,1,1,1,2,3,2,1,3,1,3,1,4,4,2,3,1,3,1,1,3,3,2,1,4,3,3,2,3,3,1,1,1,3,1,4,3,3,3,1,3,1,1,4,3,3,3,3,1,1,3,3,3,4,1,0,3,2,4,3,1,3,2,1,3,1,2,3,1,3,2,1,2,3,1,3,1,2,2,3,2,1,3,3,1,1,2,2,3,1,3,3,1,2,1,3,3,2,1,3,1,3,1,3,4,2,2,1,2,2,1,1,2,2,1,2,3,1,3,3,2,3,2,2,2,4,1,2,2,1,1,1,2,2,0,2,1,2,1,0,1,0,1,4,1,2,2,1,0,3,3,1,0,1,3,3,3,4,1,4,1,3,1,1,4,3,2,3,4,3,4,3,3,4,1,2,3,2,4,4,4,2,4,2,0,4,2,4,2,2,0,2,2,0,2,2,2,0,2,2,4,2,0,1,4,2,0,2,4,2,2,0,2,0,4,0,2,4,0,2,4,2,2,0,4,4,2,2,0,1,4,4,4,4,1,4,0,4,1,1,4,0,0,4,0,4,0,0,1,0,1,0,4,4,4,0,4,4,0,1,0,4,0,3,4,0,0,0,0,0,0,3,0,0,2,3,2,1,4,4,0,3,0,3,3,3,4,0,4,0,4,2,3,3,3,3,4,0,4,4,0,0,4,4,0,2,0,2,0,0,4,3,0,1,2,0,0,2,0,2,0,4,0,3,0,0,1,4,3,4,0,4,4,0,2,4,2,3,0,1,0,2,3,4,3,2,4,1,3,3,2,4,1,3,2,1,4,0,3,2,1,3,4,3,2,2,2,0,0,4,1,0,1,1,1,3,2,0,3,4,2,4,3,2,4,2,2,2,0,1,3,2,4,1,2,3,3,0,3,1,1,3,1,3,1,0,1,3,2,3,1,4,3,1,4,0,4,3,3,0,3,4,1,3,3,2,1,3,2,3,3,1,1,2,3,4,2,1,3,1,3,1,1,1,0,0,0,3,3,1,1,2,3,3,0,1,0,2,1,1,2,2,3,3,2,4,2,2,3,1,3,4,0,2,1,2,1,3,4,2,3,1,4,2,3,2,1,0,1,3,3,4,2,2,2,1,3,1,3,2,0,3,3,0,2,4,1,0,1,1,1,2,2,2,3,1,4,4,4,4,4,4,1,0,0,4,0,3,4,3,1,3,0,1,3,3,4,1,1,2,4,0,4,1,4,4,3,4,1,0,3,4,1,1,1,0,0,1,3,0,1,4,1,1,1,3,3,4,4,0,1,1,1,1,3,3,4,4,4,0,1,3,2,0,3,3,1,3,4,1,3,3,2,3,0,1,1,1,0,1,1,3,1,2,4,4,3,1,4,4,4,0,0,1,0,4,1,2,1,0,4,2,0,2,0,4,0,4,0,0,3,4,4,1,4,1,3,0,2,1,0,0,1,0,4,1,2,2,3,4,4,0,4,2,2,2,3,3,1,4,2,4,0,4,0,4,4,1,2,1,1,1,1,2,2,1,3,1,2,3,0,2,1,0,4,3,1,3,3,4,1,3,3,1,3,0,3,0,4,4,0,0,0,0,4,2,4,4,0,4,4,4,3,0,3,0,0,4,2,0,0,0,4,4,0,4,0,0,4,0,4,4,0,0,1,4,2,4,2,0,4,4,4,0,0,2,1,4,4,4,4,4,0,0,0,0,0,2,0,4,4,0,4,0,4,4,0,4,0,0,4,0,0,3,0,4,0,0,0,0,4,0,0,3,4,4,4,0,1,4,0,4,4,0,4,0,4,4,0,4,2,0,0,4,0,0,1,0,4,4,2,4,2,4,4,1,0,1,1,0,0,3,0,1,4,1,3,0,4,3,1,3,1,0,1,4,4,2,1,2,3,1,2,0,0,1,3,1,4,2,0,0,1,3,1,1,1,2,0,1,1,3,2,2,1,3,2,1,3,1,2,2,3,2,2,2,2,2,2,2,4,1,3,3,0,3,2,3,0,4,1,1,1,3,0,4,2,2,3,3,2,0,1,2,1,1,1,2,0,1,1,1,2,1,1,3,3,3,1,3,1,3,1,3,0,3,3,0,1,3,4,3,1,1,3,4,3,1,2,0,0,0,0,0,3,0,2,1,1,2,1,3,3,1,3,1,1,3,1,2,3,4,1,3,2,2,2,2,1,1,2,1,0,2,3,1,1,2,3,2,1,4,4,2,1,1,3,3,1,1,1,4,1,0,3,1,2,2,0,0,1,0,3,4,0,1,3,1,3,3,2,4,3,4,3,1,2,1,2,1,4,1,1,0,3,3,3,1,1,3,1,4,0,1,2,4,1,1,1,3,2,2,0,0,1,1,4,3,3,4,4,3,0,1,1,2,1,1,3,3,1,1,1,2,4,1,3,1,1,2,2,0,4,3,3,3,1,4,4,1,4,1,2,4,3,0,1,3,4,1,0,3,2,3,0,1,3,1,1,3,3,1,1,1,1,3,3,3,3,3,2,3,3,2,1,2,3,1,3,1,1,2,1,1,4,3,1,4,3,1,3,4,3,1,3,3,3,4,1,3,1,1,1,2,4,4,1,2,4,3,0,2,1,3,1,3,3,3,3,1,3,1,3,2,1,3,0,2,1,0,0,3,3,1,3,1,1,0,4,1,3,0,2,3,0,2,3,3,1,0,4,2,4,4,0,0,0,0,4,4,0,0,4,0,4,0,0,0,0,0,0,4,0,0,1,3,1,1,3,3,0,0,1,2,2,3,2,3,3,3,3,2,2,2,1,1,2,4,1,2,2,0,0,3,0,3,1,1,3,3,0,0,4,1,3,3,0,0,0,0,4,3,1,0,0,3,3,3,0,3,0,2,2,4,0,2,2,1,2,0,0,0,4,3,2,4,4,0,0,4,4,0,0,0,4,4,0,1,4,4,4,0,0,2,2,2,2,2,2,2,2,4,0,4,4,0,2,2,0,2,4,1,2,2,0,0,0,2,2,4,2,2,4,2,0,2,0,0,2,2,0,2,2,0,2,0,0,4,4,0,2,4,2,4,2,2,0,0,2,0,2,2,0,1,2,0,0,1,0,2,2,3,4,0,3,2,0,1,0,1,4,2,2,2,2,2,2,2,1,2,1,2,3,1,2,4,1,2,0,2,3,4,2,2,3,0,0,0,2,3,0,3,4,0,0,0,4,4,3,3,0,3,4,4,1,1,4,1,3,1,4,3,1,3,3,0,4,3,3,3,4,3,4,0,4,4,4,3,1,2,2,3,1,0,3,2,1,3,3,3,1,3,3,2,3,3,4,0,0,2,3,4,3,3,1,3,2,1,2,4,1,3,4,1,4,2,2,3,2,3,3,3,4,2,2,2,4,2,0,3,0,2,3,4,3,4,4,0,0,1,1,3,3,2,2,3,1,2,3,3,4,1,2,3,0,3,3,1,1,0,3,2,3,1,1,3,4,3,2,1,1,3,1,4,3,2,3,1,2,1,3,1,3,3,3,1,3,1,3,3,3,3,3,4,1,3,1,1,3,1,3,0,1,2,1,3,3,3,4,2,3,1,1,1,1,1,3,3,1,0,2,3,2,0,2,2,4,1,1,3,1,1,1,2,1,3,0,2,3,1,3,3,1,3,2,3,1,3,3,3,1,1,3,3,1,4,2,0,0,2,0,3,1,1,4,1,3,0,2,0,4,1,1,1,1,4,1,1,4,4,1,1,3,2,1,1,1,3,3,4,3,4,0,1,4,4,3,2,3,2,1,1,3,3,2,2,3,3,2,2,3,1,2,2,2,2,2,1,3,1,3,3,2,3,1,1,3,1,1,2,0,1,0,1,2,2,4,1,2,2,2,2,1,3,2,3,4,2,2,4,2,1,1,0,4,4,0,2,4,2,1,3,1,1,2,3,1,4,1,0,1,1,3,3,3,3,3,3,3,3,2,2,2,3,2,2,3,1,0,0,2,2,0,4,3,2,0,2,3,2,2,3,3,3,2,1,1,4,2,2,4,3,1,2,2,1,3,1,3,3,4,1,2,3,1,1,1,4,3,0,4,3,1,1,2,0,3,2,0,0,0,0,4,2,4,3,2,1,4,0,2,1,3,4,0,1,1,3,2,1,2,2,3,1,0,4,3,1,2,2,2,2,1,3,3,2,2,3,0,3,2,4,1,2,3,1,1,1,1,1,4,1,0,1,2,3,0,3,4,1,2,2,2,3,3,3,0,4,1,4,1,0,4,3,0,2,2,1,1,3,0,4,4,4,0,3,2,2,1,3,4,1,1,1,2,1,2,0,1,1,3,0,0,1,4,2,1,1,0,2,2,3,1,1,0,2,4,0,2,2,0,1,0,1,1,4,1,4,4,1,3,4,0,0,2,2,3,3,3,2,0,0,0,4,1,3,1,4,0,3,2,2,2,4,4,3,1,4,3,3,3,2,4,3,2,2,1,1,2,1,0,1,4,0,2,3,3,4,3,3,1,1,3,3,1,0,1,4,4,3,2,0,3,4,4,3,2,0,3,2,1,4,0,3,3,4,0,4,2,2,1,3,0,1,3,0,2,3,0,1,3,2,0,3,2,3,2,4,1,0,3,2,2,2,4,3,1,3,3,0,1,3,3,2,3,0,4,1,3,1,3,1,3,0,3,1,3,3,1,3,1,0,1,1,0,1,4,2,3,2,4,1,2,2,2,3,3,3,2,4,1,4,0,1,1,3,0,3,1,3,2,0,1,1,1,3,3,3,4,1,3,3,1,3,1,2,2,3,1,0,3,1,1,4,4,2,0,1,1,1,4,3,4,3,1,3,4,4,0,1,0,4,0,0,0,4,1,1,2,3,2,0,0,4,2,3,4,1,3,2,2,3,1,2,1,2,2,1,1,1,0,0,4,0,0,0,0,0,4,0,4,4,4,0,0,4,0,0,4,4,4,0,1,2,1,2,3,1,2,3,1,1,3,1,1,1,3,3,3,1,2,3,2,1,1,3,4,4,0,4,4,4,4,0,4,4,4,0,4,0,1,1,4,4,1,1,2,2,1,4,0,0,0,0,4,4,4,0,0,3,1,1,3,1,3,3,1,4,0,3,4,4,0,0,0,4,3,2,4,4,1,0,4,0,0,4,0,4,0,4,0,4,0,4,4,0,0,4,4,2,2,0,0,3,2,1,4,4,1,3,1,0,4,1,0,4,3,3,1,4,1,3,0,0,3,2,2,3,1,3,2,1,2,0,0,4,4,0,4,0,4,4,4,0,3,0,3,0,2,0,0,4,4,2,1,0,4,4,0,0,3,4,2,4,4,1,0,3,3,3,4,1,0,1,0,0,1,3,0,4,0,0,4,4,1,4,0,0,4,0,0,0,3,0,3,0,0,4,0,3,4,4,4,4,4,3,1,2,1,4,0,3,1,0,0,0,4,1,0,1,0,4,0,1,0,2,1,0,4,4,3,4,4,4,0,3,4,4,1,1,4,4,1,1,3,1,4,0,2,3,1,3,3,4,3,2,0,2,1,3,3,2,1,3,1,3,2,2,2,2,4,3,3,3,1,1,3,1,2,1,2,1,4,1,4,3,1,1,0,1,0,4,4,4,2,2,1,1,1,4,1,3,0,0,3,1,3,1,2,3,2,3,1,3,4,0,1,3,2,2,3,1,3,3,1,0,3,3,1,3,1,3,1,3,1,1,2,2,3,3,0,2,1,2,1,1,1,3,2,0,2,1,3,4,3,3,3,1,0,3,2,3,1,3,2,4,3,0,4,4,4,2,2,0,4,0,0,0,4,0,3,3,1,3,4,1,0,0,0,3,0,0,4,3,3,0,2,0,2,0,0,1,3,4,1,1,4,2,2,3,1,4,1,1,3,3,0,4,4,2,1,3,1,3,4,3,0,0,4,1,2,1,1,2,0,4,0,1,0,4,1,3,1,2,2,3,1,3,0,1,3,4,0,4,1,0,4,0,4,0,1,3,0,1,1,1,3,1,1,4,1,3,4,1,0,2,2,3,3,2,2,2,1,3,0,4,2,2,4,1,1,2,3,1,2,3,4,4,2,2,1,2,2,4,3,2,0,2,1,2,1,1,1,2,3,3,3,4,2,1,0,0,4,1,4,0,0,4,4,4,4,0,1,3,1,2,4,4,0,3,3,4,4,4,4,0,2,0,2,0,4,3,1,1,2,3,4,2,1,1,2,1,0,2,3,3,0,0,3,3,3,4,2,2,1,0,4,1,2,2,4,4,0,4,4,4,1,0,0,0,0,2,4,1,0,4,0,2,4,3,4,0,1,0,0,2,0,4,0,4,4,4,3,4,3,0,1,3,3,3,1,3,3,0,0,1,2,2,0,0,3,1,3,4,3,0,3,3,0,0,3,4,0,1,0,1,3,0,1,3,3,3,3,4,0,3,1,4,1,1,4,2,1,1,4,1,1,1,3,3,4,0,1,2,0,3,4,4,1,2,1,2,4,2,3,3,4,4,1,3,2,1,2,2,1,1,2,1,1,3,4,3,2,2,2,1,1,2,4,2,2,0,4,3,1,1,0,2,1,0,1,0,1,4,4,3,0,1,3,3,4,1,3,1,4,3,2,3,0,4,2,3,1,1,3,1,1,3,2,1,4,3,4,0,1,3,2,4,4,3,0,3,1,4,4,0,4,1,1,1,4,1,1,3,1,3,3,2,2,1,1,3,3,0,3,2,1,1,1,1,2,1,2,2,0,1,3,3,1,3,3,1,1,0,3,1,1,2,2,2,1,3,3,3,2,1,3,2,3,1,3,3,3,3,3,3,1,2,2,2,4,0,1,1,0,1,3,0,2,1,2,1,2,1,2,4,4,3,0,2,3,3,3,1,4,3,3,1,3,1,3,1,1,1,0,4,0,2,4,2,4,2,1,2,4,3,1,3,4,2,2,0,2,0,2,4,0,1,2,0,1,0,2,2,2,3,0,0,0,2,2,3,2,2,2,2,2,2,2,2,3,2,3,2,2,2,2,2,1,2,2,2,2,2,2,2,2,2,2,2,2,2,2,3,2,2,2,2,2,2,2,2,4,1,2,0,4,0,1,3,2,2,2,2,2,2,2,3,2,2,2,0,0,0,2,2,2,2,2,1,2,2,2,2,3,2,2,2,2,2,2,1,2,2,2,2,2,1,0,2,2,2,0,2,2,3,2,0,3,2,2,2,3,2,3,1,2,1,2,2,4,0,4,0,2,2,2,0,2,2,2,2,2,2,4,2,2,4,0,1,2,2,2,2,2,2,2,2,2,2,2,2,2,2,2,2,4,2,2,3,0,0,2,3,0,1,1,4,2,1,2,0,3,3,4,3,4,1,0,4,3,4,3,3,3,0,4,1,4,1,3,1,0,0,0,0,1,1,3,4,1,4,0,0,0,3,4,1,4,0,1,2,4,3,0,1,1,4,2,4,0,4,3,4,2,0,4,4,4,0,4,3,0,2,4,4,1,2,0,3,3,1,3,1,0,4,0,4,3,0,2,2,4,4,4,4,4,0,1,4,0,4,1,4,3,2,0,2,2,2,1,1,1,3,1,1,1,0,1,4,4,0,4,0,4,1,4,1,3,3,0,3,3,0,4,4,0,4,0,2,4,1,1,0,4,1,4,4,0,1,0,0,3,3,4,3,0,3,4,3,2,1,4,1,3,0,3,4,4,2,2,0,2,4,4,4,4,0,2,2,3,2,0,4,2,2,3,3,3,1,3,0,1,3,1,0,1,4,4,0,1,4,0,0,1,2,3,3,3,2,4,1,1,3,3,3,3,3,3,2,2,3,1,3,2,1,3,0,3,2,2,3,3,1,3,1,1,0,3,0,1,4,2,3,1,1,0,4,4,4,1,3,1,4,0,1,4,1,1,3,4,0,1,0,0,3,3,1,1,2,2,0,4,3,2,4,1,4,0,3,2,0,0,0,0,3,3,3,0,3,3,0,0,2,3,1,0,3,2,2,4,1,1,2,2,2,1,2,4,0,1,0,3,3,0,4,4,0,4,1,4,0,2,3,1,1,1,4,3,4,2,3,0,0,4,4,4,4,4,4,0,4,4,4,4,4,0,4,2,4,2,3,0,1,0,4,3,2,1,4,4,0,3,0,1,4,1,2,2,2,0,4,0,4,2,3,4,0,2,2,2,0,4,2,0,3,3,3,4,0,4,2,0,0,2,3,1,3,3,4,2,0,2,0,4,4,0,0,3,1,0,0,0,1,0,2,2,4,0,0,1,0,3,3,2,4,2,2,1,2,0,1,3,3,2,0,4,3,3,1,1,0,2,3,0,1,3,0,0,1,2,1,4,4,4,3,3,4,1,3,1,2,1,1,4,0,3,3,3,4,1,2,3,3,3,4,3,1,2,2,3,4,1,2,4,3,3,2,1,1,2,1,1,2,3,1,2,1,4,3,4,4,0,0,1,4,1,1,3,3,1,2,2,3,0,2,1,1,1,1,1,1,3,3,3,3,3,1,3,3,3,2,4,1,1,3,3,1,3,1,3,2,0,1,2,1,1,1,1,3,1,4,4,1,1,1,4,3,2,3,2,2,2,4,2,1,2,1,1,1,1,3,1,1,1,3,1,1,3,2,1,4,1,4,1,3,1,3,1,3,1,1,3,3,3,3,1,3,0,1,3,3,0,4,0,3,2,3,3,4,3,3,1,2,1,2,2,1,3,4,1,1,0,1,0,0,2,4,4,1,2,2,2,3,1,1,3,2,2,1,0,3,3,1,3,1,3,3,1,2,3,2,2,4,4,1,2,4,3,2,0,3,2,3,2,1,1,1,2,1,0,3,0,0,2,2,2,2,2,2,1,2,2,1,1,3,1,1,3,3,3,1,1,2,1,2,1,4,2,2,3,3,4,1,0,3,1,1,2,1,1,1,0,3,3,3,1,4,2,3,0,2,2,1,4,0,3,0,3,1,2,1,4,4,2,1,0,0,1,4,0,0,0,3,1,3,1,1,3,4,3,0,4,1,4,0,4,2,3,4,2,2,0,1,1,1,0,0,0,4,4,3,2,0,3,1,3,1,2,3,1,4,2,3,3,3,4,1,4,3,1,0,3,2,2,2,4,0,3,1,4,2,1,0,3,3,1,4,4,4,0,4,1,3,0,1,4,1,4,3,3,4,0,3,0,3,0,3,1,0,4,4,0,1,1,4,4,2,4,1,2,0,2,2,0,3,4,3,4,4,4,1,2,0,3,0,3,3,0,3,3,1,4,2,2,1,0,4,1,1,0,2,0,0,3,3,2,0,4,4,4,0,4,3,3,3,1,4,3,4,2,1,1,4,0,2,0,1,1,3,0,1,1,3,2,3,1,2,2,2,3,1,1,1,2,1,3
B123,0,1,1,4,4,0,4,4,3,1,4,4,2,0,0,3,1,0,0,4,4,0,1,0,0,4,0,1,3,3,1,1,3,3,2,2,3,1,4,1,1,3,1,0,0,0,3,1,4,4,3,3,3,1,3,1,3,0,0,4,4,2,1,1,3,1,0,1,3,1,1,4,4,0,3,3,1,1,0,0,4,2,4,1,2,2,2,2,4,2,2,2,2,4,2,4,2,2,2,4,2,0,4,2,2,2,0,2,2,2,2,4,0,2,4,0,2,2,0,0,2,0,2,2,4,0,2,3,3,3,0,2,3,1,3,0,1,1,3,1,4,1,1,3,3,0,3,3,2,2,3,1,2,2,2,1,1,1,1,2,3,4,0,4,1,3,3,1,3,1,0,0,4,3,3,3,3,4,0,1,2,3,1,4,0,3,0,2,2,1,3,1,1,3,4,1,0,2,2,1,0,4,1,0,1,0,4,3,3,1,0,0,2,3,1,1,3,2,0,2,2,2,3,2,4,0,0,0,0,0,4,2,3,3,3,2,4,3,4,3,3,3,0,2,1,1,3,1,2,0,0,1,3,2,3,2,1,1,2,2,3,1,3,3,3,1,3,3,3,1,3,3,3,1,4,4,3,3,1,1,4,0,0,4,4,4,4,0,4,2,0,1,4,4,0,0,4,3,1,0,0,0,0,2,0,0,4,4,4,4,4,0,4,4,4,0,2,0,0,2,4,4,2,0,2,0,4,2,4,2,2,0,2,2,4,0,4,2,4,4,0,2,4,4,2,4,0,3,4,1,3,4,0,3,3,0,1,3,1,1,1,3,2,2,1,3,1,3,1,4,3,1,2,4,3,3,1,2,2,4,2,2,2,2,4,2,2,0,0,2,0,4,2,0,2,0,1,3,0,3,1,4,0,0,1,1,1,1,3,4,0,0,3,1,0,1,4,3,4,1,1,4,0,2,2,1,4,0,2,1,1,2,4,4,1,3,4,4,2,3,4,1,1,2,2,3,0,3,1,0,1,2,1,3,2,3,1,0,4,1,3,3,3,3,2,1,1,3,1,1,1,3,2,4,2,0,1,0,0,3,1,0,3,0,2,2,0,2,0,0,0,0,2,4,2,4,4,2,2,0,2,2,0,0,4,2,1,0,3,0,1,4,1,3,0,4,0,1,3,4,0,3,1,1,1,1,3,1,3,3,2,2,4,3,3,1,4,2,1,3,2,4,3,1,3,1,1,2,3,2,3,1,4,2,3,0,3,2,3,4,4,2,3,2,1,2,1,1,4,1,3,0,3,2,3,0,1,0,3,1,2,1,3,1,3,2,2,2,1,1,0,1,1,0,4,0,2,2,2,0,0,1,2,2,0,4,0,3,1,4,2,1,1,1,1,2,1,2,2,1,2,0,1,4,3,0,3,2,2,1,3,4,2,4,1,2,1,2,0,2,0,0,3,3,0,1,0,2,4,3,2,0,3,4,1,1,0,1,3,1,1,2,4,2,3,3,3,3,1,2,2,2,2,2,4,1,1,2,2,1,2,4,2,3,1,3,1,4,3,4,1,3,1,1,1,1,3,1,2,2,2,1,2,2,2,3,3,3,1,3,1,3,3,1,2,3,2,1,2,3,0,3,4,2,4,2,4,2,2,2,2,2,2,2,2,1,1,2,2,3,2,2,3,1,3,3,2,4,0,1,3,3,4,2,2,0,3,4,0,4,1,1,3,4,2,2,3,1,3,3,0,4,4,2,3,0,4,2,3,2,1,1,3,3,3,3,2,2,2,4,3,0,4,3,1,1,3,0,2,2,2,3,1,3,1,0,2,0,2,0,4,4,3,2,4,1,2,0,3,1,4,0,3,3,1,1,0,0,4,0,0,0,0,3,0,0,3,1,3,4,4,4,1,3,0,4,0,3,1,1,0,3,3,3,2,2,4,1,0,1,3,3,1,0,3,3,1,1,3,4,0,3,3,3,1,4,4,3,1,3,1,1,2,3,1,3,1,1,2,3,3,3,1,0,1,3,3,2,1,1,2,2,2,4,3,1,3,3,3,2,0,1,3,2,1,3,1,2,3,3,1,2,2,4,0,3,2,4,3,3,1,2,4,4,4,2,2,2,0,3,2,1,3,1,0,3,3,4,4,3,1,3,2,1,0,3,3,3,1,1,3,1,4,3,3,3,3,1,0,3,2,3,2,2,1,3,2,1,4,1,4,1,3,3,3,0,1,1,4,1,3,3,1,1,1,1,4,3,3,2,3,3,0,3,1,1,1,0,3,0,1,0,0,1,1,1,1,0,2,3,0,1,2,2,4,2,2,2,3,2,2,2,0,1,1,0,0,4,3,4,2,4,1,0,3,2,1,2,0,4,1,4,4,2,3,4,3,3,2,3,4,3,0,1,1,3,4,0,1,3,0,1,3,2,2,4,1,1,4,1,2,0,0,4,1,4,2,4,3,3,3,2,1,1,3,3,1,3,4,1,1,4,3,2,3,1,2,0,3,4,1,2,1,1,3,1,1,3,3,1,4,4,1,3,1,1,2,3,4,3,3,0,1,3,3,1,4,1,3,4,3,0,2,1,1,0,3,4,2,1,1,3,3,4,1,4,0,1,3,0,4,0,3,1,3,4,1,2,4,3,1,3,2,3,1,0,3,1,0,3,3,1,1,0,1,3,4,4,3,3,3,1,1,4,4,0,0,0,0,2,2,2,2,2,4,4,0,0,0,2,4,2,2,4,2,2,2,2,4,4,1,2,4,0,4,4,2,2,2,1,3,0,2,4,2,2,0,2,2,4,0,2,0,2,0,0,2,1,4,3,0,3,1,0,3,0,4,2,1,4,2,1,2,1,1,1,0,0,1,0,1,2,0,2,2,0,4,3,0,2,2,2,2,0,0,3,0,2,0,4,2,3,0,2,2,3,2,1,4,1,0,1,2,0,4,2,4,4,3,2,0,0,2,1,2,4,0,4,0,3,0,1,1,3,0,1,0,3,3,2,4,2,0,4,4,1,3,1,2,4,1,2,1,2,2,2,2,2,2,2,4,2,1,2,4,2,3,2,2,2,0,3,0,4,3,2,3,0,0,3,4,4,2,4,4,4,2,0,2,2,4,0,2,3,4,2,0,2,1,3,4,4,0,3,4,1,0,4,3,2,2,3,1,0,4,0,2,0,3,4,0,3,3,4,2,1,3,2,2,1,1,1,1,3,1,1,2,1,1,1,1,3,3,3,3,3,1,3,3,4,3,1,3,3,3,0,3,0,2,2,2,2,0,3,1,2,4,0,3,4,2,3,2,1,2,2,2,2,2,2,1,1,3,4,4,0,0,3,2,0,1,4,0,1,3,4,3,4,3,3,2,4,3,0,1,4,0,2,4,1,1,3,0,3,0,1,0,2,0,3,1,1,4,1,2,1,2,3,0,1,1,1,4,1,3,1,3,0,4,0,3,0,0,0,0,0,4,3,4,3,0,4,0,0,0,0,4,3,3,1,3,1,0,1,3,1,2,1,3,4,0,1,2,0,1,2,3,3,3,2,4,3,3,1,1,1,2,3,1,1,3,0,3,1,2,0,1,2,4,1,1,3,2,4,0,1,2,3,3,3,1,1,4,2,2,3,3,1,4,4,3,4,3,0,1,0,1,0,4,4,0,3,4,0,4,4,4,0,0,0,4,0,4,0,0,3,4,0,0,0,4,4,0,4,4,2,2,4,2,2,2,0,0,0,0,4,1,4,1,3,4,3,3,2,1,3,3,0,4,4,3,4,0,1,1,3,0,4,4,4,2,3,4,2,1,2,0,0,4,1,0,3,0,4,4,0,0,0,0,1,1,1,1,4,0,4,3,2,4,2,2,3,4,4,2,4,2,4,4,3,0,1,3,4,0,2,4,1,2,1,3,3,3,0,1,3,3,1,4,1,1,3,0,3,3,3,3,1,0,4,0,4,1,1,4,4,1,3,4,2,0,4,4,4,2,0,3,3,3,4,4,1,1,3,3,2,1,2,1,3,0,0,0,0,4,1,1,0,0,0,0,3,4,4,3,4,4,0,0,3,0,3,3,2,4,1,1,2,3,1,3,2,4,3,1,3,3,4,2,3,2,3,3,3,3,1,2,3,0,0,4,0,4,1,3,1,2,0,1,1,1,3,2,0,2,4,1,2,2,3,4,2,3,2,1,3,0,2,1,2,2,2,3,1,2,1,4,1,3,2,0,2,1,3,2,0,4,1,3,4,3,0,4,4,4,4,0,3,1,1,3,2,3,1,3,1,1,0,1,2,3,1,1,1,2,2,3,3,2,1,3,2,1,4,1,1,3,1,3,2,2,3,1,1,3,1,3,1,1,3,2,1,3,1,3,2,3,1,1,2,3,3,1,3,1,1,3,1,3,1,0,1,0,3,3,3,4,4,2,2,2,0,4,2,0,0,2,2,4,2,0,2,2,2,2,2,0,0,4,2,0,3,0,1,1,1,1,4,0,2,0,1,2,3,3,1,1,1,0,1,2,1,1,1,1,1,4,3,4,4,4,0,3,4,4,4,4,0,2,4,4,0,4,4,1,3,1,4,3,3,1,3,1,1,1,2,3,1,2,1,3,3,1,2,1,3,1,1,3,3,1,0,2,1,2,3,0,3,1,3,0,2,1,1,1,1,4,1,1,1,1,2,2,2,1,2,2,3,3,3,1,3,1,3,1,2,0,2,3,1,1,3,4,3,1,2,2,3,3,1,1,1,0,3,3,2,2,0,1,1,1,1,1,3,3,0,3,0,0,4,4,3,4,3,4,3,4,4,4,2,4,0,0,1,3,4,3,2,4,3,4,1,1,0,1,4,1,0,3,3,2,3,0,3,0,0,4,1,4,0,0,1,0,2,1,2,2,0,4,0,3,2,0,0,4,2,1,0,4,4,3,0,3,2,3,2,4,1,3,0,0,0,4,3,0,2,3,3,1,1,2,3,4,3,1,3,2,2,2,1,4,0,2,4,3,1,0,1,0,4,3,3,1,3,4,3,3,3,1,2,0,2,3,3,3,0,2,1,1,2,2,4,1,1,1,1,1,3,3,1,3,3,2,3,3,3,3,2,3,1,1,3,1,2,2,2,3,2,2,3,2,0,1,4,3,1,4,1,1,2,1,4,0,4,2,4,1,1,3,3,0,2,0,3,0,4,4,1,3,0,0,3,2,1,3,2,1,2,2,2,2,3,0,4,2,0,0,2,0,0,2,2,2,2,0,0,0,0,0,0,4,4,4,0,2,4,2,2,4,4,2,4,4,0,4,2,2,2,0,2,0,2,0,2,2,2,0,4,2,2,2,2,4,4,2,2,2,2,2,2,3,3,3,1,3,3,4,3,1,1,1,2,2,2,2,1,3,3,3,1,2,2,2,2,2,2,2,2,1,2,2,2,2,2,1,1,0,3,3,2,2,4,2,2,4,4,2,3,4,3,3,3,2,2,3,1,1,3,1,1,2,2,3,3,4,2,1,2,1,3,1,3,3,1,3,1,2,1,3,1,3,1,3,3,1,1,1,3,3,1,4,2,3,2,1,2,2,2,2,2,3,4,0,1,2,4,1,4,1,4,1,3,0,3,3,3,1,1,2,2,3,0,4,2,4,2,4,0,1,0,4,3,2,1,0,2,1,3,2,2,3,0,2,3,3,4,1,1,1,4,1,0,0,4,0,2,3,3,0,1,2,1,3,1,2,0,3,3,1,4,3,0,1,2,0,1,3,4,1,3,2,0,3,0,1,2,3,2,3,2,3,1,1,3,1,1,1,1,0,4,3,3,2,2,2,2,2,4,0,2,3,1,1,3,3,2,3,2,2,2,3,2,2,0,3,2,1,3,2,3,1,3,3,0,1,3,2,1,1,3,1,3,1,2,3,1,2,2,3,1,3,1,2,2,2,2,3,0,1,3,2,1,2,3,2,2,3,1,2,0,1,2,2,2,3,1,3,3,2,3,1,3,1,2,1,2,3,2,3,2,1,2,2,2,2,1,2,3,1,2,2,1,2,2,1,3,1,1,3,1,1,4,3,2,1,3,1,1,1,3,3,1,3,1,1,3,3,3,3,3,0,4,2,1,2,3,1,3,2,3,1,0,1,1,0,0,3,0,3,0,3,4,3,3,0,4,1,1,3,0,1,3,0,0,1,3,1,3,1,4,0,1,3,4,0,0,1,4,1,4,1,3,1,4,3,4,0,3,0,1,1,1,0,3,1,3,3,3,3,1,3,3,4,3,3,1,2,1,0,1,3,2,2,4,3,0,2,3,3,3,4,3,2,1,1,4,2,1,0,2,2,3,3,3,2,4,0,3,1,3,3,1,1,3,2,3,1,2,3,3,4,2,2,1,3,3,3,1,2,3,1,3,3,0,1,2,1,0,1,2,2,1,1,3,0,4,0,2,1,3,3,2,2,3,1,2,3,1,3,1,1,3,3,4,2,2,2,2,2,2,2,2,2,4,2,0,0,2,2,0,2,0,2,0,2,2,2,0,2,4,2,2,2,2,2,0,2,2,0,4,0,0,2,2,2,1,3,0,1,0,1,3,1,1,1,3,4,0,3,1,3,1,0,3,0,0,3,4,3,0,0,1,3,2,2,3,3,2,2,4,0,2,1,0,2,0,0,2,1,3,2,1,4,2,2,3,2,2,2,2,1,2,3,3,3,4,2,3,0,1,1,1,2,1,2,0,0,4,2,2,2,2,3,3,4,3,4,3,2,2,4,0,2,4,2,0,1,2,4,3,0,3,1,4,0,3,3,0,1,1,4,3,4,4,4,1,3,3,1,0,3,3,0,1,3,0,4,4,3,1,1,1,3,0,1,3,3,3,4,3,1,2,4,3,2,3,0,1,1,2,3,4,1,2,1,4,3,0,1,1,2,2,1,3,1,1,1,2,3,4,2,0,0,1,4,0,1,0,0,0,0,1,2,1,2,4,2,4,4,1,0,1,1,1,2,3,4,2,0,0,2,0,3,2,4,3,4,4,4,4,1,4,0,3,1,3,0,2,1,4,0,2,2,3,0,4,3,4,2,1,1,0,1,0,3,3,4,2,1,0,0,2,3,0,3,0,2,4,1,0,2,0,3,4,3,2,1,1,4,0,2,4,1,4,0,0,0,1,1,0,1,4,4,1,1,4,3,1,1,4,3,4,3,3,0,2,2,4,4,4,3,4,1,0,0,1,2,3,4,4,3,3,4,4,3,3,4,2,0,0,0,1,1,4,0,2,0,0,0,1,2,2,4,0,4,0,4,3,2,2,1,3,0,1,2,4,2,4,1,4,4,1,0,0,4,3,4,4,0,0,2,4,4,1,0,0,1,1,2,2,2,0,3,3,0,0,3,1,2,1,2,2,3,3,1,0,1,1,0,2,1,2,1,1,3,1,4,1,2,3,2,2,2,0,2,2,0,0,0,2,4,0,4,1,1,1,4,0,4,0,2,4,1,3,2,1,0,2,4,4,4,3,4,1,0,4,1,3,1,0,1,4,1,1,0,4,3,1,4,4,0,4,1,1,1,0,1,2,3,2,3,3,2,1,1,3,4,0,4,2,2,0,4,0,2,1,3,3,4,1,1,0,1,4,4,1,1,0,2,0,3,1,4,1,3,4,2,0,1,4,3,4,3,1,2,0,0,2,0,0,0,4,4,3,0,3,3,4,1,0,1,3,3,3,2,4,3,4,4,3,2,0,3,4,4,2,1,4,3,0,1,0,2,1,2,3,2,0,3,2,4,3,2,4,3,2,1,1,1,0,2,2,0,1,1,2,1,0,4,0,0,3,2,4,2,4,1,3,1,2,1,2,4,0,3,4,4,4,4,4,0,1,4,3,3,3,2,0,2,3,3,3,2,0,0,4,2,0,3,2,1,1,4,4,3,2,4,4,1,4,4,1,4,0,4,0,0,4,1,0,4,0,0,1,4,0,2,0,0,0,3,4,4,1,3,1,1,4,0,3,1,3,4,0,1,1,0,1,1,0,2,1,0,0,0,0,0,0,4,1,0,2,3,1,1,4,2,3,2,1,3,2,3,3,0,1,4,3,0,3,4,1,3,1,0,3,3,1,2,2,3,1,0,2,1,1,4,1,4,0,3,1,3,3,3,3,3,1,0,1,4,0,1,0,3,2,2,4,2,2,2,2,1,4,1,1,3,2,0,0,1,2,0,0,4,4,2,0,0,2,3,2,4,0,0,2,2,2,4,1,3,1,3,2,1,2,1,2,0,3,1,0,2,2,2,4,0,1,3,1,0,2,2,2,2,0,1,4,3,4,4,3,3,1,4,1,2,1,1,3,1,2,3,1,1,3,3,2,1,1,2,1,2,2,2,2,3,2,1,2,1,2,2,3,1,2,1,1,3,3,1,3,1,1,1,0,4,3,1,3,1,3,0,3,3,0,1,3,3,3,1,3,3,1,2,3,2,3,3,3,2,2,1,2,1,3,3,2,2,0,1,2,4,2,0,4,1,3,1,0,2,3,3,3,2,2,2,2,2,2,0,4,2,2,2,2,1,2,1,1,2,3,3,1,2,3,2,1,0,4,0,2,2,2,1,3,1,3,1,3,0,3,1,3,1,3,3,1,0,3,3,4,0,0,2,4,2,4,4,0,3,1,3,1,3,2,3,2,1,3,3,2,2,2,2,0,2,2,2,2,4,3,0,3,2,3,2,1,1,1,1,1,3,0,3,3,1,3,1,3,3,1,2,0,0,2,2,1,1,1,4,1,3,1,1,3,2,2,1,2,2,1,3,1,2,3,2,2,0,1,3,1,1,3,2,2,3,0,0,1,1,1,2,3,0,3,3,1,1,1,1,1,1,2,1,2,1,2,3,4,1,0,3,2,2,4,2,0,4,3,1,1,4,2,4,4,0,0,4,2,0,3,2,1,1,0,4,3,2,2,0,4,3,0,4,0,3,0,4,4,0,4,0,0,0,0,0,0,0,0,4,0,0,4,4,0,1,3,2,0,4,3,4,4,2,4,2,2,2,2,3,2,2,1,1,2,2,3,4,2,2,2,2,2,2,2,1,3,4,0,3,1,1,3,0,2,2,0,1,4,0,1,1,2,0,2,0,2,2,4,2,2,1,1,4,2,2,2,2,0,2,2,2,2,4,3,2,3,2,2,0,4,2,4,0,3,4,2,1,1,3,4,3,1,1,1,1,0,2,2,3,2,2,1,1,2,1,4,0,0,3,2,3,1,2,0,1,3,0,0,3,4,0,1,4,2,3,3,3,1,2,4,0,2,4,2,4,0,0,4,2,0,2,4,2,2,2,2,2,2,2,2,2,2,2,2,2,2,2,2,2,2,2,2,2,2,2,0,2,0,2,2,2,2,2,4,2,2,2,2,2,2,2,2,2,4,2,2,2,2,2,2,2,2,2,2,2,2,2,2,2,2,2,4,2,0,2,2,2,2,2,2,2,1,2,1,1,2,4,3,2,2,2,0,1,1,2,4,1,3,1,0,0,1,1,0,3,3,1,1,0,1,3,3,3,2,1,2,2,3,3,2,2,1,4,1,1,1,3,2,2,1,2,2,3,2,3,2,2,2,2,3,1,2,2,2,0,4,0,2,2,2,2,2,2,2,0,2,2,2,2,2,2,0,2,2,2,2,2,4,4,2,0,2,2,2,2,0,2,2,4,2,0,2,2,2,2,2,0,2,2,1,4,1,1,0,1,4,1,0,0,3,0,3,4,0,0,1,0,4,0,3,3,3,1,1,1,0,3,0,3,4,0,4,3,1,3,3,3,1,4,1,1,1,3,3,3,1,3,0,0,4,3,1,2,1,3,0,3,2,1,3,3,2,1,4,1,1,3,3,2,3,1,2,4,2,2,2,1,2,1,4,0,0,0,1,3,3,3,1,2,1,1,2,3,3,3,2,2,4,4,4,1,1,4,3,3,4,0,0,2,2,4,0,4,2,2,2,0,2,2,0,4,2,0,0,0,4,4,2,4,2,2,0,2,2,4,2,0,0,0,4,4,4,0,0,3,3,3,0,1,1,2,4,3,0,2,4,3,4,2,0,2,2,0,3,2,0,2,1,0,2,4,4,2,0,2,4,0,4,3,2,0,4,0,4,2,2,4,4,4,4,4,2,2,2,0,4,2,2,2,0,4,4,2,2,2,4,2,0,2,0,4,4,4,2,0,2,4,0,2,0,2,4,2,4,0,2,2,0,0,4,0,0,2,0,4,0,0,2,2,4,2,0,2,4,2,3,1,4,4,4,4,0,0,0,4,2,0,0,4,0,2,4,0,0,2,0,1,2,4,4,4,0,2,4,4,4,4,2,4,4,4,4,0,0,0,0,2,0,2,0,0,2,4,2,0,4,4,4,4,0,2,4,0,3,4,4,1,0,3,1,0,0,1,4,0,4,1,4,1,4,3,1,3,4,1,0,0,0,3,3,4,3,0,0,1,0,3,4,3,3,4,4,4,3,0,4,4,0,1,1,4,4,1,1,1,1,0,3,0,4,4,1,1,4,4,0,0,0,3,4,4,0,4,4,4,0,1,1,0,4,1,4,3,4,1,0,0,3,0,4,3,0,0,3,2,1,4,0,0,1,3,1,1,2,4,2,4,4,4,4,2,1,0,0,1,4,1,0,2,0,3,1,3,4,1,1,0,2,2,3,3,3,3,1,3,4,1,0,0,3,0,1,3,4,1,3,3,0,1,4,3,3,4,0,1,3,3,3,1,3,1,1,3,3,1,3,3,1,3,1,3,4,3,3,0,3,1,3,0,4,1,0,4,3,3,3,4,4,1,3,1,4,1,0,3,3,3,3,4,3,1,3,3,3,3,1,0,0,3,3,1,3,2,1,1,4,1,1,1,1,3,3,1,4,0,3,3,4,3,1,1,3,1,3,3,0,4,1,0,1,0,3,0,1,3,3,1,4,1,1,3,4,1,1,0,4,3,3,3,4,1,3,4,0,3,3,1,3,4,1,0,1,3,3,3,3,3,1,1,3,3,3,1,0,1,0,3,3,4,3,1,3,4,3,1,3,1,1,3,0,1,3,0,1,1,0,1,4,3,1,0,3,0,0,4,0,3,4,3,0,0,1,3,3,0,3,1,0,4,3,0,3,1,3,3,1,3,1,3,3,3,3,0,3,3,4,1,3,4,0,1,3,1,1,1,1,3,3,1,1,1,0,3,4,3,3,3,3,4,1,4,1,0,1,1,4,1,0,0,1,0,3,3,2,2,3,4,0,0,4,3,2,2,1,3,4,4,3,4,1,2,0,2,2,2,4,0,4,2,2,2,1,0,1,0,0,0,3,2,2,1,1,1,3,0,2,1,3,2,4,4,3,1,4,3,0,1,1,4,1,3,2,3,4,4,1,1,1,3,1,2,1,3,3,2,3,3,1,2,4,3,0,4,1,2,1,4,4,4,1,4,0,4,2,3,0,4,1,0,4,4,0,0,0,1,1,3,0,3,4,1,3,4,0,4,0,1,4,3,2,0,1,0,1,4,0,0,3,3,1,1,1,3,1,2,3,3,4,4,2,3,2,2,2,2,2,4,3,3,3,0,3,0,0,2,4,4,3,3,3,3,0,3,3,2,2,3,1,3,1,1,3,1,4,0,3,0,1,1,3,3,1,2,2,1,3,1,4,3,1,3,4,3,2,1,2,2,3,3,1,2,1,1,4,1,3,1,2,2,1,2,3,2,4,1,3,0,4,2,0,1,4,2,3,0,4,2,1,2,4,0,3,4,2,1,4,0,1,4,3,0,4,1,0,0,0,3,3,0,4,0,1,0,1,0,4,4,4,4,4,4,2,3,2,1,3,1,0,3,2,2,0,4,2,4,1,1,1,4,1,2,2,1,1,3,4,3,4,2,1,4,0,4,4,1,0,1,1,1,0,4,1,3,1,1,1,2,0,3,4,3,0,1,1,4,0,4,4,3,2,3,2,3,0,1,0,3,1,0,3,0,3,0,1,3,4,3,0,1,1,3,3,0,4,4,1,4,3,3,0,4,1,1,1,0,3,1,0,2,3,1,0,0,3,0,4,3,4,4,3,0,1,1,2,4,1,1,2,3,1,1,0,3,1,3,3,2,0,1,0,0,0,1,2,1,2,2,0,2,2,4,2,0,0,0,4,2,2,2,2,2,2,2,4,0,2,1,0,4,4,1,1,3,3,4,4,1,4,4,2,1,2,0,2,2,1,1,2,1,2,2,4,0,3,3,1,0,3,3,1,1,1,4,0,1,4,2,1,3,4,0,4,1,4,4,3,0,1,4,0,0,4,1,4,0,4,1,3,0,0,0,4,1,3,3,0,1,4,0,1,0,3,3,1,4,1,1,4,0,4,4,0,0,1,0,4,4,1,3,1,3,3,0,0,4,4,0,3,1,4,3,1,3,0,2,3,1,3,4,3,1,0,3,1,0,0,1,4,3,3,4,4,4,3,0,0,1,3,3,3,2,3,3,1,1,3,4,3,1,0,4,3,0,2,4,0,0,4,0,4,4,4,3,4,0,4,3,1,3,4,3,4,4,4,4,4,1,4,0,0,0,0,0,0,4,4,4,0,4,4,4,0,4,0,0,0,0,0,0,2,4,4,0,2,4,0,0,4,0,2,2,2,0,2,3,0,4,0,0,0,4,4,1,3,3,2,0,3,1,3,3,4,0,4,4,3,3,1,1,1,3,4,3,0,0,3,2,0,0,3,0,0,4,2,0,2,1,0,0,0,3,0,1,3,4,4,0,4,3,4,0,3,0,0,0,0,0,1,3,0,1,3,0,4,0,4,0,4,2,2,2,0,4,4,2,1,4,4,4,0,4,4,4,0,0,0,0,4,4,4,0,3,1,0,1,0,1,0,0,3,0,4,2,0,2,4,4,0,0,0,0,0,0,2,3,1,3,1,4,0,1,0,1,2,1,3,0,3,0,1,2,1,3,1,3,3,1,2,1,3,0,2,0,3,0,2,4,1,1,2,2,0,0,3,2,0,0,2,4,4,0,1,0,0,3,1,0,3,3,1,2,4,1,1,4,4,3,2,0,0,0,1,0,4,4,0,0,1,4,4,0,1,0,3,0,0,2,4,4,2,4,4,0,3,0,4,1,3,0,0,4,4,1,1,4,3,4,4,1,0,4,1,1,1,4,4,2,2,1,4,1,3,0,0,4,0,2,1,3,4,0,0,4,4,2,3,2,3,0,3,1,1,0,3,3,0,2,2,4,1,3,3,1,0,1,4,3,0,2,4,2,0,0,4,2,0,1,4,4,2,0,2,4,4,4,1,0,4,4,3,2,0,1,0,0,4,3,3,3,4,0,4,4,4,2,2,3,1,4,0,4,0,0,2,4,3,0,4,1,1,4,1,2,0,4,0,0,1,2,2,2,4,4,1,3,0,4,1,1,0,0,4,4,1,4,0,0,4,1,4,0,3,2,3,2,4,2,4,3,1,0,2,3,3,0,0,4,3,3,3,4,3,3,4,1,2,1,0,2,4,2,1,1,4,0,4,3,4,2,1,2,2,2,4,2,1,3,2,1,3,3,4,0,0,0,2,4,2,4,4,2,3,1,1,2,1,0,1,3,0,3,4,3,4,1,2,3,3,0,1,1,3,1,1,3,3,0,2,2,2,3,2,2,0,4,1,0,4,3,0,4,0,2,1,3,0,0,3,3,3,1,1,1,2,1,1,4,0,1,1,1,0,2,3,1,1,3,4,4,4,4,4,3,1,3,2,3,4,1,1,1,1,3,2,2,3,1,3,1,3,1,2,1,4,4,2,2,2,4,3,0,1,2,1,0,2,3,2,2,2,0,3,3,1,1,3,4,3,3,3,1,0,2,1,2,3,3,4,2,4,2,2,0,2,1,1,2,0,3,1,1,0,4,3,2,1,3,4,0,1,1,3,4,2,2,0,1,3,2,0,3,1,1,2,1,1,2,0,1,2,0,0,0,2,3,2,1,3,3,3,2,2,3,2,2,2,3,1,3,1,1,3,3,3,2,3,1,1,1,2,1,3,3,2,3,2,1,0,2,1,2,1,1,2,2,3,2,1,0,2,3,3,3,1,2,1,3,2,4,4,3,4,3,0,3,1,1,3,4,3,2,2,2,4,2,4,2,4,2,2,2,2,2,0,2,0,2,4,2,0,2,2,2,0,4,4,2,2,0,3,0,2,2,4,1,2,1,4,4,3,4,0,4,2,4,1,4,3,1,2,1,2,4,2,1,0,2,2,1,1,3,4,4,2,4,2,0,4,4,1,4,2,1,4,0,2,2,2,2,3,1,3,3,1,4,2,0,1,2,2,4,4,0,4,2,2,4,3,0,4,4,3,4,0,3,1,3,3,4,0,3,0,4,2,1,0,4,1,4,3,2,0,4,1,1,1,1,2,1,1,3,4,3,0,3,1,2,3,4,2,1,4,0,3,0,1,3,4,1,1,4,2,4,3,4,4,0,1,0,4,1,4,4,4,4,0,2,1,0,4,4,4,2,4,0,0,3,4,4,4,0,0,4,1,4,3,1,3,3,1,4,2,3,4,0,3,1,0,3,3,0,3,2,1,3,3,3,2,2,4,1,1,3,1,2,0,2,3,1,3,2,3,3,3,0,3,0,2,2,2,4,3,1,1,3,1,0,1,1,3,2,3,4,0,4,4,3,4,4,1,3,4,0,1,3,0,0,1,3,3,0,3,1,1,1,0,1,0,0,4,0,3,3,0,0,4,4,2,0,2,4,4,4,4,0,4,2,2,0,0,4,2,2,2,4,2,4,2,2,2,0,2,4,2,4,4,2,4,4,0,0,4,2,4,0,4,2,4,2,0,0,0,2,2,2,4,4,2,0,4,2,4,0,2,2,4,2,0,0,0,4,0,0,3,0,1,3,0,3,1,3,3,1,4,1,0,3,3,3,4,0,4,0,3,0,1,4,1,1,3,1,3,0,0,1,0,1,0,4,4,4,0,4,4,0,0,0,4,0,4,4,1,1,1,1,0,0,4,0,0,0,0,0,0,4,4,0,0,0,4,4,4,4,0,4,0,4,3,3,3,1,1,4,2,4,4,0,2,2,2,2,1,2,3,0,2,2,4,0,2,1,2,2,2,0,2,0,2,2,2,2,0,2,2,2,4,2,2,2,2,3,2,1,3,2,0,2,1,3,2,3,1,3,1,3,3,3,3,1,3,3,1,2,2,3,3,1,3,2,3,1,1,1,2,2,3,0,0,1,2,1,1,2,0,1,2,4,4,3,2,4,2,3,3,2,1,2,3,4,0,3,2,3,2,3,2,1,3,1,4,2,0,0,4,4,2,0,4,3,0,4,0,4,2,2,0,2,4,2,2,3,1,0,4,1,4,4,1,1,2,4,3,2,0,2,2,4,0,0,3,1,1,1,3,4,0,1,3,3,4,0,0,1,1,2,1,3,2,4,2,1,4,1,1,1,2,1,3,1,1,2,2,1,3,3,3,2,2,4,1,4,1,1,0,1,3,3,4,3,1,1,1,3,1,3,3,0,3,2,0,1,4,1,0,1,2,1,1,3,1,2,2,3,4,4,4,3,3,1,1,1,4,1,3,4,3,1,3,1,0,3,3,4,2,1,1,3,1,3,1,3,3,2,3,1,1,3,3,2,2,3,1,1,3,1,0,0,4,3,3,1,1,1,4,4,0,0,1,1,3,2,1,4,4,4,0,3,1,2,0,1,1,3,4,4,3,2,4,2,4,1,1,3,2,1,2,2,2,2,3,3,3,2,2,2,4,2,2,2,3,2,2,0,4,0,2,2,3,2,3,0,2,2,2,0,0,2,3,4,3,4,3,2,1,1,0,1,0,2,2,2,1,2,1,4,1,1,3,1,1,3,3,4,1,0,1,3,1,3,1,3,1,1,3,0,0,3,3,0,1,1,3,1,3,3,1,3,3,0,3,1,4,3,4,1,1,3,1,4,3,4,3,1,3,1,1,3,3,3,3,1,3,1,1,3,1,1,2,1,3,4,3,3,1,1,3,3,3,1,1,3,1,3,3,1,3,1,1,3,3,0,1,0,1,1,3,1,1,1,3,3,1,0,1,1,1,1,1,3,3,4,3,3,3,3,1,1,3,1,3,1,1,3,1,3,3,1,3,3,1,3,1,3,3,3,3,1,3,3,1,1,1,1,3,0,1,3,1,1,3,1,3,1,1,3,1,1,3,3,1,3,3,3,3,1,1,1,1,4,1,1,3,3,0,0,0,0,1,0,0,1,3,1,3,3,4,3,1,3,0,3,4,1,4,0,0,4,3,4,0,3,0,3,0,4,1,3,3,3,1,3,0,0,0,2,0,1,4,3,2,1,3,2,2,4,0,1,2,4,2,3,1,2,1,3,1,3,0,4,4,0,4,2,3,0,4,2,0,2,2,0,4,2,2,2,2,2,1,1,1,1,0,0,2,1,1,2,0,2,0,2,2,4,2,2,4,1,2,0,4,1,2,4,1,2,3,3,4,1,0,4,3,4,0,3,0,0,0,1,1,4,0,1,2,0,1,2,4,4,0,4,0,0,4,0,3,4,4,0,1,1,3,2,1,0,0,3,2,0,3,1,3,3,3,4,4,0,4,4,3,2,0,2,4,2,3,0,4,1,0,1,1,0,0,2,1,1,0,3,4,1,0,3,1,2,3,2,4,3,4,4,1,3,1,3,1,4,1,0,0,2,3,3,1,1,3,1,3,1,1,1,4,1,1,2,2,3,3,0,0,1,2,4,4,2,4,3,2,1,2,2,1,2,2,3,2,2,2,2,3,3,2,3,1,1,0,3,0,3,3,3,3,2,3,4,1,4,0,2,3,3,0,0,4,3,1,0,3,2,4,1,1,2,0,0,4,3,1,1,0,2,4,4,2,3,2,0,1,4,1,1,1,2,1,3,3,2,1,0,2,4,4,2,4,2,2,3,3,2,1,4,4,4,4,2,2,0,0,1,1,4,4,0,3,4,4,1,3,0,4,0,1,4,3,4,0,4,0,4,3,1,3,0,0,1,0,0,4,4,0,3,0,0,0,3,1,3,0,2,3,0,2,3,3,0,0,4,2,3,4,1,2,2,2,4,2,1,0,2,2,4,0,0,2,1,0,1,3,2,0,2,2,3,3,2,3,0,2,3,4,4,1,3,3,4,1,4,1,1,3,0,1,0,3,0,1,3,0,0,2,1,0,2,3,2,2,1,1,4,2,1,1,1,1,1,1,3,0,4,1,0,2,1,4,2,1,2,0,2,2,0,2,2,4,4,2,2,0,2,2,3,3,3,1,0,4,4,0,1,0,3,4,0,1,3,2,2,1,1,2,3,2,2,3,2,3,1,3,0,2,2,1,1,1,1,0,3,0,0,3,0,2,2,4,1,3,3,4,4,3,1,3,1,1,0,1,0,0,4,1,3,2,2,2,3,1,0,2,1,3,1,3,3,0,4,0,0,0,0,1,4,1,1,2,0,0,0,2,4,0,2,4,0,2,0,2,4,4,0,0,0,4,0,0,2,4,1,4,3,1,4,3,2,4,0,0,3,3,1,3,1,1,1,0,0,1,0,3,3,1,0,2,4,4,2,1,0,3,2,3,2,0,4,3,3,0,3,1,1,1,1,0,2,3,1,3,2,1,3,2,2,4,2,2,2,2,2,4,1,1,4,3,0,3,3,4,2,2,2,1,3,3,4,0,0,1,2,4,2,3,1,4,3,2,3,4,0,4,3,0,3,4,0,4,4,2,4,3,4,0,1,3,3,3,1,4,0,3,3,3,3,3,3,1,1,1,0,4,4,3,1,2,1,3,4,3,4,1,3,4,0,2,3,1,1,1,3,1,4,0,0,4,4,4,3,0,2,3,3,3,4,1,4,3,1,0,4,3,1,1,4,3,4,1,3,4,1,4,4,3,0,4,2,2,4,0,4,0,0,1,3,1,4,1,4,3,1,3,3,0,0,0,4,1,3,1,4,4,0,0,3,3,4,2,0,1,0,0,0,1,0,4,0,4,4,3,4,4,1,4,0,4,0,1,1,1,0,3,4,4,3,4,3,0,0,3,1,3,1,1,4,1,3,0,2,0,4,3,3,3,3,4,1,0,4,4,0,1,3,1,1,1,2,3,3,4,3,4,0,1,4,4,4,1,2,2,2,2,3,2,1,1,4,4,2,2,2,1,3,1,3,1,3,1,4,1,2,3,1,1,0,3,1,1,3,4,0,1,2,3,4,2,2,1,3,0,0,4,1,3,4,3,4,2,2,4,2,1,1,2,2,4,0,3,4,3,1,2,0,1,2,4,1,3,2,0,2,2,3,2,1,3,1,1,3,3,0,3,0,4,3,3,3,1,0,2,3,0,0,4,4,3,2,3,4,2,2,4,3,1,3,0,1,3,3,0,3,3,0,4,0,1,1,1,0,1,4,1,1,4,0,2,1,3,2,0,3,3,1,1,4,1,2,0,0,0,0,0,3,0,3,3,0,1,3,1,1,1,3,4,1,4,3,2,4,2,0,1,1,2,1,3,3,1,4,4,4,0,3,2,2,4,4,3,0,3,3,4,1,0,3,1,1,1,2,1,4,1,0,1,0,3,0,3,4,1,2,1,1,4,3,1,0,3,1,3,0,0,4,3,0,1,1,1,1,4,1,4,3,4,0,4,3,2,0,3,3,1,0,0,1,1,3,1,2,2,4,1,1,1,4,4,1,1,0,0,1,3,2,1,0,3,3,1,1,2,0,2,0,1,2,4,1,3,3,1,3,4,0,1,1,1,3,2,3,1,1,1,1,4,1,2,1,3,0,4,3,1,2,4,4,3,1,4,2,3,3,3,4,3,2,2,1,1,3,2,0,2,4,0,2,3,3,3,3,2,1,1,3,2,2,0,1,2,4,4,3,1,1,4,4,1,3,3,2,0,0,4,0,4,4,4,0,4,4,0,0,4,0,0,4,0,0,4,0,0,4,4,0,4,4,4,4,4,0,0,4,0,0,4,4,4,0,4,4,0,0,4,3,2,2,1,4,2,3,2,3,2,3,2,2,2,4,4,2,4,2,2,1,1,2,0,2,0,4,0,3,0,2,2,4,3,3,4,2,3,2,4,1,0,1,3,1,1,1,3,0,0,1,2,1,4,3,1,3,1,2,3,1,1,2,0,2,3,1,1,4,1,0,4,4,0,0,0,2,0,4,4,4,4,2,2,4,4,0,3,0,3,1,1,1,4,2,2,2,2,2,0,0,4,3,2,2,2,2,2,2,2,2,2,2,2,2,2,2,2,0,0,4,1,1,1,1,1,3,1,3,3,3,1,1,3,1,1,3,3,3,1,2,2,2,2,2,2,2,2,2,1,4,0,1,1,3,3,3,2,2,3,2,1,0,4,4,4,1,3,3,3,3,1,4,3,4,1,3,0,1,1,3,3,1,1,2,2,1,3,2,1,1,1,3,3,3,1,1,2,2,3,1,1,1,2,2,3,1,3,4,4,0,0,0,4,3,3,4,4,1,0,4,0,0,4,0,4,0,4,1,3,1,3,3,1,1,2,3,2,2,1,0,1,3,1,4,3,1,3,2,0,4,1,2,4,3,3,1,4,1,3,0,0,3,3,2,3,2,3,1,1,1,0,1,4,3,1,4,0,3,4,4,0,3,0,3,0,1,0,0,4,4,1,1,0,4,4,0,0,3,4,1,4,4,1,0,3,3,3,4,1,0,1,0,0,1,3,0,4,0,0,4,4,1,4,0,0,4,0,0,0,3,0,3,0,0,4,0,4,4,4,4,4,4,4,0,0,0,4,0,4,0,0,0,0,4,0,0,0,0,4,0,0,0,4,0,0,4,4,4,4,4,4,0,4,4,4,0,0,4,4,0,0,4,0,4,0,4,4,0,1,2,2,1,3,1,1,3,1,1,1,3,1,3,1,1,1,3,3,4,1,1,1,3,3,1,3,3,3,3,3,4,3,3,1,3,2,2,2,1,3,4,3,3,1,3,3,2,3,3,2,2,1,1,1,1,3,1,1,3,1,3,1,3,2,2,2,3,1,1,1,3,1,3,0,4,1,3,1,3,1,1,4,1,3,3,1,1,2,1,1,0,1,2,2,3,3,2,1,3,2,3,3,1,4,3,2,2,3,3,3,1,1,1,4,1,1,2,3,3,2,1,1,3,0,0,2,3,0,2,4,1,3,2,1,0,0,1,4,1,1,4,3,3,1,2,1,3,1,0,2,2,3,1,2,2,1,1,3,2,3,1,2,3,3,0,3,4,2,2,2,2,1,3,2,1,1,4,0,2,0,2,2,2,3,0,1,0,4,2,3,1,2,1,1,2,2,0,0,2,4,0,4,0,0,4,0,4,0,2,2,0,2,0,2,4,2,2,2,2,4,4,2,0,3,1,1,4,2,1,2,1,3,0,3,1,0,3,0,2,2,4,0,2,4,3,4,2,2,1,2,2,3,3,2,0,2,1,2,1,0,3,2,4,2,3,4,1,2,0,0,3,1,4,0,1,3,3,4,4,0,1,0,2,1,4,4,0,4,3,4,4,4,4,0,2,0,2,0,4,3,1,1,1,4,4,2,1,2,2,0,0,1,3,3,0,0,2,2,4,4,3,1,1,0,4,1,1,2,4,4,0,4,4,4,1,0,0,0,0,2,4,1,0,4,0,2,4,3,4,0,1,0,0,2,0,4,0,4,4,4,2,4,2,0,2,3,2,2,0,3,3,0,0,2,2,1,0,0,4,0,3,4,3,0,3,4,0,0,3,4,0,0,0,1,2,0,0,2,4,1,3,4,0,3,2,4,1,1,4,3,2,1,4,1,1,1,3,4,4,0,1,4,0,4,4,4,1,2,0,2,4,1,4,4,4,4,0,4,1,0,3,3,1,0,3,0,0,4,4,3,3,0,1,0,0,3,4,1,3,0,4,2,0,1,0,3,0,0,1,0,0,4,4,4,0,0,2,4,4,1,2,3,4,2,2,3,0,4,2,3,1,1,4,1,2,4,2,0,4,4,4,0,1,4,2,4,4,3,0,3,0,4,4,0,4,1,2,0,4,1,0,3,1,3,3,4,0,0,0,4,4,0,4,2,0,2,2,0,2,1,2,2,0,0,4,2,2,3,4,0,0,0,4,0,0,2,3,2,2,4,4,4,2,0,2,1,4,0,4,4,4,4,4,4,0,0,0,0,4,0,1,0,0,0,4,0,4,0,4,0,2,1,2,4,3,4,0,2,3,4,4,0,4,2,4,0,4,0,4,0,0,0,0,4,0,4,4,4,4,0,3,0,3,4,1,1,4,0,3,1,0,0,0,4,0,2,0,0,1,1,4,0,4,2,0,0,0,3,0,4,3,4,3,1,4,0,0,4,2,0,2,1,4,0,0,4,2,3,3,0,0,1,4,2,3,4,3,1,1,3,3,2,0,3,4,0,1,0,4,1,4,3,0,1,3,1,1,3,1,4,4,1,1,4,0,3,4,1,4,1,1,0,0,0,1,0,0,1,4,4,0,4,3,1,0,0,0,0,0,2,1,0,3,0,3,0,1,4,3,0,1,0,4,2,4,0,2,2,2,1,3,4,3,2,0,1,2,0,3,0,4,1,4,4,2,1,3,4,1,1,4,1,4,1,3,4,0,2,3,1,4,3,4,4,0,4,0,0,3,3,1,4,4,0,4,3,1,3,1,1,3,2,0,2,2,4,3,1,4,1,3,2,3,2,4,1,0,4,2,3,2,3,3,0,2,2,4,3,2,3,0,0,0,1,3,3,1,4,3,4,0,1,0,3,4,1,3,1,2,3,3,3,1,1,1,3,1,3,1,4,3,3,3,1,3,4,4,1,3,3,1,4,3,4,1,4,0,2,3,1,3,2,1,4,1,3,1,0,3,0,3,3,4,3,3,0,2,2,1,4,1,3,4,4,0,3,1,3,1,1,2,2,2,2,0,0,3,4,4,0,4,0,4,1,4,1,3,2,0,2,2,0,4,4,0,4,0,2,3,1,1,0,3,1,4,4,1,1,0,0,4,3,3,4,0,4,4,4,2,2,3,1,4,0,3,4,4,1,3,0,2,4,4,3,4,2,2,1,3,1,0,4,1,2,3,4,4,0,2,0,1,2,2,0,2,4,4,0,2,4,0,0,2,2,4,4,2,2,4,2,1,3,2,4,3,3,2,3,1,2,2,3,3,1,2,0,4,1,3,4,4,1,4,1,1,1,4,0,0,3,3,4,1,0,1,4,4,4,1,3,0,4,0,1,3,0,1,4,4,0,2,1,0,2,2,1,1,2,2,1,4,3,3,4,1,3,0,3,2,0,0,0,0,3,4,2,0,3,3,0,0,3,3,1,0,3,1,1,4,1,1,1,1,1,0,3,4,0,2,0,3,4,0,4,4,0,4,1,4,0,3,3,1,1,1,4,4,4,2,3,0,1,4,4,3,4,4,4,0,3,4,4,4,4,1,4,2,4,2,2,0,1,0,3,3,2,0,4,4,1,4,0,0,4,1,2,2,2,1,3,1,3,2,2,3,1,2,2,3,1,4,2,1,3,4,4,4,0,4,2,0,0,3,4,0,3,3,4,3,0,2,0,4,3,0,0,2,2,1,0,0,2,1,3,3,4,1,0,0,0,4,3,3,3,1,3,0,3,1,0,4,4,1,1,3,3,2,0,1,1,3,3,1,0,4,1,1,0,2,0,2,3,3,4,4,3,0,4,0,1,0,0,3,1,3,3,4,3,1,2,1,4,1,3,3,3,3,2,2,3,0,2,3,4,3,2,2,2,3,1,3,1,3,1,1,2,4,4,4,4,0,0,1,4,1,1,4,2,1,2,2,3,0,1,2,2,1,1,2,0,2,2,2,2,4,2,2,4,2,2,4,1,1,3,3,0,3,2,4,2,1,1,1,1,2,2,1,3,1,3,4,2,2,1,4,3,2,4,3,1,3,4,2,1,4,2,2,2,2,2,2,2,2,2,2,1,3,2,2,4,2,3,1,3,1,3,1,1,2,0,2,3,3,2,1,2,0,0,2,4,1,3,1,2,3,1,2,4,2,2,2,3,2,3,3,2,2,4,2,2,0,2,1,1,3,3,4,2,3,3,2,2,0,0,2,2,2,1,1,3,3,0,4,2,3,2,0,3,3,3,2,4,4,2,2,3,2,3,0,1,1,1,3,3,3,3,1,0,0,1,1,0,1,3,3,4,1,3,3,1,1,1,1,3,1,3,3,1,3,3,3,3,2,3,1,3,0,3,2,4,3,0,0,4,0,0,0,0,0,1,3,3,4,3,0,3,4,4,1,1,3,1,4,1,4,2,2,0,2,0,2,2,3,1,1,2,0,4,3,0,1,3,1,1,1,3,1,4,2,0,4,0,2,1,3,2,3,3,2,2,1,1,2,1,0,0,0,4,4,1,1,0,1,1,3,0,4,3,1,3,1,4,4,1,3,0,3,2,2,1,4,1,1,1,4,1,4,2,3,4,0,0,4,3,1,3,4,3,0,3,0,2,1,0,4,2,2,2,3,3,0,2,0,3,1,2,1,1,3,4,0,0,0,4,4,2,4,0,2,0,4,4,1,3,4,4,4,4,3,0,2,0,4,0,2,4,0,4,3,0,4,2,2,1,0,4,0,0,0,2,1,0,4,4,2,1,4,4,3,0,4,2,2,4,0,4,4,4,3,2,0,4,0,2,0,1,1,4,1,0,2,4,3,2,1,1,3,3,4,1,2,0,0,0,4
B126,1,0,0,3,3,0,3,3,4,3,3,3,3,1,0,3,1,0,1,4,4,1,1,1,0,3,1,2,4,4,0,0,4,4,4,0,4,0,4,0,0,4,0,1,1,1,3,0,3,4,1,1,1,3,3,3,2,0,0,4,4,1,2,1,4,0,0,1,1,3,3,4,4,0,1,1,1,3,0,0,3,1,3,2,1,1,1,3,4,3,1,3,1,4,3,4,1,1,3,4,3,0,4,3,3,1,0,1,1,3,3,4,0,3,4,0,1,1,0,0,3,0,3,3,4,0,3,2,4,4,0,3,4,0,4,0,0,3,4,0,4,0,3,1,1,0,1,1,0,0,4,0,3,1,4,1,0,0,0,3,4,3,1,3,0,4,4,0,4,1,1,1,4,4,2,4,4,4,0,2,2,2,1,4,0,4,2,1,1,1,4,0,0,4,4,0,0,2,2,1,0,4,2,0,1,1,4,2,3,2,1,0,2,4,2,2,2,3,0,2,2,1,4,1,3,1,1,0,0,0,4,1,1,4,1,4,2,4,4,4,4,3,1,3,1,0,3,2,3,1,1,1,3,2,4,2,1,2,2,2,2,2,2,2,2,0,3,3,3,1,3,3,4,2,3,4,3,3,1,0,3,1,1,4,3,3,4,1,3,2,0,1,3,3,1,1,3,1,3,1,1,1,1,0,1,1,3,3,3,3,3,1,3,4,2,2,2,1,1,2,3,4,0,1,3,1,3,0,4,3,1,1,3,3,3,1,3,2,3,3,1,3,3,3,2,3,1,3,4,1,4,3,1,3,2,1,1,3,1,2,1,3,3,3,0,4,2,2,0,3,4,1,0,2,3,2,1,2,1,3,3,0,1,4,3,4,3,1,1,0,1,4,3,1,1,1,0,4,0,3,1,4,0,1,1,1,0,0,2,3,1,1,1,0,1,1,3,3,4,1,1,3,1,1,3,1,2,2,0,0,0,1,2,4,3,4,4,4,1,2,4,1,1,2,2,3,0,3,1,0,1,2,2,4,2,3,0,0,4,0,4,4,2,2,2,2,2,4,0,4,2,2,2,3,3,1,1,1,0,3,1,1,1,1,0,1,0,1,1,0,1,2,0,3,2,3,1,0,2,1,0,1,1,1,4,2,3,1,4,1,3,3,2,2,1,4,0,3,2,3,1,2,3,2,2,2,2,2,1,2,1,1,3,2,4,2,4,2,2,4,3,3,2,0,2,0,2,2,4,2,2,0,4,2,2,0,3,3,3,4,4,1,3,1,1,3,2,1,4,1,2,1,3,1,4,0,0,1,3,2,2,0,3,2,4,2,2,2,2,2,1,0,2,1,3,0,2,2,2,1,1,0,3,3,1,4,1,1,0,4,2,2,1,1,2,2,2,2,2,2,2,0,0,4,2,0,2,1,2,0,3,3,1,4,1,2,0,1,1,2,1,1,2,4,1,1,0,3,4,2,3,1,3,4,1,1,1,1,3,2,1,3,4,1,3,3,3,4,2,1,3,3,2,1,4,0,1,2,1,2,1,4,3,3,0,3,0,4,4,4,0,4,0,0,0,0,4,0,1,2,2,0,1,1,2,4,3,3,1,3,1,3,3,1,3,2,0,2,0,2,0,2,4,3,4,3,4,1,3,3,1,3,1,3,1,1,0,1,1,3,3,3,4,1,3,4,3,4,0,1,4,4,4,4,2,0,3,4,0,4,0,0,3,3,2,3,1,1,1,1,0,4,4,3,3,1,3,0,4,3,0,1,4,4,4,3,0,1,3,3,2,0,4,3,1,0,3,0,1,3,1,3,1,3,1,1,2,1,2,0,4,3,4,1,3,2,2,1,4,0,3,1,3,2,2,2,2,2,2,2,0,2,0,3,0,0,3,1,3,4,4,4,1,2,0,4,1,3,1,2,0,3,3,4,1,1,2,0,0,2,3,3,1,0,2,3,1,1,2,4,0,3,3,3,1,4,2,3,1,4,0,0,1,3,0,1,1,0,3,3,4,3,1,2,0,4,4,3,0,0,1,1,3,1,3,2,3,3,4,1,2,1,4,1,0,2,2,1,3,4,1,3,3,4,0,3,3,2,4,3,0,1,2,2,2,3,1,3,1,4,2,0,2,2,1,4,4,3,3,2,0,3,2,1,1,3,3,3,1,0,4,1,3,4,4,3,3,0,1,4,1,4,1,1,1,4,2,2,3,1,3,0,3,4,3,1,1,0,3,1,3,3,1,1,1,1,4,3,3,2,3,4,0,3,0,0,0,1,4,1,1,0,0,1,1,1,1,0,1,2,1,1,1,3,3,1,1,1,3,1,3,3,1,0,0,0,0,4,4,3,2,4,0,1,3,1,1,1,1,4,1,3,4,2,3,3,3,4,2,3,3,3,1,1,1,3,3,1,0,3,0,1,3,2,2,4,1,1,4,1,2,0,1,4,1,3,2,4,3,2,3,2,1,1,3,3,1,3,4,1,1,3,3,1,3,1,2,0,3,4,1,2,1,2,3,1,2,3,3,1,4,3,1,3,1,1,1,3,4,3,2,0,2,3,3,2,3,1,3,4,3,0,1,1,0,0,3,4,2,1,0,3,3,3,1,4,0,2,3,0,4,0,3,1,3,4,1,3,4,3,1,4,1,3,1,0,3,1,0,3,3,0,1,0,1,4,4,4,3,3,3,0,0,4,4,0,0,1,0,1,2,3,1,1,4,3,0,0,0,2,4,1,3,4,1,3,1,1,4,4,0,1,4,0,4,3,2,2,2,0,4,0,2,3,2,2,0,2,1,4,0,2,0,3,0,0,3,2,3,3,0,3,1,1,3,0,3,3,1,4,2,1,2,1,1,1,0,0,0,0,1,3,1,3,3,0,4,3,0,3,1,1,3,1,1,3,0,1,0,4,2,4,0,3,2,3,3,1,4,0,1,1,1,0,3,3,3,4,3,1,1,0,2,0,3,4,0,3,0,1,0,3,3,1,0,3,0,4,4,1,4,1,0,4,4,0,2,2,1,4,0,2,2,1,2,3,3,2,1,3,3,3,1,1,4,3,4,1,1,2,0,4,0,4,4,1,4,2,0,3,4,3,1,4,4,4,3,0,3,3,3,1,3,3,4,2,0,3,1,3,3,4,0,4,4,0,1,4,4,3,1,3,2,1,4,0,1,0,4,4,0,3,3,3,1,0,4,1,3,0,0,2,1,3,1,1,2,1,0,1,2,2,3,4,3,2,2,3,4,4,3,0,2,2,2,0,4,0,3,2,3,1,1,3,1,1,3,1,3,3,1,3,3,1,3,1,3,1,1,1,0,2,2,3,3,0,1,3,4,0,2,4,0,1,2,2,2,3,3,4,3,4,2,1,1,3,1,1,4,1,2,4,1,2,0,0,0,1,2,3,2,2,3,2,1,1,1,2,0,2,2,3,4,2,3,1,3,1,4,0,2,1,1,0,2,0,4,2,3,2,1,2,2,2,2,2,2,4,4,1,3,0,0,0,4,0,1,1,4,4,0,0,2,0,0,3,4,4,4,3,4,3,4,0,1,0,3,3,0,0,4,0,4,0,1,0,1,1,4,1,1,4,3,3,0,1,2,4,3,3,2,1,4,3,3,3,2,2,4,4,2,4,3,1,1,1,2,1,4,3,1,2,3,0,4,3,3,0,0,1,4,0,4,0,0,2,3,0,0,1,3,3,1,3,3,1,2,4,1,1,1,1,1,1,1,4,0,3,0,4,3,2,2,2,2,4,2,0,3,3,2,4,0,1,0,3,0,4,4,4,2,3,4,1,2,3,0,0,4,1,0,3,0,4,4,0,0,0,0,1,1,1,1,4,0,4,2,1,4,1,1,3,4,4,1,4,1,4,4,3,0,2,3,4,0,1,4,1,1,2,3,3,3,0,2,2,3,2,3,1,1,2,0,3,3,3,3,1,0,4,0,4,2,1,4,4,1,3,4,3,0,3,3,3,2,0,3,3,3,4,4,1,1,3,3,2,1,2,1,3,0,0,0,0,4,1,1,0,0,0,0,3,4,4,3,4,4,0,0,3,0,3,3,2,4,1,1,2,3,1,3,2,4,3,1,3,3,4,2,3,2,3,3,3,3,1,2,3,0,0,4,0,4,1,3,1,2,0,1,1,1,3,2,0,2,4,1,2,2,3,4,2,3,2,2,4,0,2,2,2,2,2,4,0,2,0,4,2,4,2,0,2,0,4,2,0,4,2,2,4,2,0,4,4,4,4,0,3,1,1,3,2,3,1,3,1,1,0,1,2,3,1,1,1,2,2,3,3,2,1,3,2,1,4,1,1,3,1,3,2,2,3,1,1,3,1,3,1,1,3,1,2,4,1,4,2,4,1,1,1,4,3,1,3,1,1,3,1,3,1,0,1,0,3,3,3,4,4,3,3,3,0,4,3,0,0,1,1,4,1,0,3,3,3,1,3,0,0,4,1,0,3,0,1,1,1,1,4,0,1,0,1,3,3,3,1,0,0,0,0,3,0,0,0,0,1,4,3,4,2,4,0,1,4,4,4,4,0,0,4,4,0,4,4,1,3,1,4,3,4,1,4,1,1,0,1,3,1,0,1,4,3,3,1,1,3,1,1,4,3,0,0,3,0,1,3,2,1,3,4,0,1,0,0,1,3,2,3,2,2,2,2,2,2,2,1,3,2,2,2,2,2,2,2,2,1,0,3,2,2,2,2,4,2,2,1,3,2,2,2,0,2,2,3,3,3,1,2,0,1,0,2,0,4,4,2,1,0,0,4,4,3,4,3,4,3,4,4,4,2,4,0,0,1,3,4,3,2,4,3,4,1,1,0,1,4,1,0,3,3,3,3,0,2,0,0,4,2,4,0,2,3,0,1,0,3,1,0,4,2,3,3,0,0,2,1,0,0,4,4,4,0,3,3,3,3,4,0,4,0,0,0,4,2,0,1,4,3,1,1,2,3,4,2,2,3,2,1,3,1,4,0,2,4,3,0,0,1,0,4,2,4,0,4,4,4,4,4,0,2,0,2,2,4,4,0,2,2,0,2,2,4,0,0,0,0,0,4,4,0,4,2,2,4,2,4,4,2,4,0,0,4,2,2,2,2,4,2,2,2,2,2,0,2,4,0,2,2,2,2,0,2,2,1,2,2,0,0,4,2,2,2,2,4,0,4,4,2,2,0,0,4,2,2,2,2,2,2,2,2,2,4,0,4,2,0,0,2,0,0,2,2,2,2,0,0,0,0,0,0,4,4,4,0,2,4,2,2,4,4,2,4,4,0,4,2,2,2,2,4,2,4,2,2,4,2,2,2,4,4,4,0,4,4,4,4,0,4,4,0,3,3,1,3,1,1,4,1,1,0,1,0,0,0,0,1,1,1,1,1,4,4,1,1,3,1,1,3,0,1,3,1,1,3,1,0,0,4,3,3,1,4,1,1,4,3,3,3,4,4,3,4,1,3,4,0,3,1,3,3,3,3,1,1,4,0,4,4,1,1,0,4,3,0,4,0,0,1,4,1,3,3,4,3,3,1,0,4,4,0,3,0,4,1,0,4,3,4,3,4,4,3,1,0,0,2,1,3,0,3,0,2,1,3,4,4,0,1,3,3,4,1,4,4,3,3,3,1,0,1,3,4,3,0,1,4,1,3,3,1,3,1,3,4,2,2,0,0,2,2,0,2,1,3,2,1,2,3,0,1,1,2,2,1,2,2,4,4,0,4,4,1,1,2,2,1,2,4,1,4,0,0,4,0,0,3,1,0,1,3,1,0,3,1,2,2,2,2,0,4,4,2,2,2,2,2,2,4,0,0,2,2,2,4,4,2,2,2,2,2,2,2,2,0,2,2,2,2,2,4,2,4,2,0,0,2,2,2,2,2,2,2,2,2,4,2,2,2,2,2,2,2,2,2,2,2,2,0,2,2,2,2,2,2,4,2,3,2,2,0,2,2,2,2,2,2,2,2,2,2,2,2,2,2,2,2,2,2,2,2,2,2,2,2,2,2,1,2,2,2,2,2,2,2,2,4,0,0,4,2,2,4,2,2,3,3,2,3,1,2,3,3,3,2,3,1,3,2,4,2,0,4,2,2,2,2,2,2,3,4,0,0,2,0,1,1,3,0,2,1,2,3,2,2,0,4,2,2,2,1,1,3,1,0,3,3,3,2,2,3,1,2,3,3,1,0,2,3,2,3,3,2,2,3,2,3,1,2,1,2,1,2,1,2,2,2,2,2,2,2,3,2,4,3,3,1,2,2,0,1,3,2,2,4,2,0,2,3,2,3,4,3,1,2,2,4,2,2,0,3,2,3,3,3,2,4,0,3,2,3,2,1,0,3,3,4,2,2,4,3,3,3,2,1,3,4,4,1,3,3,2,3,2,1,2,2,2,0,0,3,3,1,2,3,0,3,0,2,2,3,2,2,2,3,1,1,3,1,3,1,1,3,1,3,1,3,4,2,2,2,3,2,0,3,2,1,0,3,1,2,2,2,0,3,2,0,2,1,4,3,0,2,3,2,2,3,2,2,0,3,3,0,0,3,4,4,3,0,1,0,1,3,1,1,4,0,4,1,3,2,3,2,0,0,3,0,3,4,3,3,0,2,3,3,2,3,4,1,2,2,3,1,0,2,2,0,2,3,1,3,3,1,3,1,3,4,3,3,3,3,1,3,4,4,4,2,1,1,1,1,0,0,1,1,2,1,0,4,1,2,2,1,3,3,4,2,3,4,1,3,4,1,2,3,3,2,0,2,3,2,1,3,1,2,1,3,2,1,1,2,4,4,2,3,3,1,3,3,1,1,3,2,1,1,4,1,3,3,4,0,2,1,3,1,0,4,3,3,3,1,1,1,3,4,0,3,1,1,2,2,4,2,1,2,0,4,2,2,1,1,2,2,2,4,0,1,2,3,3,2,2,2,0,1,2,0,0,2,2,0,0,1,3,1,2,3,3,3,2,0,1,1,0,0,2,3,3,3,0,1,2,1,3,3,4,4,2,2,3,2,1,4,1,4,1,1,2,1,0,3,1,3,3,3,0,3,4,3,1,2,0,1,1,1,3,3,3,1,2,1,1,1,4,2,3,1,2,3,1,1,2,1,2,3,2,0,2,1,3,1,4,2,2,2,1,2,2,2,4,1,2,3,4,2,2,3,4,2,2,2,2,3,2,2,2,2,2,4,2,2,4,2,2,1,1,1,2,2,3,3,2,2,4,3,3,3,3,2,1,0,1,1,1,3,1,1,0,1,0,2,2,2,4,0,4,0,3,2,3,3,1,3,1,3,3,3,2,2,0,4,3,0,0,0,2,4,4,3,0,3,1,4,2,2,3,3,1,1,1,3,3,1,3,1,0,0,2,3,1,1,3,1,1,3,1,2,1,1,2,4,1,1,1,0,4,2,3,3,0,0,0,4,0,2,2,2,2,2,2,2,2,0,4,2,1,0,3,1,3,0,2,3,1,3,1,1,1,3,3,3,3,3,3,2,1,3,1,3,1,1,1,3,1,2,0,4,4,0,4,4,0,4,1,2,2,0,2,2,2,2,2,2,2,2,2,2,3,1,3,2,2,1,3,1,2,1,4,3,4,1,0,0,0,4,4,0,0,0,2,1,3,1,4,0,3,4,3,0,1,4,3,4,3,1,2,0,1,3,0,0,0,4,4,4,1,2,3,3,2,0,1,3,3,3,3,4,4,4,4,4,3,0,3,4,4,2,1,4,3,0,1,0,2,1,2,3,1,0,3,2,4,3,1,4,3,2,1,1,1,0,2,2,0,1,1,2,1,0,4,0,0,3,2,4,2,4,1,3,1,2,0,2,4,0,3,4,4,4,4,4,0,1,4,2,4,3,2,0,2,2,2,2,2,0,0,4,2,0,4,2,2,2,4,4,4,2,4,3,1,3,4,1,3,1,4,0,0,3,1,0,4,1,1,2,4,1,1,0,0,0,3,4,4,1,3,2,0,4,1,3,1,2,3,0,2,1,0,1,0,0,2,1,0,0,0,1,1,0,4,1,0,1,3,1,2,3,3,3,3,2,4,3,4,4,0,0,4,4,0,4,4,0,1,4,0,3,3,0,3,2,3,1,1,1,1,1,4,1,3,0,3,1,3,3,4,3,3,1,0,2,4,0,1,0,3,1,3,3,3,2,2,2,2,3,0,0,2,2,1,1,2,2,1,1,3,3,2,1,1,1,4,3,3,1,1,1,2,1,4,3,4,0,1,1,0,1,3,1,1,3,2,1,1,1,3,3,1,1,4,2,1,2,2,2,2,1,3,4,3,4,4,3,3,1,4,0,1,1,1,4,0,1,4,2,0,4,4,3,0,0,1,1,3,1,1,1,4,1,0,3,0,3,3,3,1,1,0,1,3,3,1,3,1,1,2,1,3,3,1,3,2,3,1,1,2,1,3,1,1,2,2,2,2,0,1,3,3,3,4,4,3,1,0,1,1,4,4,3,1,1,3,3,3,3,1,3,1,2,2,0,2,2,2,4,2,2,3,3,2,1,1,3,3,1,1,1,1,3,0,2,1,2,2,2,2,2,2,2,1,3,1,1,3,1,2,3,1,1,2,2,1,1,3,2,2,2,2,2,0,2,2,4,1,1,2,3,1,3,4,0,4,0,4,0,4,2,4,2,2,4,4,4,0,0,4,1,3,2,3,2,4,2,0,4,4,3,2,1,1,1,1,1,3,0,3,3,0,4,0,2,4,0,2,0,0,2,2,0,0,1,3,0,3,0,0,4,3,4,0,1,2,0,4,0,0,4,1,1,1,1,3,1,1,3,1,1,3,0,1,2,1,2,2,2,1,3,3,0,1,1,1,1,1,2,1,2,1,2,2,3,2,1,3,2,2,3,2,1,3,2,2,2,3,1,2,4,2,2,4,2,2,4,3,0,2,1,4,3,1,2,1,3,4,1,3,1,2,2,2,2,2,2,2,0,2,0,0,2,2,2,2,2,0,4,2,2,2,2,2,0,2,2,4,2,0,2,4,4,0,2,4,2,2,0,0,2,2,2,4,2,2,2,2,2,2,2,2,4,4,0,4,0,0,4,0,1,1,0,1,4,0,0,0,2,0,3,1,2,1,4,1,2,0,1,3,2,2,2,2,1,2,2,1,2,4,3,2,3,2,1,0,4,2,3,0,3,3,2,1,0,3,3,3,1,0,1,1,0,2,2,3,2,2,1,1,2,1,3,0,1,4,2,3,1,2,0,2,4,2,1,4,4,0,2,4,2,3,3,3,1,2,3,0,1,3,3,4,0,0,4,3,0,1,4,3,1,2,3,2,2,1,2,3,2,1,1,1,3,1,3,3,1,1,1,3,3,3,0,1,0,3,2,2,2,3,2,3,3,3,3,2,2,2,3,2,3,3,1,3,1,3,3,3,1,3,1,1,1,3,1,3,3,3,4,3,0,1,1,3,1,3,1,1,3,3,2,1,2,3,4,1,1,3,1,0,2,1,3,1,4,0,1,1,2,0,1,2,3,0,0,1,0,4,3,1,3,3,1,3,4,4,3,1,0,4,0,3,0,4,3,1,0,1,1,4,1,1,1,1,1,1,1,0,2,2,1,1,3,0,3,2,2,1,2,2,1,0,3,3,2,1,3,1,1,2,3,3,3,3,3,3,2,1,3,1,3,1,1,3,3,3,3,1,1,3,1,3,1,1,2,1,1,4,1,1,0,1,4,1,0,0,3,0,3,4,0,0,1,0,4,0,3,3,3,1,1,1,0,3,0,3,4,0,4,3,1,3,3,3,1,4,1,1,1,3,3,3,1,3,0,0,4,3,1,3,1,3,0,3,3,0,4,1,3,0,3,1,0,1,1,3,2,2,2,2,1,3,3,1,1,3,4,0,0,2,1,3,4,3,0,3,0,0,3,3,3,4,1,1,2,2,2,1,3,2,1,3,2,2,2,1,3,2,1,2,3,1,1,2,3,3,0,4,1,2,2,2,2,2,1,2,1,3,0,3,3,4,3,0,2,2,4,2,2,0,0,1,1,1,0,3,3,3,4,1,0,3,4,1,4,3,0,1,3,0,4,1,0,1,0,0,1,4,4,1,0,1,4,0,4,2,1,0,4,0,4,3,3,4,4,4,4,4,1,3,1,1,4,1,3,1,0,4,4,3,1,3,4,3,0,3,0,4,4,4,1,0,1,4,0,1,0,3,4,3,4,0,1,1,0,0,4,0,0,1,0,4,0,0,1,1,4,3,0,3,4,1,2,2,4,4,4,4,0,0,0,4,1,1,0,4,0,1,4,0,0,3,0,1,1,4,4,4,0,1,4,4,4,4,3,4,4,4,4,0,0,0,0,1,0,3,0,0,1,4,3,0,4,4,4,4,0,1,4,0,3,4,4,1,0,3,1,0,0,1,4,0,4,1,4,1,4,3,1,3,4,1,0,0,0,3,3,4,3,0,0,1,0,3,4,3,3,4,4,4,3,0,4,4,0,1,1,4,4,1,1,1,1,0,3,0,4,4,1,1,4,4,0,0,0,3,4,4,0,4,4,4,0,1,1,0,4,1,4,3,4,1,0,0,3,0,4,3,0,0,2,1,1,3,0,0,1,3,1,2,3,4,2,4,4,3,3,3,1,1,0,1,4,1,0,3,1,3,1,2,4,1,1,0,1,3,2,3,3,3,2,3,3,1,0,0,3,1,2,2,3,2,2,2,1,1,3,3,2,4,0,1,2,2,3,2,3,2,1,2,2,2,2,3,1,2,2,3,3,2,2,1,2,1,4,1,3,1,1,3,4,3,4,3,3,2,3,1,3,1,1,3,3,3,1,3,2,1,3,2,2,2,1,1,1,3,3,1,3,3,1,2,4,2,1,0,2,3,4,2,4,0,2,2,3,2,2,1,4,1,3,2,0,4,2,1,1,1,3,0,1,2,3,1,4,1,1,2,4,2,1,1,3,3,3,4,3,1,2,4,0,4,4,2,2,4,1,0,1,3,3,3,3,3,1,1,3,3,2,1,1,0,1,3,4,3,2,1,3,3,1,1,4,1,2,2,0,0,4,1,0,2,1,0,4,4,2,0,2,0,2,4,0,2,3,3,1,1,2,4,4,0,2,1,0,4,2,0,4,2,4,4,0,3,1,2,4,3,3,0,2,2,3,1,3,3,1,1,3,0,1,1,3,4,2,2,2,2,0,2,4,3,3,3,3,3,0,4,0,0,0,0,4,1,1,1,0,1,2,2,2,3,4,3,1,1,3,4,3,1,0,4,3,3,2,3,1,3,0,3,1,1,4,0,4,0,4,4,1,0,3,0,1,0,2,1,0,2,2,3,1,1,1,1,3,1,3,3,2,2,3,3,0,2,2,4,2,2,2,2,4,4,2,2,2,4,0,2,2,2,2,2,4,2,2,3,4,3,0,4,1,3,2,4,4,4,0,4,0,4,2,3,0,3,0,0,3,3,0,0,0,2,2,2,0,3,4,2,3,4,0,4,0,2,4,2,1,0,2,0,1,4,0,0,2,2,2,2,2,2,2,1,3,2,4,4,1,2,1,3,1,1,1,4,3,2,3,0,4,0,0,3,4,4,2,3,2,4,0,3,3,1,1,3,1,2,2,2,2,2,4,0,2,0,2,1,2,3,2,1,1,1,2,2,4,2,2,2,4,3,3,2,1,3,3,2,2,1,2,2,3,0,0,2,0,0,2,0,0,4,3,2,2,1,4,4,2,3,3,4,1,2,3,0,2,3,3,1,0,2,1,1,3,1,1,2,1,0,3,3,0,0,0,3,3,1,3,1,2,1,3,1,3,1,3,3,3,3,0,2,3,1,4,1,3,2,4,3,2,3,0,3,0,1,1,2,0,1,2,3,0,4,3,3,3,2,3,3,1,4,4,1,0,2,1,1,0,4,1,1,3,1,2,2,0,3,4,4,0,1,1,4,0,4,4,3,2,3,2,4,1,2,0,3,1,0,4,0,3,0,1,4,4,4,0,0,0,4,2,0,4,4,0,3,4,4,1,3,2,2,2,1,4,0,1,2,4,2,1,1,3,1,3,2,3,3,2,1,0,0,2,3,0,0,2,3,0,0,1,4,1,3,4,1,1,0,1,2,0,0,3,0,3,2,1,2,1,3,2,1,1,1,3,4,3,1,3,2,0,2,4,0,2,0,1,3,3,0,1,3,4,2,3,1,4,4,2,1,2,0,3,2,1,0,2,1,1,4,4,0,2,2,1,1,3,2,2,1,2,3,0,1,4,4,1,3,3,1,4,1,1,4,3,0,2,3,0,1,4,1,4,0,4,1,1,1,1,1,3,3,3,3,1,2,3,3,4,0,3,3,3,4,1,1,4,2,4,2,1,1,1,0,4,3,1,3,1,3,3,0,0,3,4,0,1,1,4,3,1,3,0,4,1,2,2,3,0,1,0,3,1,0,0,1,3,1,3,3,4,3,3,0,0,1,4,3,3,1,4,4,1,0,4,2,3,2,2,4,2,1,1,2,1,0,3,2,2,4,4,4,3,1,2,3,1,3,4,1,4,3,1,4,2,3,3,2,2,1,2,2,0,3,3,3,2,4,2,4,2,3,0,2,1,1,2,1,3,3,3,1,3,3,0,1,4,2,3,1,3,1,1,4,1,2,1,2,1,3,3,3,1,2,3,1,2,2,3,2,3,1,3,3,3,3,0,1,1,3,3,3,0,1,3,2,1,0,3,0,0,4,1,1,3,1,0,1,0,2,0,1,1,3,4,1,4,3,4,0,3,0,1,1,0,0,2,2,1,2,2,0,3,1,4,1,4,2,2,2,1,3,3,2,1,4,3,4,1,3,3,3,1,0,1,0,3,3,3,0,3,2,1,1,0,1,0,0,2,0,4,1,0,2,4,3,1,1,1,1,0,1,2,3,1,3,1,4,0,1,0,1,2,1,3,0,3,0,1,2,1,3,1,2,3,2,3,2,2,1,3,1,3,1,1,3,1,2,3,2,0,0,2,1,1,0,2,3,3,1,2,1,0,2,1,1,3,3,2,3,3,2,0,3,4,4,3,1,1,0,1,0,4,2,0,0,1,3,3,1,2,0,3,1,0,1,3,4,1,3,3,0,3,1,3,2,3,1,0,4,3,1,2,3,2,3,3,2,1,3,2,0,2,3,3,2,2,0,4,3,1,1,1,3,0,3,0,3,4,1,0,4,3,2,4,2,4,0,3,0,0,0,3,3,1,3,1,4,1,3,3,1,0,1,4,2,0,1,4,3,0,0,4,2,0,1,4,4,2,0,2,4,4,4,2,0,4,4,3,2,0,2,0,0,4,3,3,3,3,0,3,3,3,2,1,3,1,4,0,4,1,0,1,4,3,1,4,1,1,4,1,3,0,3,0,1,1,3,3,2,3,3,2,3,1,3,2,2,1,1,3,3,1,3,1,1,4,2,3,0,3,1,3,3,4,2,4,3,1,0,2,3,3,0,0,4,3,4,2,3,3,3,4,1,2,1,1,3,3,1,2,2,4,0,4,4,4,3,1,3,3,3,4,2,0,4,2,0,2,3,4,1,0,1,2,4,2,3,4,2,3,1,2,1,1,0,1,2,1,3,3,2,4,2,3,3,4,0,1,1,3,1,1,3,2,1,2,2,2,4,2,2,1,4,1,0,4,3,1,3,0,2,1,2,1,1,3,3,3,2,2,2,1,1,1,4,0,2,1,1,0,1,3,3,0,4,4,4,4,4,4,3,0,4,1,3,4,1,0,0,0,4,1,1,3,0,4,0,4,0,1,0,4,4,3,1,3,4,3,0,1,1,0,0,1,4,4,3,1,0,4,0,3,4,4,3,3,0,3,4,1,4,0,0,1,4,2,0,3,0,0,1,0,1,2,4,0,1,1,3,1,3,3,3,1,3,4,1,1,1,3,4,4,1,0,1,4,3,0,4,0,0,2,1,1,2,0,2,1,1,0,1,3,4,3,1,4,3,3,2,2,4,2,3,2,4,1,3,0,1,4,4,3,4,4,0,0,0,4,0,3,1,2,3,3,0,1,4,0,3,0,0,3,4,4,1,0,0,3,4,4,4,1,0,3,1,0,4,4,3,3,0,3,3,4,4,1,3,1,2,2,0,3,3,3,1,4,2,4,4,1,2,1,1,1,2,4,0,0,4,1,3,0,4,3,0,4,1,4,0,1,1,3,0,3,1,3,3,3,4,1,3,3,3,0,4,4,0,3,0,1,3,3,0,0,4,1,0,0,4,2,3,3,3,1,1,3,4,0,4,1,0,4,0,1,2,3,1,3,0,3,3,3,4,2,1,1,1,3,3,3,1,3,3,1,3,4,1,3,4,3,4,0,3,1,3,3,3,0,2,0,4,1,1,1,4,1,4,3,4,0,4,1,1,0,1,3,1,1,3,4,3,0,3,1,2,3,3,3,1,3,0,3,0,1,2,4,1,1,3,1,4,3,4,4,0,1,0,4,1,3,4,4,4,0,1,1,0,3,4,4,1,4,0,0,3,4,4,3,0,1,4,1,3,3,1,3,3,1,4,3,3,4,0,3,1,0,3,4,0,3,1,1,3,3,3,3,3,4,1,1,3,1,3,0,3,3,1,3,1,3,3,1,0,4,1,3,1,3,4,2,1,0,3,1,0,3,1,1,1,2,4,0,3,3,3,4,4,1,3,4,0,1,3,0,0,1,3,3,0,3,1,1,1,0,1,0,0,4,1,4,2,0,1,3,4,3,1,1,3,4,4,3,1,3,3,3,0,0,2,3,3,3,3,3,3,1,1,3,1,3,3,1,3,3,1,4,3,0,1,3,1,3,0,1,3,4,4,0,0,0,4,4,4,4,3,0,0,4,1,4,1,0,0,4,4,0,0,1,3,1,0,0,0,0,2,0,0,3,0,0,4,4,4,0,1,0,0,4,0,4,0,0,0,4,3,4,3,0,3,0,0,0,4,0,4,1,3,4,3,1,4,2,0,0,0,4,0,3,4,3,3,3,1,0,0,3,0,0,1,1,0,3,3,4,0,2,0,3,3,3,4,0,3,2,4,0,2,1,4,4,4,0,4,4,0,0,4,4,0,1,0,1,0,0,4,3,0,1,1,0,0,3,0,3,0,4,0,3,0,0,1,4,2,4,0,4,4,0,2,4,2,4,0,2,0,3,4,4,4,1,4,0,2,4,3,3,0,4,3,0,2,1,4,3,0,4,3,4,1,1,2,1,2,4,1,0,0,2,0,3,1,0,1,3,3,4,4,3,4,3,0,1,0,0,1,4,4,0,3,1,3,0,4,3,1,4,0,4,1,0,0,1,2,4,1,3,3,0,4,0,4,3,1,0,3,3,3,2,4,2,0,4,0,4,4,0,0,4,4,4,0,0,3,4,4,2,1,3,0,0,0,1,4,2,2,2,4,4,0,0,0,1,3,3,2,2,4,1,2,4,2,2,2,3,1,4,0,1,0,4,0,2,4,3,2,2,4,1,4,1,1,0,2,2,2,4,3,1,2,0,1,0,4,3,0,4,1,1,1,4,1,0,0,3,1,3,1,2,4,3,2,4,4,4,2,2,0,2,2,4,2,4,4,4,0,4,2,0,2,2,4,1,2,1,2,2,2,0,2,2,2,2,0,2,2,2,1,1,3,2,2,2,2,0,0,3,2,3,0,2,1,4,3,1,1,0,0,3,2,2,3,3,4,1,2,1,2,0,2,1,3,3,4,3,3,3,2,3,1,0,3,1,0,2,2,2,2,4,4,4,2,1,3,4,2,2,2,2,2,2,1,3,0,2,2,3,2,3,0,2,2,2,0,1,1,4,4,3,4,2,2,0,1,0,1,0,3,2,2,0,1,1,4,3,2,1,3,1,3,3,4,1,0,3,3,3,1,3,1,3,3,2,1,1,2,2,1,1,1,2,2,2,3,2,1,3,1,1,3,3,2,3,2,3,2,2,3,2,3,1,2,1,3,3,1,1,1,1,3,3,2,3,1,3,3,3,2,1,3,1,1,3,1,1,1,1,3,3,1,3,1,1,3,1,3,3,1,1,0,3,2,3,1,1,3,3,3,1,1,1,2,3,3,3,3,3,1,1,1,1,1,3,1,3,3,1,3,1,3,3,1,3,1,1,3,1,1,3,1,3,1,1,1,1,3,1,1,3,3,3,3,1,0,3,1,3,3,1,3,1,3,3,1,3,1,1,1,3,1,1,2,1,3,3,1,3,2,3,3,1,1,0,0,1,1,3,1,0,3,1,2,1,2,4,2,3,2,1,1,3,3,3,0,1,3,1,3,0,1,0,2,0,4,3,1,1,1,3,1,0,1,1,1,0,1,4,3,1,1,3,1,1,4,0,1,3,4,3,3,1,3,1,3,1,4,0,4,4,0,4,3,3,0,4,1,0,1,3,0,4,3,1,3,3,3,0,1,0,1,0,0,3,0,3,1,0,3,0,3,1,4,3,3,4,1,1,0,4,0,1,4,1,2,3,3,4,1,0,4,2,4,0,3,0,0,0,2,2,4,0,1,1,0,1,1,4,4,0,4,0,0,4,0,3,4,4,0,1,1,3,1,1,0,0,3,1,0,3,1,3,3,3,4,4,0,4,4,3,1,0,3,4,1,3,0,4,1,0,1,1,0,0,2,0,1,0,3,4,2,0,2,2,3,2,1,4,3,4,4,1,3,1,3,2,4,0,0,0,2,2,2,1,0,4,0,4,0,1,1,4,1,1,1,3,3,3,0,0,1,1,4,4,3,4,4,3,0,2,2,1,2,1,3,3,1,1,1,3,4,1,3,1,1,1,3,0,4,3,3,3,1,4,4,1,3,0,2,4,3,0,0,4,3,1,1,3,2,3,0,1,2,0,0,3,3,1,1,1,2,3,3,2,3,2,1,2,3,1,1,1,2,1,3,2,2,1,1,2,4,3,2,4,2,2,2,4,2,2,4,4,4,4,2,2,0,1,1,2,3,3,0,2,3,4,0,2,0,4,0,2,4,4,4,0,3,0,4,2,2,2,0,0,0,0,0,4,4,0,4,0,0,0,4,2,2,1,2,3,1,3,3,4,0,1,4,2,3,3,1,2,1,2,3,2,1,1,2,1,4,1,1,2,2,1,1,3,2,2,2,4,2,2,1,2,1,2,3,3,3,2,3,3,3,2,4,2,2,2,0,0,1,4,0,2,3,1,1,2,0,1,3,2,2,2,1,0,3,2,2,1,0,0,0,1,4,1,3,0,1,2,2,4,2,2,0,0,0,4,0,0,4,4,4,0,0,0,4,4,1,3,3,1,0,4,4,0,1,0,3,4,0,1,3,3,1,1,0,1,3,3,1,3,2,2,0,3,0,2,2,0,0,0,1,0,3,0,0,4,0,3,3,4,0,2,4,4,4,4,1,4,2,1,0,1,0,0,4,0,3,3,3,1,3,1,0,1,0,4,0,4,4,0,4,0,0,0,0,1,4,1,1,3,0,0,0,1,4,0,1,4,0,1,0,1,4,4,0,0,0,4,0,0,3,4,1,4,3,1,4,3,2,4,0,0,1,3,2,2,1,1,1,0,0,1,0,3,2,2,0,3,4,4,3,0,0,3,1,3,3,0,4,4,3,0,3,0,1,0,0,0,1,3,0,4,1,0,3,3,2,4,1,3,1,1,3,3,1,1,4,1,0,4,3,4,0,4,4,3,4,3,4,0,0,3,4,4,4,3,1,3,2,0,1,4,0,3,4,1,3,3,1,3,3,2,4,3,4,1,3,1,3,1,1,4,0,1,3,3,1,3,3,1,0,3,1,3,3,2,1,4,1,1,3,3,4,1,1,3,0,4,1,3,3,0,2,1,3,1,0,3,4,4,3,1,1,4,3,3,2,1,4,3,1,0,4,3,3,1,4,3,3,0,4,3,2,3,3,4,1,3,2,2,3,1,3,0,1,1,2,2,3,2,4,3,2,2,2,1,1,1,3,2,2,0,2,2,2,0,2,2,4,2,1,2,1,1,1,1,1,3,0,2,3,2,3,3,0,3,0,3,1,2,2,2,1,2,3,3,2,4,1,0,0,2,1,3,1,0,4,1,3,0,3,0,4,3,3,3,3,4,0,0,4,4,0,1,3,0,1,1,3,3,3,4,4,4,0,1,4,4,4,0,1,1,3,3,4,1,2,0,3,4,1,3,2,0,2,2,2,2,2,0,3,0,2,3,1,1,0,3,1,1,3,3,0,0,2,2,3,1,2,1,2,1,1,3,1,3,3,4,4,3,1,4,3,0,0,2,2,4,0,2,4,2,2,3,1,1,2,3,1,4,1,0,1,1,3,3,2,3,2,2,3,3,1,2,1,4,3,3,2,1,0,0,4,0,0,4,3,2,1,3,4,3,2,4,4,1,4,1,2,4,4,0,4,2,1,4,0,2,2,2,1,2,4,2,1,3,0,2,2,4,2,0,3,2,2,2,4,1,2,0,0,1,1,1,4,1,4,3,1,2,4,0,1,2,2,4,0,3,3,2,3,1,0,1,1,3,1,3,2,2,4,4,4,1,3,1,1,4,4,2,1,1,4,3,3,0,2,2,3,2,3,3,4,2,1,1,0,2,1,2,4,3,2,2,3,4,3,2,1,4,1,3,0,1,3,3,0,2,2,2,0,4,1,3,3,2,0,4,2,2,1,3,3,2,0,2,1,1,3,0,1,1,4,0,0,1,4,2,1,1,0,1,1,3,1,1,0,1,4,0,1,1,0,1,0,0,1,4,1,4,3,2,2,4,0,0,1,1,2,3,2,1,0,1,1,4,2,3,2,4,1,3,3,2,2,4,4,2,1,4,3,3,2,3,4,2,2,3,1,1,3,1,0,1,3,0,2,3,3,4,3,3,1,1,3,2,1,0,1,3,4,3,2,1,1,4,4,1,3,2,2,1,1,4,0,4,3,3,0,4,4,0,0,4,0,0,4,0,0,4,0,0,4,4,0,4,4,4,4,4,0,0,4,0,1,4,4,3,1,3,3,0,1,3,2,1,3,0,4,2,2,1,2,1,2,1,2,1,4,3,1,4,2,1,2,0,1,1,3,0,4,0,3,0,2,2,3,4,3,4,2,3,1,4,1,0,1,4,1,1,0,4,0,1,0,0,0,4,2,1,3,0,1,3,1,1,3,2,2,2,1,1,3,2,1,4,4,1,0,1,1,1,3,3,4,3,3,1,4,4,0,2,0,3,1,1,1,4,1,1,1,3,3,0,0,4,4,1,4,3,1,2,3,3,1,3,1,3,1,1,1,1,0,0,4,1,1,1,1,1,3,1,3,3,3,1,1,3,1,1,3,3,3,1,1,1,1,3,3,1,3,3,3,1,4,1,1,0,3,4,3,3,1,2,3,2,0,3,4,4,1,3,3,3,3,1,4,3,4,1,3,0,1,1,3,3,2,2,1,3,1,2,3,2,2,2,2,2,2,2,2,1,1,3,1,1,1,1,1,3,1,4,4,4,0,0,0,4,4,4,4,4,0,0,4,0,0,4,0,4,0,4,1,3,1,3,3,1,1,2,3,2,2,2,1,3,1,1,3,3,2,2,0,0,4,1,1,4,3,3,2,4,2,3,0,0,2,2,2,3,1,3,2,2,2,0,1,4,3,1,4,0,3,4,4,0,2,0,2,0,2,0,0,4,4,2,2,0,4,4,0,0,2,4,2,4,4,2,0,2,2,2,4,2,0,2,0,0,2,2,0,4,0,0,4,4,2,4,0,0,4,0,0,0,2,0,2,0,0,4,0,3,4,4,4,4,4,3,1,1,1,4,0,3,1,0,0,1,3,1,0,2,0,4,1,1,1,3,2,1,3,3,3,4,4,4,1,2,3,3,1,2,4,3,2,2,2,1,3,1,2,2,2,3,3,3,3,1,0,3,1,3,3,3,1,3,1,3,3,3,1,1,4,3,3,3,1,1,3,1,1,1,1,1,4,1,4,3,1,1,1,1,0,4,4,4,1,3,1,1,1,4,1,3,1,0,3,1,3,1,3,3,1,3,1,3,4,1,1,3,1,3,3,2,2,3,1,0,3,3,1,3,1,3,2,3,2,1,1,3,3,3,0,1,1,2,1,1,1,2,3,0,1,1,3,4,3,2,3,1,1,3,3,3,1,3,3,4,3,0,3,4,4,1,1,0,4,0,0,1,4,0,3,2,1,3,3,1,0,0,0,2,0,0,4,2,3,0,0,0,2,0,0,1,3,4,2,1,3,2,2,2,1,3,1,2,3,3,0,3,4,4,1,2,1,2,3,3,1,0,3,2,1,2,1,3,1,4,0,2,0,4,2,3,2,2,1,2,1,3,0,1,3,4,0,4,1,0,4,0,4,0,2,2,0,1,1,2,3,2,1,3,2,3,4,2,0,2,2,3,2,0,2,4,0,4,0,2,4,3,3,1,1,2,2,1,2,3,3,4,1,2,2,3,3,3,1,1,0,1,0,1,0,1,2,1,3,2,4,4,1,2,0,0,3,0,3,0,2,3,3,4,4,0,0,3,1,2,4,4,0,3,1,4,4,4,4,0,3,0,3,2,3,3,1,1,3,2,3,2,2,1,2,1,1,3,4,4,0,0,3,3,3,4,1,4,1,1,3,2,2,3,2,4,0,4,3,4,2,1,1,1,1,3,3,1,0,4,2,1,3,3,4,0,0,0,0,1,1,4,2,4,3,4,2,2,2,0,2,3,3,3,2,2,4,1,1,1,3,3,0,0,2,2,4,4,3,0,4,3,0,0,4,4,0,1,0,1,3,0,2,3,3,3,2,4,1,3,1,3,0,0,4,2,0,1,3,1,0,1,4,2,4,1,0,1,1,2,3,3,1,2,2,2,3,2,1,2,3,3,2,2,2,2,2,2,2,2,2,0,2,2,4,4,2,2,2,1,1,1,4,3,1,0,4,3,1,0,1,2,1,0,0,0,1,3,4,2,1,1,3,3,4,0,2,3,4,2,3,3,0,4,1,2,0,1,3,0,1,2,3,1,4,3,4,1,0,3,3,4,4,3,1,3,1,3,4,0,4,0,2,1,3,1,2,2,2,2,2,3,1,0,1,3,3,1,3,1,1,1,2,1,1,2,2,2,1,0,3,3,1,4,3,1,1,1,3,1,1,2,2,3,1,4,3,3,2,1,3,1,3,1,3,4,3,3,3,3,1,1,1,1,3,1,1,1,1,1,4,1,2,1,3,1,2,0,2,4,3,3,1,2,2,3,4,1,4,2,3,0,4,0,4,0,0,0,1,4,1,3,3,3,4,1,1,1,3,3,1,2,3,1,1,1,1,1,1,4,1,1,1,0,0,1,3,1,3,3,0,1,0,2,1,4,2,3,2,2,3,1,1,3,3,1,3,2,3,1,1,3,1,2,2,1,1,2,3,4,2,1,2,2,2,2,2,3,1,2,3,1,3,1,3,3,3,1,1,1,3,1,0,4,2,3,3,2,2,3,1,4,3,2,3,1,1,0,1,1,2,1,1,0,3,3,1,3,4,2,1,1,1,1,1,2,2,1,2,1,2,0,1,3,2,1,1,1,3,3,3,0,3,0,1,0,3,3,3,1,1,1,1,1,2,1,3,2,3,3,0,2,2,3,2,2,3,2,4,2,2,4,0,2,2,2,3,2,3,3,1,3,1,1,2,2,2,3,3,3,4,2,2,3,1,1,2,3,1,1,1,4,2,1,3,1,3,2,3,3,4,1,0,4,3,3,3,3,3,0,3,1,4,3,3,2,0,0,1,1,3,3,2,4,3,4,0,1,0,4,4,0,2,1,2,3,3,4,1,1,1,3,3,3,1,4,4,3,1,1,3,3,4,1,3,4,1,3,3,4,1,3,0,3,4,0,4,1,1,4,1,3,2,0,2,1,3,3,4,3,2,0,1,2,2,3,1,3,4,3,0,2,3,1,0,0,1,3,3,1,1,2,3,4,2,0,2,0,4,0,2,0,3,2,0,2,2,0,4,4,0,4,1,0,3,1,3,1,3,1,4,4,1,2,1,0,3,2,3,3,0,3,4,2,0,2,2,0,2,0,4,4,4,2,3,0,4,4,4,2,3,3,0,2,4,2,0,4,2,0,4,2,3,2,2,0,0,2,2,0,2,4,4,0,2,4,0,0,2,2,4,3,1,2,4,2,1,3,2,4,3,3,2,3,1,2,2,3,3,0,2,0,4,2,2,3,4,1,3,1,1,1,3,1,0,3,2,4,2,0,1,3,3,3,1,3,0,4,1,1,2,0,1,4,4,0,3,1,0,1,2,2,2,3,1,0,4,2,1,4,2,4,0,2,1,0,0,0,0,3,4,3,0,2,2,0,0,3,2,2,0,2,1,1,4,1,2,2,2,2,0,3,4,0,1,0,2,4,0,4,4,0,4,1,4,0,2,3,2,1,1,4,4,4,3,1,0,1,4,4,3,4,4,4,0,3,4,4,4,4,1,4,1,4,3,1,0,1,0,3,2,3,0,4,4,1,4,0,0,4,2,3,1,1,1,3,1,3,3,1,3,1,3,1,2,1,4,1,1,4,4,4,4,0,4,1,0,0,4,4,1,4,4,4,4,0,3,1,3,3,1,1,2,2,2,0,0,2,0,4,4,4,0,0,0,0,4,4,4,4,1,3,0,4,0,0,4,4,0,1,4,4,3,0,0,1,1,3,0,0,4,1,0,0,1,0,3,4,3,4,4,4,0,4,1,0,0,1,4,0,4,4,4,3,2,2,3,4,1,3,4,3,2,3,2,3,0,1,4,4,4,1,1,1,4,0,3,0,4,0,2,2,4,4,4,4,0,0,0,4,0,0,4,2,2,2,2,2,0,0,2,2,2,2,2,0,2,2,2,2,4,2,2,4,2,2,4,2,2,2,2,0,2,2,4,2,0,2,2,2,2,2,2,2,2,4,4,2,2,2,4,2,2,4,2,2,2,4,2,2,3,2,2,2,2,2,2,2,2,2,2,2,2,2,2,4,2,4,2,2,2,2,2,2,2,0,2,2,2,2,2,2,0,0,2,4,0,4,0,2,2,2,2,4,2,2,2,2,2,2,2,2,2,4,2,2,0,2,0,0,2,4,4,2,2,2,2,2,0,0,2,2,2,2,0,2,2,0,4,2,2,2,0,2,2,2,2,4,4,2,2,4,2,2,0,2,2,2,2,2,2,2,2,0,0,2,1,0,2,2,2,4,2,2,2,2,2,2,0,4,0,2,2,2,2,2,2,2,2,2,2,3,1,2,3,3,3,1,0,3,1,1,1,1,0,1,2,3,3,3,0,3,3,3,1,2,2,1,4,1,3,1,3,0,1,0,3,3,3,1,1,1,0,4,2,0,1,2,2,2,2,1,2,4,3,0,4,0,3,0,4,2,2,3,2,2,0,0,2,2,0,0,0,4,4,2,2,0,2,2,2,0,4,4,0,4,2,4,4,2,4,0,2,2,2,0,4,2,2,2,4,0,4,2,4,4,0,0,4,4,0,4,4,4,0,3,1,3,0,0,4,0,4,4,4,4,0,4,0,3,0,3,0,0,4,4,0,0,1,4,4,1,4,1,3,0,3,3,0,3,4,3,4,4,4,1,2,0,4,0,3,3,0,3,2,1,4,2,2,1,0,4,0,0,0,2,1,0,4,4,2,0,4,4,4,0,4,2,2,4,0,4,4,4,2,2,0,4,0,1,0,1,1,4,0,0,2,4,3,2,0,1,2,2,3,1,2,0,1,0,4
B127,0,0,0,4,4,1,4,3,4,2,4,4,1,1,1,2,2,1,1,3,3,1,2,1,1,4,1,4,3,4,0,0,2,1,3,3,1,0,2,0,0,4,2,1,0,1,1,0,3,3,2,0,0,4,4,4,3,0,0,3,1,0,2,0,3,0,0,2,1,4,4,4,4,0,0,0,0,4,0,4,2,1,0,4,3,3,1,1,4,4,0,1,3,3,1,1,2,2,2,3,2,1,3,1,1,3,0,3,3,2,4,3,1,1,4,4,3,4,0,0,0,1,4,2,3,0,4,4,4,4,0,3,3,1,3,0,3,0,0,4,4,1,0,4,3,0,3,4,3,3,3,1,1,1,1,0,1,1,1,2,4,4,0,4,1,3,1,1,3,0,2,2,4,3,2,3,3,4,0,3,0,4,0,4,0,3,1,0,0,4,1,1,3,1,2,1,0,4,3,1,1,3,1,1,0,0,1,3,1,1,3,1,1,4,1,1,3,4,3,1,3,1,4,1,4,1,0,0,0,1,4,1,1,4,1,4,3,4,4,4,4,3,3,1,1,0,2,2,3,1,1,0,4,3,4,1,0,1,3,1,4,0,3,4,3,3,4,4,4,0,4,4,1,0,3,4,1,3,1,2,3,1,4,4,3,3,3,1,4,0,1,2,2,2,2,1,3,0,4,0,0,0,1,2,1,0,3,3,4,3,4,1,4,4,3,1,0,0,1,0,3,4,3,1,0,1,3,3,4,3,1,1,3,3,3,1,3,0,3,3,1,4,3,3,4,2,1,2,2,2,4,2,2,1,4,1,1,3,1,2,1,3,3,1,2,4,1,4,0,3,4,0,0,2,4,4,0,0,3,3,1,0,1,4,3,4,3,4,4,0,1,1,3,1,2,1,0,4,2,1,3,4,0,1,3,1,1,0,4,3,2,1,1,1,1,0,3,4,3,1,0,3,1,1,4,0,4,0,0,0,0,1,1,3,1,2,2,2,2,2,2,0,0,2,2,2,2,2,0,2,0,2,0,2,2,2,2,0,4,2,2,2,4,4,2,0,0,0,4,0,0,4,4,4,4,0,0,0,0,0,4,0,2,0,2,2,2,0,2,2,2,2,2,4,2,4,2,0,4,0,0,0,0,0,2,2,0,0,0,0,4,1,0,4,2,4,0,2,4,2,2,4,2,0,0,0,4,0,2,4,2,2,2,4,2,0,2,4,2,2,4,4,2,0,2,0,2,2,4,2,4,0,2,0,4,0,4,0,4,4,4,4,4,4,0,0,0,4,2,2,2,0,4,0,4,0,0,2,2,2,2,0,2,2,4,2,2,2,2,2,2,0,4,0,2,0,2,0,4,0,0,0,2,4,0,4,2,0,0,4,2,2,0,0,0,2,2,2,2,2,2,0,0,4,2,0,2,0,0,0,2,4,4,2,0,2,0,2,0,2,0,0,2,4,2,0,0,4,4,2,4,2,4,4,2,0,2,0,4,2,2,2,4,2,2,4,4,4,2,0,4,4,4,0,4,0,2,2,0,2,0,4,4,4,0,4,0,2,4,4,2,2,2,2,2,2,2,2,0,2,2,0,0,0,4,4,4,4,0,4,0,4,4,0,4,4,0,4,0,0,0,0,4,4,4,4,4,0,4,4,0,4,0,4,0,0,0,0,0,4,4,4,4,0,4,4,4,4,0,0,2,2,4,2,0,0,4,4,0,4,2,2,4,4,2,2,2,0,2,2,0,4,4,2,2,0,4,2,2,2,2,0,2,2,2,4,2,2,0,4,0,0,4,1,3,0,1,0,2,2,2,2,2,2,2,0,3,0,3,0,4,4,4,3,4,3,1,0,2,2,4,0,3,3,1,1,0,0,4,1,0,0,0,3,0,0,4,0,4,4,4,3,1,3,1,4,0,4,0,1,0,1,1,3,3,3,4,1,0,0,2,4,0,0,2,4,3,3,1,4,1,2,2,2,2,4,4,2,2,3,2,1,3,3,1,3,1,1,1,2,3,2,1,0,1,4,4,3,1,1,3,1,1,4,3,0,2,3,4,3,0,1,3,3,1,3,2,2,4,3,1,2,2,3,1,4,3,3,3,3,1,2,3,3,3,3,2,2,0,3,2,1,2,2,0,3,3,3,4,1,1,2,4,2,0,2,2,2,2,2,2,2,3,2,2,1,1,2,1,2,3,2,3,3,1,2,4,4,3,0,4,2,4,2,2,0,1,2,4,1,2,2,1,0,1,0,3,3,1,3,4,4,0,3,2,2,2,0,2,0,2,0,0,3,3,3,3,0,3,4,1,3,3,1,3,3,3,3,1,3,1,1,0,2,2,0,0,4,2,4,3,4,1,0,2,3,2,3,0,4,2,4,4,3,1,4,4,4,1,4,3,2,1,3,2,4,4,0,0,1,0,0,2,1,3,4,3,2,4,3,3,0,0,4,3,4,3,4,1,3,2,1,0,2,2,2,2,2,4,1,0,4,2,1,4,2,1,0,3,4,1,1,3,1,2,2,1,3,3,1,4,4,1,2,1,2,2,3,3,2,2,0,2,4,4,1,4,0,2,2,4,0,2,0,0,2,3,3,3,1,1,4,4,4,1,4,0,1,4,0,4,1,4,0,2,3,1,3,3,4,2,3,1,4,1,1,2,0,1,2,2,1,0,2,0,3,4,3,2,3,4,1,1,3,3,0,0,0,2,1,1,3,1,3,2,4,0,2,0,1,3,1,3,2,1,3,1,1,4,4,1,1,2,2,2,4,3,1,1,1,3,2,3,4,1,1,0,3,1,4,0,3,2,3,0,1,2,1,4,4,1,1,0,0,4,0,3,3,2,4,3,0,1,3,0,0,1,1,1,1,0,3,2,1,1,2,3,4,0,3,1,1,3,1,1,4,1,1,1,3,2,3,1,2,3,2,2,0,3,1,0,0,1,1,4,3,3,3,4,2,0,0,2,1,3,2,0,2,0,3,0,3,3,1,2,3,0,3,4,1,3,1,1,3,3,0,4,1,3,3,0,1,3,1,1,1,3,1,3,1,3,3,1,1,2,3,4,1,1,1,2,4,2,2,4,1,4,1,2,1,2,3,0,2,2,3,3,2,3,3,3,2,3,4,3,3,1,3,0,4,3,3,0,4,3,1,0,3,3,1,3,3,0,0,4,1,1,2,4,3,1,1,2,4,3,0,4,3,1,0,0,3,3,3,2,2,1,1,0,0,0,4,2,4,3,4,0,2,3,3,2,1,4,4,4,1,4,1,1,1,2,2,1,3,0,2,3,0,4,3,2,4,2,0,2,3,1,3,0,2,0,1,3,3,3,1,1,4,3,0,1,4,2,1,3,3,2,3,3,4,1,4,3,2,0,3,1,1,4,1,2,4,1,1,0,0,0,0,1,3,1,3,3,1,0,1,2,2,2,1,1,3,4,1,3,2,2,1,4,1,3,1,1,0,1,1,4,1,3,2,1,3,3,3,3,3,1,3,3,0,4,1,0,1,2,2,2,2,3,4,0,1,0,0,2,1,2,2,3,2,4,4,2,2,0,1,2,4,2,2,2,0,2,1,2,0,0,2,4,0,0,3,2,2,0,0,0,2,4,4,2,0,4,2,2,4,2,2,4,4,2,4,4,2,0,2,3,2,4,2,2,1,2,0,4,2,2,0,0,2,4,0,4,0,0,1,2,0,0,2,2,2,2,2,2,0,2,4,0,0,0,2,2,2,2,4,0,2,0,2,2,2,2,0,2,4,0,1,3,3,2,2,1,0,0,4,1,3,2,3,2,4,4,2,2,2,0,0,3,1,1,3,0,4,3,1,0,1,0,0,1,3,1,2,0,4,2,0,4,1,1,3,3,4,0,4,0,4,4,3,2,2,3,4,0,0,4,1,0,3,3,4,4,0,2,2,4,2,3,3,1,0,2,3,1,3,3,3,0,3,2,4,3,1,4,3,1,1,3,4,0,3,4,4,3,0,3,4,4,3,4,0,0,4,4,3,1,2,0,4,0,0,0,0,4,1,1,0,0,0,0,0,4,2,3,2,4,1,1,3,3,4,4,0,4,0,0,0,4,0,4,4,3,2,3,4,4,3,3,4,3,4,4,4,4,0,2,4,0,0,2,0,4,0,2,0,2,2,0,0,0,4,2,0,0,4,0,0,0,4,2,4,4,2,4,4,0,2,0,0,2,4,3,1,4,1,4,3,1,4,0,0,1,3,2,0,4,3,1,4,1,0,4,4,4,4,0,4,0,0,4,2,2,0,4,2,0,0,0,2,2,0,0,0,2,4,4,4,2,0,4,2,0,2,1,1,1,3,3,1,3,2,1,1,1,1,4,3,1,3,3,1,4,1,2,2,4,3,3,3,4,2,1,4,3,1,1,3,3,1,2,0,0,1,3,1,4,2,4,1,4,3,3,1,1,1,0,0,3,4,1,3,1,4,1,3,1,0,3,0,1,2,0,2,3,0,2,3,1,0,2,1,1,3,4,0,3,0,3,0,1,3,0,3,2,3,3,4,4,2,3,2,2,3,3,2,3,1,2,3,2,0,2,4,2,2,2,4,2,4,1,4,1,1,1,2,2,1,0,1,3,3,2,2,1,3,0,1,4,4,0,1,3,0,0,4,2,2,2,3,0,0,1,0,1,4,1,3,2,4,2,4,0,0,2,2,2,3,2,2,2,2,2,2,2,2,0,2,3,2,2,2,4,2,0,3,1,3,3,1,0,1,0,1,1,1,1,0,0,3,0,0,0,4,4,0,0,0,0,4,4,4,4,3,3,4,4,4,4,1,4,0,0,1,4,3,3,1,4,3,3,1,0,0,1,4,0,0,3,3,2,3,0,1,0,0,4,4,4,0,1,2,0,3,2,1,0,1,4,1,4,4,0,0,3,2,2,1,4,4,2,0,4,2,3,1,4,2,2,0,0,0,3,2,0,3,2,4,1,1,1,4,4,2,2,4,3,1,2,0,4,0,1,4,4,1,1,1,1,3,3,1,2,1,4,3,3,4,0,4,0,4,1,3,3,0,4,3,0,4,4,4,0,1,1,1,1,3,3,2,3,1,0,3,1,3,3,0,3,1,1,3,3,4,0,4,4,0,3,0,1,4,0,1,4,1,1,4,4,0,1,1,3,1,4,1,1,1,4,1,3,4,3,4,3,1,2,1,2,1,1,3,4,3,1,4,3,3,0,0,4,1,2,4,0,0,0,3,2,2,3,1,2,2,2,2,2,2,2,2,2,2,2,2,2,3,0,3,4,4,2,3,4,1,4,2,4,2,0,3,0,3,0,2,3,2,0,4,4,3,4,0,3,3,2,3,1,4,3,1,2,2,2,2,2,2,3,3,2,2,2,0,1,0,0,2,3,3,3,2,4,2,3,3,1,3,3,1,0,3,1,3,3,1,0,0,3,4,4,2,2,4,2,1,4,3,2,1,4,4,1,4,3,1,4,0,1,3,1,1,1,1,3,3,4,1,3,4,0,3,3,4,1,0,4,0,0,3,4,3,1,1,4,1,1,3,0,4,4,0,4,0,4,2,0,4,2,4,3,4,4,3,1,0,1,1,0,4,0,4,1,3,0,3,3,4,0,0,3,3,4,1,4,3,4,3,4,0,1,2,4,4,4,0,0,4,0,3,3,0,3,0,4,4,2,4,0,1,1,4,0,0,1,3,3,0,1,4,1,1,0,3,1,0,0,3,4,4,0,4,4,1,0,3,3,0,1,4,1,4,0,1,3,1,0,2,0,0,1,4,1,0,4,0,2,2,2,2,0,4,4,2,0,4,2,2,2,4,1,2,4,0,0,3,2,4,4,4,0,2,4,0,0,2,4,4,0,4,0,4,1,4,4,1,0,4,4,0,1,4,0,4,0,4,4,0,4,4,4,0,4,2,0,0,3,0,4,2,0,4,3,1,1,4,2,4,3,0,4,2,0,2,0,2,4,1,4,4,0,3,0,4,0,2,0,3,4,2,4,2,0,0,2,2,0,0,0,4,0,2,4,0,4,0,0,2,2,0,4,0,0,0,4,4,0,4,0,0,0,4,4,0,4,0,0,4,4,4,2,4,2,2,4,0,0,4,0,4,4,2,4,2,4,4,4,4,4,4,4,0,0,0,0,4,2,4,0,0,4,2,0,4,4,2,4,4,4,2,0,0,2,3,4,1,3,0,3,2,3,1,3,4,0,2,1,2,2,4,2,1,1,1,3,3,2,3,3,2,3,1,3,3,2,1,3,1,0,3,0,1,3,4,0,2,3,0,4,3,3,1,4,1,0,1,1,2,0,1,0,4,4,1,1,3,4,2,0,3,1,3,3,1,1,3,3,4,1,1,4,4,4,3,1,1,3,4,4,1,3,2,1,3,3,2,2,3,2,0,0,3,3,1,1,3,0,2,1,3,1,4,3,3,1,3,1,1,3,1,3,1,0,2,0,3,0,3,4,3,1,1,3,2,0,4,3,2,1,3,0,3,1,2,1,3,2,0,1,1,4,2,0,2,3,2,0,4,3,1,1,2,2,1,1,3,4,4,2,0,0,0,2,2,2,0,4,2,2,0,4,2,4,0,0,0,2,0,4,4,2,2,0,4,4,2,4,4,2,2,2,4,2,2,2,0,2,0,0,2,0,4,2,0,4,0,2,2,2,2,2,4,0,4,4,4,2,2,0,2,0,0,2,2,2,0,2,0,0,4,2,2,2,2,4,4,4,0,4,2,0,4,4,0,4,4,4,2,0,2,4,2,0,4,0,2,0,4,4,0,0,2,2,4,2,4,4,0,4,4,0,0,4,2,0,2,4,0,4,4,4,0,2,0,2,0,2,4,4,2,4,2,0,2,4,4,2,4,0,0,0,0,2,4,0,2,0,4,2,2,2,2,2,2,0,4,0,2,0,2,2,4,2,0,0,2,4,0,0,0,2,0,0,2,2,0,2,2,2,4,4,0,0,2,0,0,2,2,4,3,0,0,1,0,4,4,4,4,4,4,4,4,1,4,2,4,2,4,3,3,0,4,2,2,4,4,0,2,4,2,2,0,1,2,1,2,2,2,2,3,0,2,2,4,4,3,2,2,4,2,3,2,4,2,4,2,4,1,0,2,2,2,4,4,0,1,2,0,4,1,4,2,3,2,2,3,4,4,3,3,3,4,1,2,1,1,1,2,1,4,4,2,4,2,2,2,3,1,0,2,2,1,4,3,4,2,2,3,2,3,2,0,2,2,1,2,1,0,0,1,0,1,3,2,4,0,4,0,3,2,4,4,2,2,1,3,3,3,2,2,0,3,4,0,0,0,2,4,3,3,1,3,0,4,2,3,4,4,1,1,0,4,4,1,3,1,0,0,2,3,1,1,3,1,1,2,1,1,0,0,1,3,0,1,1,0,4,1,3,1,3,2,2,2,2,3,1,3,3,3,3,3,1,0,4,3,0,1,4,3,1,0,1,1,0,4,0,0,0,4,4,2,2,2,2,3,2,2,2,2,2,2,2,2,2,1,2,2,2,2,2,2,2,2,2,0,2,2,2,2,2,2,2,2,2,2,2,2,2,2,2,2,2,2,2,2,2,2,2,2,2,2,2,2,2,2,2,2,2,2,1,2,2,2,2,2,2,2,1,2,3,2,1,2,1,3,3,2,2,1,2,2,2,2,2,2,2,1,3,4,3,2,1,3,4,3,1,2,2,2,2,4,2,2,4,2,2,4,0,2,4,0,0,2,2,0,2,4,0,2,4,2,2,4,0,2,4,2,2,2,0,2,2,2,2,0,0,2,0,2,2,2,2,4,2,2,0,2,0,4,2,2,1,1,4,0,4,4,4,4,4,4,0,0,4,3,3,3,2,0,2,1,3,1,3,2,0,4,1,2,4,1,3,3,4,4,4,1,4,2,1,2,4,0,4,2,4,0,0,2,1,0,4,0,2,3,4,2,1,0,2,0,3,4,4,1,2,3,0,2,0,3,1,1,2,1,2,0,3,0,0,1,3,0,0,2,0,0,0,0,4,0,1,3,4,0,2,4,4,3,1,1,4,1,4,4,1,0,3,3,1,2,4,2,3,1,1,4,4,0,2,3,4,0,1,1,0,0,3,0,3,1,4,3,1,4,4,4,3,1,1,1,3,1,0,2,4,1,4,1,3,0,0,0,1,4,0,0,4,0,0,0,0,4,2,0,4,4,0,1,0,1,4,1,3,0,0,0,4,4,0,3,4,0,1,1,0,1,3,1,0,3,2,0,1,1,3,4,0,1,3,2,0,1,3,3,3,0,2,3,4,3,3,3,4,0,4,1,3,2,2,3,1,3,3,2,1,3,3,1,1,1,3,2,1,3,3,3,3,3,1,1,1,1,1,2,2,3,1,0,2,2,1,2,1,1,1,0,4,4,0,2,1,2,1,1,2,1,3,1,1,2,2,2,2,1,3,2,1,2,3,3,1,3,1,3,2,3,3,1,3,1,2,2,3,1,0,4,0,3,0,0,3,3,3,4,3,1,2,2,1,2,1,3,2,2,2,2,1,2,0,1,2,3,4,0,4,4,2,2,0,2,2,1,3,1,2,3,0,3,1,4,1,3,1,3,0,3,1,3,2,0,0,2,2,2,0,2,2,2,4,0,4,0,4,0,4,4,4,4,4,4,4,3,1,1,3,1,1,0,1,4,3,1,1,4,4,4,0,4,2,2,1,2,4,1,3,3,1,3,1,2,3,1,2,0,0,2,2,0,0,1,3,0,4,0,0,4,4,2,1,1,2,1,3,1,2,3,1,1,0,0,4,0,0,4,4,4,4,0,0,3,3,3,3,1,0,2,2,2,2,2,1,1,2,3,1,3,2,1,1,4,3,0,1,1,1,4,3,0,4,1,3,3,4,1,2,4,2,2,4,3,2,3,2,1,2,1,4,3,2,1,1,3,3,1,3,1,1,2,2,3,0,4,0,2,3,1,1,0,0,3,4,1,0,3,2,0,1,4,2,1,4,1,3,4,2,3,3,1,1,1,3,3,1,1,1,1,2,3,2,3,3,1,1,3,1,1,0,3,4,0,1,1,3,1,0,3,3,2,0,3,1,1,3,2,0,3,1,2,1,4,1,1,1,0,3,2,2,2,1,1,2,3,1,1,3,3,1,2,1,1,0,4,2,4,1,4,4,2,2,1,4,4,4,2,1,0,0,1,1,3,4,1,2,0,0,2,2,4,0,0,3,3,3,1,3,0,1,3,2,0,3,4,2,1,4,2,4,2,4,2,1,3,0,3,4,4,2,2,3,2,4,3,0,2,4,1,1,4,2,2,1,2,4,2,0,0,0,4,0,1,4,0,0,0,4,4,4,0,0,0,4,4,4,1,3,1,3,4,4,4,0,4,3,4,3,1,4,0,4,0,4,4,4,0,4,0,0,0,4,0,4,4,1,1,4,3,3,0,3,0,4,0,0,3,4,0,4,4,4,3,0,0,4,0,1,3,0,1,4,3,1,3,3,0,1,3,4,0,1,1,3,1,3,4,1,4,0,0,1,3,3,4,3,1,1,4,0,1,0,4,0,4,0,0,3,0,4,0,0,0,0,1,1,0,0,0,0,4,3,0,4,1,0,3,4,0,3,4,4,3,2,4,0,2,0,3,4,3,3,3,4,0,2,4,0,4,0,0,3,4,2,3,0,0,3,1,3,2,2,4,0,0,4,0,0,0,0,4,0,0,0,2,0,4,2,0,0,0,0,2,0,4,2,2,2,0,0,2,2,0,4,4,0,4,4,0,4,4,4,0,4,0,0,0,4,4,4,0,4,0,0,4,4,0,4,0,4,0,4,0,4,0,4,4,4,4,0,4,4,4,4,4,0,4,4,0,4,0,0,0,0,4,0,0,0,0,4,0,4,3,0,4,3,0,2,3,1,4,4,4,4,4,1,2,4,2,2,4,0,0,2,2,4,0,4,3,2,1,0,2,2,0,3,1,0,0,0,4,4,2,4,1,1,0,3,1,4,2,0,0,0,4,4,4,0,0,4,4,3,0,0,0,0,1,4,3,3,4,4,2,3,2,4,0,0,4,4,2,1,3,1,4,1,1,0,0,4,0,0,3,4,0,1,3,0,3,4,4,3,3,4,4,3,4,2,0,0,4,0,0,4,1,4,4,4,4,0,4,0,0,4,0,2,2,4,4,0,4,3,0,0,1,4,4,0,4,0,4,0,1,1,2,0,1,0,0,4,0,1,2,2,4,0,2,0,0,4,4,4,3,3,4,3,1,3,0,4,0,0,4,3,0,0,2,1,0,0,1,2,4,3,4,3,0,0,4,2,0,4,2,3,2,4,4,3,1,4,1,1,2,4,1,4,1,4,0,4,4,0,0,0,1,0,4,1,0,4,0,4,0,4,2,3,0,4,2,1,4,4,4,2,3,4,1,4,4,0,2,0,1,0,0,4,4,0,0,0,4,0,4,0,2,4,3,4,4,4,4,4,3,4,4,2,3,1,0,0,2,1,4,4,4,4,0,4,0,1,3,1,1,0,4,3,1,0,0,3,1,4,0,2,2,1,0,4,3,0,0,0,3,0,4,4,0,0,4,2,1,4,1,1,3,1,2,4,4,3,2,3,3,4,4,4,0,0,1,0,2,0,1,4,0,4,0,4,2,0,2,0,0,2,2,4,0,4,2,4,2,3,2,0,4,2,4,0,2,4,0,0,0,0,4,4,2,3,0,0,4,4,4,2,4,0,0,2,4,0,2,4,0,4,0,4,4,2,4,0,0,4,3,2,4,4,0,4,3,0,1,1,1,4,0,4,4,2,1,0,0,0,0,3,0,4,0,0,0,0,1,2,0,2,0,4,0,3,4,0,3,4,1,1,4,0,3,4,4,0,0,0,3,0,0,3,3,3,1,0,0,4,4,0,3,1,3,0,3,0,1,3,4,3,3,0,4,4,3,1,3,1,1,3,3,1,0,4,0,3,3,4,0,4,1,0,3,1,3,1,1,1,3,3,1,1,0,3,2,1,1,1,3,3,0,3,1,3,0,2,3,3,4,0,0,1,3,1,1,4,1,1,4,3,4,0,0,0,0,4,0,0,2,3,1,2,4,1,3,0,2,1,0,4,0,0,3,4,3,3,1,1,3,0,3,1,1,0,4,0,3,3,1,2,1,3,1,1,3,3,4,3,1,1,3,3,1,0,3,1,1,1,1,4,1,4,1,0,3,1,4,0,0,0,1,1,4,0,4,4,3,4,0,0,4,2,4,0,2,0,4,4,0,4,4,0,2,0,4,4,2,0,4,2,2,2,2,2,0,0,0,0,4,0,0,0,0,3,2,0,2,0,4,0,4,2,2,2,2,2,0,0,4,2,2,4,2,4,4,4,0,0,0,2,2,2,0,4,4,4,0,4,0,0,4,4,0,4,0,0,0,4,4,4,4,4,0,4,0,4,0,4,2,0,4,4,0,0,0,0,2,4,2,4,4,0,2,2,0,4,0,0,4,4,2,0,0,0,2,4,0,0,2,4,2,2,0,4,0,4,4,4,4,4,4,2,4,0,4,4,4,4,4,2,4,2,4,2,2,0,2,2,4,4,4,4,2,4,4,2,4,4,0,2,2,2,4,2,4,0,2,2,2,0,2,4,2,2,2,0,2,2,4,4,2,2,4,4,2,2,2,2,4,2,2,2,2,2,4,0,2,0,2,2,0,2,2,2,2,0,4,0,2,2,2,2,2,2,4,2,2,2,0,2,2,1,2,2,2,0,0,1,0,0,0,4,4,4,0,2,4,4,4,0,4,2,0,0,2,0,4,2,3,4,4,4,0,2,4,0,2,1,1,1,4,4,1,4,0,3,0,0,0,3,2,2,1,2,0,4,3,4,3,2,3,3,1,2,3,0,1,0,0,0,1,3,2,4,2,0,0,2,1,4,4,3,0,0,2,4,0,4,4,2,4,2,0,2,0,2,0,2,2,0,2,0,2,0,1,3,4,3,0,1,1,3,3,0,4,4,1,4,3,3,0,4,2,2,2,0,3,1,0,2,3,2,0,0,3,0,4,2,4,4,2,0,1,1,4,4,1,1,4,2,1,1,0,3,2,2,3,3,0,1,1,1,0,1,0,0,0,0,0,0,4,4,0,0,0,0,4,1,0,4,1,4,3,4,3,1,4,2,0,4,4,2,3,1,3,1,1,3,4,4,3,4,0,0,0,0,4,0,0,3,1,3,4,0,3,1,0,2,4,4,0,0,0,2,1,0,3,4,3,4,2,2,3,3,3,4,3,0,4,3,1,1,3,1,3,1,3,1,3,0,0,0,4,0,3,4,0,1,3,0,1,1,3,4,1,3,0,1,4,1,3,3,1,0,1,1,3,3,0,4,0,4,4,1,1,3,3,0,3,0,3,4,0,4,1,1,3,0,4,4,3,0,1,4,0,1,1,0,4,3,4,4,3,3,4,1,0,0,3,4,4,1,3,3,1,1,3,4,3,1,0,4,2,0,0,4,0,0,4,0,4,2,4,2,4,0,4,4,0,4,4,3,4,3,3,4,3,1,4,0,0,0,0,2,0,4,4,4,2,4,4,4,2,4,2,0,0,0,1,0,3,4,4,1,3,4,0,0,4,0,2,2,2,0,3,4,0,4,0,0,0,4,4,3,1,1,4,0,4,3,3,4,4,0,4,4,4,4,0,2,0,4,4,3,0,3,3,4,0,3,4,0,0,4,0,0,4,0,3,0,0,4,0,0,0,4,4,2,4,4,4,4,4,4,0,0,4,4,4,0,0,4,0,2,3,0,4,0,4,4,0,4,0,4,4,0,3,4,2,4,0,2,2,2,0,0,0,1,2,4,4,3,0,4,0,2,0,0,0,0,1,0,4,1,0,1,4,4,0,0,0,0,0,0,0,4,3,4,0,4,0,3,0,0,1,3,4,0,4,3,1,3,2,1,0,2,4,3,3,3,1,2,3,2,3,2,2,2,0,2,3,1,0,1,2,2,2,0,1,2,2,2,3,2,0,2,0,2,4,4,2,2,2,2,1,2,4,3,3,2,2,0,1,0,3,2,0,0,1,2,2,2,2,0,4,2,0,2,2,4,2,2,2,0,4,2,2,2,4,2,1,3,2,0,2,2,2,2,2,2,2,2,2,1,2,2,2,0,1,1,4,4,0,3,2,2,0,2,2,0,4,2,0,4,2,0,2,0,2,0,4,2,2,0,0,4,2,2,2,4,0,4,4,0,0,0,4,2,0,2,4,2,0,0,4,3,0,0,4,4,1,0,0,4,4,4,1,1,4,4,3,3,0,2,1,0,4,4,3,2,2,0,1,1,2,3,1,4,0,4,1,4,2,0,2,4,4,2,3,0,0,4,1,3,1,2,0,2,0,2,2,4,2,2,2,4,2,2,1,2,2,2,2,2,0,2,3,2,3,2,2,1,4,1,4,2,3,2,4,2,0,0,1,3,4,0,1,4,4,3,3,4,4,4,4,0,4,0,0,0,4,4,0,0,4,0,4,2,4,0,2,0,0,0,4,0,2,2,0,2,4,2,4,0,0,0,2,4,2,4,4,4,2,2,2,0,2,0,2,2,0,2,4,2,4,2,2,2,4,0,2,2,4,4,2,4,4,2,0,4,0,4,4,4,0,4,2,0,4,2,0,4,0,2,2,2,0,0,4,4,4,0,0,0,4,0,0,4,0,1,0,0,0,3,4,1,3,1,4,1,4,4,4,4,0,4,0,4,3,0,4,0,0,4,1,1,4,0,4,0,4,0,0,0,3,3,1,3,1,4,4,0,2,0,0,0,2,2,4,4,0,0,2,1,3,3,4,4,4,1,4,3,1,1,0,3,3,4,3,1,4,1,1,1,1,0,0,3,0,1,0,1,0,4,4,2,0,4,3,0,0,1,4,4,1,4,0,4,1,0,1,1,0,4,4,2,1,0,1,0,2,1,0,0,1,2,2,2,2,4,4,2,2,3,2,1,3,3,2,2,1,2,3,3,2,2,3,1,1,0,2,1,4,4,1,2,1,1,0,0,1,4,1,1,4,0,3,2,1,1,1,1,1,1,1,1,0,4,2,4,3,4,4,3,1,3,2,3,3,3,3,2,3,1,2,2,3,0,3,4,2,3,1,3,0,0,0,3,3,1,1,3,2,3,1,3,4,1,3,0,2,2,1,3,4,1,3,1,3,3,3,4,0,4,3,4,0,4,3,1,2,1,2,4,3,0,0,3,1,1,1,3,4,4,3,4,1,0,4,4,1,4,1,0,4,0,3,1,1,1,4,1,4,4,0,4,3,0,0,3,1,4,4,0,4,3,3,4,3,0,4,4,4,4,1,3,0,3,3,4,1,3,1,3,2,0,0,4,0,3,3,2,1,3,1,0,1,0,2,0,0,3,3,3,0,4,0,2,1,4,2,1,4,1,4,1,0,4,3,1,0,4,2,3,3,3,3,1,0,1,3,0,4,3,3,3,1,2,0,1,4,3,3,2,3,1,1,4,3,3,4,1,0,3,1,4,4,0,4,3,0,3,2,3,3,1,4,1,1,3,3,1,4,3,1,3,4,3,2,2,3,0,0,3,1,2,1,2,4,0,3,2,4,4,3,1,3,1,2,2,2,4,3,0,2,4,0,0,0,0,4,4,2,3,0,3,3,2,4,4,2,2,2,0,1,3,0,0,0,3,4,0,3,1,0,1,0,0,0,0,4,1,3,3,0,1,3,4,4,1,3,3,4,4,3,1,3,4,1,0,0,3,1,4,1,3,1,3,0,0,2,2,4,2,0,4,4,1,4,4,0,0,4,1,4,1,4,2,2,4,1,0,0,2,2,4,4,3,0,0,4,2,4,1,0,1,4,4,0,0,0,4,1,1,1,0,1,2,0,1,3,1,1,4,3,2,0,1,2,2,3,0,3,0,2,0,4,4,3,2,1,1,1,1,0,4,0,3,1,3,4,3,0,3,4,0,0,0,4,0,3,4,2,0,2,1,0,0,2,0,1,0,2,0,2,4,4,0,3,1,1,2,2,3,1,3,1,2,2,3,3,2,0,4,2,1,0,1,1,1,3,2,0,4,4,1,1,1,2,3,4,0,4,0,4,4,4,4,4,0,3,3,1,4,2,0,3,4,2,2,4,4,1,0,4,4,0,4,0,4,0,4,0,2,0,2,4,4,2,0,4,4,0,0,4,4,4,0,4,0,4,0,0,0,2,4,4,1,1,0,4,0,0,1,3,0,1,4,1,4,2,1,3,3,1,3,0,4,4,1,0,4,1,4,0,4,0,0,4,0,4,0,3,0,1,1,4,0,4,4,0,4,0,4,1,1,0,1,4,3,1,3,0,0,4,1,4,4,1,1,3,4,4,1,0,3,3,4,0,0,3,0,0,0,1,4,0,0,0,1,4,0,0,0,0,3,3,4,0,4,1,0,4,0,0,0,0,0,4,0,0,4,0,0,4,4,4,0,4,4,0,4,0,0,0,0,4,4,4,4,0,0,3,4,3,1,4,0,1,4,0,0,4,0,0,3,0,0,1,4,0,1,0,4,0,0,1,4,3,0,0,0,4,1,4,4,4,0,0,4,0,3,0,4,0,4,0,4,0,4,0,4,4,0,4,1,0,1,4,0,1,1,0,0,0,4,0,0,4,1,1,0,3,3,4,4,0,0,0,0,4,4,4,4,4,4,0,0,0,0,0,4,3,0,4,4,0,4,4,0,4,2,2,3,0,0,0,0,4,3,3,4,4,4,0,2,3,2,2,2,3,2,2,0,3,1,2,2,2,2,3,1,1,3,2,1,0,2,4,3,2,4,4,0,0,0,1,0,0,2,2,2,2,0,0,2,2,2,2,2,0,4,4,2,2,2,2,4,2,2,2,2,2,2,2,3,0,2,0,0,2,2,3,2,0,2,1,0,0,0,0,4,4,0,4,4,4,1,3,4,0,4,0,4,0,4,4,0,0,0,0,4,4,4,4,0,4,4,4,1,0,1,0,0,4,1,0,1,0,4,4,0,4,1,0,4,0,4,4,0,0,3,3,3,4,0,0,4,4,3,0,0,0,0,4,4,4,4,4,0,0,0,0,0,4,0,4,4,0,4,0,4,4,0,4,0,0,4,0,0,1,0,4,0,0,0,0,4,0,0,1,4,4,4,0,3,4,0,4,4,0,4,0,4,4,0,4,0,0,0,4,2,0,0,0,4,4,1,4,1,4,4,3,0,2,2,0,0,1,1,3,4,3,0,0,4,1,4,1,4,0,4,3,4,3,3,1,3,3,3,1,0,3,4,3,3,1,0,0,0,4,0,3,1,4,0,4,0,0,0,4,0,4,4,1,1,3,4,0,1,0,0,4,0,4,0,4,4,2,2,2,0,2,1,2,0,4,0,2,0,4,0,4,0,3,4,3,1,0,0,4,0,1,2,2,0,0,1,3,1,1,0,4,4,4,1,2,1,4,1,4,0,4,4,0,1,4,4,4,0,0,4,4,4,2,2,1,0,1,0,0,0,0,2,1,0,3,0,4,4,0,4,0,0,4,0,1,2,3,0,4,3,1,3,3,2,0,2,1,0,2,4,1,1,1,4,2,0,4,4,1,0,0,4,4,0,1,3,4,0,0,3,0,3,3,1,0,0,1,4,4,1,0,3,1,4,0,3,1,3,4,4,0,0,4,4,3,4,1,1,3,1,4,0,0,3,0,0,4,0,0,2,3,0,4,4,3,2,0,1,1,4,4,4,4,4,3,4,0,0,2,0,0,0,4,2,1,4,4,4,4,4,4,0,4,4,0,4,1,4,0,4,0,4,4,3,2,3,0,2,4,4,0,0,4,4,2,1,4,1,4,0,0,3,0,3,4,4,0,0,0,2,4,4,3,1,3,2,2,4,2,0,2,2,0,3,2,1,2,0,1,4,4,2,4,3,1,4,4,3,0,4,4,4,4,2,3,1,0,2,2,4,4,0,2,4,4,0,2,0,2,1,3,3,2,4,0,2,0,4,2,0,4,2,0,3,2,2,4,4,0,3,0,1,2,3,2,1,0,1,2,0,1,3,4,0,0,2,3,4,4,1,1,0,3,3,0,4,0,3,1,1,1,1,1,1,1,0,4,4,1,4,0,1,0,3,3,0,1,1,2,2,3,2,3,3,2,4,2,3,1,0,0,2,3,0,4,1,1,1,4,0,2,1,0,4,4,1,1,3,0,4,4,2,0,0,2,4,2,2,0,1,4,4,4,1,4,2,2,4,4,0,4,0,2,2,2,2,0,2,0,2,4,4,0,0,4,4,0,0,0,2,4,0,3,1,4,1,1,1,0,2,3,1,2,3,2,0,3,0,2,2,1,0,0,0,1,2,1,1,4,0,0,0,3,0,2,3,3,4,4,2,4,0,0,1,1,0,1,3,0,3,2,2,2,4,0,1,3,1,4,2,3,2,1,3,2,1,1,0,2,3,2,2,1,1,1,1,3,4,0,2,2,0,0,1,1,4,2,1,3,1,3,2,1,3,3,2,3,2,3,3,2,0,3,0,1,4,1,4,0,4,3,3,0,1,4,0,1,1,3,0,0,4,4,4,1,0,1,4,4,3,0,4,3,1,1,4,1,0,1,1,0,4,1,1,3,4,1,1,0,3,2,3,3,1,3,1,4,1,0,4,4,0,3,4,4,2,2,2,2,4,4,2,0,0,2,3,2,2,4,0,4,2,2,2,4,0,4,4,0,4,1,3,4,1,4,3,3,3,4,4,0,4,0,1,3,0,0,3,3,3,3,3,1,1,3,0,4,4,3,1,4,3,3,4,3,4,3,1,4,0,4,4,0,1,1,1,3,4,1,1,3,3,4,2,1,0,2,1,3,3,3,4,1,3,0,4,1,3,3,3,2,3,0,4,4,2,3,3,4,1,3,2,0,3,1,3,0,1,1,2,2,3,2,4,3,2,2,2,0,0,0,3,2,2,0,0,1,4,3,2,3,4,2,1,2,1,1,1,1,0,3,0,2,3,2,3,3,0,3,1,3,1,1,2,2,1,2,3,3,2,1,0,0,0,1,2,4,0,0,4,0,3,0,4,0,4,2,2,2,2,4,0,0,4,2,0,0,2,1,0,2,1,2,2,4,3,4,0,2,4,4,4,2,3,3,3,3,3,3,0,0,4,4,0,4,2,0,3,1,3,1,3,0,4,0,3,3,0,0,0,4,4,2,4,4,2,2,0,4,4,4,4,2,2,2,0,4,4,4,1,4,4,4,0,2,2,2,0,2,3,2,2,4,4,4,0,2,0,0,2,4,0,2,0,0,0,0,4,4,2,4,2,2,3,4,2,2,2,3,3,3,3,2,0,0,3,1,1,3,2,3,0,1,2,0,0,3,3,4,3,2,0,4,3,1,4,3,2,3,1,0,1,0,3,4,3,2,2,2,2,3,2,3,4,0,4,4,2,0,3,2,3,1,0,2,2,2,3,3,3,4,3,0,4,0,4,0,4,4,1,1,1,3,1,1,1,1,1,3,3,1,4,0,3,3,3,3,3,1,1,3,3,3,1,2,2,3,2,2,4,0,2,0,2,2,3,1,0,2,2,4,0,2,3,1,2,2,2,3,3,3,0,4,1,4,2,0,4,4,0,2,2,1,1,3,0,4,4,4,1,2,2,2,2,4,3,1,1,0,1,0,1,1,2,2,3,1,1,0,2,3,2,0,1,1,1,2,2,0,1,2,1,3,1,2,2,2,2,2,0,2,0,2,2,2,4,4,2,2,0,0,4,2,2,2,2,0,0,2,0,2,0,4,0,4,4,0,0,4,4,4,2,2,0,4,4,4,2,2,2,4,2,2,4,2,0,2,4,0,2,2,4,4,4,4,0,0,4,0,0,4,0,4,1,3,3,0,0,1,1,3,4,0,1,0,0,2,2,4,2,4,2,4,2,2,0,2,0,0,4,0,2,2,1,2,2,2,0,2,2,4,2,4,2,0,4,0,2,4,4,2,2,3,2,0,0,4,2,0,4,0,4,0,0,0,2,0,0,0,0,0,4,2,0,4,0,0,2,0,0,2,3,2,2,2,4,2,2,2,2,4,2,2,0,4,0,2,0,2,0,4,0,2,0,4,2,2,0,4,2,4,4,2,2,0,4,4,0,2,0,0,4,2,4,0,4,0,0,4,4,0,0,2,4,2,2,2,4,4,0,4,0,0,4,0,4,0,4,4,4,0,4,4,4,0,0,4,4,0,0,4,0,0,4,4,0,0,4,0,4,0,4,4,4,4,4,4,0,0,0,0,0,0,4,0,4,4,4,0,0,4,0,0,4,4,4,0,4,4,4,0,0,4,0,0,0,0,1,0,0,4,4,0,4,0,4,4,0,0,0,4,0,0,0,4,0,4,4,4,0,4,0,0,4,2,2,2,2,2,0,0,2,2,0,2,3,2,2,2,2,2,2,2,2,2,2,2,2,2,2,2,0,2,2,4,4,4,0,0,0,4,4,4,4,4,0,0,4,0,0,4,0,4,0,4,0,4,0,4,4,0,0,4,4,4,0,0,3,4,0,0,0,4,2,2,2,2,2,0,0,2,2,2,2,2,2,2,2,2,0,2,2,4,2,4,4,2,4,0,2,2,0,2,2,2,0,2,4,2,2,2,2,2,2,2,2,2,2,2,4,2,2,2,2,2,2,2,2,2,2,2,2,2,0,2,4,2,2,2,2,2,4,0,2,4,2,2,2,2,4,2,2,2,2,2,2,2,0,2,2,0,2,2,2,2,2,2,2,2,2,0,2,4,4,2,2,0,4,2,2,2,2,2,0,4,0,4,2,2,2,2,4,2,2,2,2,4,4,4,2,0,2,2,2,4,4,2,4,4,0,2,2,2,0,0,4,4,4,4,4,0,0,4,0,4,4,4,0,4,0,4,4,4,0,0,4,4,4,4,0,0,4,0,0,0,0,0,4,0,4,4,0,0,0,0,0,4,4,4,2,2,2,2,0,2,2,4,0,2,2,2,2,2,2,2,2,2,2,2,2,0,0,4,2,2,2,0,4,2,2,0,2,2,2,2,2,2,0,2,0,2,2,2,2,4,2,4,2,0,0,0,2,4,1,2,2,0,4,2,2,2,4,0,0,3,4,4,0,2,2,4,2,2,4,2,2,2,0,2,2,0,0,0,2,0,4,2,0,4,4,0,0,0,2,2,2,2,4,2,2,2,0,2,2,2,0,0,4,2,0,2,2,0,0,4,2,2,0,2,4,4,0,2,4,2,2,2,2,0,2,2,2,2,4,0,2,0,2,2,0,4,2,0,2,2,2,4,2,2,0,2,0,4,0,0,0,2,2,4,2,2,4,0,4,2,0,4,2,0,0,0,4,2,0,4,2,2,4,2,0,0,4,4,2,0,2,4,0,4,0,4,4,4,4,2,0,4,2,2,2,2,4,4,2,2,2,2,2,4,2,0,0,2,0,2,0,0,0,2,4,2,4,4,1,4,0,0,2,0,2,0,4,4,4,4,4,0,0,2,2,2,4,4,0,4,0,4,4,4,4,0,4,0,4,4,2,4,0,0,2,2,2,2,2,2,0,0,0,4,4,4,0,0,4,4,4,4,0,2,2,2,2,2,2,4,0,4,0,4,4,4,0,2,0,0,0,4,2,0,0,4,2,1,4,2,4,1,2,0,0,2,0,4,2,4,4,4,2,4,2,0,2,4,2,2,1,4,4,0,0,0,4,4,0,0,2,2,4,4,4,0,4,2,0,0,4,4,0,0,0,3,4,0,2,4,4,4,0,4,2,2,0,3,0,0,4,4,0,2,2,2,0,2,4,4,4,2,0,2,0,4,2,4,0,0,0,2,4,0,4,2,4,4,0,4,0,0,4,2,0,2,4,4,1,3,4,1,3,2,1,1,1,3,4,3,3,2,2,2,0,3,1,1,0,0,0,2,0,4,4,0,1,1,4,3,2,0,1,3,4,1,4,4,2,2,2,3,0,0,3,0,0,0,2,1,2,3,2,1,0,3,4,2,2,4,1,4,1,3,2,0,4,0,3,1,3,2,1,3,1,3,3,3,1,0,1,3,3,1,3,3,1,2,2,1,2,2,2,3,0,0,3,3,1,4,3,1,1,0,3,1,1,3,3,4,3,4,3,3,1,1,2,1,3,1,3,4,3,3,3,3,1,1,1,1,3,1,1,1,1,1,4,1,3,0,3,1,3,0,1,4,4,3,1,2,3,3,4,0,2,0,4,0,4,0,4,0,0,0,1,4,1,4,3,4,4,0,3,0,4,4,0,0,4,0,4,0,0,0,0,4,0,4,0,0,0,0,4,0,4,0,0,0,0,4,0,4,4,4,4,0,4,0,0,4,0,0,1,0,4,0,0,4,3,4,4,0,0,0,4,2,4,2,4,0,0,4,4,3,0,4,4,0,1,0,4,1,3,0,0,0,4,0,0,4,0,4,4,0,0,4,0,3,4,0,4,0,0,0,0,0,0,0,0,1,4,4,0,4,0,0,0,0,0,0,0,1,0,0,4,0,4,1,0,4,4,0,0,0,4,3,4,0,2,3,3,1,2,4,2,2,0,2,1,0,3,0,4,3,4,4,2,0,2,2,0,0,4,0,4,0,4,4,0,4,4,0,4,4,4,4,0,4,0,0,4,4,0,4,4,3,3,4,0,3,3,3,1,4,0,0,0,4,4,1,4,3,3,0,1,4,4,3,0,4,4,3,4,1,1,3,4,0,4,4,4,0,0,3,3,0,3,3,4,4,0,4,0,0,0,4,4,0,1,2,1,3,4,4,0,3,1,4,4,4,0,4,4,4,2,0,4,3,2,0,4,4,0,3,4,4,1,1,2,2,4,2,2,2,0,4,0,4,2,2,3,1,4,2,2,4,3,0,1,4,1,3,2,4,3,3,0,2,4,0,2,2,2,2,4,2,0,2,4,4,2,0,2,0,4,2,2,2,2,2,0,2,2,0,4,4,0,4,2,0,2,2,2,2,4,2,4,4,0,0,2,0,4,4,4,4,0,2,4,2,0,2,4,2,2,0,2,4,4,4,0,0,4,4,4,4,4,0,0,4,3,4,0,4,4,2,4,2,2,2,4,0,0,4,0,0,0,4,4,0,0,4,0,0,0,0,3,4,4,3,3,0,3,2,4,3,4,1,4,0,3,4,0,2,3,0,4,0,4,2,2,2,4,0,2,0,0,0,3,1,0,4,3,4,1,0,0,3,3,3,0,4,0,4,2,0,2,0,0,4,4,0,2,0,0,3,3,1,1,3,1,0,4,3,3,4,3,4,0,3,1,0,1,2,0,4,3,3,0,3,3,0,0,2,3,1,0,3,2,2,4,1,2,2,2,2,1,2,4,0,1,0,3,3,0,4,4,0,4,1,4,0,3,3,1,1,1,4,4,4,2,3,0,1,4,4,3,4,4,4,0,3,4,4,4,4,1,4,3,4,2,1,0,1,0,3,2,3,0,4,4,1,4,0,0,4,1,3,1,1,1,3,1,3,3,2,3,1,3,1,2,1,4,2,1,3,4,4,3,1,4,3,1,0,3,4,0,3,3,3,2,1,1,0,4,3,0,1,3,0,1,0,1,2,0,2,2,4,1,0,1,1,2,2,2,4,4,0,2,2,0,1,3,3,1,0,4,3,4,1,2,0,3,4,0,1,3,0,0,1,1,1,4,4,4,3,3,4,1,3,3,1,1,3,4,0,3,3,3,4,2,4,3,3,3,4,3,0,1,2,4,3,1,2,4,3,3,2,2,2,3,1,0,3,0,3,3,0,2,3,2,2,2,0,3,2,4,3,2,3,2,0,4,2,1,2,2,2,2,2,3,1,2,2,2,2,3,2,2,4,2,1,4,2,2,2,2,1,2,1,3,1,0,2,3,2,2,2,2,2,2,4,4,2,2,2,4,2,0,3,1,3,1,4,0,2,0,2,2,2,2,2,2,2,2,2,2,2,2,1,2,4,2,4,2,2,2,2,2,4,2,1,2,2,2,4,2,4,0,1,3,3,0,4,0,2,1,3,4,4,4,4,1,1,1,1,1,0,4,4,0,0,0,0,0,1,1,4,4,0,1,1,1,4,0,2,2,0,0,2,0,2,4,2,3,2,2,2,0,0,2,0,1,4,4,0,1,4,3,1,1,4,3,3,1,0,0,1,3,0,0,4,0,0,3,1,1,4,3,1,0,3,3,2,1,3,2,1,2,3,2,2,2,2,1,1,2,4,2,2,3,2,4,2,1,2,2,0,0,0,1,2,1,2,3,2,0,3,4,4,1,2,2,2,4,1,4,0,4,0,1,0,4,4,2,2,0,0,1,3,0,1,0,3,1,2,1,3,1,4,4,0,3,0,4,1,4,2,3,4,3,1,0,0,1,1,0,0,0,4,4,2,1,0,2,1,2,0,3,3,1,4,2,4,4,1,4,0,3,2,2,0,4,1,1,1,4,0,4,3,4,4,1,1,4,3,1,4,4,4,0,4,0,4,1,0,4,1,3,3,3,3,0,3,0,3,0,3,1,1,4,4,0,0,1,4,4,2,3,1,2,0,3,3,0,2,4,3,4,4,4,1,2,0,4,1,4,3,1,3,4,1,3,1,2,0,1,3,0,0,0,2,1,0,4,3,2,0,4,4,4,0,4,2,2,3,1,4,3,4,3,2,1,3,0,2,0,0,1,2,0,1,2,3,2,2,0,1,4,4,4,0,4,0,1,0,4
[truncated: 13,901,779 more chars]
